# Supplementary material for: Nintedanib exerts anti-pulmonary fibrosis activity via inhibiting TANK-binding kinase 1 (TBK1) phosphorylation
Source: Royal Society of Chemistry journal article supplement (doi:10.1039/d1cc05621b), 2022-01-01
Supplement: d1cc05621b1.xlsx [file d1cc05621b1.xlsx]

## Sheet: Table S1. Raw Data
Supplementary Table S2: LC-MS/MS Data for Chemoproteomic Profiling
Protein IDs	Majority protein IDs	Protein names	Gene names	Fasta headers	Number of proteins	Peptides	Unique peptides	Peptides con1	Peptides con2	Peptides con3	Peptides CP1	Peptides CP2	Peptides CP3	Peptides P2_1	Peptides P2_2	Peptides P2_3	Unique peptides con1	Unique peptides con2	Unique peptides con3	Unique peptides CP1	Unique peptides CP2	Unique peptides CP3	Unique peptides P2_1	Unique peptides P2_2	Unique peptides P2_3	Sequence coverage [%]	Unique sequence coverage [%]	Mol. weight [kDa]	Sequence length	Sequence lengths	Q-value	Score	Sequence coverage con1 [%]	Sequence coverage con2 [%]	Sequence coverage con3 [%]	Sequence coverage CP1 [%]	Sequence coverage CP2 [%]	Sequence coverage CP3 [%]	Sequence coverage P2_1 [%]	Sequence coverage P2_2 [%]	Sequence coverage P2_3 [%]	Intensity	Intensity con1	Intensity con2	Intensity con3	Intensity CP1	Intensity CP2	Intensity CP3	Intensity P2_1
P68363;F8VVB9;F8VS66;F8VRZ4;F8VWV9;C9JDS9;F8VX09;F8VRK0;F8W0F6;F8VXZ7	P68363	Tubulin alpha-1B chain	TUBA1B	sp|P68363|TBA1B_HUMAN Tubulin alpha-1B chain OS=Homo sapiens OX=9606 GN=TUBA1B PE=1 SV=1	10	37	0	18	14	17	27	27	30	28	28	34	0	0	0	0	0	0	0	0	0	86.9	0	50.151	451	451;246;130;112;81;156;75;49;231;26	0	323.31	62.3	51.2	60.3	68.1	67.8	75.8	67	75.8	84.7	1171800000000	5876800000	3910800000	4990600000	180120000000	175320000000	158560000000	201580000000
P60709;A0A2R8Y793;G5E9R0;E7EVS6;A0A2R8YGF8;C9JUM1;C9JZR7;C9JTX5;Q6S8J3;A5A3E0;A0A2R8YFE2;A0A2R8YEA7;P0CG38;Q9BYX7;P0CG39	P60709;A0A2R8Y793	Actin, cytoplasmic 1;Actin, cytoplasmic 1, N-terminally processed	ACTB	sp|P60709|ACTB_HUMAN Actin, cytoplasmic 1 OS=Homo sapiens OX=9606 GN=ACTB PE=1 SV=1;tr|A0A2R8Y793|A0A2R8Y793_HUMAN Actin, cytoplasmic 1 (Fragment) OS=Homo sapiens OX=9606 GN=ACTB PE=1 SV=1	15	32	2	18	16	18	24	29	26	30	26	29	1	1	1	1	1	1	2	1	1	78.4	7.2	41.736	375	375;309;125;163;165;96;102;80;1075;1075;79;157;1075;375;1038	0	323.31	63.5	60.3	64	69.6	77.6	74.4	77.9	72.8	77.9	834960000000	12361000000	11074000000	11644000000	125270000000	105060000000	106310000000	151650000000
P08670;B0YJC4;B0YJC5;A0A1B0GTT5;A0A1B0GVG8;H7C5W5;P41219;F8W835	P08670;B0YJC4;B0YJC5	Vimentin	VIM	sp|P08670|VIME_HUMAN Vimentin OS=Homo sapiens OX=9606 GN=VIM PE=1 SV=4;tr|B0YJC4|B0YJC4_HUMAN Vimentin OS=Homo sapiens OX=9606 GN=VIM PE=1 SV=1;tr|B0YJC5|B0YJC5_HUMAN Vimentin OS=Homo sapiens OX=9606 GN=VIM PE=1 SV=1	8	58	51	31	28	31	45	45	45	45	45	43	28	25	26	40	41	40	39	41	38	89.7	81.1	53.651	466	466;431;228;149;109;200;470;207	0	323.31	66.1	59.2	58.8	80.3	79.8	78.3	73.2	80.3	78.3	735650000000	6503300000	5788800000	8952200000	116030000000	108420000000	99422000000	125560000000
P04350;M0R2D3;M0QY85;M0R278;M0QYM7;M0R0X0;M0QY37;M0QX14;M0R042;M0QZL7;M0R1I1;M0R2T4;A0A075B724	P04350	Tubulin beta-4A chain	TUBB4A	sp|P04350|TBB4A_HUMAN Tubulin beta-4A chain OS=Homo sapiens OX=9606 GN=TUBB4A PE=1 SV=2	13	30	4	19	16	17	24	22	26	23	21	27	3	2	3	2	1	4	0	0	3	76.8	11	49.585	444	444;155;107;167;160;103;109;110;144;157;74;104;119	0	323.31	57.4	50	55.4	70.5	64.4	75	63.7	63.7	74.1	514200000000	2578700000	1573300000	2487700000	71964000000	77968000000	66389000000	87094000000
Q13085;Q59FY4;O00763;A0A0C4DGT1;A0A087X0W4;A0A087WYK6;F8W8T8;H0YGH5;A0A087WWN5;A0A087X2F8;A0A087X126;S4R3S7;A0A087WVR6;A0A087WYS8	Q13085	Acetyl-CoA carboxylase 1;Biotin carboxylase	ACACA	sp|Q13085|ACACA_HUMAN Acetyl-CoA carboxylase 1 OS=Homo sapiens OX=9606 GN=ACACA PE=1 SV=2	14	126	126	92	79	98	90	82	83	74	80	86	92	79	98	90	82	83	74	80	86	65.4	65.4	265.55	2346	2346;998;2458;120;94;114;858;859;52;84;112;155;42;96	0	323.31	52.9	46.6	55.6	51.3	48.6	49.3	47.1	47.6	52.4	206350000000	16635000000	15505000000	28761000000	26390000000	20916000000	21941000000	20460000000
P04406;E7EUT5;O14556	P04406;E7EUT5	Glyceraldehyde-3-phosphate dehydrogenase	GAPDH	sp|P04406|G3P_HUMAN Glyceraldehyde-3-phosphate dehydrogenase OS=Homo sapiens OX=9606 GN=GAPDH PE=1 SV=3;tr|E7EUT5|E7EUT5_HUMAN Glyceraldehyde-3-phosphate dehydrogenase OS=Homo sapiens OX=9606 GN=GAPDH PE=1 SV=1	3	21	21	14	11	13	17	18	17	15	18	16	14	11	13	17	18	17	15	18	16	72.8	72.8	36.053	335	335;260;408	0	323.31	52.8	46	60.6	65.1	66.3	65.1	60.6	66.6	62.1	177380000000	3570800000	1656800000	3176800000	28061000000	22195000000	21488000000	30103000000
P11498;A0A494C016;A0A494C101;A0A494C0T2;E9PRE7;A0A494BZT5	P11498;A0A494C016	Pyruvate carboxylase, mitochondrial	PC	sp|P11498|PYC_HUMAN Pyruvate carboxylase, mitochondrial OS=Homo sapiens OX=9606 GN=PC PE=1 SV=2;tr|A0A494C016|A0A494C016_HUMAN Pyruvate carboxylase, mitochondrial OS=Homo sapiens OX=9606 GN=PC PE=1 SV=1	6	54	54	46	41	44	44	43	42	40	41	43	46	41	44	44	43	42	40	41	43	62.3	62.3	129.63	1178	1178;631;483;531;489;68	0	323.31	55.4	43.7	54.3	54	52.9	53.7	48.4	49	55.4	177060000000	14763000000	13351000000	22747000000	22035000000	21203000000	20648000000	15567000000
P35579;Q5BKV1;B1AH99;A0A2R8Y4C3;A0A0C4DFM8;A1L2Z2	P35579	Myosin-9	MYH9	sp|P35579|MYH9_HUMAN Myosin-9 OS=Homo sapiens OX=9606 GN=MYH9 PE=1 SV=4	6	118	99	39	42	40	94	98	92	92	96	90	34	35	33	76	81	76	77	83	73	56.3	48.9	226.53	1960	1960;218;103;371;508;638	0	323.31	26.1	28.3	27.1	50.2	49.9	48.3	48.1	47.8	47.8	159080000000	931040000	702650000	1128100000	24445000000	21419000000	17304000000	31588000000
P14618;B4DNK4	P14618;B4DNK4	Pyruvate kinase PKM;Pyruvate kinase	PKM	sp|P14618|KPYM_HUMAN Pyruvate kinase PKM OS=Homo sapiens OX=9606 GN=PKM PE=1 SV=4;tr|B4DNK4|B4DNK4_HUMAN Pyruvate kinase OS=Homo sapiens OX=9606 GN=PKM PE=1 SV=1	2	38	5	22	17	22	31	31	31	30	31	32	1	2	1	3	2	4	3	4	4	77.2	9.4	57.936	531	531;457	0	323.31	51.6	37.5	51.2	66.5	64.8	64.8	62.1	64.8	70.2	144820000000	1802400000	1154300000	2240900000	21720000000	19678000000	17083000000	26466000000
P55060	P55060	Exportin-2	CSE1L	sp|P55060|XPO2_HUMAN Exportin-2 OS=Homo sapiens OX=9606 GN=CSE1L PE=1 SV=3	1	47	47	2	4	0	35	37	34	37	37	43	2	4	0	35	37	34	37	37	43	51.9	51.9	110.42	971	971	0	323.31	2.4	4.5	0	39.3	41.3	41	40.5	40.6	49.7	143980000000	11175000	25372000	0	20824000000	20357000000	16090000000	27545000000
P21796;C9JI87	P21796;C9JI87	Voltage-dependent anion-selective channel protein 1	VDAC1	sp|P21796|VDAC1_HUMAN Voltage-dependent anion-selective channel protein 1 OS=Homo sapiens OX=9606 GN=VDAC1 PE=1 SV=2;tr|C9JI87|C9JI87_HUMAN Voltage-dependent anion-selective channel protein 1 (Fragment) OS=Homo sapiens OX=9606 GN=VDAC1 PE=1 SV=6	2	20	20	8	10	7	18	17	17	18	19	17	8	10	7	18	17	17	18	19	17	78.8	78.8	30.772	283	283;183	0	323.31	47.3	47.3	34.6	78.4	67.5	74.9	75.3	78.4	74.6	137500000000	165850000	193900000	172880000	17818000000	16310000000	17472000000	27287000000
P10809;E7ESH4;E7EXB4;C9JL25;C9JL19;C9JCQ4;C9J0S9	P10809	60 kDa heat shock protein, mitochondrial	HSPD1	sp|P10809|CH60_HUMAN 60 kDa heat shock protein, mitochondrial OS=Homo sapiens OX=9606 GN=HSPD1 PE=1 SV=2	7	38	38	11	9	9	29	29	28	29	30	35	11	9	9	29	29	28	29	30	35	70.3	70.3	61.054	573	573;234;221;175;83;94;58	0	323.31	33	20.8	26.5	62.8	62.8	61.4	63.5	61.4	66.8	127000000000	255210000	170920000	151550000	17304000000	14543000000	13968000000	23725000000
P04843;B7Z4L4;F8WF32	P04843;B7Z4L4	Dolichyl-diphosphooligosaccharide--protein glycosyltransferase subunit 1	RPN1	sp|P04843|RPN1_HUMAN Dolichyl-diphosphooligosaccharide--protein glycosyltransferase subunit 1 OS=Homo sapiens OX=9606 GN=RPN1 PE=1 SV=1;tr|B7Z4L4|B7Z4L4_HUMAN Dolichyl-diphosphooligosaccharide--protein glycosyltransferase subunit 1 OS=Homo sapiens OX=9606	3	29	29	2	3	3	28	25	24	22	26	25	2	3	3	28	25	24	22	26	25	60.3	60.3	68.569	607	607;435;121	0	323.31	4.4	6.6	7.2	60.3	57.5	55.8	52.9	58.8	56.8	123440000000	21094000	15337000	32927000	17571000000	15741000000	14291000000	19875000000
Q96RQ3;E9PHF7;E9PG35;F5GYT8;G5E9X5;F8WDI3	Q96RQ3;E9PHF7;E9PG35;F5GYT8;G5E9X5	Methylcrotonoyl-CoA carboxylase subunit alpha, mitochondrial	MCCC1	sp|Q96RQ3|MCCA_HUMAN Methylcrotonoyl-CoA carboxylase subunit alpha, mitochondrial OS=Homo sapiens OX=9606 GN=MCCC1 PE=1 SV=3;tr|E9PHF7|E9PHF7_HUMAN Methylcrotonoyl-CoA carboxylase subunit alpha, mitochondrial OS=Homo sapiens OX=9606 GN=MCCC1 PE=1 SV=1;tr|E	6	37	37	32	29	32	31	31	32	29	31	32	32	29	32	31	31	32	29	31	32	63.3	63.3	80.472	725	725;616;598;575;434;112	0	323.31	59.6	54.6	56.7	58.3	58.6	60.8	55.9	59.4	60.1	118350000000	10822000000	7878700000	15455000000	15607000000	12570000000	11761000000	12327000000
P07355;H0YN42;H0YMD0;H0YMU9;A6NMY6;H0YKS4;H0YM50;H0YNP5;H0YN28;H0YL33;H0YMM1;H0YKZ7;H0YLV6;H0YMT9;H0YKX9;H0YNA0;H0YKL9;H0YMW4;H0YKV8;H0YN52;H0YMD9;H0YNB8;H0YKN4;H0YLE2	P07355;H0YN42;H0YMD0;H0YMU9;A6NMY6;H0YKS4;H0YM50;H0YNP5	Annexin A2;Annexin;Putative annexin A2-like protein	ANXA2;ANXA2P2	sp|P07355|ANXA2_HUMAN Annexin A2 OS=Homo sapiens OX=9606 GN=ANXA2 PE=1 SV=2;tr|H0YN42|H0YN42_HUMAN Annexin (Fragment) OS=Homo sapiens OX=9606 GN=ANXA2 PE=1 SV=1;tr|H0YMD0|H0YMD0_HUMAN Annexin (Fragment) OS=Homo sapiens OX=9606 GN=ANXA2 PE=1 SV=1;tr|H0YMU9|	24	27	27	18	18	17	20	22	19	21	21	19	18	18	17	20	22	19	21	21	19	67.3	67.3	38.604	339	339;256;227;230;339;176;248;175;139;142;149;119;132;133;134;79;110;146;81;59;65;47;69;45	0	323.31	52.8	56.3	51.3	52.8	56	57.5	55.8	56	54.3	103880000000	2976600000	2035500000	2277100000	15267000000	15991000000	7787700000	24183000000
P05165;A0A1B0GU58;A0A1B0GWI4;A0A1B0GUX9;A0A1B0GWA1;A0A1B0GTR1;H0Y5U0;Q5JTW6;H0Y4B9;H0Y798;Q5JVH2;A0A2R8Y725	P05165;A0A1B0GU58;A0A1B0GWI4;A0A1B0GUX9;A0A1B0GWA1	Propionyl-CoA carboxylase alpha chain, mitochondrial	PCCA	sp|P05165|PCCA_HUMAN Propionyl-CoA carboxylase alpha chain, mitochondrial OS=Homo sapiens OX=9606 GN=PCCA PE=1 SV=4;tr|A0A1B0GU58|A0A1B0GU58_HUMAN Propionyl-CoA carboxylase alpha chain, mitochondrial (Fragment) OS=Homo sapiens OX=9606 GN=PCCA PE=1 SV=1;tr|	12	46	46	39	34	40	35	34	38	30	35	36	39	34	40	35	34	38	30	35	36	65.7	65.7	80.058	728	728;615;461;398;326;245;139;149;134;84;111;82	0	323.31	58.8	58.2	62.1	58.5	58	61.3	56	59.6	58.2	98133000000	8396500000	9110900000	11755000000	12955000000	9933200000	9486000000	9592200000
O14980;C9JKM9;C9J673;C9IZS4;C9JQ02;C9JV99;F8WF71;C9JF49;C9IYM2;H7BZC5	O14980	Exportin-1	XPO1	sp|O14980|XPO1_HUMAN Exportin-1 OS=Homo sapiens OX=9606 GN=XPO1 PE=1 SV=1	10	37	37	3	1	2	32	32	32	32	31	34	3	1	2	32	32	32	32	31	34	43.3	43.3	123.38	1071	1071;179;132;94;95;100;82;59;62;72	0	323.31	4.6	1.4	3.5	36.9	36.9	36.5	36.9	36	40.7	96334000000	13712000	3378600	13553000	14267000000	12290000000	10366000000	17362000000
P08238;Q58FF7	P08238	Heat shock protein HSP 90-beta	HSP90AB1	sp|P08238|HS90B_HUMAN Heat shock protein HSP 90-beta OS=Homo sapiens OX=9606 GN=HSP90AB1 PE=1 SV=4	2	40	19	19	18	19	34	31	29	30	33	29	7	6	8	16	15	11	13	15	15	52.3	30.8	83.263	724	724;597	0	323.31	32.6	30.4	36.7	48.2	46.5	42.7	44.8	48.1	47.1	92715000000	954570000	677820000	939790000	13493000000	11820000000	10201000000	18806000000
Q92616	Q92616	Translational activator GCN1	GCN1L1	sp|Q92616|GCN1_HUMAN eIF-2-alpha kinase activator GCN1 OS=Homo sapiens OX=9606 GN=GCN1 PE=1 SV=6	1	114	114	0	1	0	93	75	79	80	92	91	0	1	0	93	75	79	80	92	91	49.9	49.9	292.75	2671	2671	0	323.31	0	0.4	0	42.3	34.8	39	36.1	40.4	42.2	67517000000	0	9965800	0	9807000000	8731700000	6625800000	13588000000
P21333;F8WE98;H0Y5C6;H0Y5F3	P21333	Filamin-A	FLNA	sp|P21333|FLNA_HUMAN Filamin-A OS=Homo sapiens OX=9606 GN=FLNA PE=1 SV=4	4	103	2	44	46	50	76	74	65	78	81	74	0	1	0	1	1	0	1	1	1	59	1.4	280.74	2647	2647;604;281;232	0	323.31	27.5	29.1	31.7	46.4	45	41	47.1	49.5	46.4	63247000000	1045500000	1186400000	1373500000	9075300000	8018600000	6165200000	12965000000
A0A087WVQ6;Q00610;J3KS13;J3KSQ2;J3QL20;K7EJJ5;J3KRF5;F5H5N6;A0A087WV74;A0A087WXH4	A0A087WVQ6;Q00610	Clathrin heavy chain;Clathrin heavy chain 1	CLTC	tr|A0A087WVQ6|A0A087WVQ6_HUMAN Clathrin heavy chain OS=Homo sapiens OX=9606 GN=CLTC PE=1 SV=1;sp|Q00610|CLH1_HUMAN Clathrin heavy chain 1 OS=Homo sapiens OX=9606 GN=CLTC PE=1 SV=5	10	71	57	26	18	24	58	50	57	48	56	60	22	14	19	46	38	43	37	44	47	52	44.4	192.06	1679	1679;1675;612;122;97;222;131;169;369;463	0	323.31	22.6	17.2	21.8	42	38	44.4	35.6	40.8	46.3	58648000000	583890000	323030000	466240000	8682900000	6192000000	8179200000	10165000000
Q15149;H0YDN1;E9PMV1;E9PKG0;E9PQ28;E9PIA2	Q15149;H0YDN1	Plectin	PLEC	sp|Q15149|PLEC_HUMAN Plectin OS=Homo sapiens OX=9606 GN=PLEC PE=1 SV=3;tr|H0YDN1|H0YDN1_HUMAN Plectin OS=Homo sapiens OX=9606 GN=PLEC PE=1 SV=9	6	184	176	38	28	21	117	110	103	120	124	110	36	27	19	115	106	98	116	117	104	45.4	43.4	531.78	4684	4684;3447;703;190;83;174	0	323.31	11	7.3	6.6	31.6	30.3	29.2	31.6	33.5	31.2	51185000000	270040000	171510000	186110000	7664100000	6531000000	5812000000	10096000000
A0A0A0MR02;P45880;Q5JSD2;Q5JSD1;A2A3S1	A0A0A0MR02;P45880;Q5JSD2;Q5JSD1	Voltage-dependent anion-selective channel protein 2	VDAC2	tr|A0A0A0MR02|A0A0A0MR02_HUMAN Voltage-dependent anion-selective channel protein 2 (Fragment) OS=Homo sapiens OX=9606 GN=VDAC2 PE=1 SV=1;sp|P45880|VDAC2_HUMAN Voltage-dependent anion-selective channel protein 2 OS=Homo sapiens OX=9606 GN=VDAC2 PE=1 SV=2;tr	5	16	16	5	5	4	14	13	12	12	14	13	5	5	4	14	13	12	12	14	13	68.1	68.1	30.348	282	282;294;194;204;109	0	323.31	23.4	23.4	19.9	64.2	64.5	59.6	60.6	67.4	62.1	50081000000	72802000	184620000	67496000	6591500000	6525500000	6005700000	8896700000
P16615;H7C5W9;Q93084;J3QSY6;H3BVB2;A0A0C4DH86	P16615;H7C5W9	Sarcoplasmic/endoplasmic reticulum calcium ATPase 2	ATP2A2	sp|P16615|AT2A2_HUMAN Sarcoplasmic/endoplasmic reticulum calcium ATPase 2 OS=Homo sapiens OX=9606 GN=ATP2A2 PE=1 SV=1;tr|H7C5W9|H7C5W9_HUMAN Sarcoplasmic/endoplasmic reticulum calcium ATPase 2 (Fragment) OS=Homo sapiens OX=9606 GN=ATP2A2 PE=1 SV=1	6	40	28	10	13	8	33	28	26	34	35	32	7	8	6	23	21	18	23	25	21	40.8	28.3	114.76	1042	1042;933;1043;50;113;46	0	323.31	16.7	18.2	13	38	35.1	34.2	36.8	37.5	36.8	49316000000	78301000	164760000	84022000	7077000000	6004800000	5283500000	9489000000
P60842;J3KT12;J3KTB5;J3QS69;J3KSZ0;J3QL43;J3QR64;J3QLN6;J3KTN0;J3QKZ9;J3KS25;J3KT04;J3KS93;J3QQP0;E7EMV8;J3KSN7;J3QL52;E9PBH4;F8WE11;C9JUF0	P60842;J3KT12;J3KTB5;J3QS69;J3KSZ0;J3QL43;J3QR64	Eukaryotic initiation factor 4A-I	EIF4A1	sp|P60842|IF4A1_HUMAN Eukaryotic initiation factor 4A-I OS=Homo sapiens OX=9606 GN=EIF4A1 PE=1 SV=1;tr|J3KT12|J3KT12_HUMAN Eukaryotic initiation factor 4A-I OS=Homo sapiens OX=9606 GN=EIF4A1 PE=1 SV=1;tr|J3KTB5|J3KTB5_HUMAN Eukaryotic initiation factor 4A-	20	24	14	13	10	11	21	21	19	21	21	20	7	6	7	14	14	13	13	13	13	55.2	32.5	46.153	406	406;341;257;300;230;271;214;163;117;134;187;85;85;95;98;109;68;96;97;57	0	323.31	40.4	33.5	36.9	53.9	53.9	50.2	52.2	54.2	53.2	45179000000	416430000	124900000	210750000	6670700000	5612900000	4929800000	9749000000
P49327;A0A0U1RQF0;A0A0U1RRG3;A0A1B0GTR5;J3KTF0	P49327;A0A0U1RQF0	Fatty acid synthase;[Acyl-carrier-protein] S-acetyltransferase;[Acyl-carrier-protein] S-malonyltransferase;3-oxoacyl-[acyl-carrier-protein] synthase;3-oxoacyl-[acyl-carrier-protein] reductase;3-hydroxyacyl-[acyl-carrier-protein] dehydratase;Enoyl-[acyl-carrier-protein] reductase;Oleoyl-[acyl-carrier-protein] hydrolase	FASN	sp|P49327|FAS_HUMAN Fatty acid synthase OS=Homo sapiens OX=9606 GN=FASN PE=1 SV=3;tr|A0A0U1RQF0|A0A0U1RQF0_HUMAN Fatty acid synthase OS=Homo sapiens OX=9606 GN=FASN PE=1 SV=1	5	90	90	18	21	22	64	57	54	51	67	66	18	21	22	64	57	54	51	67	66	51.8	51.8	273.42	2511	2511;2509;150;18;78	0	323.31	10	10	12.7	36.6	33.6	33.7	29.9	38	42.6	44240000000	202600000	179580000	321290000	6648900000	5893600000	5308100000	7289400000
O95373;E9PLB2;E9PLJ0	O95373	Importin-7	IPO7	sp|O95373|IPO7_HUMAN Importin-7 OS=Homo sapiens OX=9606 GN=IPO7 PE=1 SV=1	3	33	32	1	1	1	27	24	28	26	25	32	1	1	1	26	23	27	25	24	31	36.8	35.8	119.52	1038	1038;130;64	0	323.31	0.9	0.9	0.9	31.7	30.5	33	32.1	29.7	36.8	43443000000	12029000	3418600	0	6104400000	4947900000	4827800000	8034300000
P78527;F5GX40;H0YG84	P78527	DNA-dependent protein kinase catalytic subunit	PRKDC	sp|P78527|PRKDC_HUMAN DNA-dependent protein kinase catalytic subunit OS=Homo sapiens OX=9606 GN=PRKDC PE=1 SV=3	3	130	130	8	7	6	99	83	68	88	99	77	8	7	6	99	83	68	88	99	77	35.6	35.6	469.08	4128	4128;70;90	0	323.31	2.8	2.4	2	28.3	24.4	21	26.2	28.5	24.6	41425000000	30609000	22198000	39637000	6852700000	5808300000	3825000000	8845500000
O00410;H0Y8C6;E7ETV3;E7EV12;E7EQT5;H0Y3V4;E7EWK4;E7EX05;C9JQT6;C9JZD8;E7ETV8;E7ESZ1;C9J875;C9JXE0	O00410;H0Y8C6	Importin-5	IPO5	sp|O00410|IPO5_HUMAN Importin-5 OS=Homo sapiens OX=9606 GN=IPO5 PE=1 SV=4;tr|H0Y8C6|H0Y8C6_HUMAN Importin-5 (Fragment) OS=Homo sapiens OX=9606 GN=IPO5 PE=1 SV=1	14	48	46	2	2	1	38	34	36	35	39	36	2	1	1	37	32	34	33	37	35	60.7	60.1	123.63	1097	1097;1099;170;124;126;151;99;101;70;74;80;88;57;46	0	323.31	2.9	3.6	1.4	51.3	44.6	45.9	46.5	50.5	47.6	40332000000	14693000	7478200	7217700	6306300000	5250700000	4481300000	7729800000
O43707;F5GXS2;H7C144;K7EJH8;Q08043;A0A087WSZ2;K7EP19;M0QZQ3;C9JY79;Q9H254	O43707	Alpha-actinin-4	ACTN4	sp|O43707|ACTN4_HUMAN Alpha-actinin-4 OS=Homo sapiens OX=9606 GN=ACTN4 PE=1 SV=2	10	53	34	23	15	17	41	36	38	37	43	36	15	10	10	27	23	25	26	28	23	65.3	44.8	104.85	911	911;521;342;182;901;944;105;2002;2564;2564	0	323.31	29.1	23.3	22.2	57.6	49.3	55.2	52.3	60.3	52.6	37142000000	388410000	211480000	328370000	5627700000	4513800000	4122600000	7273500000
P41252;J3KR24;A0A0A0MSX9;Q5TCD1;Q5TCC6;Q5TCC9	P41252;J3KR24;A0A0A0MSX9	Isoleucine--tRNA ligase, cytoplasmic	IARS	sp|P41252|SYIC_HUMAN Isoleucine--tRNA ligase, cytoplasmic OS=Homo sapiens OX=9606 GN=IARS1 PE=1 SV=2;tr|J3KR24|J3KR24_HUMAN Isoleucine-tRNA synthetase, isoform CRA_d OS=Homo sapiens OX=9606 GN=IARS1 PE=1 SV=1;tr|A0A0A0MSX9|A0A0A0MSX9_HUMAN Isoleucyl-tRNA s	6	50	50	4	3	1	38	35	28	33	37	39	4	3	1	38	35	28	33	37	39	50.5	50.5	144.5	1262	1262;1152;1242;330;174;72	0	323.31	4.8	2.3	1	40.1	35.9	33.5	37	37.7	42.6	31650000000	22658000	9366100	0	5029900000	4506400000	2891200000	5690900000
M0R116;A0A2R8YEY8;A0A0A0MT26;P13637;M0QXF2	M0R116;A0A2R8YEY8;A0A0A0MT26;P13637	Sodium/potassium-transporting ATPase subunit alpha-3	ATP1A3	tr|M0R116|M0R116_HUMAN Sodium/potassium-transporting ATPase subunit alpha OS=Homo sapiens OX=9606 GN=ATP1A3 PE=1 SV=1;tr|A0A2R8YEY8|A0A2R8YEY8_HUMAN Sodium/potassium-transporting ATPase subunit alpha OS=Homo sapiens OX=9606 PE=3 SV=1;tr|A0A0A0MT26|A0A0A0MT	5	36	17	20	24	18	20	20	26	24	20	29	8	11	8	6	7	9	7	5	12	46.9	26.7	108.28	983	983;1010;1226;1013;251	0	323.31	28.8	32.9	29.5	26.2	28.1	34.1	30.5	26.9	40.9	31357000000	1051200000	1247600000	1085300000	2471700000	2213100000	6790100000	2802900000
Q14315	Q14315	Filamin-C	FLNC	sp|Q14315|FLNC_HUMAN Filamin-C OS=Homo sapiens OX=9606 GN=FLNC PE=1 SV=3	1	88	82	32	40	39	51	54	50	59	64	57	28	37	36	46	49	46	53	58	52	49.2	46.7	291.02	2725	2725	0	323.31	18.5	20.7	21	27.7	29.3	28.6	33	35.7	33.8	26821000000	353110000	440250000	686480000	3982000000	3027300000	2974500000	5553200000
Q09666;E9PKR9;E9PLK4;E9PJZ0;E9PJC6;E9PQE3	Q09666	Neuroblast differentiation-associated protein AHNAK	AHNAK	sp|Q09666|AHNK_HUMAN Neuroblast differentiation-associated protein AHNAK OS=Homo sapiens OX=9606 GN=AHNAK PE=1 SV=2	6	131	131	34	37	31	79	74	62	87	86	74	34	37	31	79	74	62	87	86	74	47.8	47.8	629.09	5890	5890;123;144;121;131;85	0	323.31	14.6	15	14.4	34.9	31	26.6	35.7	36.5	31.4	26145000000	395890000	321380000	368230000	3505400000	3174300000	2850100000	5394400000
Q9Y490;Q9Y4G6;H0YMT1;A0A1B0GVU7	Q9Y490	Talin-1	TLN1	sp|Q9Y490|TLN1_HUMAN Talin-1 OS=Homo sapiens OX=9606 GN=TLN1 PE=1 SV=3	4	81	81	35	26	28	54	50	38	59	55	52	35	26	28	54	50	38	59	55	52	48.5	48.5	269.76	2541	2541;2542;1471;1567	0	323.31	23.8	16.5	20.8	36.3	34	28.5	40	36.5	35.6	25123000000	482520000	290500000	412760000	3351900000	3423500000	1779000000	6217000000
Q14204;A0A2R8Y706;A0A2R8Y5T0;A0A2R8YFZ7;A0A2R8Y542;A0A2R8Y6H2;A0A2R8Y6I5;A0A2R8YGC7;H0YJ21	Q14204	Cytoplasmic dynein 1 heavy chain 1	DYNC1H1	sp|Q14204|DYHC1_HUMAN Cytoplasmic dynein 1 heavy chain 1 OS=Homo sapiens OX=9606 GN=DYNC1H1 PE=1 SV=5	9	132	132	12	14	7	86	68	67	81	91	87	12	14	7	86	68	67	81	91	87	36.3	36.3	532.4	4646	4646;1942;1476;1686;1076;1400;355;421;309	0	323.31	3.6	3.7	2	24	19.2	19.4	23.2	24.6	25.4	24200000000	71884000	42924000	54950000	3811800000	2967800000	2737300000	5333700000
P12814;G3V2N5;A0A494C1A0;P35609;G3V5M4;A0A494C033;A0A494C166;A0A494C060;A0A494C0Q3;G3V380	P12814	Alpha-actinin-1	ACTN1	sp|P12814|ACTN1_HUMAN Alpha-actinin-1 OS=Homo sapiens OX=9606 GN=ACTN1 PE=1 SV=2	10	52	4	22	19	19	40	38	37	39	41	40	0	1	0	3	3	3	3	4	4	67	8	103.06	892	892;260;858;894;126;182;263;588;131;72	0	323.31	34.3	32.6	29.5	58	57.5	56.4	55	60.7	60.2	24049000000	246080000	139480000	279010000	3476100000	2739400000	2557500000	5453000000
Q5VYK3;J3KN16;R4GMY1;F6XAQ5;R4GMY3	Q5VYK3;J3KN16	Proteasome-associated protein ECM29 homolog	ECM29;KIAA0368	sp|Q5VYK3|ECM29_HUMAN Proteasome adapter and scaffold protein ECM29 OS=Homo sapiens OX=9606 GN=ECPAS PE=1 SV=2;tr|J3KN16|J3KN16_HUMAN Proteasome adapter and scaffold protein ECM29 OS=Homo sapiens OX=9606 GN=ECPAS PE=1 SV=1	5	56	56	0	0	0	45	43	35	39	46	39	0	0	0	45	43	35	39	46	39	43.1	43.1	204.29	1845	1845;2017;890;142;128	0	323.31	0	0	0	35	33.6	28.4	31.7	36.5	31.9	22538000000	0	0	0	3439900000	3147300000	1969000000	4494300000
Q07065	Q07065	Cytoskeleton-associated protein 4	CKAP4	sp|Q07065|CKAP4_HUMAN Cytoskeleton-associated protein 4 OS=Homo sapiens OX=9606 GN=CKAP4 PE=1 SV=2	1	28	28	6	8	5	23	22	22	24	25	22	6	8	5	23	22	22	24	25	22	57.6	57.6	66.022	602	602	0	323.31	14.5	18.8	14.5	47.7	45.5	45.2	50.2	52.7	48.7	20424000000	62995000	53750000	44610000	3298300000	3006600000	2113100000	4497600000
Q01813;B1APP6;H0Y757;Q5VSR5;V9GY25;V9GYV7;H0Y3Y3	Q01813;B1APP6	ATP-dependent 6-phosphofructokinase, platelet type	PFKP	sp|Q01813|PFKAP_HUMAN ATP-dependent 6-phosphofructokinase, platelet type OS=Homo sapiens OX=9606 GN=PFKP PE=1 SV=2;tr|B1APP6|B1APP6_HUMAN ATP-dependent 6-phosphofructokinase, platelet type OS=Homo sapiens OX=9606 GN=PFKP PE=1 SV=2	7	30	27	7	9	5	24	23	22	23	25	22	5	8	3	22	21	20	21	22	20	48.9	44.1	85.595	784	784;568;103;210;118;113;166	0	323.31	13	16.1	8.7	41.8	41.1	41.1	39.5	43.2	41.1	20300000000	52542000	35910000	106690000	3206000000	2672400000	1896800000	3916600000
Q9NZM1;H0YD14;O75923	Q9NZM1;H0YD14	Myoferlin	MYOF	sp|Q9NZM1|MYOF_HUMAN Myoferlin OS=Homo sapiens OX=9606 GN=MYOF PE=1 SV=1;tr|H0YD14|H0YD14_HUMAN Myoferlin (Fragment) OS=Homo sapiens OX=9606 GN=MYOF PE=1 SV=1	3	76	76	12	13	12	50	45	42	50	56	53	12	13	12	50	45	42	50	56	53	47.9	47.9	234.71	2061	2061;1177;2080	0	323.31	8.2	8.2	9	32.6	29.4	28.2	32.8	35.8	35.7	18600000000	66457000	46659000	92323000	2672300000	2304000000	1649300000	4345000000
P09211;A8MX94;A0A087X2E9;A0A2R8Y5E5;A0A087X243	P09211;A8MX94	Glutathione S-transferase P	GSTP1	sp|P09211|GSTP1_HUMAN Glutathione S-transferase P OS=Homo sapiens OX=9606 GN=GSTP1 PE=1 SV=2;tr|A8MX94|A8MX94_HUMAN Glutathione S-transferase P OS=Homo sapiens OX=9606 GN=GSTP1 PE=1 SV=1	5	11	11	6	6	3	11	10	9	9	7	10	6	6	3	11	10	9	9	7	10	69	69	23.356	210	210;174;79;58;69	0	323.31	41.9	43.3	22.4	69	69	55.7	69	46.7	60.5	17070000000	216820000	109180000	141160000	2518500000	2659300000	1646800000	3742500000
P04899	P04899	Guanine nucleotide-binding protein G(i) subunit alpha-2	GNAI2	sp|P04899|GNAI2_HUMAN Guanine nucleotide-binding protein G(i) subunit alpha-2 OS=Homo sapiens OX=9606 GN=GNAI2 PE=1 SV=3	1	17	12	7	8	9	14	14	11	13	13	15	4	5	5	11	11	8	10	10	11	57.2	40.6	40.45	355	355	0	323.31	27.9	29.9	34.9	50.4	50.4	46.2	46.8	49.9	51	16793000000	101540000	92769000	121440000	2212100000	1729200000	1616100000	3644100000
P15924	P15924	Desmoplakin	DSP	sp|P15924|DESP_HUMAN Desmoplakin OS=Homo sapiens OX=9606 GN=DSP PE=1 SV=3	1	80	80	63	45	53	26	30	34	18	31	33	63	45	53	26	30	34	18	31	33	31.5	31.5	331.77	2871	2871	0	323.31	26.9	19.5	23.2	12.6	14.4	16.7	9.8	13.1	15.9	15083000000	2712900000	972280000	2689300000	1410200000	1268700000	1673400000	662190000
P08133;E7EMC6;E5RJF5;E5RK63;E5RI05;E5RFF0;E5RJR0;E5RIU8	P08133;E7EMC6	Annexin A6;Annexin	ANXA6	sp|P08133|ANXA6_HUMAN Annexin A6 OS=Homo sapiens OX=9606 GN=ANXA6 PE=1 SV=3;tr|E7EMC6|E7EMC6_HUMAN Annexin OS=Homo sapiens OX=9606 GN=ANXA6 PE=1 SV=1	8	33	16	13	10	12	27	20	19	25	25	25	6	5	7	11	8	7	12	9	11	57.9	27.5	75.872	673	673;330;129;150;129;156;110;95	0	323.31	27.9	21.1	25.7	52.6	42.9	40.1	48.4	48.1	51.3	13003000000	186350000	81383000	171230000	2114600000	1457900000	1219600000	3000300000
Q9P2E9;A0A087WVV2;F8W7S5;A0A087WU26;A2A2S5;V9GY78	Q9P2E9;A0A087WVV2;F8W7S5	Ribosome-binding protein 1	RRBP1	sp|Q9P2E9|RRBP1_HUMAN Ribosome-binding protein 1 OS=Homo sapiens OX=9606 GN=RRBP1 PE=1 SV=5;tr|A0A087WVV2|A0A087WVV2_HUMAN Ribosome-binding protein 1 OS=Homo sapiens OX=9606 GN=RRBP1 PE=1 SV=1;tr|F8W7S5|F8W7S5_HUMAN Ribosome-binding protein 1 OS=Homo sapie	6	40	39	11	14	12	25	23	22	26	31	25	10	13	11	24	23	22	26	30	25	33.4	32.8	152.45	1410	1410;934;751;346;300;229	0	323.31	12.3	12.6	12.6	25.2	24.5	22.6	26.2	28.9	25.9	12587000000	136030000	99120000	137710000	1770500000	1580000000	1551400000	2396600000
P41250;H7C443;F8WCK4	P41250	Glycine--tRNA ligase	GARS	sp|P41250|GARS_HUMAN Glycine--tRNA ligase OS=Homo sapiens OX=9606 GN=GARS1 PE=1 SV=3	3	23	23	3	4	1	18	13	15	14	16	16	3	4	1	18	13	15	14	16	16	41.4	41.4	83.165	739	739;77;79	0	323.31	5.1	6.6	2.7	33.7	22.9	28.7	28.3	30.2	34.1	10926000000	22958000	47444000	14803000	2059400000	1556500000	1187700000	1821700000
Q13813	Q13813	Spectrin alpha chain, non-erythrocytic 1	SPTAN1	sp|Q13813|SPTN1_HUMAN Spectrin alpha chain, non-erythrocytic 1 OS=Homo sapiens OX=9606 GN=SPTAN1 PE=1 SV=3	1	80	1	6	16	6	34	27	47	31	38	45	0	0	0	1	1	0	1	1	1	44.2	0.7	284.54	2472	2472	0	323.31	3	8.7	3	19.3	15.2	25.6	18.8	22	26.7	8452800000	39267000	115460000	28054000	909590000	619530000	2042200000	1125600000
P35580;E7ERA5	P35580	Myosin-10	MYH10	sp|P35580|MYH10_HUMAN Myosin-10 OS=Homo sapiens OX=9606 GN=MYH10 PE=1 SV=3	2	58	37	4	7	6	40	37	42	38	40	38	1	3	1	22	22	25	24	26	21	35.7	26.1	229	1976	1976;187	0	323.31	2.6	5	3.8	24.2	22.7	26.2	24.4	25.2	23.1	4905700000	0	4212500	0	714720000	528540000	705310000	1026600000
Q86YZ3	Q86YZ3	Hornerin	HRNR	sp|Q86YZ3|HORN_HUMAN Hornerin OS=Homo sapiens OX=9606 GN=HRNR PE=1 SV=2	1	15	15	7	6	6	8	7	9	4	8	6	7	6	6	8	7	9	4	8	6	19.7	19.7	282.39	2850	2850	0	323.31	8.7	8.4	8.1	9.7	8.7	14	6.9	9.1	11.2	2132700000	179670000	46801000	282690000	229790000	123240000	329560000	228160000
Q15365	Q15365	Poly(rC)-binding protein 1	PCBP1	sp|Q15365|PCBP1_HUMAN Poly(rC)-binding protein 1 OS=Homo sapiens OX=9606 GN=PCBP1 PE=1 SV=2	1	15	13	6	7	4	11	11	11	11	11	12	4	5	2	9	9	9	9	9	10	80.1	71.3	37.497	356	356	0	322.01	27.5	28.7	18.3	59.6	56.2	59.6	56.2	60.7	62.9	16662000000	139300000	148180000	106200000	3258100000	2798900000	1969900000	3327300000
Q8IWE2	Q8IWE2	Protein NOXP20	FAM114A1	sp|Q8IWE2|NXP20_HUMAN Protein NOXP20 OS=Homo sapiens OX=9606 GN=FAM114A1 PE=1 SV=2	1	13	13	0	1	0	10	8	7	10	10	9	0	1	0	10	8	7	10	10	9	41	41	60.741	563	563	0	320.44	0	3.9	0	31.6	23.6	24.9	33.2	32.3	30.9	4916100000	0	1657800	0	881550000	678630000	350100000	853010000
P13639	P13639	Elongation factor 2	EEF2	sp|P13639|EF2_HUMAN Elongation factor 2 OS=Homo sapiens OX=9606 GN=EEF2 PE=1 SV=4	1	47	46	25	18	22	38	36	35	36	36	38	24	18	21	38	36	35	36	36	38	57	55.8	95.337	858	858	0	319.23	36	28.6	29.4	47.3	42.5	45.5	43.1	45.6	49.7	75605000000	951290000	420780000	838180000	11683000000	9945400000	8090200000	17273000000
P61978;Q5T6W2;S4R457;S4R359	P61978;Q5T6W2	Heterogeneous nuclear ribonucleoprotein K	HNRNPK	sp|P61978|HNRPK_HUMAN Heterogeneous nuclear ribonucleoprotein K OS=Homo sapiens OX=9606 GN=HNRNPK PE=1 SV=1;tr|Q5T6W2|Q5T6W2_HUMAN Heterogeneous nuclear ribonucleoprotein K (Fragment) OS=Homo sapiens OX=9606 GN=HNRNPK PE=1 SV=1	4	20	20	9	10	10	17	12	14	13	14	11	9	10	10	17	12	14	13	14	11	60.3	60.3	50.976	463	463;379;77;100	0	315.57	31.5	32.4	35.2	51	40.2	47.9	40.4	44.7	45.1	26889000000	157660000	243990000	250190000	4680400000	3970700000	2994000000	5050100000
P11142;E9PKE3;E9PNE6;E9PN89;A8K7Q2;E9PLF4;E9PQQ4;E9PQK7;E9PK54;E9PPY6;E9PI65;E9PN25;E9PS65;P54652;E9PM13	P11142;E9PKE3;E9PNE6;E9PN89;A8K7Q2	Heat shock cognate 71 kDa protein	HSPA8	sp|P11142|HSP7C_HUMAN Heat shock cognate 71 kDa protein OS=Homo sapiens OX=9606 GN=HSPA8 PE=1 SV=1;tr|E9PKE3|E9PKE3_HUMAN Heat shock cognate 71 kDa protein OS=Homo sapiens OX=9606 GN=HSPA8 PE=1 SV=1;tr|E9PNE6|E9PNE6_HUMAN Heat shock cognate 71 kDa protein	15	32	29	21	16	18	27	25	29	28	25	26	19	14	16	24	22	26	25	22	23	55.1	51.7	70.897	646	646;627;500;312;410;187;171;178;183;137;168;132;223;639;150	0	314.35	39.6	34.2	35.6	54.8	46.9	48.1	51.5	43.7	46.3	75328000000	957450000	691630000	955480000	10341000000	10323000000	10992000000	15639000000
P56192;H0YHV5;F8VS26;F8W0M7;F8W0S4;F8VZZ9;F5H2V6;H0YIP0;H0YIC2;H0YI94;F8VPL7;H0YHL6;H0YI27	P56192	Methionine--tRNA ligase, cytoplasmic	MARS	sp|P56192|SYMC_HUMAN Methionine--tRNA ligase, cytoplasmic OS=Homo sapiens OX=9606 GN=MARS1 PE=1 SV=2	13	36	36	0	1	0	31	29	31	26	29	30	0	1	0	31	29	31	26	29	30	43.3	43.3	101.11	900	900;233;71;95;110;114;140;219;58;119;60;81;124	0	312.66	0	1.3	0	43	40.8	43.3	40	42.7	42.3	24205000000	0	4608700	0	4094500000	3452500000	2912000000	4144800000
A0A0A0MS51;A0A0A0MT01;P06396;A0A0U1RQL8	A0A0A0MS51;A0A0A0MT01;P06396	Gelsolin	GSN	tr|A0A0A0MS51|A0A0A0MS51_HUMAN Gelsolin OS=Homo sapiens OX=9606 GN=GSN PE=1 SV=1;tr|A0A0A0MT01|A0A0A0MT01_HUMAN Gelsolin OS=Homo sapiens OX=9606 GN=GSN PE=1 SV=1;sp|P06396|GELS_HUMAN Gelsolin OS=Homo sapiens OX=9606 GN=GSN PE=1 SV=1	4	27	16	7	5	5	22	21	24	22	25	21	5	3	4	15	14	15	14	16	13	45.7	30.5	82.525	748	748;767;782;232	0	311.52	14.8	10.2	10.6	39.6	39.6	45.6	39.4	45.3	44.1	41510000000	68150000	71914000	113720000	7162600000	5995300000	5256700000	6719500000
P68371	P68371	Tubulin beta-4B chain	TUBB4B	sp|P68371|TBB4B_HUMAN Tubulin beta-4B chain OS=Homo sapiens OX=9606 GN=TUBB4B PE=1 SV=1	1	30	1	20	17	19	27	28	28	29	28	30	1	1	1	1	1	1	1	1	1	75.7	2.7	49.83	445	445	0	309.46	58.9	55.1	58.7	73.9	73.7	75.7	73.9	75.7	75.7	162120000000	884020000	657870000	879960000	28313000000	23532000000	21550000000	28020000000
P23634	P23634	Plasma membrane calcium-transporting ATPase 4	ATP2B4	sp|P23634|AT2B4_HUMAN Plasma membrane calcium-transporting ATPase 4 OS=Homo sapiens OX=9606 GN=ATP2B4 PE=1 SV=2	1	27	15	6	7	8	18	16	16	18	19	19	1	2	2	10	9	7	10	11	9	26.9	16.6	137.92	1241	1241	0	308.12	7.7	8.4	9.5	20.7	17.2	17.8	21	20.6	21.2	10155000000	48594000	89170000	64309000	1278200000	1085200000	1106200000	1883100000
P40855;Q5QNY5;B7Z8B3;E9PS71;H0YJ60;H0YDY4;E9PPB4	P40855;Q5QNY5;B7Z8B3	Peroxisomal biogenesis factor 19	PEX19	sp|P40855|PEX19_HUMAN Peroxisomal biogenesis factor 19 OS=Homo sapiens OX=9606 GN=PEX19 PE=1 SV=1;tr|Q5QNY5|Q5QNY5_HUMAN Peroxisomal biogenesis factor 19 (Fragment) OS=Homo sapiens OX=9606 GN=PEX19 PE=1 SV=1;tr|B7Z8B3|B7Z8B3_HUMAN Peroxisomal biogenesis fa	7	12	12	0	0	0	9	10	8	9	12	9	0	0	0	9	10	8	9	12	9	49.2	49.2	32.806	299	299;235;186;166;304;119;40	0	304.83	0	0	0	39.1	44.1	36.1	39.1	49.2	39.1	4515000000	0	0	0	743090000	590420000	590880000	708040000
P46940;A0A0J9YXZ5;H0YLE8;H0YKA5;A0A087WWP1;A0A087X225;E9PDT6	P46940;A0A0J9YXZ5;H0YLE8	Ras GTPase-activating-like protein IQGAP1	IQGAP1	sp|P46940|IQGA1_HUMAN Ras GTPase-activating-like protein IQGAP1 OS=Homo sapiens OX=9606 GN=IQGAP1 PE=1 SV=1;tr|A0A0J9YXZ5|A0A0J9YXZ5_HUMAN Ras GTPase-activating-like protein IQGAP1 OS=Homo sapiens OX=9606 GN=IQGAP1 PE=1 SV=1;tr|H0YLE8|H0YLE8_HUMAN Ras GTPa	7	61	59	10	14	7	40	36	35	41	41	40	10	13	7	40	35	35	40	40	39	49.8	48.8	189.25	1657	1657;1191;1085;43;107;48;509	0	304.41	9.4	12.9	6.3	36.5	29.7	28.9	34.7	33.3	37.8	14034000000	70208000	52227000	67587000	2306600000	1443500000	1429500000	2750800000
P00558;P07205	P00558	Phosphoglycerate kinase 1	PGK1	sp|P00558|PGK1_HUMAN Phosphoglycerate kinase 1 OS=Homo sapiens OX=9606 GN=PGK1 PE=1 SV=3	2	23	23	14	12	12	22	19	18	21	20	18	14	12	12	22	19	18	21	20	18	66.4	66.4	44.614	417	417;417	0	302.2	48.7	41	39.6	62.6	55.6	59.2	62.6	60	60.2	45212000000	684890000	377840000	687750000	6163100000	6166900000	4864600000	9796600000
P06576;H0YH81;F8W079;F8W0P7;H0YI37	P06576;H0YH81;F8W079	ATP synthase subunit beta, mitochondrial;ATP synthase subunit beta	ATP5B	sp|P06576|ATPB_HUMAN ATP synthase subunit beta, mitochondrial OS=Homo sapiens OX=9606 GN=ATP5F1B PE=1 SV=3;tr|H0YH81|H0YH81_HUMAN ATP synthase subunit beta (Fragment) OS=Homo sapiens OX=9606 GN=ATP5F1B PE=1 SV=1;tr|F8W079|F8W079_HUMAN ATP synthase subunit	5	24	24	13	14	10	20	18	21	20	20	22	13	14	10	20	18	21	20	20	22	65.2	65.2	56.559	529	529;362;284;270;133	0	297.59	35	40.6	28.9	60.5	49.7	57.7	54.1	60.3	59.5	35376000000	482680000	877790000	484530000	3275000000	3428400000	7531600000	3926500000
P14923;C9JK18;C9JKY1;C9JTX4;C9J826;C9JPI2;K7ERP3	P14923	Junction plakoglobin	JUP	sp|P14923|PLAK_HUMAN Junction plakoglobin OS=Homo sapiens OX=9606 GN=JUP PE=1 SV=3	7	35	31	30	17	23	14	14	19	13	18	17	26	15	20	12	12	18	12	17	16	64.3	59.7	81.744	745	745;295;297;235;276;86;104	0	294.92	60.4	32.2	49.5	31.7	29.8	42	29	38.9	38.1	8305600000	1453000000	504680000	1335000000	722920000	452260000	782280000	584310000
Q9UIA9;E7ESC6;E5RIW1;H0YBE1	Q9UIA9;E7ESC6	Exportin-7	XPO7	sp|Q9UIA9|XPO7_HUMAN Exportin-7 OS=Homo sapiens OX=9606 GN=XPO7 PE=1 SV=3;tr|E7ESC6|E7ESC6_HUMAN Exportin-7 OS=Homo sapiens OX=9606 GN=XPO7 PE=1 SV=1	4	31	31	0	0	0	26	23	19	19	22	22	0	0	0	26	23	19	19	22	22	36.4	36.4	123.91	1087	1087;1088;237;190	0	293.44	0	0	0	30.9	30.2	24.6	24.4	27.9	29.9	12050000000	0	0	0	1770400000	2001700000	1150100000	1902000000
Q14974;J3KTM9;J3QR48;J3QKQ5;J3QRG4	Q14974;J3KTM9	Importin subunit beta-1	KPNB1	sp|Q14974|IMB1_HUMAN Importin subunit beta-1 OS=Homo sapiens OX=9606 GN=KPNB1 PE=1 SV=2;tr|J3KTM9|J3KTM9_HUMAN Importin subunit beta-1 (Fragment) OS=Homo sapiens OX=9606 GN=KPNB1 PE=1 SV=1	5	32	32	4	6	6	30	28	26	28	28	26	4	6	6	30	28	26	28	28	26	43.7	43.7	97.169	876	876;690;148;248;60	0	292.72	6.8	10.6	9.2	40.9	38.8	36	40.6	39.4	37	120970000000	63925000	77156000	103070000	17194000000	16801000000	12560000000	26231000000
Q5QNZ2;P24539	Q5QNZ2;P24539	ATP synthase F(0) complex subunit B1, mitochondrial	ATP5F1	tr|Q5QNZ2|Q5QNZ2_HUMAN ATP synthase F(0) complex subunit B1, mitochondrial OS=Homo sapiens OX=9606 GN=ATP5PB PE=1 SV=1;sp|P24539|AT5F1_HUMAN ATP synthase F(0) complex subunit B1, mitochondrial OS=Homo sapiens OX=9606 GN=ATP5PB PE=1 SV=2	2	8	8	1	1	1	8	6	7	6	6	6	1	1	1	8	6	7	6	6	6	48.7	48.7	22.275	195	195;256	0	290.57	8.7	8.7	8.7	48.7	40.5	40.5	40.5	40.5	40.5	5776900000	4803900	0	2939000	781560000	695150000	710880000	1137400000
P22314;Q5JRR6;Q5JRR9;Q5JRS0;Q5JRS1;Q5JRS3;Q5JRS2	P22314	Ubiquitin-like modifier-activating enzyme 1	UBA1	sp|P22314|UBA1_HUMAN Ubiquitin-like modifier-activating enzyme 1 OS=Homo sapiens OX=9606 GN=UBA1 PE=1 SV=3	7	30	30	14	11	13	24	20	18	22	26	22	14	11	13	24	20	18	22	26	22	40.9	40.9	117.85	1058	1058;506;270;284;173;195;234	0	290.51	20.3	14.3	18.1	33.1	27.7	27	32.2	36.3	32.8	14473000000	232860000	74161000	150750000	2546200000	1988800000	1161200000	3184600000
P26038;V9GZ54	P26038	Moesin	MSN	sp|P26038|MOES_HUMAN Moesin OS=Homo sapiens OX=9606 GN=MSN PE=1 SV=3	2	31	23	7	7	8	21	18	18	17	21	17	6	5	6	16	13	14	12	14	12	53.9	38.8	67.819	577	577;103	0	288.96	17.5	14.7	18	36.9	35	34.3	32.9	41.6	38.8	15288000000	108130000	88218000	87177000	2513800000	1825800000	1202100000	2951800000
P02545;H0YAB0;A0A0C4DGC5	P02545	Prelamin-A/C;Lamin-A/C	LMNA	sp|P02545|LMNA_HUMAN Prelamin-A/C OS=Homo sapiens OX=9606 GN=LMNA PE=1 SV=1	3	30	2	14	12	9	23	20	16	20	20	18	2	2	2	2	2	1	2	2	2	51.1	6.6	74.139	664	664;182;260	0	288.33	29.2	26.4	20.5	42	39.2	31.9	37.8	37.8	37.7	17294000000	125320000	125350000	63006000	2881600000	2813200000	2137300000	3604100000
O60664;K7ERZ3;K7EL96;K7ER39;K7EJD0	O60664;K7ERZ3	Perilipin-3	PLIN3	sp|O60664|PLIN3_HUMAN Perilipin-3 OS=Homo sapiens OX=9606 GN=PLIN3 PE=1 SV=3;tr|K7ERZ3|K7ERZ3_HUMAN Perilipin-3 (Fragment) OS=Homo sapiens OX=9606 GN=PLIN3 PE=1 SV=1	5	18	18	4	4	5	15	13	12	15	16	16	4	4	5	15	13	12	15	16	16	70.7	70.7	47.074	434	434;292;172;168;35	0	285.24	13.4	13.4	18.4	60.4	53.2	47	58.5	65.4	61.1	19644000000	32322000	23521000	41866000	2470900000	2354100000	1490800000	4117400000
Q9BQE3;F5H5D3;A0A1W2PQM2	Q9BQE3;F5H5D3;A0A1W2PQM2	Tubulin alpha-1C chain	TUBA1C	sp|Q9BQE3|TBA1C_HUMAN Tubulin alpha-1C chain OS=Homo sapiens OX=9606 GN=TUBA1C PE=1 SV=1;tr|F5H5D3|F5H5D3_HUMAN Tubulin alpha chain OS=Homo sapiens OX=9606 GN=TUBA1C PE=1 SV=1;tr|A0A1W2PQM2|A0A1W2PQM2_HUMAN Tubulin alpha-1C chain OS=Homo sapiens OX=9606 GN	3	36	3	17	13	16	26	25	29	26	27	33	2	2	2	3	2	3	2	3	3	86.9	15.1	49.895	449	449;519;325	0	284.13	56.1	45	54.1	67.9	61.7	75.7	60.8	75.7	84.6	16072000000	21010000	2908500	23289000	2483100000	1819300000	1509600000	2972200000
P07237;H7BZ94;I3L398;H0Y3Z3;I3L312;I3L4M2;I3NI03;I3L3U6;I3L0S0;I3L3P5;I3L1Y5;I3L514	P07237;H7BZ94;I3L398;H0Y3Z3	Protein disulfide-isomerase	P4HB	sp|P07237|PDIA1_HUMAN Protein disulfide-isomerase OS=Homo sapiens OX=9606 GN=P4HB PE=1 SV=3;tr|H7BZ94|H7BZ94_HUMAN Protein disulfide-isomerase OS=Homo sapiens OX=9606 GN=P4HB PE=1 SV=2;tr|I3L398|I3L398_HUMAN Protein disulfide-isomerase (Fragment) OS=Homo s	12	18	18	6	5	7	13	13	13	12	12	12	6	5	7	13	13	13	12	12	12	44.3	44.3	57.116	508	508;464;200;274;208;117;166;188;148;156;54;106	0	284.11	14.8	11.8	18.1	31.1	31.1	33.9	32.7	30.9	30.1	11542000000	82980000	83609000	104870000	1726100000	1637300000	1217800000	1823600000
P50454;E9PPV6;E9PR70;E9PKH2;E9PK86;E9PMI5;E9PNX1;E9PQ34;E9PJH8;E9PIG2;E9PRS3;H0YEP8;E9PLA6	P50454;E9PPV6;E9PR70;E9PKH2;E9PK86;E9PMI5	Serpin H1	SERPINH1	sp|P50454|SERPH_HUMAN Serpin H1 OS=Homo sapiens OX=9606 GN=SERPINH1 PE=1 SV=2;tr|E9PPV6|E9PPV6_HUMAN Serpin H1 OS=Homo sapiens OX=9606 GN=SERPINH1 PE=1 SV=1;tr|E9PR70|E9PR70_HUMAN Serpin H1 (Fragment) OS=Homo sapiens OX=9606 GN=SERPINH1 PE=1 SV=1;tr|E9PKH2	13	22	22	10	7	9	20	17	16	18	19	16	10	7	9	20	17	16	18	19	16	46.7	46.7	46.44	418	418;324;295;201;247;249;203;142;150;165;166;56;85	0	283.3	27	18.4	26.1	43.5	37.1	44.5	41.9	43.3	43.5	33385000000	362450000	157030000	354810000	5035300000	4480900000	3630500000	5964100000
P14625;Q96GW1;A0A1W2PRR1;H0YIV0;F8W026;Q58FF3	P14625	Endoplasmin	HSP90B1	sp|P14625|ENPL_HUMAN Endoplasmin OS=Homo sapiens OX=9606 GN=HSP90B1 PE=1 SV=1	6	40	38	17	15	15	33	25	27	23	25	31	15	13	13	31	23	25	21	23	29	51.8	50.1	92.468	803	803;315;315;147;48;399	0	282.7	25.5	19.4	24.7	45.8	34.6	42.1	32	38	42.1	26485000000	463330000	357060000	498170000	4108800000	3451300000	2821100000	4006700000
F2Z2X4;Q9C0E2	F2Z2X4;Q9C0E2	Exportin-4	XPO4	tr|F2Z2X4|F2Z2X4_HUMAN Exportin-4 OS=Homo sapiens OX=9606 GN=XPO4 PE=1 SV=1;sp|Q9C0E2|XPO4_HUMAN Exportin-4 OS=Homo sapiens OX=9606 GN=XPO4 PE=1 SV=2	2	27	27	0	0	0	19	18	14	17	20	19	0	0	0	19	18	14	17	20	19	32.8	32.8	130.15	1151	1151;1151	0	280.13	0	0	0	21.9	21	16.4	21.4	21.8	25.3	7444100000	0	0	0	1119000000	1023200000	728370000	1539000000
P61247;D6RG13;D6RAT0;D6RB09;E9PFI5;H0Y8L7;H0Y9Y4;D6RAS7;D6R9B6;D6RED7;D6RI02;D6RGE0	P61247;D6RG13;D6RAT0;D6RB09;E9PFI5;H0Y8L7;H0Y9Y4;D6RAS7;D6R9B6	40S ribosomal protein S3a	RPS3A	sp|P61247|RS3A_HUMAN 40S ribosomal protein S3a OS=Homo sapiens OX=9606 GN=RPS3A PE=1 SV=2;tr|D6RG13|D6RG13_HUMAN 40S ribosomal protein S3a (Fragment) OS=Homo sapiens OX=9606 GN=RPS3A PE=1 SV=1;tr|D6RAT0|D6RAT0_HUMAN 40S ribosomal protein S3a OS=Homo sapien	12	16	16	5	4	5	13	9	9	10	12	11	5	4	5	13	9	9	10	12	11	57.6	57.6	29.945	264	264;223;227;193;205;190;208;125;145;101;95;65	0	278.48	22.7	15.9	19.3	50.4	34.5	36.7	40.9	44.7	42	20029000000	192070000	258510000	188770000	3449500000	2183400000	1891000000	3800400000
P07814;V9GYZ6;V9GZ76	P07814;V9GYZ6	Bifunctional glutamate/proline--tRNA ligase;Glutamate--tRNA ligase;Proline--tRNA ligase	EPRS	sp|P07814|SYEP_HUMAN Bifunctional glutamate/proline--tRNA ligase OS=Homo sapiens OX=9606 GN=EPRS1 PE=1 SV=5;tr|V9GYZ6|V9GYZ6_HUMAN Glutamyl-prolyl-tRNA synthetase 1 (Fragment) OS=Homo sapiens OX=9606 GN=EPRS1 PE=1 SV=1	3	47	47	5	5	3	27	29	24	28	29	31	5	5	3	27	29	24	28	29	31	43.8	43.8	170.59	1512	1512;968;194	0	273.84	4.5	3.8	2.4	28.1	30.4	26	30.5	27.1	34.1	10451000000	17519000	27937000	12899000	1465900000	1616900000	1051900000	1877800000
Q16658;C9JPH9;C9JFC0;A0A0A0MSB2	Q16658	Fascin	FSCN1	sp|Q16658|FSCN1_HUMAN Fascin OS=Homo sapiens OX=9606 GN=FSCN1 PE=1 SV=3	4	22	22	8	12	10	15	13	13	18	19	14	8	12	10	15	13	13	18	19	14	57.6	57.6	54.529	493	493;120;132;137	0	273.43	26	37.1	31.2	43.6	41.4	40	52.7	54.4	39.1	23971000000	164220000	193360000	366510000	3587100000	2558000000	2150100000	4660300000
P35613;A0A087X2B5;A0A087WUV8;I3L192;R4GMX5;R4GN83;A0A2R8YDZ0	P35613;A0A087X2B5;A0A087WUV8;I3L192	Basigin	BSG	sp|P35613|BASI_HUMAN Basigin OS=Homo sapiens OX=9606 GN=BSG PE=1 SV=2;tr|A0A087X2B5|A0A087X2B5_HUMAN Basigin (Fragment) OS=Homo sapiens OX=9606 GN=BSG PE=1 SV=1;tr|A0A087WUV8|A0A087WUV8_HUMAN Basigin OS=Homo sapiens OX=9606 GN=BSG PE=1 SV=1;tr|I3L192|I3L19	7	10	10	0	0	0	9	7	8	9	9	9	0	0	0	9	7	8	9	9	9	34.8	34.8	42.2	385	385;221;189;160;84;52;132	0	267.75	0	0	0	34.5	28.8	31.4	32.5	32.5	32.5	19687000000	0	0	0	2423400000	2485100000	1817100000	4339400000
P00338;F5GXY2;F5GYU2;F5GXH2;F5H5J4;F5H6W8;F5GZQ4;F5H8H6;F5GXC7;F5GWW2;F5GXU1	P00338;F5GXY2;F5GYU2	L-lactate dehydrogenase A chain	LDHA	sp|P00338|LDHA_HUMAN L-lactate dehydrogenase A chain OS=Homo sapiens OX=9606 GN=LDHA PE=1 SV=2;tr|F5GXY2|F5GXY2_HUMAN L-lactate dehydrogenase A chain (Fragment) OS=Homo sapiens OX=9606 GN=LDHA PE=1 SV=8;tr|F5GYU2|F5GYU2_HUMAN L-lactate dehydrogenase A chai	11	21	19	12	9	11	16	15	15	18	15	18	11	8	10	15	14	14	16	14	17	65.4	59.9	36.688	332	332;156;144;114;89;94;72;42;45;45;46	0	266.56	34	22.6	30.4	43.4	37.3	44.9	49.7	37.3	57.5	78154000000	819430000	732020000	693960000	11336000000	9415100000	8958800000	15695000000
P36578;H3BM89;H3BTP7;H3BU31	P36578;H3BM89	60S ribosomal protein L4	RPL4	sp|P36578|RL4_HUMAN 60S ribosomal protein L4 OS=Homo sapiens OX=9606 GN=RPL4 PE=1 SV=5;tr|H3BM89|H3BM89_HUMAN 60S ribosomal protein L4 OS=Homo sapiens OX=9606 GN=RPL4 PE=1 SV=1	4	27	27	21	20	21	21	20	19	20	20	22	21	20	21	21	20	19	20	20	22	51.1	51.1	47.697	427	427;333;170;171	0	262	43.6	41.5	43.6	45.4	39.6	39.6	40.3	40.3	40.5	46977000000	1756600000	1605600000	2596100000	5946500000	6659800000	4607600000	7370100000
P17655	P17655	Calpain-2 catalytic subunit	CAPN2	sp|P17655|CAN2_HUMAN Calpain-2 catalytic subunit OS=Homo sapiens OX=9606 GN=CAPN2 PE=1 SV=6	1	21	21	7	5	5	13	15	12	13	14	18	7	5	5	13	15	12	13	14	18	43	43	79.994	700	700	0	255.11	16.9	11.4	12.4	28.9	33.6	26.7	24.9	29.3	37.4	10181000000	88104000	38684000	77033000	1403600000	1422200000	788820000	2277000000
Q9Y678;H0Y8X7;D6RG17;H0Y8G2	Q9Y678	Coatomer subunit gamma-1	COPG1	sp|Q9Y678|COPG1_HUMAN Coatomer subunit gamma-1 OS=Homo sapiens OX=9606 GN=COPG1 PE=1 SV=1	4	28	26	3	3	2	18	16	13	20	20	15	3	3	2	17	14	12	18	18	14	48.7	45.9	97.717	874	874;188;49;76	0	254.79	4.7	3.4	3.1	30.7	27.2	22.9	34.7	32.4	28.9	8320200000	19202000	22396000	23376000	1299200000	1246800000	609110000	1900000000
P0DP25;P0DP24;P0DP23;A0A590UK56;E7EMB3;Q96HY3;G3V361;A0A590UJI2;M0QZ52;A0A590UJC0;F8WBR5;G3V226;G3V479;P27482	P0DP25;P0DP24;P0DP23;A0A590UK56;E7EMB3;Q96HY3;G3V361;A0A590UJI2		CALM2;CALM1	sp|P0DP25|CALM3_HUMAN Calmodulin-3 OS=Homo sapiens OX=9606 GN=CALM3 PE=1 SV=1;sp|P0DP24|CALM2_HUMAN Calmodulin-2 OS=Homo sapiens OX=9606 GN=CALM2 PE=1 SV=1;sp|P0DP23|CALM1_HUMAN Calmodulin-1 OS=Homo sapiens OX=9606 GN=CALM1 PE=1 SV=1;tr|A0A590UK56|A0A590UK	14	10	10	0	2	1	7	8	7	9	9	8	0	2	1	7	8	7	9	9	8	87.9	87.9	16.837	149	149;149;149;150;196;113;98;104;83;59;65;76;83;149	0	253.77	0	14.1	8.7	55.7	55.7	55.7	87.9	63.1	63.1	211570000000	0	46581000	18127000	31142000000	23601000000	27547000000	47245000000
A0A286YF22;O43175;A0A2C9F2M7;A0A286YFA2;A0A286YFL2;A0A286YFM8;A0A286YFC8;A0A286YFB2;A0A286YER3;A0A286YF34;A0A286YF78;A0A286YFF3;A0A286YFK5;A0A286YFE1	A0A286YF22;O43175;A0A2C9F2M7;A0A286YFA2;A0A286YFL2;A0A286YFM8	D-3-phosphoglycerate dehydrogenase	PHGDH	tr|A0A286YF22|A0A286YF22_HUMAN D-3-phosphoglycerate dehydrogenase OS=Homo sapiens OX=9606 GN=PHGDH PE=1 SV=1;sp|O43175|SERA_HUMAN D-3-phosphoglycerate dehydrogenase OS=Homo sapiens OX=9606 GN=PHGDH PE=1 SV=4;tr|A0A2C9F2M7|A0A2C9F2M7_HUMAN D-3-phosphoglycer	14	23	23	8	5	5	19	18	17	18	18	17	8	5	5	19	18	17	18	18	17	52.1	52.1	55.938	526	526;533;532;445;429;239;123;165;97;72;276;63;145;89	0	252.44	18.8	11	13.3	43.5	40.9	38.4	39.7	43.5	35	24225000000	68310000	41295000	39598000	3765500000	3507100000	2871400000	5103100000
P42704;A0A0C4DG06;B8ZZ38;C9JCA9;H7C3W8	P42704	Leucine-rich PPR motif-containing protein, mitochondrial	LRPPRC	sp|P42704|LPPRC_HUMAN Leucine-rich PPR motif-containing protein, mitochondrial OS=Homo sapiens OX=9606 GN=LRPPRC PE=1 SV=3	5	58	58	7	5	4	37	27	25	33	38	37	7	5	4	37	27	25	33	38	37	49.3	49.3	157.9	1394	1394;531;504;359;77	0	248.84	5.6	4.2	3.9	33.6	25.6	24.5	31.9	33.6	37.9	14613000000	13362000	17311000	12289000	1994000000	1416400000	979410000	3074200000
P04083;Q5T3N1;Q5T3N0	P04083	Annexin A1	ANXA1	sp|P04083|ANXA1_HUMAN Annexin A1 OS=Homo sapiens OX=9606 GN=ANXA1 PE=1 SV=2	3	23	23	9	10	5	18	20	17	19	20	18	9	10	5	18	20	17	19	20	18	65.3	65.3	38.714	346	346;204;115	0	248.6	34.7	37.3	21.7	56.9	60.4	58.1	55.8	60.4	60.7	20529000000	302980000	165150000	129180000	3136500000	2664200000	1878400000	4644300000
Q86VS8;H0YE69;H0YDM4	Q86VS8	Protein Hook homolog 3	HOOK3	sp|Q86VS8|HOOK3_HUMAN Protein Hook homolog 3 OS=Homo sapiens OX=9606 GN=HOOK3 PE=1 SV=2	3	26	26	0	0	0	22	15	16	20	20	16	0	0	0	22	15	16	20	20	16	48.9	48.9	83.125	718	718;101;161	0	246.43	0	0	0	46	30.2	31.8	37.3	33.1	31.2	9211200000	0	0	0	1465200000	976270000	1156000000	1561300000
P07900;G3V2J8;Q14568;Q58FG0;Q58FG1	P07900	Heat shock protein HSP 90-alpha	HSP90AA1	sp|P07900|HS90A_HUMAN Heat shock protein HSP 90-alpha OS=Homo sapiens OX=9606 GN=HSP90AA1 PE=1 SV=5	5	39	21	17	15	14	30	25	30	27	32	30	7	5	6	15	12	15	13	17	19	50.7	32.7	84.659	732	732;174;343;334;418	0	243.56	27.9	26.4	25	40.6	34.4	43	40.8	44.7	45.9	19943000000	165610000	79754000	116320000	2473900000	2096800000	2218700000	4613300000
A0A0A0MS45;J3KNI1;Q9H9E3;H3BMV9;H3BSD2;H3BQB2;J3KRB5;E9PRT5;J3QLW1	A0A0A0MS45;J3KNI1;Q9H9E3	Conserved oligomeric Golgi complex subunit 4	COG4	tr|A0A0A0MS45|A0A0A0MS45_HUMAN Conserved oligomeric Golgi complex subunit 4 OS=Homo sapiens OX=9606 GN=COG4 PE=1 SV=1;tr|J3KNI1|J3KNI1_HUMAN Conserved oligomeric Golgi complex subunit 4 OS=Homo sapiens OX=9606 GN=COG4 PE=1 SV=1;sp|Q9H9E3|COG4_HUMAN Conserv	9	23	23	0	0	0	17	15	13	16	18	14	0	0	0	17	15	13	16	18	14	38.9	38.9	87.183	768	768;789;785;193;130;143;157;100;72	0	242.37	0	0	0	29.8	27	22.9	26.3	30.3	26.3	5690500000	0	0	0	864800000	828120000	544090000	1107300000
P46821;D6RA32;D6RA40;D6RCL2;D6RGJ3	P46821;D6RA32	Microtubule-associated protein 1B;MAP1B heavy chain;MAP1 light chain LC1	MAP1B	sp|P46821|MAP1B_HUMAN Microtubule-associated protein 1B OS=Homo sapiens OX=9606 GN=MAP1B PE=1 SV=2;tr|D6RA32|D6RA32_HUMAN Microtubule-associated protein 1B (Fragment) OS=Homo sapiens OX=9606 GN=MAP1B PE=1 SV=2	5	27	24	2	2	2	19	15	14	16	20	15	2	1	2	18	14	14	15	18	14	16.9	15.9	270.63	2468	2468;670;569;103;122	0	239.9	1.6	1.3	1.3	12.1	11	9.5	11.6	13.2	10.6	3966200000	5172100	1745600	14065000	714170000	556020000	361220000	669900000
D6RGI3;D6RER5;Q9NVA2;D6RDU5;H0Y961;H0Y9G8;D6RDP1;D6R9Y6;E7EW69;E7EX04;B5ME97;Q9P0V9	D6RGI3;D6RER5;Q9NVA2;D6RDU5	Septin-11	SEPT11	tr|D6RGI3|D6RGI3_HUMAN Septin 11, isoform CRA_b OS=Homo sapiens OX=9606 GN=SEPTIN11 PE=1 SV=1;tr|D6RER5|D6RER5_HUMAN Septin-11 OS=Homo sapiens OX=9606 GN=SEPTIN11 PE=1 SV=1;sp|Q9NVA2|SEP11_HUMAN Septin-11 OS=Homo sapiens OX=9606 GN=SEPTIN11 PE=1 SV=3;tr|D6	12	17	11	4	5	6	16	15	15	15	16	11	4	4	6	10	11	10	10	10	7	48.5	29.6	49.005	425	425;432;429;372;160;82;126;136;450;473;544;454	0	239.16	12.7	15.1	18.1	48.2	44.2	43.1	44.2	48.5	35.3	7476800000	32317000	55805000	66034000	1369500000	1085000000	829690000	1445500000
P68032	P68032	Actin, alpha cardiac muscle 1	ACTC1	sp|P68032|ACTC_HUMAN Actin, alpha cardiac muscle 1 OS=Homo sapiens OX=9606 GN=ACTC1 PE=1 SV=1	1	29	0	10	9	9	21	24	23	25	22	27	0	0	0	0	0	0	0	0	0	72.4	0	42.019	377	377	0	236.81	31.3	28.6	27.1	66	63.7	68.2	68.7	68.4	71.6	94223000000	872450000	238010000	898220000	13134000000	12850000000	11077000000	18865000000
P13489;H0YCR7;E9PMJ3;E9PLZ3;E9PIM9;E9PIK5;E9PMN0;E9PMA9;E9PR82;E9PMI1	P13489	Ribonuclease inhibitor	RNH1	sp|P13489|RINI_HUMAN Ribonuclease inhibitor OS=Homo sapiens OX=9606 GN=RNH1 PE=1 SV=2	10	19	19	6	3	2	16	14	17	15	15	14	6	3	2	16	14	17	15	15	14	64.4	64.4	49.973	461	461;285;189;194;199;181;168;77;35;40	0	234.88	20.6	8.5	5.2	58.6	47.7	59.4	54.4	54.4	51.6	8507900000	43991000	28643000	19093000	1428500000	1246600000	741020000	1858600000
P12111;E7ENL6;C9JNG9;I3L392	P12111;E7ENL6	Collagen alpha-3(VI) chain	COL6A3	sp|P12111|CO6A3_HUMAN Collagen alpha-3(VI) chain OS=Homo sapiens OX=9606 GN=COL6A3 PE=1 SV=5;tr|E7ENL6|E7ENL6_HUMAN Collagen alpha-3(VI) chain OS=Homo sapiens OX=9606 GN=COL6A3 PE=1 SV=2	4	62	62	5	5	0	34	28	27	37	40	35	5	5	0	34	28	27	37	40	35	26.1	26.1	343.67	3177	3177;2569;708;173	0	233.34	1.5	1.8	0	15.5	11.5	11.8	15.8	16.2	16.7	6212500000	12857000	5404800	0	1042900000	736280000	633990000	1291600000
O75083;D6RD66	O75083	WD repeat-containing protein 1	WDR1	sp|O75083|WDR1_HUMAN WD repeat-containing protein 1 OS=Homo sapiens OX=9606 GN=WDR1 PE=1 SV=4	2	21	21	6	7	6	15	15	14	13	15	17	6	7	6	15	15	14	13	15	17	56.8	56.8	66.193	606	606;245	0	233.27	16.3	18.2	19.5	45.5	41.9	41.9	36	43.6	50.3	14738000000	56421000	55710000	78138000	2355100000	1564000000	1103200000	3223600000
P36507;G5E9C7;M0R1B6	P36507;G5E9C7	Dual specificity mitogen-activated protein kinase kinase 2	MAP2K2	sp|P36507|MP2K2_HUMAN Dual specificity mitogen-activated protein kinase kinase 2 OS=Homo sapiens OX=9606 GN=MAP2K2 PE=1 SV=1;tr|G5E9C7|G5E9C7_HUMAN Dual-specificity mitogen-activated protein kinase kinase 2 OS=Homo sapiens OX=9606 GN=MAP2K2 PE=1 SV=1	3	19	6	1	1	1	6	4	4	12	15	15	0	0	0	3	2	2	5	5	5	51.2	23.8	44.424	400	400;303;104	0	231.63	2.8	3	2.8	23	18.8	15	39	46	45.8	4455600000	2217200	0	4028200	274390000	137610000	72407000	1192100000
P50395;Q5SX87;Q5SX91;V9GYJ7;V9GYF8;Q5SX90;Q5SX86	P50395	Rab GDP dissociation inhibitor beta	GDI2	sp|P50395|GDIB_HUMAN Rab GDP dissociation inhibitor beta OS=Homo sapiens OX=9606 GN=GDI2 PE=1 SV=2	7	30	21	9	7	7	20	20	18	19	21	23	5	5	4	14	14	11	13	15	15	74.2	52.1	50.663	445	445;263;203;125;130;148;155	0	229.63	27	22.5	21.1	57.5	56.9	56.4	52.8	55.1	68.3	16558000000	162170000	54691000	151780000	2112000000	2253800000	2163900000	3117300000
Q5SRN5;P04439;A0A1W2PS24;Q5SRN7;A0A0G2JIF2;A0A0G2JL56;A0A0G2JI36;A0A1W2PSE7;A0A1W2PQD0;P01893	Q5SRN5;P04439;A0A1W2PS24;Q5SRN7;A0A0G2JIF2;A0A0G2JL56;A0A0G2JI36;A0A1W2PSE7;A0A1W2PQD0	HLA class I histocompatibility antigen, A-3 alpha chain	HLA-A	tr|Q5SRN5|Q5SRN5_HUMAN HLA class I histocompatibility antigen, A alpha chain OS=Homo sapiens OX=9606 GN=HLA-A PE=1 SV=2;sp|P04439|HLAA_HUMAN HLA class I histocompatibility antigen, A alpha chain OS=Homo sapiens OX=9606 GN=HLA-A PE=1 SV=2;tr|A0A1W2PS24|A0A1	10	11	4	2	1	1	8	8	9	9	10	9	0	0	0	3	2	3	3	3	3	41.5	13.7	41.368	371	371;365;325;299;371;394;299;367;339;362	0	229.14	10	6.5	6.5	36.7	35.3	34.5	36.4	41.5	36.4	3693000000	12894000	7343600	8070900	477810000	505380000	376300000	928160000
P40763;G8JLH9;K7EP08	P40763;G8JLH9	Signal transducer and activator of transcription 3;Signal transducer and activator of transcription	STAT3	sp|P40763|STAT3_HUMAN Signal transducer and activator of transcription 3 OS=Homo sapiens OX=9606 GN=STAT3 PE=1 SV=2;tr|G8JLH9|G8JLH9_HUMAN Signal transducer and activator of transcription OS=Homo sapiens OX=9606 GN=STAT3 PE=1 SV=1	3	33	33	0	0	0	23	21	19	21	26	25	0	0	0	23	21	19	21	26	25	58.3	58.3	88.067	770	770;672;84	0	228.87	0	0	0	41.6	36.4	37.3	38.7	46.1	48.4	20060000000	0	0	0	2488300000	2447400000	2459800000	4048200000
P50570;K7ENE7;K7EPK9	P50570	Dynamin-2	DNM2	sp|P50570|DYN2_HUMAN Dynamin-2 OS=Homo sapiens OX=9606 GN=DNM2 PE=1 SV=2	3	41	22	1	3	1	23	22	17	25	27	31	0	0	0	12	12	8	13	15	17	60	41	98.063	870	870;137;50	0	227.69	2.1	3.6	2.1	39.2	35.3	28.3	40.1	43.8	48.5	8422700000	0	20106000	2642200	1136700000	858260000	807740000	1650500000
P06733;A0A2R8Y6G6;K7EM90;A0A2R8YEM5;A0A2R8Y879;K7ERS8;A0A2R8Y798;A0A2R8YEG5;A0A2R8Y6I8	P06733;A0A2R8Y6G6	Alpha-enolase	ENO1	sp|P06733|ENOA_HUMAN Alpha-enolase OS=Homo sapiens OX=9606 GN=ENO1 PE=1 SV=2;tr|A0A2R8Y6G6|A0A2R8Y6G6_HUMAN Alpha-enolase OS=Homo sapiens OX=9606 GN=ENO1 PE=1 SV=1	9	30	28	17	16	16	24	23	22	22	23	23	15	14	14	22	21	20	20	21	21	70.7	67.3	47.168	434	434;434;195;171;125;83;70;101;33	0	227.18	54.8	44.9	55.8	61.5	64.3	62	64.1	63.1	63.8	47975000000	985890000	596500000	796100000	7506500000	7524100000	5353300000	10254000000
P55072;C9JUP7;C9IZA5	P55072	Transitional endoplasmic reticulum ATPase	VCP	sp|P55072|TERA_HUMAN Transitional endoplasmic reticulum ATPase OS=Homo sapiens OX=9606 GN=VCP PE=1 SV=4	3	30	30	14	10	10	26	23	21	27	25	23	14	10	10	26	23	21	27	25	23	52.6	52.6	89.321	806	806;115;160	0	226.04	23.3	17.2	18.7	47.3	38.8	37	44.8	44.4	38	14410000000	177410000	81780000	185110000	2112900000	1746500000	1439800000	3504400000
Q6P2E9;I3L2F4;I3L0V0;I3L3M2	Q6P2E9	Enhancer of mRNA-decapping protein 4	EDC4	sp|Q6P2E9|EDC4_HUMAN Enhancer of mRNA-decapping protein 4 OS=Homo sapiens OX=9606 GN=EDC4 PE=1 SV=1	4	29	29	0	0	0	19	18	13	19	25	21	0	0	0	19	18	13	19	25	21	35.7	35.7	151.66	1401	1401;135;154;176	0	223.52	0	0	0	23.4	23	16.8	25.1	29.4	25.4	5124100000	0	0	0	728630000	633040000	513100000	1044700000
P11021	P11021	78 kDa glucose-regulated protein	HSPA5	sp|P11021|BIP_HUMAN Endoplasmic reticulum chaperone BiP OS=Homo sapiens OX=9606 GN=HSPA5 PE=1 SV=2	1	31	30	21	19	16	24	22	21	24	24	24	20	18	15	23	21	20	23	23	23	50.5	50.5	72.332	654	654	0	222.53	41.4	34.9	33.8	45.3	39.1	39	42	43.6	43.6	25779000000	665150000	473540000	557440000	3498100000	3214600000	3219600000	5256500000
P48643;B7ZAR1;E9PCA1;E7ENZ3;D6RIZ7	P48643;B7ZAR1;E9PCA1;E7ENZ3	T-complex protein 1 subunit epsilon	CCT5	sp|P48643|TCPE_HUMAN T-complex protein 1 subunit epsilon OS=Homo sapiens OX=9606 GN=CCT5 PE=1 SV=1;tr|B7ZAR1|B7ZAR1_HUMAN T-complex protein 1 subunit epsilon OS=Homo sapiens OX=9606 GN=CCT5 PE=1 SV=1;tr|E9PCA1|E9PCA1_HUMAN T-complex protein 1 subunit epsil	5	28	28	1	2	3	21	16	16	17	22	19	1	2	3	21	16	16	17	22	19	60.1	60.1	59.67	541	541;503;520;486;44	0	221.95	1.8	3	11.1	49.5	45.8	42.7	47.9	54.2	50.8	16041000000	8985300	18191000	45557000	2482700000	2215000000	1450800000	3280800000
P53621;A0A3B3IT15;A0A3B3IS84;A0A3B3ISC6;A0A3B3IU89;A0A3B3ITV3;A0A3B3ITI7;A0A3B3ISK1;A0A3B3IU78;A0A3B3IS23;A0A3B3ITX2	P53621;A0A3B3IT15;A0A3B3IS84;A0A3B3ISC6;A0A3B3IU89	Coatomer subunit alpha;Xenin;Proxenin	COPA	sp|P53621|COPA_HUMAN Coatomer subunit alpha OS=Homo sapiens OX=9606 GN=COPA PE=1 SV=2;tr|A0A3B3IT15|A0A3B3IT15_HUMAN Coatomer subunit alpha OS=Homo sapiens OX=9606 GN=COPA PE=1 SV=1;tr|A0A3B3IS84|A0A3B3IS84_HUMAN Coatomer subunit alpha OS=Homo sapiens OX=9	11	42	42	3	6	6	32	29	31	28	34	33	3	6	6	32	29	31	28	34	33	48.6	48.6	138.34	1224	1224;1204;1204;1024;682;609;452;455;121;134;161	0	219.64	3.4	6.8	6.6	37.1	32.6	36.5	33.4	38.3	40.8	14908000000	34964000	49174000	98940000	2311100000	2001300000	1628200000	2917800000
P21980;A2A299;A2A2A0;A0A087WVS3	P21980	Protein-glutamine gamma-glutamyltransferase 2	TGM2	sp|P21980|TGM2_HUMAN Protein-glutamine gamma-glutamyltransferase 2 OS=Homo sapiens OX=9606 GN=TGM2 PE=1 SV=2	4	19	18	7	5	4	16	14	12	12	13	14	7	5	4	15	14	12	12	13	14	41.8	40.8	77.328	687	687;280;159;721	0	218.08	14	9.2	8.6	36.2	33.5	25.9	27.2	29.1	31.6	6072000000	48014000	24887000	54345000	903060000	863290000	487210000	1344000000
P29401;A0A0B4J1R6;E9PFF2;F8W888	P29401;A0A0B4J1R6	Transketolase	TKT	sp|P29401|TKT_HUMAN Transketolase OS=Homo sapiens OX=9606 GN=TKT PE=1 SV=3;tr|A0A0B4J1R6|A0A0B4J1R6_HUMAN Transketolase OS=Homo sapiens OX=9606 GN=TKT PE=1 SV=1	4	27	27	11	6	8	21	14	17	17	14	19	11	6	8	21	14	17	17	14	19	66.6	66.6	67.877	623	623;457;334;153	0	216.01	26.6	15.9	22.2	49.3	32.1	43	41.6	37.1	57.5	17620000000	324170000	172430000	231530000	2769800000	2421400000	1845600000	3537400000
Q5JP53;P07437;Q5ST81;A6NNZ2	Q5JP53;P07437;Q5ST81	Tubulin beta chain	TUBB	tr|Q5JP53|Q5JP53_HUMAN Tubulin beta chain OS=Homo sapiens OX=9606 GN=TUBB PE=1 SV=1;sp|P07437|TBB5_HUMAN Tubulin beta chain OS=Homo sapiens OX=9606 GN=TUBB PE=1 SV=2;tr|Q5ST81|Q5ST81_HUMAN Tubulin beta chain OS=Homo sapiens OX=9606 GN=TUBB PE=1 SV=1	4	28	6	20	16	18	26	25	27	27	27	28	5	3	4	6	5	6	6	6	6	75.6	17.8	47.766	426	426;444;372;444	0	215.14	64.3	53.5	63.1	73.7	72.5	75.6	73.7	75.6	75.6	219470000000	747020000	515800000	811200000	34411000000	32278000000	28064000000	44883000000
Q9UHG3;F8W8W4;C9K055;C9JM55;C9JGT6	Q9UHG3;F8W8W4	Prenylcysteine oxidase 1	PCYOX1	sp|Q9UHG3|PCYOX_HUMAN Prenylcysteine oxidase 1 OS=Homo sapiens OX=9606 GN=PCYOX1 PE=1 SV=3;tr|F8W8W4|F8W8W4_HUMAN Prenylcysteine oxidase 1 OS=Homo sapiens OX=9606 GN=PCYOX1 PE=1 SV=1	5	22	22	0	0	0	17	19	16	15	19	18	0	0	0	17	19	16	15	19	18	53.9	53.9	56.639	505	505;293;209;154;129	0	213.86	0	0	0	45.1	48.9	46.7	43.2	51.5	47.7	35255000000	0	0	0	4709200000	4385800000	3395600000	6429000000
Q13011;M0R248;M0QZW4	Q13011;M0R248	Delta(3,5)-Delta(2,4)-dienoyl-CoA isomerase, mitochondrial	ECH1	sp|Q13011|ECH1_HUMAN Delta(3,5)-Delta(2,4)-dienoyl-CoA isomerase, mitochondrial OS=Homo sapiens OX=9606 GN=ECH1 PE=1 SV=2;tr|M0R248|M0R248_HUMAN Delta(3,5)-Delta(2,4)-dienoyl-CoA isomerase, mitochondrial (Fragment) OS=Homo sapiens OX=9606 GN=ECH1 PE=1 SV=1	3	15	11	0	0	0	13	11	12	12	13	11	0	0	0	10	9	10	9	10	9	60.4	40.9	35.816	328	328;267;181	0	213.13	0	0	0	53.7	48.8	48.8	52.4	54.6	50.6	22263000000	0	0	0	2985300000	3307000000	2917900000	4529500000
P04075;H3BQN4;J3KPS3;H3BPS8;H3BUH7;H3BR04;H3BMQ8;H3BU78;H3BR68	P04075;H3BQN4;J3KPS3;H3BPS8;H3BUH7;H3BR04;H3BMQ8	Fructose-bisphosphate aldolase A;Fructose-bisphosphate aldolase	ALDOA	sp|P04075|ALDOA_HUMAN Fructose-bisphosphate aldolase A OS=Homo sapiens OX=9606 GN=ALDOA PE=1 SV=2;tr|H3BQN4|H3BQN4_HUMAN Fructose-bisphosphate aldolase OS=Homo sapiens OX=9606 GN=ALDOA PE=1 SV=1;tr|J3KPS3|J3KPS3_HUMAN Fructose-bisphosphate aldolase OS=Homo	9	24	22	11	14	10	19	14	18	18	16	17	10	12	8	17	12	16	16	14	15	74.2	66.5	39.42	364	364;361;368;278;155;162;140;204;130	0	212.87	44	49.2	40.9	69	56.9	66.5	70.9	66.2	64.8	50707000000	595800000	560630000	594840000	7875700000	6133900000	4735200000	11690000000
P50991	P50991	T-complex protein 1 subunit delta	CCT4	sp|P50991|TCPD_HUMAN T-complex protein 1 subunit delta OS=Homo sapiens OX=9606 GN=CCT4 PE=1 SV=4	1	21	21	9	6	5	20	17	14	18	16	12	9	6	5	20	17	14	18	16	12	53.6	53.6	57.924	539	539	0	210.23	29.9	18.9	16.1	53.6	48.1	42.9	48.1	48.1	35.3	12834000000	107730000	53190000	87272000	2135100000	1855300000	1136500000	2927500000
Q9HAV4;H0Y3W3;E2QRM3;H0Y9I3;H0Y3Q8	Q9HAV4	Exportin-5	XPO5	sp|Q9HAV4|XPO5_HUMAN Exportin-5 OS=Homo sapiens OX=9606 GN=XPO5 PE=1 SV=1	5	38	38	0	0	0	26	24	25	22	26	29	0	0	0	26	24	25	22	26	29	39.5	39.5	136.31	1204	1204;253;76;107;24	0	210.18	0	0	0	25.9	28.9	27.8	23.8	26.5	33.9	13305000000	0	0	0	2075700000	1532000000	1497500000	2592100000
P63104;E7EX29;B0AZS6;B7Z2E6;H0YB80;E7ESK7;E5RGE1;E5RIR4;E9PD24;E7EVZ2	P63104;E7EX29;B0AZS6;B7Z2E6;H0YB80	14-3-3 protein zeta/delta	YWHAZ	sp|P63104|1433Z_HUMAN 14-3-3 protein zeta/delta OS=Homo sapiens OX=9606 GN=YWHAZ PE=1 SV=1;tr|E7EX29|E7EX29_HUMAN 14-3-3 protein zeta/delta (Fragment) OS=Homo sapiens OX=9606 GN=YWHAZ PE=1 SV=1;tr|B0AZS6|B0AZS6_HUMAN 14-3-3 protein zeta/delta OS=Homo sapie	10	16	13	10	9	8	13	12	12	13	12	11	9	8	8	10	10	10	10	10	10	67.3	56.3	27.745	245	245;246;168;125;130;137;51;75;92;98	0	209.68	48.6	47.8	48.2	60	56.3	58.4	62	56.3	55.1	31454000000	535470000	302860000	521770000	6349700000	3952000000	4076500000	4352600000
Q06210	Q06210	Glutamine--fructose-6-phosphate aminotransferase [isomerizing] 1	GFPT1	sp|Q06210|GFPT1_HUMAN Glutamine--fructose-6-phosphate aminotransferase [isomerizing] 1 OS=Homo sapiens OX=9606 GN=GFPT1 PE=1 SV=3	1	25	21	4	5	4	19	18	15	20	19	14	4	4	4	17	16	13	17	16	11	51.6	44.3	78.806	699	699	0	207.51	8.9	10.7	8.2	40.8	36.1	29.9	41.9	38.5	29.5	8508100000	20218000	28126000	30736000	1203300000	1295500000	928420000	1909700000
G8JLB6;P31943;E9PCY7;D6RBM0;E5RGV0;D6RIT2;D6RIU0;H0YB39;D6RAM1;D6R9T0;D6RFM3;D6RDU3;D6RJ04;D6RIH9;E7EQJ0;E7EN40;H0YBG7;H0YBD7;D6RDL0;E5RGH4;D6R9D3;D6RF17;H0YAQ2;E5RJ94	G8JLB6;P31943;E9PCY7;D6RBM0;E5RGV0;D6RIT2;D6RIU0;H0YB39	Heterogeneous nuclear ribonucleoprotein H;Heterogeneous nuclear ribonucleoprotein H, N-terminally processed	HNRNPH1	tr|G8JLB6|G8JLB6_HUMAN Heterogeneous nuclear ribonucleoprotein H OS=Homo sapiens OX=9606 GN=HNRNPH1 PE=1 SV=1;sp|P31943|HNRH1_HUMAN Heterogeneous nuclear ribonucleoprotein H OS=Homo sapiens OX=9606 GN=HNRNPH1 PE=1 SV=4;tr|E9PCY7|E9PCY7_HUMAN Heterogeneous	24	15	8	6	5	4	14	13	12	12	13	12	3	2	2	7	7	7	7	8	7	43.2	24.8	51.229	472	472;449;429;212;155;164;168;277;130;161;163;171;172;184;115;166;185;194;84;100;40;49;131;28	0	206.7	22	17.4	13.8	40.9	41.5	40.3	37.9	40.3	37.9	11945000000	92792000	68392000	99989000	1536900000	1656700000	1656200000	2543900000
P53985;Q5T8R5;Q5T8R3	P53985;Q5T8R5	Monocarboxylate transporter 1	SLC16A1	sp|P53985|MOT1_HUMAN Monocarboxylate transporter 1 OS=Homo sapiens OX=9606 GN=SLC16A1 PE=1 SV=3;tr|Q5T8R5|Q5T8R5_HUMAN Monocarboxylate transporter 1 (Fragment) OS=Homo sapiens OX=9606 GN=SLC16A1 PE=1 SV=1	3	7	7	0	1	1	5	6	6	7	6	4	0	1	1	5	6	6	7	6	4	14.4	14.4	53.944	500	500;456;296	0	205.44	0	4.2	4.2	10.8	11.4	11.4	14.4	11.4	11.2	4561200000	0	3737800	4134100	820780000	692500000	494140000	760310000
Q99460;A0A087WW66;H7BZR6;H7C378;C9J9M4;F8WCE3	Q99460;A0A087WW66	26S proteasome non-ATPase regulatory subunit 1	PSMD1	sp|Q99460|PSMD1_HUMAN 26S proteasome non-ATPase regulatory subunit 1 OS=Homo sapiens OX=9606 GN=PSMD1 PE=1 SV=2;tr|A0A087WW66|A0A087WW66_HUMAN 26S proteasome non-ATPase regulatory subunit 1 OS=Homo sapiens OX=9606 GN=PSMD1 PE=1 SV=1	6	28	28	2	0	1	18	15	17	19	21	19	2	0	1	18	15	17	19	21	19	44	44	105.84	953	953;953;164;192;203;48	0	205.04	3.1	0	2	31.3	26.5	28.3	31.9	35.5	32.1	5994800000	9350800	0	3585700	784180000	681070000	540240000	1465100000
H0YFD6;P40939;A0A2R8Y4F5;A0A2R8YG21;A0A2R8Y688	H0YFD6;P40939;A0A2R8Y4F5;A0A2R8YG21	Trifunctional enzyme subunit alpha, mitochondrial;Long-chain enoyl-CoA hydratase;Long chain 3-hydroxyacyl-CoA dehydrogenase	HADHA	tr|H0YFD6|H0YFD6_HUMAN Trifunctional enzyme subunit alpha, mitochondrial OS=Homo sapiens OX=9606 GN=HADHA PE=1 SV=2;sp|P40939|ECHA_HUMAN Trifunctional enzyme subunit alpha, mitochondrial OS=Homo sapiens OX=9606 GN=HADHA PE=1 SV=2;tr|A0A2R8Y4F5|A0A2R8Y4F5_H	5	29	29	5	5	5	22	23	22	26	24	25	5	5	5	22	23	22	26	24	25	52.4	52.4	86.371	792	792;763;728;499;357	0	202.71	9.3	10	10.7	39.3	42.6	40.5	45.6	43.7	46	20501000000	41263000	15817000	54948000	1967400000	2231300000	1897100000	5363500000
P49368;B4DUR8;E9PRC8;Q5SZX6;E9PQ35;E9PM09;Q5SZW8;Q5SZX9	P49368;B4DUR8	T-complex protein 1 subunit gamma	CCT3	sp|P49368|TCPG_HUMAN T-complex protein 1 subunit gamma OS=Homo sapiens OX=9606 GN=CCT3 PE=1 SV=4;tr|B4DUR8|B4DUR8_HUMAN T-complex protein 1 subunit gamma OS=Homo sapiens OX=9606 GN=CCT3 PE=1 SV=1	8	30	30	9	7	6	26	23	20	22	24	23	9	7	6	26	23	20	22	24	23	58.3	58.3	60.533	545	545;500;234;276;144;154;188;161	0	201.95	23.5	17.6	15.4	52.8	52.1	49.5	55.6	53.8	55.6	32251000000	192610000	79481000	151020000	5049000000	4739600000	3970600000	6553100000
P02768;A0A0C4DGB6;H0YA55;B7WNR0;A0A087WWT3;D6RHD5;C9JKR2;H7C013	P02768;A0A0C4DGB6;H0YA55;B7WNR0;A0A087WWT3;D6RHD5;C9JKR2	Serum albumin	ALB	sp|P02768|ALBU_HUMAN Serum albumin OS=Homo sapiens OX=9606 GN=ALB PE=1 SV=2;tr|A0A0C4DGB6|A0A0C4DGB6_HUMAN Serum albumin OS=Homo sapiens OX=9606 GN=ALB PE=1 SV=1;tr|H0YA55|H0YA55_HUMAN Serum albumin (Fragment) OS=Homo sapiens OX=9606 GN=ALB PE=1 SV=1;tr|B7	8	31	31	26	19	14	9	6	5	4	4	3	26	19	14	9	6	5	4	4	3	60.8	60.8	69.366	609	609;604;454;494;396;459;417;197	0	200.79	54.5	40.4	30.9	19	11.5	8.4	8.4	6.7	5.3	12249000000	1961400000	795260000	856760000	1645100000	935120000	1281500000	1293700000
P00387;B1AHF3	P00387;B1AHF3	NADH-cytochrome b5 reductase 3;NADH-cytochrome b5 reductase 3 membrane-bound form;NADH-cytochrome b5 reductase 3 soluble form	CYB5R3	sp|P00387|NB5R3_HUMAN NADH-cytochrome b5 reductase 3 OS=Homo sapiens OX=9606 GN=CYB5R3 PE=1 SV=3;tr|B1AHF3|B1AHF3_HUMAN NADH-cytochrome b5 reductase 3 (Fragment) OS=Homo sapiens OX=9606 GN=CYB5R3 PE=1 SV=1	2	17	17	3	4	3	15	14	16	15	14	16	3	4	3	15	14	16	15	14	16	75.1	75.1	34.234	301	301;147	0	200.42	15.6	15.6	15.6	74.1	74.4	75.1	74.4	64.5	75.1	42216000000	44506000	32526000	101040000	5331000000	5858000000	5524700000	7403600000
P23219;A0A087X296;A0A2R8YDM0;X6RJD6;P35354	P23219;A0A087X296;A0A2R8YDM0	Prostaglandin G/H synthase 1	PTGS1	sp|P23219|PGH1_HUMAN Prostaglandin G/H synthase 1 OS=Homo sapiens OX=9606 GN=PTGS1 PE=1 SV=2;tr|A0A087X296|A0A087X296_HUMAN Prostaglandin G/H synthase 1 OS=Homo sapiens OX=9606 GN=PTGS1 PE=1 SV=1;tr|A0A2R8YDM0|A0A2R8YDM0_HUMAN Prostaglandin G/H synthase 1	5	16	16	1	0	0	7	8	9	9	11	10	1	0	0	7	8	9	9	11	10	30.9	30.9	68.686	599	599;551;402;171;604	0	199.21	3.2	0	0	16.9	19.9	24.7	20.2	20.7	27	6468700000	5205400	0	0	947740000	897840000	564750000	1369200000
Q96P70	Q96P70	Importin-9	IPO9	sp|Q96P70|IPO9_HUMAN Importin-9 OS=Homo sapiens OX=9606 GN=IPO9 PE=1 SV=3	1	25	25	0	0	0	20	17	18	17	19	16	0	0	0	20	17	18	17	19	16	33.2	33.2	115.96	1041	1041	0	199.08	0	0	0	29.8	22.4	25.6	23.2	24.9	24.3	16094000000	0	0	0	2455500000	2647200000	1898100000	2980500000
P42345;B1AKP8;B1AKQ2	P42345	Serine/threonine-protein kinase mTOR	MTOR	sp|P42345|MTOR_HUMAN Serine/threonine-protein kinase mTOR OS=Homo sapiens OX=9606 GN=MTOR PE=1 SV=1	3	46	46	0	0	0	27	24	16	34	33	26	0	0	0	27	24	16	34	33	26	25.8	25.8	288.89	2549	2549;754;161	0	198.07	0	0	0	15.9	13.7	9.2	18.9	18.8	15.4	7478100000	0	0	0	1046500000	885290000	464300000	1784700000
O43592;F8WDU6;F5GYW6;F5GZM3	O43592	Exportin-T	XPOT	sp|O43592|XPOT_HUMAN Exportin-T OS=Homo sapiens OX=9606 GN=XPOT PE=1 SV=2	4	31	31	0	0	0	22	19	20	19	24	24	0	0	0	22	19	20	19	24	24	41.3	41.3	109.96	962	962;201;60;63	0	197.3	0	0	0	32.7	27.7	29	29.3	35.2	35.4	22975000000	0	0	0	3664800000	2724300000	2139300000	4013200000
O60763	O60763	General vesicular transport factor p115	USO1	sp|O60763|USO1_HUMAN General vesicular transport factor p115 OS=Homo sapiens OX=9606 GN=USO1 PE=1 SV=2	1	24	24	3	3	3	20	16	15	18	20	16	3	3	3	20	16	15	18	20	16	38.6	38.6	107.89	962	962	0	196.61	4.5	4.7	4.8	31.5	26	26.3	30.8	33.1	27.4	6238600000	10096000	6275400	5105300	1142000000	758680000	544660000	1263500000
Q92538	Q92538	Golgi-specific brefeldin A-resistance guanine nucleotide exchange factor 1	GBF1	sp|Q92538|GBF1_HUMAN Golgi-specific brefeldin A-resistance guanine nucleotide exchange factor 1 OS=Homo sapiens OX=9606 GN=GBF1 PE=1 SV=2	1	43	43	0	0	0	33	28	26	30	35	29	0	0	0	33	28	26	30	35	29	30.7	30.7	206.44	1859	1859	0	194.09	0	0	0	24.1	23	21	23.3	26.8	23.7	11583000000	0	0	0	1974500000	1678100000	1015600000	2289700000
P17987;E7EQR6;E7ERF2;F5H282;F5GZ03;F5H136;F5GZI8;F5H676;F5H726;F5GYL4;F5H7Y1	P17987;E7EQR6;E7ERF2;F5H282	T-complex protein 1 subunit alpha	TCP1	sp|P17987|TCPA_HUMAN T-complex protein 1 subunit alpha OS=Homo sapiens OX=9606 GN=TCP1 PE=1 SV=1;tr|E7EQR6|E7EQR6_HUMAN T-complex protein 1 subunit alpha OS=Homo sapiens OX=9606 GN=TCP1 PE=1 SV=1;tr|E7ERF2|E7ERF2_HUMAN T-complex protein 1 subunit alpha OS=	11	27	27	10	8	10	21	18	17	21	21	19	10	8	10	21	18	17	21	21	19	56.8	56.8	60.343	556	556;401;433;332;221;136;100;111;91;65;59	0	193.48	25	21.8	26.6	48.9	41	38.1	46.9	46.4	46.9	20187000000	139560000	108170000	215190000	3314300000	2485800000	2005800000	4446900000
Q08211	Q08211	ATP-dependent RNA helicase A	DHX9	sp|Q08211|DHX9_HUMAN ATP-dependent RNA helicase A OS=Homo sapiens OX=9606 GN=DHX9 PE=1 SV=4	1	35	35	6	7	6	23	17	19	20	20	25	6	7	6	23	17	19	20	20	25	40.1	40.1	140.96	1270	1270	0	192.03	5.4	7.7	6.8	25.5	21	23.2	25.4	28	31.2	8808000000	29643000	50694000	35343000	1310200000	1145300000	976240000	1864000000
Q01082;A0A087WUZ3;F8W6C1;A4QPE4	Q01082;A0A087WUZ3	Spectrin beta chain, non-erythrocytic 1	SPTBN1	sp|Q01082|SPTB2_HUMAN Spectrin beta chain, non-erythrocytic 1 OS=Homo sapiens OX=9606 GN=SPTBN1 PE=1 SV=2;tr|A0A087WUZ3|A0A087WUZ3_HUMAN Spectrin beta chain OS=Homo sapiens OX=9606 GN=SPTBN1 PE=1 SV=1	4	62	57	8	12	4	35	23	36	22	30	37	8	11	4	33	22	34	22	30	35	35.6	32.8	274.61	2364	2364;2366;690;934	0	188.09	4.5	5.8	2.3	21.9	13.5	21.7	14.4	18	23.6	5164800000	33019000	53840000	7563800	626650000	462010000	1158300000	690700000
Q8N1F7;H3BVG0;H3BM93;H3BPA9;H3BRI8;H3BP95;H3BMX0;H3BNN5;H3BV11;H3BVE2;H3BRD9;H3BV15;H3BNG7	Q8N1F7;H3BVG0	Nuclear pore complex protein Nup93	NUP93	sp|Q8N1F7|NUP93_HUMAN Nuclear pore complex protein Nup93 OS=Homo sapiens OX=9606 GN=NUP93 PE=1 SV=2;tr|H3BVG0|H3BVG0_HUMAN Nuclear pore complex protein Nup93 OS=Homo sapiens OX=9606 GN=NUP93 PE=1 SV=1	13	32	32	0	0	0	19	19	17	17	26	21	0	0	0	19	19	17	17	26	21	50.4	50.4	93.487	819	819;880;178;229;151;156;125;132;136;117;140;84;40	0	186.08	0	0	0	28.7	32.8	30.3	30	42.2	35.3	8583600000	0	0	0	1151600000	1173000000	977990000	1558600000
P26640;A0A140T936;A0A140T954;A2ABF4;A0A0G2JJT9;H0Y426;A0A140T904	P26640;A0A140T936	Valine--tRNA ligase	VARS	sp|P26640|SYVC_HUMAN Valine--tRNA ligase OS=Homo sapiens OX=9606 GN=VARS1 PE=1 SV=4;tr|A0A140T936|A0A140T936_HUMAN Valyl-tRNA synthetase 1 (Fragment) OS=Homo sapiens OX=9606 GN=VARS1 PE=1 SV=1	7	33	33	5	7	6	26	20	15	23	22	22	5	7	6	26	20	15	23	22	22	33.9	33.9	140.47	1264	1264;1183;366;174;174;288;95	0	185.47	6.5	8	7.2	27.8	23	16.1	26.2	23.7	24.4	7186000000	63517000	30450000	37381000	1155000000	848910000	589080000	1648100000
P08758;D6RBL5;D6RBE9;E9PHT9;D6RCN3	P08758;D6RBL5;D6RBE9	Annexin A5;Annexin	ANXA5	sp|P08758|ANXA5_HUMAN Annexin A5 OS=Homo sapiens OX=9606 GN=ANXA5 PE=1 SV=2;tr|D6RBL5|D6RBL5_HUMAN Annexin OS=Homo sapiens OX=9606 GN=ANXA5 PE=1 SV=1;tr|D6RBE9|D6RBE9_HUMAN Annexin OS=Homo sapiens OX=9606 GN=ANXA5 PE=1 SV=1	5	20	20	8	7	6	14	13	12	14	15	16	8	7	6	14	13	12	14	15	16	66.2	66.2	35.936	320	320;260;220;163;35	0	182.84	35.3	32.5	24.7	51.6	50.6	44.7	53.8	55	56.6	17052000000	532660000	302640000	543240000	2452200000	2462900000	1421300000	3483400000
Q15393;I3L4G7;H3BMB0;J3QRB2;J3QL37;J3QKV4	Q15393	Splicing factor 3B subunit 3	SF3B3	sp|Q15393|SF3B3_HUMAN Splicing factor 3B subunit 3 OS=Homo sapiens OX=9606 GN=SF3B3 PE=1 SV=4	6	35	35	1	1	0	11	13	12	22	25	27	1	1	0	11	13	12	22	25	27	40.9	40.9	135.58	1217	1217;72;30;31;57;91	0	182.16	1.1	1.1	0	13.6	14.8	14.5	27.5	28.3	34.7	6180400000	4786000	1369600	0	528180000	608850000	384540000	1471900000
Q9UBG0;E7EME3;J3QQZ6	Q9UBG0	C-type mannose receptor 2	MRC2	sp|Q9UBG0|MRC2_HUMAN C-type mannose receptor 2 OS=Homo sapiens OX=9606 GN=MRC2 PE=1 SV=2	3	23	23	0	0	1	17	13	15	15	17	15	0	0	1	17	13	15	15	17	15	23.9	23.9	166.67	1479	1479;345;35	0	181.92	0	0	0.8	18	13.1	16.3	13.9	15.8	17.8	3371500000	0	0	613630	545760000	477080000	462200000	547110000
P63244;D6RAC2;J3KPE3;D6REE5;D6RHH4;H0YAF8;H0Y8W2;D6R9Z1;H0YAM7;D6R9L0;D6RFX4;D6RBD0;D6RAU2;E9PD14;D6RFZ9;D6RF23;H0Y8R5;D6R909;D6RGK8;H0Y9P0;D6RHJ5;D6RDI0	P63244;D6RAC2;J3KPE3;D6REE5;D6RHH4;H0YAF8;H0Y8W2;D6R9Z1;H0YAM7;D6R9L0;D6RFX4	Guanine nucleotide-binding protein subunit beta-2-like 1;Guanine nucleotide-binding protein subunit beta-2-like 1, N-terminally processed	GNB2L1	sp|P63244|RACK1_HUMAN Receptor of activated protein C kinase 1 OS=Homo sapiens OX=9606 GN=RACK1 PE=1 SV=3;tr|D6RAC2|D6RAC2_HUMAN Receptor of-activated protein C kinase 1 OS=Homo sapiens OX=9606 GN=RACK1 PE=1 SV=1;tr|J3KPE3|J3KPE3_HUMAN Receptor of-activate	22	21	21	10	11	12	18	16	17	17	20	17	10	11	12	18	16	17	17	20	17	89.9	89.9	35.076	317	317;269;273;321;233;198;274;236;247;300;194;160;147;153;197;101;138;116;71;83;86;39	0	178.57	52.7	52.7	59.3	76.3	73.8	76	73.8	81.1	82.6	33134000000	285000000	275530000	449070000	5059900000	4152200000	4066200000	6429600000
P52907	P52907	F-actin-capping protein subunit alpha-1	CAPZA1	sp|P52907|CAZA1_HUMAN F-actin-capping protein subunit alpha-1 OS=Homo sapiens OX=9606 GN=CAPZA1 PE=1 SV=3	1	15	13	8	7	6	11	11	10	12	11	13	7	6	5	9	9	8	10	9	12	66.8	63.3	32.922	286	286	0	177.29	46.2	33.2	38.1	65.7	59.8	60.8	66.4	55.9	62.9	7477900000	204080000	136720000	161870000	1185600000	976240000	893330000	1560200000
Q99832;F8WAM2;F8WBP8;A0A0D9SG95	Q99832	T-complex protein 1 subunit eta	CCT7	sp|Q99832|TCPH_HUMAN T-complex protein 1 subunit eta OS=Homo sapiens OX=9606 GN=CCT7 PE=1 SV=2	4	27	27	6	6	6	21	22	21	23	20	24	6	6	6	21	22	21	23	20	24	54	54	59.366	543	543;98;83;83	0	176.94	17.3	13.3	17.3	46.2	46	49.5	46.6	42.9	50.6	21827000000	79567000	53429000	102750000	3061300000	3294900000	1859300000	4536300000
Q92973;S4R398;E7EW37;K7ENW1	Q92973	Transportin-1	TNPO1	sp|Q92973|TNPO1_HUMAN Transportin-1 OS=Homo sapiens OX=9606 GN=TNPO1 PE=1 SV=2	4	28	22	2	0	0	20	23	20	21	22	24	2	0	0	17	18	18	18	19	22	40.1	32.7	102.35	898	898;193;136;85	0	176.47	3	0	0	29.7	32.9	32.1	31.4	32.6	34.4	48837000000	7274900	0	0	6631100000	7155000000	5060700000	8859000000
Q9UBB4;A0A1W2PQD2;B1AHE4;B1AHE3	Q9UBB4;A0A1W2PQD2	Ataxin-10	ATXN10	sp|Q9UBB4|ATX10_HUMAN Ataxin-10 OS=Homo sapiens OX=9606 GN=ATXN10 PE=1 SV=1;tr|A0A1W2PQD2|A0A1W2PQD2_HUMAN Ataxin-10 OS=Homo sapiens OX=9606 GN=ATXN10 PE=1 SV=1	4	23	23	1	2	1	15	12	15	14	16	21	1	2	1	15	12	15	14	16	21	62.9	62.9	53.488	475	475;395;197;126	0	175.44	3.2	6.7	3.2	34.9	31.4	41.7	33.1	39.8	61.1	14533000000	2540500	2734800	0	1949400000	1827600000	1665800000	2973200000
Q5T749	Q5T749	Keratinocyte proline-rich protein	KPRP	sp|Q5T749|KPRP_HUMAN Keratinocyte proline-rich protein OS=Homo sapiens OX=9606 GN=KPRP PE=1 SV=1	1	22	22	19	12	18	14	16	13	12	16	18	19	12	18	14	16	13	12	16	18	51.5	51.5	64.135	579	579	0	175.32	46.8	26.3	47.8	44.6	51.1	38.3	40.1	49.7	49.6	9536100000	935030000	196750000	1047400000	712370000	1645100000	902660000	678030000
P27348;E9PG15	P27348	14-3-3 protein theta	YWHAQ	sp|P27348|1433T_HUMAN 14-3-3 protein theta OS=Homo sapiens OX=9606 GN=YWHAQ PE=1 SV=1	2	15	12	9	10	7	15	13	12	14	13	12	8	9	7	12	11	10	11	11	11	62.9	51.8	27.764	245	245;149	0	175.1	44.5	44.5	40.4	62.9	59.2	52.7	62.9	59.2	55.9	16000000000	187250000	165840000	225760000	3222200000	2206000000	1840900000	2492900000
Q15746;D6R9C2;F8WBL7	Q15746	Myosin light chain kinase, smooth muscle;Myosin light chain kinase, smooth muscle, deglutamylated form	MYLK	sp|Q15746|MYLK_HUMAN Myosin light chain kinase, smooth muscle OS=Homo sapiens OX=9606 GN=MYLK PE=1 SV=4	3	46	46	2	2	3	13	17	10	35	33	32	2	2	3	13	17	10	35	33	32	35.1	35.1	210.71	1914	1914;229;70	0	175.06	1.3	1.5	2.4	10.9	13.3	8.1	27.5	26.9	24.1	8445600000	2036400	2890900	8635300	327480000	414040000	201150000	2423200000
Q9BUF5;K7ESM5;K7EL29;K7ES63;K7EN98;K7ESQ3;K7EQT3;K7EJ64;K7ERA8;K7EJZ4;K7EPE5	Q9BUF5;K7ESM5	Tubulin beta-6 chain	TUBB6	sp|Q9BUF5|TBB6_HUMAN Tubulin beta-6 chain OS=Homo sapiens OX=9606 GN=TUBB6 PE=1 SV=1;tr|K7ESM5|K7ESM5_HUMAN Tubulin beta chain (Fragment) OS=Homo sapiens OX=9606 GN=TUBB6 PE=1 SV=1	11	28	13	17	16	13	25	23	26	24	23	27	6	6	4	11	11	12	11	10	13	81.8	44.8	49.857	446	446;338;130;116;136;96;104;104;110;115;141	0	174.8	50.2	47.1	42.2	74.2	72	80	74	73.8	80	51298000000	323470000	203930000	153390000	8125500000	7491800000	6072300000	9149900000
P33176;Q12840;J3KNA1;C9JWB9	P33176	Kinesin-1 heavy chain	KIF5B	sp|P33176|KINH_HUMAN Kinesin-1 heavy chain OS=Homo sapiens OX=9606 GN=KIF5B PE=1 SV=1	4	28	22	1	2	1	17	15	10	11	15	15	1	0	1	13	12	8	10	13	13	39.4	32.5	109.68	963	963;1032;943;76	0	174.64	1.5	2.4	1.5	26.8	21.4	17.5	16.5	19.4	22.4	2717200000	0	14151000	995970	560550000	483980000	206380000	422890000
P30153;B3KQV6;C9J9C1;E9PH38;E9PPI5;E9PHZ6	P30153;B3KQV6;C9J9C1	Serine/threonine-protein phosphatase 2A 65 kDa regulatory subunit A alpha isoform	PPP2R1A	sp|P30153|2AAA_HUMAN Serine/threonine-protein phosphatase 2A 65 kDa regulatory subunit A alpha isoform OS=Homo sapiens OX=9606 GN=PPP2R1A PE=1 SV=4;tr|B3KQV6|B3KQV6_HUMAN Serine/threonine-protein phosphatase 2A 65 kDa regulatory subunit A alpha isoform OS=	6	21	17	4	6	2	14	16	14	16	15	16	3	4	1	11	13	11	13	12	12	44	36.7	65.308	589	589;410;395;132;83;135	0	174.56	10	13.6	4.2	34.3	36	33.1	37.2	34.5	34.6	18297000000	14638000	26328000	12174000	2397700000	2626800000	2017800000	4131300000
A0A1W2PNV4;E9PF58;F8WFD3	A0A1W2PNV4			tr|A0A1W2PNV4|A0A1W2PNV4_HUMAN Uncharacterized protein OS=Homo sapiens OX=9606 PE=4 SV=1	3	15	0	1	1	2	7	10	11	11	12	13	0	0	0	0	0	0	0	0	0	37.1	0	75.872	684	684;279;53	0	174.54	2.6	2.6	5.1	14.8	26	28.5	28.5	29.7	33.5	7213200000	15558000	23801000	32300000	740230000	979130000	852010000	1530400000
P62873;F6UT28;B1AKQ8;F6X3N5;B3KVK2	P62873;F6UT28;B1AKQ8;F6X3N5	Guanine nucleotide-binding protein G(I)/G(S)/G(T) subunit beta-1	GNB1	sp|P62873|GBB1_HUMAN Guanine nucleotide-binding protein G(I)/G(S)/G(T) subunit beta-1 OS=Homo sapiens OX=9606 GN=GNB1 PE=1 SV=3;tr|F6UT28|F6UT28_HUMAN Guanine nucleotide-binding protein G(I)/G(S)/G(T) subunit beta-1 (Fragment) OS=Homo sapiens OX=9606 GN=GN	5	16	10	5	5	2	8	9	11	8	11	10	2	2	0	6	6	9	5	7	6	67.6	40.3	37.377	340	340;165;107;163;240	0	171.38	24.1	19.4	10	41.8	45	40.9	39.7	56.2	54.1	8058100000	77121000	174720000	27190000	837710000	849830000	1294000000	1015000000
Q9NQC3	Q9NQC3	Reticulon-4	RTN4	sp|Q9NQC3|RTN4_HUMAN Reticulon-4 OS=Homo sapiens OX=9606 GN=RTN4 PE=1 SV=2	1	12	3	5	4	4	9	10	8	9	9	10	1	1	1	2	2	2	2	2	3	20.1	5.6	129.93	1192	1192	0	170.59	8.5	7.1	5.6	18.5	19.2	16.2	18.5	18.5	17	70711000000	84703000	58184000	82338000	9669000000	9479900000	8140800000	14569000000
O60701;E7ER95;E7ER83;E7ETF4;E7EV97;D6RHF4;E9PBD2	O60701	UDP-glucose 6-dehydrogenase	UGDH	sp|O60701|UGDH_HUMAN UDP-glucose 6-dehydrogenase OS=Homo sapiens OX=9606 GN=UGDH PE=1 SV=1	7	18	18	6	3	3	14	10	9	11	11	10	6	3	3	14	10	9	11	11	10	52.6	52.6	55.023	494	494;84;130;153;181;53;55	0	170.41	20.4	9.3	13.2	45.5	27.7	27.3	35.6	33	30.2	5078100000	51514000	30927000	19221000	870470000	808530000	481930000	1150900000
Q9UHD9	Q9UHD9	Ubiquilin-2	UBQLN2	sp|Q9UHD9|UBQL2_HUMAN Ubiquilin-2 OS=Homo sapiens OX=9606 GN=UBQLN2 PE=1 SV=2	1	10	6	0	0	0	9	6	6	6	8	6	0	0	0	5	3	3	2	4	3	26.8	16.8	65.695	624	624	0	169.94	0	0	0	22.4	17.1	17.5	15.5	22.4	15.2	2023200000	0	0	0	215100000	259640000	162450000	555100000
P34932;A0A087WYC1;A0A087WTS8	P34932;A0A087WYC1;A0A087WTS8	Heat shock 70 kDa protein 4	HSPA4	sp|P34932|HSP74_HUMAN Heat shock 70 kDa protein 4 OS=Homo sapiens OX=9606 GN=HSPA4 PE=1 SV=4;tr|A0A087WYC1|A0A087WYC1_HUMAN Heat shock 70 kDa protein 4 OS=Homo sapiens OX=9606 GN=HSPA4 PE=1 SV=1;tr|A0A087WTS8|A0A087WTS8_HUMAN Heat shock 70 kDa protein 4 OS	3	33	32	14	9	7	24	18	15	22	21	18	14	9	7	23	18	15	21	21	17	54.4	52.7	94.33	840	840;699;475	0	169.8	29.6	18.1	12.6	43.3	32.7	28.2	40.5	37.4	34.4	5680700000	139690000	68101000	77037000	922110000	863860000	578880000	1195500000
P27708;F8VPD4;H7C2E4;H7C3Z5;H7BZB3;P31327	P27708;F8VPD4	CAD protein;Glutamine-dependent carbamoyl-phosphate synthase;Aspartate carbamoyltransferase;Dihydroorotase	CAD	sp|P27708|PYR1_HUMAN CAD protein OS=Homo sapiens OX=9606 GN=CAD PE=1 SV=3;tr|F8VPD4|F8VPD4_HUMAN CAD protein OS=Homo sapiens OX=9606 GN=CAD PE=1 SV=1	6	51	51	2	5	3	32	26	21	25	32	26	2	5	3	32	26	21	25	32	26	39.7	39.7	242.98	2225	2225;2162;293;269;279;1500	0	169.52	1.2	3.1	1.8	24	18.9	14.9	19.1	24.2	19.8	7410100000	19526000	12546000	21205000	1358700000	1158500000	691970000	1369600000
Q96A33;A0A087WYW6;J3QR89	Q96A33	Coiled-coil domain-containing protein 47	CCDC47	sp|Q96A33|CCD47_HUMAN Coiled-coil domain-containing protein 47 OS=Homo sapiens OX=9606 GN=CCDC47 PE=1 SV=1	3	18	18	0	0	0	14	14	12	13	13	13	0	0	0	14	14	12	13	13	13	42.7	42.7	55.873	483	483;190;54	0	169.19	0	0	0	35.2	31.3	29.8	36	31.3	33.3	10151000000	0	0	0	1214100000	1233400000	880300000	2181800000
P49588;H3BPK7	P49588	Alanine--tRNA ligase, cytoplasmic	AARS	sp|P49588|SYAC_HUMAN Alanine--tRNA ligase, cytoplasmic OS=Homo sapiens OX=9606 GN=AARS1 PE=1 SV=2	2	30	30	2	3	1	20	17	15	20	19	17	2	3	1	20	17	15	20	19	17	47	47	106.81	968	968;280	0	167.93	3	2.1	2.2	33.1	30	26.8	33.9	33.4	28.8	6292400000	4267300	6758000	0	1133600000	811080000	623260000	1430200000
Q5D862	Q5D862	Filaggrin-2	FLG2	sp|Q5D862|FILA2_HUMAN Filaggrin-2 OS=Homo sapiens OX=9606 GN=FLG2 PE=1 SV=1	1	15	15	10	4	9	3	9	5	4	5	4	10	4	9	3	9	5	4	5	4	14.2	14.2	248.07	2391	2391	0	166.52	9.2	2.9	8.4	2.8	9.4	5.5	4	5.5	4	1588100000	218530000	33874000	219190000	66480000	385380000	204500000	51472000
Q15021;E7EN77;F5GZK7;F5H431;REV__Q02790	Q15021;E7EN77	Condensin complex subunit 1	NCAPD2	sp|Q15021|CND1_HUMAN Condensin complex subunit 1 OS=Homo sapiens OX=9606 GN=NCAPD2 PE=1 SV=3;tr|E7EN77|E7EN77_HUMAN Condensin complex subunit 1 (Fragment) OS=Homo sapiens OX=9606 GN=NCAPD2 PE=1 SV=2	5	35	35	0	0	0	22	21	16	20	22	21	0	0	0	22	21	16	20	22	21	35.3	35.3	157.18	1401	1401;919;118;81;459	0	166.26	0	0	0	25.2	23.1	19	23.6	24.8	24.2	7818000000	0	0	0	1294400000	1095500000	644980000	1384000000
Q14764;H3BQK6;H3BRL2;H3BUK7;H3BNF6;H3BP76;H3BPZ2;H3BNF2;H3BUP3;H3BQE7;I3L155	Q14764	Major vault protein	MVP	sp|Q14764|MVP_HUMAN Major vault protein OS=Homo sapiens OX=9606 GN=MVP PE=1 SV=4	11	36	36	7	11	7	28	22	26	22	31	28	7	11	7	28	22	26	22	31	28	55.8	55.8	99.326	893	893;220;148;107;144;94;39;42;57;81;61	0	164.97	10.8	16.7	11.6	43.6	36.7	44	39	47.3	47.1	14419000000	58151000	42891000	43432000	2107000000	1691300000	1446300000	2448800000
Q96AG4;I3L223	Q96AG4	Leucine-rich repeat-containing protein 59	LRRC59	sp|Q96AG4|LRC59_HUMAN Leucine-rich repeat-containing protein 59 OS=Homo sapiens OX=9606 GN=LRRC59 PE=1 SV=1	2	12	12	2	3	2	9	9	9	11	12	9	2	3	2	9	9	9	11	12	9	47.2	47.2	34.93	307	307;62	0	164.5	11.4	18.9	11.4	39.7	37.1	39.7	45	47.2	30.6	17004000000	37976000	53866000	41606000	2045300000	2463500000	1677200000	4272300000
P49755;G3V2K7	P49755;G3V2K7	Transmembrane emp24 domain-containing protein 10	TMED10	sp|P49755|TMEDA_HUMAN Transmembrane emp24 domain-containing protein 10 OS=Homo sapiens OX=9606 GN=TMED10 PE=1 SV=2;tr|G3V2K7|G3V2K7_HUMAN Transmembrane emp24 domain-containing protein 10 OS=Homo sapiens OX=9606 GN=TMED10 PE=1 SV=1	2	10	10	1	0	0	9	5	5	7	7	7	1	0	0	9	5	5	7	7	7	49.3	49.3	24.976	219	219;153	0	163.93	5	0	0	41.1	26.5	29.2	36.5	36.5	44.7	3121500000	12233000	0	0	564660000	356930000	231640000	528780000
P62241;Q5JR95	P62241;Q5JR95	40S ribosomal protein S8	RPS8	sp|P62241|RS8_HUMAN 40S ribosomal protein S8 OS=Homo sapiens OX=9606 GN=RPS8 PE=1 SV=2;tr|Q5JR95|Q5JR95_HUMAN 40S ribosomal protein S8 OS=Homo sapiens OX=9606 GN=RPS8 PE=1 SV=1	2	13	13	8	8	10	10	11	11	11	11	12	8	8	10	10	11	11	11	11	12	54.8	54.8	24.205	208	208;188	0	162.17	44.2	47.1	46.2	49	49	49.5	49	49	49.5	37605000000	899440000	984600000	1591800000	4394400000	4601800000	4250900000	7190500000
P11216;H0Y4Z6	P11216	Glycogen phosphorylase, brain form	PYGB	sp|P11216|PYGB_HUMAN Glycogen phosphorylase, brain form OS=Homo sapiens OX=9606 GN=PYGB PE=1 SV=5	2	33	28	6	5	4	21	17	20	20	22	19	5	4	3	18	14	15	16	18	15	46.4	39	96.695	843	843;245	0	161.66	8.7	9.8	6.8	36.2	32.1	33.6	35.1	32.7	32.1	10015000000	54286000	12439000	28979000	1519600000	1215700000	1411500000	2186000000
A0A1B0GW44;A0A1B0GVD5;A0A1B0GWE8;P07339;H7C469;A0A1B0GVP3;A0A1B0GV23;A0A1B0GU92;A0A1B0GU03;C9JH19;H7C1V0;F8WD96;F8W787;A0A1B0GVF1	A0A1B0GW44;A0A1B0GVD5;A0A1B0GWE8;P07339;H7C469;A0A1B0GVP3;A0A1B0GV23;A0A1B0GU92;A0A1B0GU03;C9JH19	Cathepsin D;Cathepsin D light chain;Cathepsin D heavy chain	CTSD	tr|A0A1B0GW44|A0A1B0GW44_HUMAN Cathepsin D OS=Homo sapiens OX=9606 GN=CTSD PE=1 SV=1;tr|A0A1B0GVD5|A0A1B0GVD5_HUMAN Cathepsin D OS=Homo sapiens OX=9606 GN=CTSD PE=1 SV=1;tr|A0A1B0GWE8|A0A1B0GWE8_HUMAN Cathepsin D OS=Homo sapiens OX=9606 GN=CTSD PE=1 SV=1;s	14	13	13	4	5	2	10	10	11	9	9	9	4	5	2	10	10	11	9	9	9	41.5	41.5	43.688	405	405;409;410;412;336;405;406;557;582;299;189;276;199;73	0	160.12	14.6	15.8	7.2	34.3	34.3	39.3	31.6	31.6	34.3	11011000000	23538000	31164000	11690000	1478200000	1692600000	1388700000	2108100000
Q7KZF4;H7C597	Q7KZF4	Staphylococcal nuclease domain-containing protein 1	SND1	sp|Q7KZF4|SND1_HUMAN Staphylococcal nuclease domain-containing protein 1 OS=Homo sapiens OX=9606 GN=SND1 PE=1 SV=1	2	34	34	4	7	5	27	24	21	22	25	25	4	7	5	27	24	21	22	25	25	52	52	102	910	910;231	0	160.11	6.6	10.8	6.9	41.5	36.7	37.4	34.3	38.6	41.4	13025000000	33835000	27233000	32386000	2045100000	1963400000	1178600000	2374300000
P50990;H7C4C8;H7C2U0	P50990	T-complex protein 1 subunit theta	CCT8	sp|P50990|TCPQ_HUMAN T-complex protein 1 subunit theta OS=Homo sapiens OX=9606 GN=CCT8 PE=1 SV=4	3	34	34	11	9	6	26	24	25	27	27	25	11	9	6	26	24	25	27	27	25	69.3	69.3	59.62	548	548;323;107	0	157.93	25	18.6	12.6	51.6	54	60.6	50.2	52.6	60.6	29056000000	199090000	125910000	80157000	4137600000	3853800000	3514000000	5877900000
P19338;H7BY16	P19338;H7BY16	Nucleolin	NCL	sp|P19338|NUCL_HUMAN Nucleolin OS=Homo sapiens OX=9606 GN=NCL PE=1 SV=3;tr|H7BY16|H7BY16_HUMAN Nucleolin (Fragment) OS=Homo sapiens OX=9606 GN=NCL PE=1 SV=8	2	18	18	5	6	3	10	13	9	13	12	11	5	6	3	10	13	9	13	12	11	26.1	26.1	76.613	710	710;296	0	155.19	9.7	8.9	6.3	17.7	20.3	13.4	19	19.7	17.9	7290000000	42996000	81151000	70516000	950950000	1145900000	625910000	1290300000
F1T0B3;A0A087X2G1;Q92499	F1T0B3;A0A087X2G1;Q92499	ATP-dependent RNA helicase DDX1	DDX1	tr|F1T0B3|F1T0B3_HUMAN ATP-dependent RNA helicase DDX1 OS=Homo sapiens OX=9606 GN=DDX1 PE=1 SV=1;tr|A0A087X2G1|A0A087X2G1_HUMAN ATP-dependent RNA helicase DDX1 OS=Homo sapiens OX=9606 GN=DDX1 PE=1 SV=1;sp|Q92499|DDX1_HUMAN ATP-dependent RNA helicase DDX1 O	3	20	20	1	2	0	14	10	7	9	12	6	1	2	0	14	10	7	9	12	6	42.9	42.9	73.915	659	659;659;740	0	152.63	1.7	3.5	0	29.9	23.1	17.6	20.5	26.1	14.3	2416400000	5552000	610940	0	422510000	339700000	276040000	431000000
O75369;E7EN95;H7C5L4;A0A0A0MT44	O75369;E7EN95	Filamin-B	FLNB	sp|O75369|FLNB_HUMAN Filamin-B OS=Homo sapiens OX=9606 GN=FLNB PE=1 SV=2;tr|E7EN95|E7EN95_HUMAN Filamin-B OS=Homo sapiens OX=9606 GN=FLNB PE=1 SV=1	4	53	46	12	16	10	33	27	20	34	37	29	7	13	6	27	22	15	28	31	23	32.2	29	278.16	2602	2602;2409;135;195	0	152.53	6.5	9.5	5.7	21.8	17.2	12.5	21.2	24.3	17.2	4827700000	21192000	35048000	34323000	727310000	624230000	342790000	1153700000
P32969;A0A2R8Y5Y7;E7ESE0;D6RAN4;H0Y9V9;H0Y9R4	P32969;A0A2R8Y5Y7;E7ESE0;D6RAN4;H0Y9V9	60S ribosomal protein L9	RPL9	sp|P32969|RL9_HUMAN 60S ribosomal protein L9 OS=Homo sapiens OX=9606 GN=RPL9 PE=1 SV=1;tr|A0A2R8Y5Y7|A0A2R8Y5Y7_HUMAN 60S ribosomal protein L9 OS=Homo sapiens OX=9606 GN=RPL9 PE=1 SV=1;tr|E7ESE0|E7ESE0_HUMAN 60S ribosomal protein L9 (Fragment) OS=Homo sapi	6	9	9	4	4	5	7	6	6	5	6	7	4	4	5	7	6	6	5	6	7	65.6	65.6	21.863	192	192;220;166;181;113;90	0	152.18	28.1	26.6	40.6	53.6	53.6	61.5	50	53.6	62	11514000000	44438000	209330000	221920000	1610400000	1296700000	1265400000	2008700000
P30041	P30041	Peroxiredoxin-6	PRDX6	sp|P30041|PRDX6_HUMAN Peroxiredoxin-6 OS=Homo sapiens OX=9606 GN=PRDX6 PE=1 SV=3	1	16	16	4	4	4	10	10	9	12	14	13	4	4	4	10	10	9	12	14	13	73.7	73.7	25.035	224	224	0	150.82	24.1	28.1	25.4	53.1	50.4	58	53.1	66.1	73.2	10249000000	112240000	64879000	120510000	1199700000	1471400000	1123900000	2089500000
Q96QK1;I3L4S0;A0A1W2PP10;A0A3B3ITD4	Q96QK1	Vacuolar protein sorting-associated protein 35	VPS35	sp|Q96QK1|VPS35_HUMAN Vacuolar protein sorting-associated protein 35 OS=Homo sapiens OX=9606 GN=VPS35 PE=1 SV=2	4	20	20	2	1	0	12	11	10	15	14	13	2	1	0	12	11	10	15	14	13	32.3	32.3	91.706	796	796;41;46;47	0	150.5	4.4	1.8	0	19.2	17.6	17.2	24.9	23.4	21.2	7389500000	7520900	4656700	0	1063200000	972430000	771770000	1653000000
A0A0C4DGQ5;P04632;K7ELJ7;K7EIV0;A0A075B7C0;K7EKD8;U3KQE2;K7EM73;U3KPR7;Q96L46;K7ES78;K7EMQ1	A0A0C4DGQ5;P04632;K7ELJ7;K7EIV0;A0A075B7C0;K7EKD8;U3KQE2;K7EM73	Calpain small subunit 1	CAPNS1	tr|A0A0C4DGQ5|A0A0C4DGQ5_HUMAN Calpain small subunit 1 OS=Homo sapiens OX=9606 GN=CAPNS1 PE=1 SV=1;sp|P04632|CPNS1_HUMAN Calpain small subunit 1 OS=Homo sapiens OX=9606 GN=CAPNS1 PE=1 SV=1;tr|K7ELJ7|K7ELJ7_HUMAN Calpain small subunit 1 OS=Homo sapiens OX=9	12	7	7	2	1	2	4	6	4	6	6	5	2	1	2	4	6	4	6	6	5	42.2	42.2	33.786	322	322;268;278;196;197;238;161;163;100;248;72;94	0	150.42	12.1	4.7	12.1	33.9	40.1	20.2	38.2	40.1	36	2242800000	39600000	17119000	56058000	283320000	332010000	219320000	537180000
P42224;J3KPM9;E7EPD2;D2KFR9;E7ENM1;E9PH66;H7BZB5;H7BZ88	P42224;J3KPM9	Signal transducer and activator of transcription 1-alpha/beta;Signal transducer and activator of transcription	STAT1	sp|P42224|STAT1_HUMAN Signal transducer and activator of transcription 1-alpha/beta OS=Homo sapiens OX=9606 GN=STAT1 PE=1 SV=2;tr|J3KPM9|J3KPM9_HUMAN Signal transducer and activator of transcription OS=Homo sapiens OX=9606 GN=STAT1 PE=1 SV=1	8	26	26	0	0	0	20	18	17	18	21	17	0	0	0	20	18	17	18	21	17	43.7	43.7	87.334	750	750;714;180;193;150;69;58;40	0	149.23	0	0	0	34.1	32.7	31.3	32.8	35.9	32	6941800000	0	0	0	1053700000	1229100000	788010000	1291300000
Q99805	Q99805	Transmembrane 9 superfamily member 2	TM9SF2	sp|Q99805|TM9S2_HUMAN Transmembrane 9 superfamily member 2 OS=Homo sapiens OX=9606 GN=TM9SF2 PE=1 SV=1	1	16	16	0	0	0	12	13	10	13	13	15	0	0	0	12	13	10	13	13	15	29.7	29.7	75.775	663	663	0	149	0	0	0	23.2	25.5	21.6	25.3	25.5	29.7	12926000000	0	0	0	1657300000	1597800000	1153500000	2385000000
P12956;B1AHC9	P12956;B1AHC9	X-ray repair cross-complementing protein 6	XRCC6	sp|P12956|XRCC6_HUMAN X-ray repair cross-complementing protein 6 OS=Homo sapiens OX=9606 GN=XRCC6 PE=1 SV=2;tr|B1AHC9|B1AHC9_HUMAN X-ray repair cross-complementing protein 6 OS=Homo sapiens OX=9606 GN=XRCC6 PE=1 SV=1	2	25	25	8	2	2	16	15	13	13	14	18	8	2	2	16	15	13	13	14	18	56.8	56.8	69.842	609	609;559	0	148.95	13.6	4.4	5.1	36.9	31.7	29.1	26.1	29.9	37.4	8375100000	64683000	5517000	27330000	1373400000	1221900000	779130000	1979600000
P53618;E9PP73;E9PP63;E9PKQ1	P53618;E9PP73	Coatomer subunit beta	COPB1	sp|P53618|COPB_HUMAN Coatomer subunit beta OS=Homo sapiens OX=9606 GN=COPB1 PE=1 SV=3;tr|E9PP73|E9PP73_HUMAN Coatomer subunit beta (Fragment) OS=Homo sapiens OX=9606 GN=COPB1 PE=1 SV=8	4	35	35	7	1	1	26	24	18	24	29	29	7	1	1	26	24	18	24	29	29	48.6	48.6	107.14	953	953;485;132;137	0	148.72	11.8	1.9	2	36.9	35.9	31.8	34.6	38.1	46.5	14740000000	48769000	14559000	8669800	2208400000	2196600000	1512300000	2943500000
Q13409;A0A0A0MTG2;O14576	Q13409	Cytoplasmic dynein 1 intermediate chain 2	DYNC1I2	sp|Q13409|DC1I2_HUMAN Cytoplasmic dynein 1 intermediate chain 2 OS=Homo sapiens OX=9606 GN=DYNC1I2 PE=1 SV=3	3	11	5	2	1	1	6	6	7	8	7	9	1	0	0	1	1	2	3	2	3	34.5	19.1	71.456	638	638;544;645	0	148.68	7.5	3.3	3.3	17.2	17.2	21	24	22.1	26.6	2188200000	11466000	5803200	7271800	289910000	234270000	255580000	600100000
P30101	P30101	Protein disulfide-isomerase A3	PDIA3	sp|P30101|PDIA3_HUMAN Protein disulfide-isomerase A3 OS=Homo sapiens OX=9606 GN=PDIA3 PE=1 SV=4	1	24	19	9	7	5	15	15	18	17	19	15	6	6	2	11	11	16	14	14	13	54.5	45.3	56.782	505	505	0	148.26	20.6	14.3	12.1	34.7	33.1	43.6	42.4	39.8	41.4	12599000000	167700000	113540000	91615000	1391100000	1819400000	1741600000	2689200000
Q9Y263;E5RIM3;H0YBW4;H0YC16;H0YAU9	Q9Y263;E5RIM3	Phospholipase A-2-activating protein	PLAA	sp|Q9Y263|PLAP_HUMAN Phospholipase A-2-activating protein OS=Homo sapiens OX=9606 GN=PLAA PE=1 SV=2;tr|E5RIM3|E5RIM3_HUMAN Phospholipase A-2-activating protein OS=Homo sapiens OX=9606 GN=PLAA PE=1 SV=1	5	27	27	1	0	0	18	12	13	17	18	16	1	0	0	18	12	13	17	18	16	47.4	47.4	87.156	795	795;609;290;136;244	0	148	2.1	0	0	31.6	22.8	23.9	27.5	30.9	30.4	3512400000	2284200	0	0	487410000	415110000	364740000	781830000
P02751;H0Y7Z1;H0Y4K8	P02751;H0Y7Z1	Fibronectin;Anastellin;Ugl-Y1;Ugl-Y2;Ugl-Y3	FN1	sp|P02751|FINC_HUMAN Fibronectin OS=Homo sapiens OX=9606 GN=FN1 PE=1 SV=5;tr|H0Y7Z1|H0Y7Z1_HUMAN Fibronectin (Fragment) OS=Homo sapiens OX=9606 GN=FN1 PE=1 SV=1	3	29	29	1	5	2	20	19	11	13	16	13	1	5	2	20	19	11	13	16	13	20.2	20.2	272.32	2477	2477;1103;241	0	147.21	0.5	3.3	1.2	13.2	13.3	7.2	8.4	10.9	8.7	2501100000	3619500	40555000	12303000	433260000	398880000	220770000	402870000
F8WCF6;P59998;F8WDD7;A0A0A6YYG9;H7C0A3;F8WDW3;F8WE39;R4GN08	F8WCF6;P59998;F8WDD7;A0A0A6YYG9;H7C0A3	Actin-related protein 2/3 complex subunit 4	ARPC4-TTLL3;ARPC4	tr|F8WCF6|F8WCF6_HUMAN Actin-related protein 2/3 complex subunit 4 OS=Homo sapiens OX=9606 GN=ARPC4-TTLL3 PE=3 SV=1;sp|P59998|ARPC4_HUMAN Actin-related protein 2/3 complex subunit 4 OS=Homo sapiens OX=9606 GN=ARPC4 PE=1 SV=3;tr|F8WDD7|F8WDD7_HUMAN Actin-re	8	6	6	3	3	3	4	5	5	6	6	4	3	3	3	4	5	5	6	6	4	38.1	38.1	21.058	181	181;168;113;625;167;44;47;77	0	146.84	21	21	21	27.6	32	33.7	38.1	38.1	25.4	6017700000	70797000	34572000	110280000	644130000	910880000	773230000	1212600000
P68104;A0A087WVQ9;Q5VTE0;A0A087WV01;A6PW80;Q5JR01	P68104;A0A087WVQ9;Q5VTE0;A0A087WV01	Elongation factor 1-alpha 1;Putative elongation factor 1-alpha-like 3;Elongation factor 1-alpha	EEF1A1;EEF1A1P5	sp|P68104|EF1A1_HUMAN Elongation factor 1-alpha 1 OS=Homo sapiens OX=9606 GN=EEF1A1 PE=1 SV=1;tr|A0A087WVQ9|A0A087WVQ9_HUMAN Elongation factor 1-alpha 1 OS=Homo sapiens OX=9606 GN=EEF1A1 PE=1 SV=1;sp|Q5VTE0|EF1A3_HUMAN Putative elongation factor 1-alpha-li	6	24	15	9	8	9	20	20	20	16	21	19	5	4	5	12	12	13	10	13	12	60.6	39.8	50.14	462	462;441;462;426;106;145	0	145.94	29.2	22.1	29	59.7	56.5	50	40	59.7	55.4	315330000000	2241100000	1673000000	2661800000	50148000000	45775000000	38142000000	54870000000
Q9H3U1;A0A1W2PNX8	Q9H3U1;A0A1W2PNX8	Protein unc-45 homolog A	UNC45A	sp|Q9H3U1|UN45A_HUMAN Protein unc-45 homolog A OS=Homo sapiens OX=9606 GN=UNC45A PE=1 SV=1;tr|A0A1W2PNX8|A0A1W2PNX8_HUMAN Protein unc-45 homolog A OS=Homo sapiens OX=9606 GN=UNC45A PE=1 SV=1	2	31	31	0	1	0	22	21	17	20	21	23	0	1	0	22	21	17	20	21	23	45.9	45.9	103.08	944	944;1084	0	145.84	0	1.4	0	32.6	32.2	26	29.4	33.2	34.6	7238200000	0	1481500	0	1129800000	1025300000	683610000	1439100000
Q92896;H3BM42;H3BQU9;H3BQT1;H3BRD8	Q92896;H3BM42	Golgi apparatus protein 1	GLG1	sp|Q92896|GSLG1_HUMAN Golgi apparatus protein 1 OS=Homo sapiens OX=9606 GN=GLG1 PE=1 SV=2;tr|H3BM42|H3BM42_HUMAN Golgi apparatus protein 1 OS=Homo sapiens OX=9606 GN=GLG1 PE=1 SV=1	5	23	23	0	0	0	10	12	9	15	17	14	0	0	0	10	12	9	15	17	14	32.1	32.1	134.55	1179	1179;698;305;74;152	0	145.74	0	0	0	16.6	17.6	12.5	21.7	22.8	18.9	3408900000	0	0	0	442070000	479750000	266260000	855890000
Q14980;A0A087WY61;F5H4J1;F5H6Y5;H0YFY6;K4DIE0;F5H763;F5H7R5;F5H4Y4;F5GWA2;F5GWK2;F5H073;F5H068;F8W6T3;F5H1L0;F5GZW1;F5H2F3;F5H3L6;F5H0Z7	Q14980;A0A087WY61;F5H4J1	Nuclear mitotic apparatus protein 1	NUMA1	sp|Q14980|NUMA1_HUMAN Nuclear mitotic apparatus protein 1 OS=Homo sapiens OX=9606 GN=NUMA1 PE=1 SV=2;tr|A0A087WY61|A0A087WY61_HUMAN Nuclear mitotic apparatus protein 1 OS=Homo sapiens OX=9606 GN=NUMA1 PE=1 SV=1;tr|F5H4J1|F5H4J1_HUMAN Nuclear mitotic appara	19	34	34	3	3	3	20	16	14	18	15	17	3	3	3	20	16	14	18	15	17	24.7	24.7	238.26	2115	2115;2099;851;691;964;353;220;56;59;61;72;75;82;91;109;146;159;174;201	0	145.68	2.1	2.1	2.4	15.1	11.5	9.9	13.1	10.7	12.1	2756800000	10485000	13928000	15592000	432960000	422040000	391380000	433470000
P12882	P12882	Myosin-1	MYH1	sp|P12882|MYH1_HUMAN Myosin-1 OS=Homo sapiens OX=9606 GN=MYH1 PE=1 SV=3	1	27	3	0	0	0	1	0	26	0	0	1	0	0	0	0	0	3	0	0	0	16.8	2.1	223.14	1939	1939	0	145.56	0	0	0	0.5	0	16.3	0	0	0.6	1915100000	0	0	0	0	0	1758600000	0
P61221;D6R9I9;D6RGF4;H0Y990	P61221;D6R9I9	ATP-binding cassette sub-family E member 1	ABCE1	sp|P61221|ABCE1_HUMAN ATP-binding cassette sub-family E member 1 OS=Homo sapiens OX=9606 GN=ABCE1 PE=1 SV=1;tr|D6R9I9|D6R9I9_HUMAN ATP-binding cassette sub-family E member 1 OS=Homo sapiens OX=9606 GN=ABCE1 PE=1 SV=1	4	18	18	2	1	2	13	11	9	10	13	13	2	1	2	13	11	9	10	13	13	37.4	37.4	67.314	599	599;421;210;147	0	145.33	5	1.7	7.5	27	26	20.9	23.7	27.5	30.6	4385000000	14389000	0	18374000	537890000	622540000	417140000	970970000
A0A1C7CYX9;Q16555;E5RFU4	A0A1C7CYX9;Q16555	Dihydropyrimidinase-related protein 2	DPYSL2	tr|A0A1C7CYX9|A0A1C7CYX9_HUMAN Dihydropyrimidinase-related protein 2 OS=Homo sapiens OX=9606 GN=DPYSL2 PE=1 SV=1;sp|Q16555|DPYL2_HUMAN Dihydropyrimidinase-related protein 2 OS=Homo sapiens OX=9606 GN=DPYSL2 PE=1 SV=1	3	24	21	8	6	7	15	10	18	12	15	15	6	5	6	13	9	16	10	13	12	52.3	45.1	73.502	677	677;572;170	0	145.21	22	13.6	19.1	38.6	26.4	40.9	31.3	37.1	37.1	12033000000	110830000	73532000	121430000	1435200000	1032400000	3973900000	1673600000
Q8WUM4;A0A3B3IT07;C9IZF9;F8WEQ7;F8WBR8;F8WDK9	Q8WUM4	Programmed cell death 6-interacting protein	PDCD6IP	sp|Q8WUM4|PDC6I_HUMAN Programmed cell death 6-interacting protein OS=Homo sapiens OX=9606 GN=PDCD6IP PE=1 SV=1	6	19	19	3	2	3	14	13	10	15	12	13	3	2	3	14	13	10	15	12	13	33.8	33.8	96.022	868	868;300;153;72;78;95	0	144.68	5.8	4.7	4.6	23.4	24.1	18.7	28.5	23.4	25	3710500000	5156300	3516500	18193000	458180000	471130000	290640000	1109800000
B0QY89;Q9Y262;B0QY90;C9JHP4;C9K0Q7;H7C3A0;H0Y7E6	B0QY89;Q9Y262;B0QY90	Eukaryotic translation initiation factor 3 subunit L	EIF3L	tr|B0QY89|B0QY89_HUMAN Eukaryotic translation initiation factor 3 subunit L OS=Homo sapiens OX=9606 GN=EIF3L PE=1 SV=1;sp|Q9Y262|EIF3L_HUMAN Eukaryotic translation initiation factor 3 subunit L OS=Homo sapiens OX=9606 GN=EIF3L PE=1 SV=1;tr|B0QY90|B0QY90_HU	7	18	18	4	6	3	15	10	13	13	14	14	4	6	3	15	10	13	13	14	14	35.6	35.6	70.901	607	607;564;466;150;183;127;109	0	144.26	9.7	13	8.1	29.8	19.4	27.5	28.2	29.8	28.5	6747600000	8411900	21256000	19460000	1113900000	702170000	943010000	1129400000
P49411;H3BNU3	P49411	Elongation factor Tu, mitochondrial	TUFM	sp|P49411|EFTU_HUMAN Elongation factor Tu, mitochondrial OS=Homo sapiens OX=9606 GN=TUFM PE=1 SV=2	2	25	25	7	8	8	20	18	18	19	20	16	7	8	8	20	18	18	19	20	16	61.9	61.9	49.541	452	452;101	0	144.22	17	16.8	23.2	58	55.1	55.8	57.1	56.2	53.1	16098000000	41481000	95499000	97444000	2654300000	2628600000	1817700000	3252300000
P05556;C9JPK5;Q5T3E6;E9PLR6;E7EUI6;E7EQW5;H7C4N8;E7ERX5;C9JJP8;Q5T3E5;E9PQJ2	P05556	Integrin beta-1	ITGB1	sp|P05556|ITB1_HUMAN Integrin beta-1 OS=Homo sapiens OX=9606 GN=ITGB1 PE=1 SV=2	11	18	18	1	1	3	15	14	15	16	13	16	1	1	3	15	14	15	16	13	16	33.5	33.5	88.414	798	798;98;136;143;152;163;108;124;31;89;104	0	144.02	2	2	5.4	25.6	24.7	27.6	27.3	21.2	30.5	41246000000	3666000	5069400	22886000	6218000000	5360000000	4864200000	8169900000
P62424;Q5T8U2;Q5T8U3	P62424;Q5T8U2;Q5T8U3	60S ribosomal protein L7a	RPL7A	sp|P62424|RL7A_HUMAN 60S ribosomal protein L7a OS=Homo sapiens OX=9606 GN=RPL7A PE=1 SV=2;tr|Q5T8U2|Q5T8U2_HUMAN 60S ribosomal protein L7a OS=Homo sapiens OX=9606 GN=RPL7A PE=1 SV=1;tr|Q5T8U3|Q5T8U3_HUMAN 60S ribosomal protein L7a (Fragment) OS=Homo sapien	3	17	17	11	11	10	14	12	10	10	10	10	11	11	10	14	12	10	10	10	10	46.2	46.2	29.995	266	266;151;191	0	143.68	36.8	37.2	33.5	41.4	33.8	31.2	26.3	26.7	30.1	16863000000	490400000	441150000	575380000	2692700000	2272300000	1601700000	2980300000
F5H365;Q15436;G3V4V1;G3V1W4;G3V3G5;G3V2R6;G3V5X8;G3V4Q2;G3V5K1;A0A2R8YF30;A0A2R8Y633;A0A2R8Y7S7	F5H365;Q15436	Protein transport protein Sec23A	SEC23A	tr|F5H365|F5H365_HUMAN Protein transport protein SEC23 OS=Homo sapiens OX=9606 GN=SEC23A PE=1 SV=1;sp|Q15436|SC23A_HUMAN Protein transport protein Sec23A OS=Homo sapiens OX=9606 GN=SEC23A PE=1 SV=2	12	22	20	1	3	2	15	14	13	15	16	13	1	3	2	14	14	12	14	14	12	41.4	38.5	82.968	736	736;765;93;108;140;169;85;86;40;32;52;59	0	143.56	1.8	5.6	3.7	27.4	26	25	26.8	29.1	27.2	5555700000	9023600	17401000	1902100	726080000	558700000	606090000	1268800000
P25705;K7EK77;K7ERX7;K7EJP1;K7EQH4;K7ENJ4;K7ESA0;REV__C9JJM9;REV__C9JD81;REV__C9J3W7;REV__C9JBN7;REV__C9JEW7;REV__F8WDL9;REV__C9J718;REV__C9JF32;REV__A0A0C4DG23;REV__C9JRT6;REV__F8WDB6;REV__Q9Y5A7;REV__H3BM14;REV__H3BM74;REV__A0A3B3ITR4;REV__O00522	P25705;K7EK77	ATP synthase subunit alpha, mitochondrial	ATP5A1	sp|P25705|ATPA_HUMAN ATP synthase subunit alpha, mitochondrial OS=Homo sapiens OX=9606 GN=ATP5F1A PE=1 SV=1;tr|K7EK77|K7EK77_HUMAN ATP synthase subunit alpha, mitochondrial (Fragment) OS=Homo sapiens OX=9606 GN=ATP5F1A PE=1 SV=1	23	26	26	15	14	10	21	21	19	19	22	20	15	14	10	21	21	19	19	22	20	56.8	56.8	59.75	553	553;207;205;144;111;199;77;58;65;69;97;112;149;162;184;243;254;267;615;625;639;708;736	0	142.91	37.4	31.6	25.1	48.5	50.5	48.6	40.5	53.2	50.5	38917000000	550040000	953160000	387700000	5179000000	4588500000	5923600000	5362000000
P25398	P25398	40S ribosomal protein S12	RPS12	sp|P25398|RS12_HUMAN 40S ribosomal protein S12 OS=Homo sapiens OX=9606 GN=RPS12 PE=1 SV=3	1	7	7	4	5	3	7	6	5	5	6	4	4	5	3	7	6	5	5	6	4	56.8	56.8	14.515	132	132	0	142.52	31.8	45.5	25	56.8	49.2	41.7	41.7	49.2	37.9	5058200000	71585000	32618000	47322000	898370000	628080000	459240000	1043200000
Q92621;U3KPX2;U3KQ97;U3KQ47	Q92621	Nuclear pore complex protein Nup205	NUP205	sp|Q92621|NU205_HUMAN Nuclear pore complex protein Nup205 OS=Homo sapiens OX=9606 GN=NUP205 PE=1 SV=3	4	30	30	0	0	0	16	15	14	13	21	20	0	0	0	16	15	14	13	21	20	23.4	23.4	227.92	2012	2012;273;184;71	0	142.47	0	0	0	12.7	12.3	10.1	10	17.7	15.1	3916300000	0	0	0	553750000	529910000	409560000	698410000
O75534;E9PLT0;E9PLD4;E9PKN4	O75534;E9PLT0	Cold shock domain-containing protein E1	CSDE1	sp|O75534|CSDE1_HUMAN Cold shock domain-containing protein E1 OS=Homo sapiens OX=9606 GN=CSDE1 PE=1 SV=2;tr|E9PLT0|E9PLT0_HUMAN Cold shock domain-containing protein E1 OS=Homo sapiens OX=9606 GN=CSDE1 PE=1 SV=1	4	12	12	0	1	0	9	7	5	7	8	4	0	1	0	9	7	5	7	8	4	22.6	22.6	88.884	798	798;668;94;46	0	142.35	0	1.5	0	16.9	13	10.4	14	14	9.4	1172100000	0	1959800	0	242860000	163430000	128260000	246920000
P54920;M0R0Y2;M0R2M1;M0R058;M0R213;M0R027;M0R0I4;M0QZM9;M0QZN5;M0R031	P54920;M0R0Y2;M0R2M1	Alpha-soluble NSF attachment protein	NAPA	sp|P54920|SNAA_HUMAN Alpha-soluble NSF attachment protein OS=Homo sapiens OX=9606 GN=NAPA PE=1 SV=3;tr|M0R0Y2|M0R0Y2_HUMAN Alpha-soluble NSF attachment protein OS=Homo sapiens OX=9606 GN=NAPA PE=1 SV=1;tr|M0R2M1|M0R2M1_HUMAN Alpha-soluble NSF attachment pr	10	14	11	1	2	0	11	9	9	12	9	9	1	2	0	9	6	6	9	6	6	64.7	53.2	33.232	295	295;256;268;137;83;102;139;35;60;74	0	142.04	6.1	7.5	0	53.2	40	46.4	52.9	44.4	42.7	2004700000	0	25389000	0	275820000	224930000	179490000	444390000
P27797;K7EJB9;K7EL50	P27797;K7EJB9	Calreticulin	CALR	sp|P27797|CALR_HUMAN Calreticulin OS=Homo sapiens OX=9606 GN=CALR PE=1 SV=1;tr|K7EJB9|K7EJB9_HUMAN Calreticulin (Fragment) OS=Homo sapiens OX=9606 GN=CALR PE=1 SV=1	3	12	12	4	6	3	10	10	10	10	11	10	4	6	3	10	10	10	10	11	10	46.3	46.3	48.141	417	417;247;163	0	141.26	18.7	24.9	12.5	37.4	42.9	42.9	42.9	43.2	43.2	9497500000	107670000	149070000	118410000	1171600000	1531400000	854720000	1923800000
P34897;H0YIZ0;G3V2Y4;G3V5L0;G3V4W5;G3V540;G3V241;G3V3Y8;G3V4T0;G3V4X0;G3V2W0;G3V2E4;G3V2D2;G3V2Y1;G3V3C6;P34896	P34897;H0YIZ0;G3V2Y4	Serine hydroxymethyltransferase, mitochondrial;Serine hydroxymethyltransferase	SHMT2	sp|P34897|GLYM_HUMAN Serine hydroxymethyltransferase, mitochondrial OS=Homo sapiens OX=9606 GN=SHMT2 PE=1 SV=3;tr|H0YIZ0|H0YIZ0_HUMAN Serine hydroxymethyltransferase, mitochondrial (Fragment) OS=Homo sapiens OX=9606 GN=SHMT2 PE=1 SV=1;tr|G3V2Y4|G3V2Y4_HUMA	16	17	17	7	2	7	13	11	8	11	13	8	7	2	7	13	11	8	11	13	8	41.7	41.7	55.992	504	504;264;234;215;237;192;142;147;149;159;160;171;52;65;86;483	0	139.69	19	5.4	18.1	33.9	29.8	20.2	29.8	33.7	22.8	3233800000	64101000	16030000	72482000	700410000	337120000	207350000	611230000
Q02878;F8VZ45;U3KQR5;F8VR69;F8VZA3;F8VWR1;F8VU16	Q02878	60S ribosomal protein L6	RPL6	sp|Q02878|RL6_HUMAN 60S ribosomal protein L6 OS=Homo sapiens OX=9606 GN=RPL6 PE=1 SV=3	7	15	15	13	11	12	11	9	9	9	10	10	13	11	12	11	9	9	9	10	10	42.7	42.7	32.728	288	288;159;160;63;105;118;120	0	139.64	39.9	34	39.9	37.2	32.6	32.6	34.7	35.4	35.4	28650000000	2033300000	2057600000	2875900000	4984100000	2911800000	2685700000	2677600000
D6REX3;O94979;D6RHZ5;H7BXG7;H0YAB3;H0Y8V7;H0Y9T9;H0Y9K1;D6RE64;D6RCQ9;H0Y8W8;H0YAF5;H0Y9V3	D6REX3;O94979;D6RHZ5;H7BXG7;H0YAB3	Protein transport protein Sec31A	SEC31A	tr|D6REX3|D6REX3_HUMAN Protein transport protein Sec31A OS=Homo sapiens OX=9606 GN=SEC31A PE=1 SV=1;sp|O94979|SC31A_HUMAN Protein transport protein Sec31A OS=Homo sapiens OX=9606 GN=SEC31A PE=1 SV=3;tr|D6RHZ5|D6RHZ5_HUMAN Protein transport protein Sec31A O	13	19	19	2	3	2	13	14	10	12	16	14	2	3	2	13	14	10	12	16	14	19.9	19.9	136.22	1251	1251;1220;877;969;443;285;235;237;164;166;383;181;219	0	139.55	1.8	3	2	16.1	15.7	13.1	12.9	17.5	14.5	5870200000	13147000	15610000	12009000	717630000	851270000	458080000	1185700000
P62906	P62906	60S ribosomal protein L10a	RPL10A	sp|P62906|RL10A_HUMAN 60S ribosomal protein L10a OS=Homo sapiens OX=9606 GN=RPL10A PE=1 SV=2	1	11	11	3	2	2	9	9	9	8	10	9	3	2	2	9	9	9	8	10	9	46.1	46.1	24.831	217	217	0	139.52	18.9	11.1	13.4	40.6	42.4	42.4	38.7	42.4	38.7	14072000000	16354000	17865000	15672000	2293800000	1955500000	1638100000	2211700000
Q15043;E5RIP4;E5RFZ8;E5RGA7;E5RJ40;E5RJG5;E5RFT1	Q15043;E5RIP4;E5RFZ8;E5RGA7;E5RJ40;E5RJG5	Zinc transporter ZIP14	SLC39A14	sp|Q15043|S39AE_HUMAN Zinc transporter ZIP14 OS=Homo sapiens OX=9606 GN=SLC39A14 PE=1 SV=3;tr|E5RIP4|E5RIP4_HUMAN Zinc transporter ZIP14 (Fragment) OS=Homo sapiens OX=9606 GN=SLC39A14 PE=1 SV=2;tr|E5RFZ8|E5RFZ8_HUMAN Zinc transporter ZIP14 (Fragment) OS=Ho	7	4	4	1	1	1	3	4	3	3	4	3	1	1	1	3	4	3	3	4	3	13.6	13.6	54.212	492	492;155;89;90;122;127;201	0	139.43	2.6	2.6	2.6	9.1	13.6	9.1	9.6	13.6	9.1	2714500000	0	1887400	0	349610000	584260000	265650000	397600000
Q9UHD8;K7EJ51;K7ENL0;K7EL40;K7EJV0;K7EPY1;K7EK18;K7ER52;K7EIE4;K7ER14;K7EQD7;K7EJL9;K7ERG1;K7ER34	Q9UHD8	Septin-9	SEPT9	sp|Q9UHD8|SEPT9_HUMAN Septin-9 OS=Homo sapiens OX=9606 GN=SEPTIN9 PE=1 SV=2	14	18	18	3	2	3	12	11	10	14	12	11	3	2	3	12	11	10	14	12	11	39.4	39.4	65.401	586	586;134;152;209;125;151;195;151;157;159;165;189;35;90	0	139.16	5.5	4.6	5.8	32.6	31.2	28	32.6	30.7	30	5328600000	30454000	17544000	39404000	1038700000	793860000	548440000	1172200000
Q92945;A0A087WTP3;M0R0I5;M0QYH3;M0R0C6;M0QYG1;M0QXW7;M0R3J3;M0R251;M0R263	Q92945;A0A087WTP3	Far upstream element-binding protein 2	KHSRP	sp|Q92945|FUBP2_HUMAN Far upstream element-binding protein 2 OS=Homo sapiens OX=9606 GN=KHSRP PE=1 SV=4;tr|A0A087WTP3|A0A087WTP3_HUMAN Far upstream element-binding protein 2 OS=Homo sapiens OX=9606 GN=KHSRP PE=1 SV=1	10	21	21	5	3	1	15	14	12	13	17	13	5	3	1	15	14	12	13	17	13	42.5	42.5	73.114	711	711;711;279;169;176;114;116;269;79;143	0	138.89	12.1	4.8	2	32.9	29.4	31.1	25.9	38.1	32.1	4820800000	35879000	12927000	6218400	641080000	732200000	432850000	1021100000
Q92797;A0A087WUE9;M0R3C7;M0QXP5;M0R1C2;M0R180;M0R039	Q92797;A0A087WUE9;M0R3C7	Symplekin	SYMPK	sp|Q92797|SYMPK_HUMAN Symplekin OS=Homo sapiens OX=9606 GN=SYMPK PE=1 SV=2;tr|A0A087WUE9|A0A087WUE9_HUMAN Symplekin OS=Homo sapiens OX=9606 GN=SYMPK PE=1 SV=1;tr|M0R3C7|M0R3C7_HUMAN Symplekin OS=Homo sapiens OX=9606 GN=SYMPK PE=1 SV=1	7	22	22	0	0	0	16	18	17	14	19	14	0	0	0	16	18	17	14	19	14	27	27	141.15	1274	1274;1058;673;142;115;137;50	0	138.13	0	0	0	22.9	22.9	22.1	19.2	23.5	19.5	6199700000	0	0	0	896060000	805910000	657620000	1012100000
Q5T092;A0A0A0MR06;Q5T091;O15258;Q5T093	Q5T092;A0A0A0MR06;Q5T091;O15258;Q5T093	Protein RER1	RER1	tr|Q5T092|Q5T092_HUMAN Protein RER1 (Fragment) OS=Homo sapiens OX=9606 GN=RER1 PE=1 SV=1;tr|A0A0A0MR06|A0A0A0MR06_HUMAN Protein RER1 (Fragment) OS=Homo sapiens OX=9606 GN=RER1 PE=1 SV=1;tr|Q5T091|Q5T091_HUMAN Protein RER1 OS=Homo sapiens OX=9606 GN=RER1 PE	5	4	4	1	2	0	2	2	3	2	4	3	1	2	0	2	2	3	2	4	3	36.7	36.7	18.388	158	158;177;187;196;117	0	137.51	12	23.4	0	23.4	23.4	29.7	23.4	36.7	30.4	2306100000	0	8068800	0	284080000	271560000	182610000	506420000
O60443;C9JSR4;H7C147;H7BZJ0	O60443;C9JSR4	Non-syndromic hearing impairment protein 5	DFNA5	sp|O60443|GSDME_HUMAN Gasdermin-E OS=Homo sapiens OX=9606 GN=GSDME PE=1 SV=2;tr|C9JSR4|C9JSR4_HUMAN Gasdermin-E OS=Homo sapiens OX=9606 GN=GSDME PE=1 SV=2	4	12	12	1	1	1	10	11	11	10	11	10	1	1	1	10	11	11	10	11	10	34.7	34.7	54.554	496	496;356;192;155	0	137.3	2.8	2.8	2.8	32.7	34.7	34.7	27.4	32.3	30	5068200000	2436800	2684700	3094300	800640000	758350000	552430000	966640000
Q13835	Q13835	Plakophilin-1	PKP1	sp|Q13835|PKP1_HUMAN Plakophilin-1 OS=Homo sapiens OX=9606 GN=PKP1 PE=1 SV=2	1	17	17	13	6	12	6	2	3	2	3	5	13	6	12	6	2	3	2	3	5	32	32	82.86	747	747	0	136.44	24.5	11	23.6	12.9	5.2	6.6	5.2	7.4	9.9	1172700000	236930000	72789000	253270000	76705000	28650000	93310000	75385000
F8VY35;F5H4R6;P55209;F8W0J6;F8VUX1;H0YIV4;F8W020;F8VV59;F8W543;B7Z9C2;F8VVB5;F8W118;F8VXI6;H0YH88;H0YHC3;F8VRJ2;B7Z4K9	F8VY35;F5H4R6;P55209;F8W0J6;F8VUX1;H0YIV4;F8W020;F8VV59;F8W543;B7Z9C2;F8VVB5;F8W118;F8VXI6;H0YH88;H0YHC3	Nucleosome assembly protein 1-like 1	NAP1L1	tr|F8VY35|F8VY35_HUMAN Nucleosome assembly protein 1-like 1 (Fragment) OS=Homo sapiens OX=9606 GN=NAP1L1 PE=1 SV=1;tr|F5H4R6|F5H4R6_HUMAN Nucleosome assembly protein 1-like 1 OS=Homo sapiens OX=9606 GN=NAP1L1 PE=1 SV=1;sp|P55209|NP1L1_HUMAN Nucleosome asse	17	14	12	0	0	1	10	8	11	9	8	7	0	0	1	9	6	9	7	7	6	76.1	72.3	31.02	264	264;383;391;379;237;385;207;327;328;349;161;209;215;177;198;114;208	0	136.07	0	0	6.4	64.8	51.9	75	52.3	53.4	46.6	5541500000	0	0	10888000	796290000	942910000	913270000	845680000
P22102;F8WD69;C9JBJ1;C9JTV6;C9JZG2;C9JKQ7;A0A140TA71;H7C366	P22102	Trifunctional purine biosynthetic protein adenosine-3;Phosphoribosylamine--glycine ligase;Phosphoribosylformylglycinamidine cyclo-ligase;Phosphoribosylglycinamide formyltransferase	GART	sp|P22102|PUR2_HUMAN Trifunctional purine biosynthetic protein adenosine-3 OS=Homo sapiens OX=9606 GN=GART PE=1 SV=1	8	29	29	2	1	1	22	19	19	21	21	19	2	1	1	22	19	19	21	21	19	49.5	49.5	107.77	1010	1010;306;231;241;136;138;223;145	0	135.97	3	1.4	2.7	39.7	31.8	30.1	34	37.4	31.9	7733000000	13528000	6203000	8986200	1137500000	1039800000	941250000	1806600000
O00429;F8VZ52;B4DPZ9;F8VUJ9;B4DDQ3;F8W1W3	O00429	Dynamin-1-like protein	DNM1L	sp|O00429|DNM1L_HUMAN Dynamin-1-like protein OS=Homo sapiens OX=9606 GN=DNM1L PE=1 SV=2	6	20	20	0	2	0	17	14	13	16	14	12	0	2	0	17	14	13	16	14	12	39.8	39.8	81.876	736	736;261;156;172;180;168	0	135.47	0	3.7	0	34.9	29.3	26.9	33.3	29.1	26.5	3278200000	0	6000500	0	460220000	270380000	394050000	887110000
Q8N6T3;E5RHT6;E5RHC5;F8W1U7;F8VWH9;F8VWB3;E5RGL6;E5RHH7;E5RIU2;H0YIQ0	Q8N6T3;E5RHT6;E5RHC5;F8W1U7;F8VWH9	ADP-ribosylation factor GTPase-activating protein 1	ARFGAP1	sp|Q8N6T3|ARFG1_HUMAN ADP-ribosylation factor GTPase-activating protein 1 OS=Homo sapiens OX=9606 GN=ARFGAP1 PE=1 SV=2;tr|E5RHT6|E5RHT6_HUMAN ADP-ribosylation factor GTPase-activating protein 1 (Fragment) OS=Homo sapiens OX=9606 GN=ARFGAP1 PE=1 SV=2;tr|E5R	10	8	8	0	0	0	5	4	1	2	2	5	0	0	0	5	4	1	2	2	5	32.5	32.5	44.667	406	406;244;261;271;340;122;130;153;79;104	0	133.99	0	0	0	20.2	16	3.7	8.4	7.9	20.7	877480000	0	0	0	287210000	139300000	52621000	153490000
O15031;A6QRG9;A0A087WU36;H0YAM9;F5H3A2;B4DHQ7;O60486	O15031	Plexin-B2	PLXNB2	sp|O15031|PLXB2_HUMAN Plexin-B2 OS=Homo sapiens OX=9606 GN=PLXNB2 PE=1 SV=3	7	20	19	0	0	0	13	8	13	12	11	12	0	0	0	12	8	13	11	10	12	15	14.6	205.12	1838	1838;234;347;231;307;615;1568	0	133	0	0	0	9.2	6.1	9.4	8.2	8.9	10.3	4944600000	0	0	0	895060000	615500000	724670000	861760000
Q9BQG0;I3L1L3;I3L311;I3L2H8	Q9BQG0;I3L1L3	Myb-binding protein 1A	MYBBP1A	sp|Q9BQG0|MBB1A_HUMAN Myb-binding protein 1A OS=Homo sapiens OX=9606 GN=MYBBP1A PE=1 SV=2;tr|I3L1L3|I3L1L3_HUMAN Myb-binding protein 1A (Fragment) OS=Homo sapiens OX=9606 GN=MYBBP1A PE=1 SV=1	4	26	26	0	0	0	18	14	12	17	23	17	0	0	0	18	14	12	17	23	17	26.4	26.4	148.85	1328	1328;1252;69;204	0	132.32	0	0	0	21	14.1	12.7	18.8	24.7	17	3364400000	0	0	0	541350000	400200000	200420000	663920000
D3YTB1;F8W727;P62910;D3YTI8	D3YTB1;F8W727;P62910	60S ribosomal protein L32	RPL32	tr|D3YTB1|D3YTB1_HUMAN 60S ribosomal protein L32 (Fragment) OS=Homo sapiens OX=9606 GN=RPL32 PE=1 SV=1;tr|F8W727|F8W727_HUMAN 60S ribosomal protein L32 OS=Homo sapiens OX=9606 GN=RPL32 PE=1 SV=1;sp|P62910|RL32_HUMAN 60S ribosomal protein L32 OS=Homo sapien	4	12	12	9	10	9	7	7	8	6	8	8	9	10	9	7	7	8	6	8	8	51.1	51.1	15.616	133	133;153;135;62	0	132.08	38.3	49.6	38.3	36.1	36.1	36.8	30.1	36.8	42.1	47803000000	2943400000	3316000000	5675100000	6859200000	5427500000	5791500000	4553500000
Q13190;E9PNU4;H7C3X5;E9PP18;E9PRW9;H0YEJ8	Q13190;E9PNU4	Syntaxin-5	STX5	sp|Q13190|STX5_HUMAN Syntaxin-5 OS=Homo sapiens OX=9606 GN=STX5 PE=1 SV=2;tr|E9PNU4|E9PNU4_HUMAN Syntaxin-5 OS=Homo sapiens OX=9606 GN=STX5 PE=1 SV=1	6	9	9	0	0	0	7	5	5	7	8	5	0	0	0	7	5	5	7	8	5	45.1	45.1	39.672	355	355;250;158;78;81;67	0	131.88	0	0	0	32.7	26.5	26.5	40	42.3	26.8	2685200000	0	0	0	238000000	338270000	253030000	643510000
E7ES33;E7EPK1;Q16181;G3V1Q4;A0A0U1RRE1;A0A0U1RRH9;A0A5F9ZGZ7;A0A0U1RRM2;A0A0U1RRD1;Q5JXL7;Q6ZU15	E7ES33;E7EPK1;Q16181;G3V1Q4	Septin-7	SEPT7	tr|E7ES33|E7ES33_HUMAN Septin-7 OS=Homo sapiens OX=9606 GN=SEPTIN7 PE=1 SV=3;tr|E7EPK1|E7EPK1_HUMAN Septin-7 OS=Homo sapiens OX=9606 GN=SEPTIN7 PE=1 SV=2;sp|Q16181|SEPT7_HUMAN Septin-7 OS=Homo sapiens OX=9606 GN=SEPTIN7 PE=1 SV=2;tr|G3V1Q4|G3V1Q4_HUMAN Sep	11	15	14	4	2	2	9	9	10	10	9	12	4	2	2	9	9	9	10	9	11	40	36.2	48.715	417	417;437;437;401;157;147;174;111;77;88;432	0	131.47	11.5	4.1	6.7	19.2	22.5	28.5	27.8	21.6	35	5812200000	14110000	14348000	6191900	760370000	899300000	931310000	1130900000
Q29RF7;H0Y9L6;H0Y9L9	Q29RF7	Sister chromatid cohesion protein PDS5 homolog A	PDS5A	sp|Q29RF7|PDS5A_HUMAN Sister chromatid cohesion protein PDS5 homolog A OS=Homo sapiens OX=9606 GN=PDS5A PE=1 SV=1	3	22	20	0	0	0	9	10	6	14	13	6	0	0	0	8	9	5	12	13	5	25.5	23.6	150.83	1337	1337;126;165	0	130.9	0	0	0	10	11.5	7.2	17.1	15.9	6.4	1371000000	0	0	0	241600000	162820000	92307000	298940000
P35606;D6RBT6;H0YAC7;D6R997;D6RBZ7;D6RCL6;D6RBG7;H0Y938	P35606	Coatomer subunit beta	COPB2	sp|P35606|COPB2_HUMAN Coatomer subunit beta OS=Homo sapiens OX=9606 GN=COPB2 PE=1 SV=2	8	32	32	6	5	4	21	19	24	22	20	21	6	5	4	21	19	24	22	20	21	48.9	48.9	102.49	906	906;111;118;152;77;86;89;177	0	130.11	9.8	7.8	7	35	29.4	38.1	35.9	34	35.8	10443000000	52072000	33925000	34738000	1614200000	1354700000	1359800000	1987600000
P23528;E9PP50;G3V1A4;E9PK25;E9PS23;E9PQB7;E9PLJ3	P23528;E9PP50;G3V1A4;E9PK25;E9PS23;E9PQB7	Cofilin-1	CFL1	sp|P23528|COF1_HUMAN Cofilin-1 OS=Homo sapiens OX=9606 GN=CFL1 PE=1 SV=3;tr|E9PP50|E9PP50_HUMAN Cofilin-1 (Fragment) OS=Homo sapiens OX=9606 GN=CFL1 PE=1 SV=8;tr|G3V1A4|G3V1A4_HUMAN Cofilin 1 (Non-muscle), isoform CRA_a OS=Homo sapiens OX=9606 GN=CFL1 PE=1	7	15	12	9	7	8	10	11	12	10	12	12	8	6	7	9	10	10	9	11	9	74.7	56	18.502	166	166;159;149;204;90;122;79	0	128.32	57.8	47	54.2	61.4	61.4	71.7	61.4	61.4	74.7	40437000000	529010000	263260000	804410000	4953100000	4977500000	5260200000	7629500000
A0A024R4E5;Q00341;H0Y394;H7C0A4;C9JIZ1;C9J5E5;C9JZI8;C9JHS7;C9JHZ8;C9JES8;C9JT62;C9JK79;H7C2D1;C9JBS3;C9JEJ8;C9JHN6;H7BZC3;C9JQ82;C9JMQ6;C9JHS9;C9J739	A0A024R4E5;Q00341;H0Y394	Vigilin	HDLBP	tr|A0A024R4E5|A0A024R4E5_HUMAN High density lipoprotein binding protein (Vigilin), isoform CRA_a OS=Homo sapiens OX=9606 GN=HDLBP PE=1 SV=1;sp|Q00341|VIGLN_HUMAN Vigilin OS=Homo sapiens OX=9606 GN=HDLBP PE=1 SV=2;tr|H0Y394|H0Y394_HUMAN Vigilin (Fragment) O	21	32	32	5	5	4	24	22	16	21	23	15	5	5	4	24	22	16	21	23	15	37.8	37.8	141.44	1268	1268;1268;973;332;224;221;164;126;141;147;96;128;308;69;79;81;267;53;46;17;19	0	127.21	7.6	5.4	5	30.8	28.5	20.3	25.2	27.8	19.6	6109200000	28126000	21467000	22795000	980560000	805900000	515900000	1483900000
H3BPE1;H3BQK9;Q9UPN3;A0A590UJG2;H0Y390;E9PNZ4;A0A5F9ZGX0;E9PLY5;E9PLY0;H0Y314;H0Y6T5;H0Y4F5;H0Y7I1	H3BPE1;H3BQK9;Q9UPN3;A0A590UJG2;H0Y390	Microtubule-actin cross-linking factor 1, isoforms 1/2/3/5	MACF1	tr|H3BPE1|H3BPE1_HUMAN Microtubule-actin cross-linking factor 1, isoforms 1/2/3/5 OS=Homo sapiens OX=9606 GN=MACF1 PE=1 SV=1;tr|H3BQK9|H3BQK9_HUMAN Microtubule-actin cross-linking factor 1, isoforms 1/2/3/5 OS=Homo sapiens OX=9606 GN=MACF1 PE=1 SV=1;sp|Q9U	13	30	29	0	1	0	16	16	9	17	17	13	0	0	0	16	15	8	17	16	13	5.5	5.4	856.87	7555	7555;7592;7388;5379;4434;2028;2146;1375;1062;543;368;455;159	0	126.51	0	0.1	0	2.8	3	1.5	3.2	3.1	2.5	1197700000	0	0	0	113540000	119000000	71210000	369510000
P11766;H0YAG8;D6RFE4;D6R9G2;D6RAY0	P11766;H0YAG8	Alcohol dehydrogenase class-3	ADH5	sp|P11766|ADHX_HUMAN Alcohol dehydrogenase class-3 OS=Homo sapiens OX=9606 GN=ADH5 PE=1 SV=4;tr|H0YAG8|H0YAG8_HUMAN Alcohol dehydrogenase class-3 (Fragment) OS=Homo sapiens OX=9606 GN=ADH5 PE=1 SV=1	5	11	11	1	2	3	8	7	7	10	10	8	1	2	3	8	7	7	10	10	8	43.9	43.9	39.724	374	374;262;115;95;56	0	126.44	2.7	8	21.7	31.6	35	29.7	37.4	37.4	40.9	3660300000	5448300	12081000	14985000	400150000	524080000	342170000	789830000
Q9Y277;E5RJN6;E5RHZ6;E5RFP6;E5RHE1;E5RK27;E5RFL1	Q9Y277;E5RJN6;E5RHZ6;E5RFP6	Voltage-dependent anion-selective channel protein 3	VDAC3	sp|Q9Y277|VDAC3_HUMAN Voltage-dependent anion-selective channel protein 3 OS=Homo sapiens OX=9606 GN=VDAC3 PE=1 SV=1;tr|E5RJN6|E5RJN6_HUMAN Voltage-dependent anion-selective channel protein 3 (Fragment) OS=Homo sapiens OX=9606 GN=VDAC3 PE=1 SV=8;tr|E5RHZ6|	7	10	10	0	1	0	7	8	8	7	8	7	0	1	0	7	8	8	7	8	7	50.9	50.9	30.658	283	283;158;165;134;100;108;57	0	126.28	0	5.7	0	34.6	40.3	45.9	42	41.3	42.4	5745900000	0	19103000	0	610490000	881670000	539420000	1186000000
P05023;Q5TC01;Q5TC02;Q5TC05	P05023	Sodium/potassium-transporting ATPase subunit alpha-1	ATP1A1	sp|P05023|AT1A1_HUMAN Sodium/potassium-transporting ATPase subunit alpha-1 OS=Homo sapiens OX=9606 GN=ATP1A1 PE=1 SV=1	4	33	18	14	15	11	27	23	23	27	28	27	4	5	3	14	11	10	12	15	13	38.5	21.9	112.89	1023	1023;144;106;157	0	126.17	18.9	19.7	16.8	33.5	31.3	29.6	33.7	35.4	33.6	7200900000	46685000	67989000	26576000	1210800000	645970000	866750000	1332300000
P14866;M0QXS5;A0A3B3ITJ4;M0R1W6;B4DVF8;M0QYL7	P14866;M0QXS5;A0A3B3ITJ4	Heterogeneous nuclear ribonucleoprotein L	HNRNPL	sp|P14866|HNRPL_HUMAN Heterogeneous nuclear ribonucleoprotein L OS=Homo sapiens OX=9606 GN=HNRNPL PE=1 SV=2;tr|M0QXS5|M0QXS5_HUMAN Heterogeneous nuclear ribonucleoprotein L (Fragment) OS=Homo sapiens OX=9606 GN=HNRNPL PE=1 SV=1;tr|A0A3B3ITJ4|A0A3B3ITJ4_HUM	6	16	10	2	1	1	13	11	11	11	14	14	2	1	1	8	7	8	7	8	8	47.9	32.3	64.132	589	589;530;537;220;179;198	0	125.81	6.1	1.7	1.7	44.1	33.6	38	34.1	45.8	46.2	4958400000	14405000	8062000	11804000	782580000	626420000	490650000	870130000
Q9H3P7	Q9H3P7	Golgi resident protein GCP60	ACBD3	sp|Q9H3P7|GCP60_HUMAN Golgi resident protein GCP60 OS=Homo sapiens OX=9606 GN=ACBD3 PE=1 SV=4	1	11	11	0	1	0	8	5	5	7	8	5	0	1	0	8	5	5	7	8	5	39.8	39.8	60.593	528	528	0	125.14	0	2.5	0	30.9	17.8	18.4	25	33.3	20.6	1441700000	0	0	0	185110000	160250000	132400000	315000000
P09619;E5RJ14;E5RH16;E5RII0	P09619	Platelet-derived growth factor receptor beta	PDGFRB	sp|P09619|PGFRB_HUMAN Platelet-derived growth factor receptor beta OS=Homo sapiens OX=9606 GN=PDGFRB PE=1 SV=1	4	18	18	0	0	0	7	7	6	12	10	12	0	0	0	7	7	6	12	10	12	27.2	27.2	123.97	1106	1106;146;239;174	0	125.03	0	0	0	7.7	8.8	7.4	17.4	11.3	18.1	2577800000	0	0	0	285970000	186160000	166760000	745200000
P78371;F5GWF6;F8VQ14	P78371;F5GWF6;F8VQ14	T-complex protein 1 subunit beta	CCT2	sp|P78371|TCPB_HUMAN T-complex protein 1 subunit beta OS=Homo sapiens OX=9606 GN=CCT2 PE=1 SV=4;tr|F5GWF6|F5GWF6_HUMAN T-complex protein 1 subunit beta OS=Homo sapiens OX=9606 GN=CCT2 PE=1 SV=2;tr|F8VQ14|F8VQ14_HUMAN T-complex protein 1 subunit beta OS=Hom	3	23	23	6	4	3	15	13	11	17	17	17	6	4	3	15	13	11	17	17	17	60.2	60.2	57.488	535	535;530;416	0	124.93	19.1	12.5	8.2	42.8	35	32	43.7	43.9	46	8285400000	57387000	17554000	22619000	1286900000	1282800000	810470000	1948000000
Q14697;F5H6X6;E9PKU7;E9PNH1	Q14697;F5H6X6;E9PKU7	Neutral alpha-glucosidase AB	GANAB	sp|Q14697|GANAB_HUMAN Neutral alpha-glucosidase AB OS=Homo sapiens OX=9606 GN=GANAB PE=1 SV=3;tr|F5H6X6|F5H6X6_HUMAN Neutral alpha-glucosidase AB OS=Homo sapiens OX=9606 GN=GANAB PE=1 SV=1;tr|E9PKU7|E9PKU7_HUMAN Neutral alpha-glucosidase AB OS=Homo sapiens	4	34	34	8	5	5	24	19	23	21	22	24	8	5	5	24	19	23	21	22	24	49.2	49.2	106.87	944	944;847;852;119	0	124.5	10	6.9	8.3	33.1	26.5	35.7	30.6	30.9	40.1	12375000000	74979000	30985000	48460000	1578100000	1430900000	1329900000	2438600000
P21291;E9PS42;E9PND2;E9PP21	P21291;E9PS42;E9PND2;E9PP21	Cysteine and glycine-rich protein 1	CSRP1	sp|P21291|CSRP1_HUMAN Cysteine and glycine-rich protein 1 OS=Homo sapiens OX=9606 GN=CSRP1 PE=1 SV=3;tr|E9PS42|E9PS42_HUMAN Cysteine and glycine-rich protein 1 OS=Homo sapiens OX=9606 GN=CSRP1 PE=1 SV=1;tr|E9PND2|E9PND2_HUMAN Cysteine and glycine-rich prot	4	7	7	2	3	2	6	6	6	6	6	7	2	3	2	6	6	6	6	6	7	46.1	46.1	20.567	193	193;153;153;160	0	123.49	17.6	25.4	16.6	45.6	45.6	45.6	45.6	45.6	46.1	3713400000	14609000	20843000	22362000	375070000	467210000	490190000	825110000
E7EX90;Q14203;Q6AWB1;E7EWF7;C9JJD0;C9JKG6;E9PCY0	E7EX90;Q14203;Q6AWB1	Dynactin subunit 1	DCTN1;DKFZp686E0752	tr|E7EX90|E7EX90_HUMAN Dynactin subunit 1 OS=Homo sapiens OX=9606 GN=DCTN1 PE=1 SV=1;sp|Q14203|DCTN1_HUMAN Dynactin subunit 1 OS=Homo sapiens OX=9606 GN=DCTN1 PE=1 SV=3;tr|Q6AWB1|Q6AWB1_HUMAN Dynactin subunit 1 OS=Homo sapiens OX=9606 GN=DCTN1 PE=1 SV=1	7	25	25	2	1	0	19	17	12	15	14	13	2	1	0	19	17	12	15	14	13	30.6	30.6	139.09	1256	1256;1278;890;191;121;135;186	0	123.49	1.9	1	0	23.5	22.9	15.8	19.7	20.1	17.4	2819200000	4099600	4917300	0	524170000	414450000	260140000	734920000
P62805	P62805	Histone H4	HIST1H4A	sp|P62805|H4_HUMAN Histone H4 OS=Homo sapiens OX=9606 GN=H4C1 PE=1 SV=2	1	11	11	9	7	8	10	9	11	8	8	8	9	7	8	10	9	11	8	8	8	58.3	58.3	11.367	103	103	0	123.35	53.4	52.4	43.7	57.3	53.4	58.3	53.4	53.4	53.4	109260000000	6173500000	6400900000	11598000000	13977000000	14021000000	13475000000	13278000000
P09972;A8MVZ9;J3KSV6;J3QKP5;K7EKH5;C9J8F3;J3QKK1	P09972;A8MVZ9;J3KSV6;J3QKP5;K7EKH5;C9J8F3	Fructose-bisphosphate aldolase C;Fructose-bisphosphate aldolase	ALDOC	sp|P09972|ALDOC_HUMAN Fructose-bisphosphate aldolase C OS=Homo sapiens OX=9606 GN=ALDOC PE=1 SV=2;tr|A8MVZ9|A8MVZ9_HUMAN Fructose-bisphosphate aldolase OS=Homo sapiens OX=9606 GN=ALDOC PE=1 SV=1;tr|J3KSV6|J3KSV6_HUMAN Fructose-bisphosphate aldolase C (Frag	7	12	10	5	6	7	6	7	11	7	7	8	4	4	5	4	5	9	5	5	6	36	28.3	39.455	364	364;336;175;180;135;149;122	0	123.2	22	22.5	23.1	23.1	26.9	33	26.1	23.1	29.9	7994500000	123570000	91732000	148970000	1076700000	906790000	1765400000	1747700000
P41091;Q2VIR3;H7BZU1	P41091;Q2VIR3	Eukaryotic translation initiation factor 2 subunit 3;Putative eukaryotic translation initiation factor 2 subunit 3-like protein	EIF2S3;EIF2S3L	sp|P41091|IF2G_HUMAN Eukaryotic translation initiation factor 2 subunit 3 OS=Homo sapiens OX=9606 GN=EIF2S3 PE=1 SV=3;sp|Q2VIR3|IF2GL_HUMAN Eukaryotic translation initiation factor 2 subunit 3B OS=Homo sapiens OX=9606 GN=EIF2S3B PE=2 SV=2	3	14	14	4	4	3	12	7	9	8	14	10	4	4	3	12	7	9	8	14	10	39.8	39.8	51.109	472	472;472;183	0	121.47	13.1	13.1	12.1	37.5	22.9	28	25.8	39.8	31.4	5688900000	42847000	10553000	30584000	728730000	494090000	713720000	1271300000
I3L1P8;Q02978	I3L1P8;Q02978	Mitochondrial 2-oxoglutarate/malate carrier protein	SLC25A11	tr|I3L1P8|I3L1P8_HUMAN Mitochondrial 2-oxoglutarate/malate carrier protein (Fragment) OS=Homo sapiens OX=9606 GN=SLC25A11 PE=1 SV=1;sp|Q02978|M2OM_HUMAN Mitochondrial 2-oxoglutarate/malate carrier protein OS=Homo sapiens OX=9606 GN=SLC25A11 PE=1 SV=3	2	11	11	1	2	1	6	6	5	5	7	8	1	2	1	6	6	5	5	7	8	44.6	44.6	32.182	296	296;314	0	120.87	5.4	9.5	5.4	25.7	29.4	26.7	25.7	33.4	36.8	4011900000	4984500	10198000	4955000	518030000	558030000	366100000	659190000
P39748;I3L3E9;F5H1Y3	P39748;I3L3E9;F5H1Y3	Flap endonuclease 1	FEN1	sp|P39748|FEN1_HUMAN Flap endonuclease 1 OS=Homo sapiens OX=9606 GN=FEN1 PE=1 SV=1;tr|I3L3E9|I3L3E9_HUMAN Flap endonuclease 1 (Fragment) OS=Homo sapiens OX=9606 GN=FEN1 PE=1 SV=1;tr|F5H1Y3|F5H1Y3_HUMAN Flap endonuclease 1 (Fragment) OS=Homo sapiens OX=9606	3	4	4	0	0	1	3	3	3	3	4	2	0	0	1	3	3	3	3	4	2	15.3	15.3	42.592	380	380;154;165	0	120.84	0	0	4.2	12.4	12.4	10	12.4	15.3	7.1	664780000	0	0	1109100	128660000	79098000	27507000	179680000
Q96ER3;J3KND1;E9PRZ1;E9PMD2;H0YEK5;H0YDM3;H0YCN7;E9PL53	Q96ER3;J3KND1;E9PRZ1;E9PMD2	Protein SAAL1	SAAL1	sp|Q96ER3|SAAL1_HUMAN Protein SAAL1 OS=Homo sapiens OX=9606 GN=SAAL1 PE=1 SV=2;tr|J3KND1|J3KND1_HUMAN Protein SAAL1 OS=Homo sapiens OX=9606 GN=SAAL1 PE=1 SV=1;tr|E9PRZ1|E9PRZ1_HUMAN Protein SAAL1 OS=Homo sapiens OX=9606 GN=SAAL1 PE=1 SV=1;tr|E9PMD2|E9PMD2_	8	9	9	0	0	0	5	2	4	5	7	6	0	0	0	5	2	4	5	7	6	29.5	29.5	53.557	474	474;473;476;353;264;133;149;209	0	120.41	0	0	0	18.6	8.9	14.1	16.7	25.1	20	1279500000	0	0	0	167440000	103840000	129100000	245170000
Q9NZN4	Q9NZN4	EH domain-containing protein 2	EHD2	sp|Q9NZN4|EHD2_HUMAN EH domain-containing protein 2 OS=Homo sapiens OX=9606 GN=EHD2 PE=1 SV=2	1	21	20	4	1	1	11	15	12	15	13	16	4	1	1	10	14	11	14	12	15	56.5	54.9	61.161	543	543	0	120.36	10.9	2.2	2.2	37.8	46	37.4	47.5	40.7	44.6	6734500000	26289000	6793500	0	926970000	865880000	733860000	1431300000
P18206	P18206	Vinculin	VCL	sp|P18206|VINC_HUMAN Vinculin OS=Homo sapiens OX=9606 GN=VCL PE=1 SV=4	1	37	37	14	14	9	23	23	21	25	26	21	14	14	9	23	23	21	25	26	21	43.3	43.3	123.8	1134	1134	0	118.05	16.9	14.3	10.5	24.8	26.3	25.4	30.4	28.8	22.2	9016800000	128890000	96878000	102860000	1281700000	1015300000	910050000	2146400000
P62879;C9JXA5;C9JIS1;E7EP32;C9JZN1;F5H8J8;F5H100;F5H0S8;E9PCP0;P16520	P62879;C9JXA5;C9JIS1;E7EP32;C9JZN1	Guanine nucleotide-binding protein G(I)/G(S)/G(T) subunit beta-2	GNB2	sp|P62879|GBB2_HUMAN Guanine nucleotide-binding protein G(I)/G(S)/G(T) subunit beta-2 OS=Homo sapiens OX=9606 GN=GNB2 PE=1 SV=3;tr|C9JXA5|C9JXA5_HUMAN Guanine nucleotide-binding protein G(I)/G(S)/G(T) subunit beta-2 (Fragment) OS=Homo sapiens OX=9606 GN=GN	10	15	7	6	6	5	7	8	9	8	9	12	2	2	2	4	4	5	3	4	7	66.5	40.3	37.331	340	340;251;232;296;152;232;232;264;339;340	0	117.94	27.6	25	24.7	31.2	34.4	39.7	27.4	37.6	61.5	4421200000	54166000	34981000	84024000	481950000	377680000	648420000	641590000
Q02818;C9JKZ2;H7BZI1;C9JBD3;C9J3C1	Q02818;C9JKZ2;H7BZI1	Nucleobindin-1	NUCB1	sp|Q02818|NUCB1_HUMAN Nucleobindin-1 OS=Homo sapiens OX=9606 GN=NUCB1 PE=1 SV=4;tr|C9JKZ2|C9JKZ2_HUMAN Nucleobindin-1 (Fragment) OS=Homo sapiens OX=9606 GN=NUCB1 PE=1 SV=8;tr|H7BZI1|H7BZI1_HUMAN Nucleobindin-1 (Fragment) OS=Homo sapiens OX=9606 GN=NUCB1 PE	5	21	21	0	0	0	17	17	15	16	17	16	0	0	0	17	17	15	16	17	16	50.8	50.8	53.879	461	461;267;295;110;124	0	117.43	0	0	0	42.1	46.9	35.4	41.9	45.6	38.4	9396600000	0	0	0	1544900000	1622400000	1433800000	1638000000
P14868;C9J7S3;C9JLC1;H7BZ35;H7C278;C9JQM9	P14868	Aspartate--tRNA ligase, cytoplasmic	DARS	sp|P14868|SYDC_HUMAN Aspartate--tRNA ligase, cytoplasmic OS=Homo sapiens OX=9606 GN=DARS1 PE=1 SV=2	6	19	19	2	2	2	16	16	15	17	16	13	2	2	2	16	16	15	17	16	13	47.3	47.3	57.136	501	501;175;182;188;179;135	0	117.2	7.8	7.6	7.8	42.1	40.1	38.9	44.1	41.1	35.9	8036400000	16200000	18428000	10890000	1087300000	1112300000	993900000	1879200000
Q9P035;H3BS72;H3BPZ1;H3BRL8;H3BMZ1	Q9P035;H3BS72;H3BPZ1;H3BRL8	Very-long-chain (3R)-3-hydroxyacyl-CoA dehydratase 3	HACD3	sp|Q9P035|HACD3_HUMAN Very-long-chain (3R)-3-hydroxyacyl-CoA dehydratase 3 OS=Homo sapiens OX=9606 GN=HACD3 PE=1 SV=2;tr|H3BS72|H3BS72_HUMAN Very-long-chain (3R)-3-hydroxyacyl-CoA dehydratase OS=Homo sapiens OX=9606 GN=HACD3 PE=1 SV=1;tr|H3BPZ1|H3BPZ1_HUMA	5	12	12	0	1	2	8	6	8	9	10	10	0	1	2	8	6	8	9	10	10	33.4	33.4	43.159	362	362;400;337;245;139	0	116.54	0	3.9	9.7	25.4	20.4	25.7	25.7	25.7	31.5	6515100000	0	3183300	17121000	839530000	736960000	626030000	1232000000
Q9Y696	Q9Y696	Chloride intracellular channel protein 4	CLIC4	sp|Q9Y696|CLIC4_HUMAN Chloride intracellular channel protein 4 OS=Homo sapiens OX=9606 GN=CLIC4 PE=1 SV=4	1	13	13	3	4	3	9	8	6	8	9	7	3	4	3	9	8	6	8	9	7	66	66	28.772	253	253	0	115.31	20.6	22.1	20.6	49	45.8	41.9	46.2	46.2	48.6	6396300000	28445000	25202000	18269000	1172100000	912970000	476930000	1263100000
C9J9K3;A0A0C4DG17;P08865;F8WD59	C9J9K3;A0A0C4DG17;P08865;F8WD59	40S ribosomal protein SA	RPSA	tr|C9J9K3|C9J9K3_HUMAN 40S ribosomal protein SA (Fragment) OS=Homo sapiens OX=9606 GN=RPSA PE=1 SV=8;tr|A0A0C4DG17|A0A0C4DG17_HUMAN 40S ribosomal protein SA OS=Homo sapiens OX=9606 GN=RPSA PE=1 SV=1;sp|P08865|RSSA_HUMAN 40S ribosomal protein SA OS=Homo sap	4	10	10	3	3	4	6	6	8	9	6	9	3	3	4	6	6	8	9	6	9	54	54	29.404	263	263;300;295;116	0	114.82	17.5	17.5	21.7	30.4	30.4	50.2	43	26.2	54	9910100000	30138000	30757000	49324000	1242600000	1445100000	1243100000	2449900000
J3KR97;Q9BTW9;A0A0J9YWI5;A0A0J9YVR1;I3L0V3;I3L439;I3L163;I3L4D2;I3L3H4;I3L131;I3L143;I3L500;I3L120;A0A0J9YXU4;A0A0J9YVU1;A0A0J9YYG2;I3L1S3	J3KR97;Q9BTW9	Tubulin-specific chaperone D	TBCD	tr|J3KR97|J3KR97_HUMAN Tubulin-specific chaperone D OS=Homo sapiens OX=9606 GN=TBCD PE=1 SV=1;sp|Q9BTW9|TBCD_HUMAN Tubulin-specific chaperone D OS=Homo sapiens OX=9606 GN=TBCD PE=1 SV=2	17	24	24	0	0	0	17	15	11	16	18	14	0	0	0	17	15	11	16	18	14	28.9	28.9	136.55	1230	1230;1192;466;504;237;256;244;109;134;141;211;251;260;260;92;80;117	0	114.31	0	0	0	20.9	18.4	14	20	21	18.4	3436500000	0	0	0	585400000	366220000	371960000	790870000
Q99714;Q5H928	Q99714;Q5H928	3-hydroxyacyl-CoA dehydrogenase type-2	HSD17B10	sp|Q99714|HCD2_HUMAN 3-hydroxyacyl-CoA dehydrogenase type-2 OS=Homo sapiens OX=9606 GN=HSD17B10 PE=1 SV=3;tr|Q5H928|Q5H928_HUMAN 3-hydroxyacyl-CoA dehydrogenase type-2 OS=Homo sapiens OX=9606 GN=HSD17B10 PE=1 SV=1	2	10	10	0	0	0	9	7	6	7	7	8	0	0	0	9	7	6	7	7	8	71.3	71.3	26.923	261	261;169	0	114.21	0	0	0	65.9	53.6	48.3	53.6	53.6	59	1722100000	0	0	0	234020000	180670000	152710000	341100000
P23396;E9PL09;E9PPU1;F2Z2S8;H0YCJ7;H0YEU2;H0YF32;E9PQ96;E9PJH4;E9PK82;E9PSF4;E9PQX2;H0YES8	P23396;E9PL09;E9PPU1;F2Z2S8;H0YCJ7;H0YEU2	40S ribosomal protein S3	RPS3	sp|P23396|RS3_HUMAN 40S ribosomal protein S3 OS=Homo sapiens OX=9606 GN=RPS3 PE=1 SV=2;tr|E9PL09|E9PL09_HUMAN 40S ribosomal protein S3 OS=Homo sapiens OX=9606 GN=RPS3 PE=1 SV=1;tr|E9PPU1|E9PPU1_HUMAN 40S ribosomal protein S3 OS=Homo sapiens OX=9606 GN=RPS3	13	17	17	10	6	5	14	14	13	15	15	15	10	6	5	14	14	13	15	15	15	68.7	68.7	26.688	243	243;231;158;117;135;171;123;91;115;128;103;44;33	0	114.04	49	29.2	23.9	65	65	58.4	65	61.3	65	29240000000	339480000	212480000	84916000	4081800000	3928600000	3372400000	6257400000
E9PJK1;E9PRJ8;H0YDL9;H0YDJ9;E9PIF1;A6NMH8;P60033;E9PM31;H0YEE2	E9PJK1;E9PRJ8;H0YDL9;H0YDJ9;E9PIF1;A6NMH8;P60033	Tetraspanin;CD81 antigen	CD81	tr|E9PJK1|E9PJK1_HUMAN Tetraspanin OS=Homo sapiens OX=9606 GN=CD81 PE=1 SV=1;tr|E9PRJ8|E9PRJ8_HUMAN Tetraspanin (Fragment) OS=Homo sapiens OX=9606 GN=CD81 PE=1 SV=1;tr|H0YDL9|H0YDL9_HUMAN Tetraspanin (Fragment) OS=Homo sapiens OX=9606 GN=CD81 PE=1 SV=1;tr|	9	4	4	2	0	0	3	4	4	4	3	4	2	0	0	3	4	4	4	3	4	39.4	39.4	17.963	165	165;209;221;225;242;274;236;92;148	0	113.55	26.1	0	0	35.8	39.4	39.4	39.4	35.8	39.4	9078000000	14224000	0	0	1254000000	1023700000	929480000	2254100000
A0A2U3TZU2;P06744;K7EQ48;A0A0J9YXP8;A0A0J9YYH3;A0A2R8Y6C7;A0A0J9YX90;K7EPY4;K7ERC6;K7EP41;K7ENA0;A0A2R8YF08;K7ELR7;A0A0J9YXM3;A0A0J9YYI8;K7EIL4;A0A0J9YXH9;K7ERK8;K7ESF4	A0A2U3TZU2;P06744;K7EQ48;A0A0J9YXP8;A0A0J9YYH3;A0A2R8Y6C7;A0A0J9YX90	Glucose-6-phosphate isomerase	GPI	tr|A0A2U3TZU2|A0A2U3TZU2_HUMAN Glucose-6-phosphate isomerase OS=Homo sapiens OX=9606 GN=GPI PE=1 SV=1;sp|P06744|G6PI_HUMAN Glucose-6-phosphate isomerase OS=Homo sapiens OX=9606 GN=GPI PE=1 SV=4;tr|K7EQ48|K7EQ48_HUMAN Glucose-6-phosphate isomerase (Fragment	19	16	16	4	1	3	13	11	9	11	12	9	4	1	3	13	11	9	11	12	9	37.4	37.4	67.285	597	597;558;447;268;283;316;279;166;170;159;162;145;146;161;110;116;133;139;209	0	113.53	9.5	2.5	7.7	33	31.2	24.3	32.8	34.2	24.3	8103900000	90155000	30852000	67729000	1354600000	1179700000	840500000	1840200000
Q7L2H7;J3KNJ2;H0YCQ8;E9PRY0;E9PN86;E9PRI2;E7ESM3	Q7L2H7;J3KNJ2;H0YCQ8	Eukaryotic translation initiation factor 3 subunit M	EIF3M	sp|Q7L2H7|EIF3M_HUMAN Eukaryotic translation initiation factor 3 subunit M OS=Homo sapiens OX=9606 GN=EIF3M PE=1 SV=1;tr|J3KNJ2|J3KNJ2_HUMAN Eukaryotic translation initiation factor 3 subunit M (Fragment) OS=Homo sapiens OX=9606 GN=EIF3M PE=1 SV=1;tr|H0YCQ	7	12	12	1	0	1	8	7	7	8	8	9	1	0	1	8	7	7	8	8	9	44.4	44.4	42.502	374	374;191;220;74;102;59;123	0	113.41	4.8	0	4.8	32.6	31.6	35.3	24.9	32.4	38.2	2400000000	9445700	0	10635000	305640000	333310000	167880000	514970000
P60228;E5RGA2;H0YBR5;E5RHS5;H0YAW4;E5RIT4;E5RII3;E5RIP5;E5RJ25;H0YBP5	P60228;E5RGA2	Eukaryotic translation initiation factor 3 subunit E	EIF3E	sp|P60228|EIF3E_HUMAN Eukaryotic translation initiation factor 3 subunit E OS=Homo sapiens OX=9606 GN=EIF3E PE=1 SV=1;tr|E5RGA2|E5RGA2_HUMAN Eukaryotic translation initiation factor 3 subunit E OS=Homo sapiens OX=9606 GN=EIF3E PE=1 SV=1	10	18	18	1	1	0	11	11	10	11	12	14	1	1	0	11	11	10	11	12	14	47.9	47.9	52.22	445	445;352;171;226;156;75;75;45;56;74	0	113.25	2.7	2.2	0	30.6	32.8	28.5	32.1	32.1	37.1	8747500000	0	5943200	0	1050600000	1097900000	860000000	2017800000
O75533;H7C341;B4DGZ4;A0A494C1M2	O75533	Splicing factor 3B subunit 1	SF3B1	sp|O75533|SF3B1_HUMAN Splicing factor 3B subunit 1 OS=Homo sapiens OX=9606 GN=SF3B1 PE=1 SV=3	4	29	29	2	1	1	21	15	11	16	20	13	2	1	1	21	15	11	16	20	13	31.9	31.9	145.83	1304	1304;241;154;161	0	113.17	2.2	0.8	0.8	23	15	10.5	20.4	21.9	14.3	3534200000	5482000	0	1850300	693920000	560380000	230470000	654010000
P60174;U3KPZ0;U3KQF3;U3KPS5	P60174	Triosephosphate isomerase	TPI1	sp|P60174|TPIS_HUMAN Triosephosphate isomerase OS=Homo sapiens OX=9606 GN=TPI1 PE=1 SV=3	4	17	17	11	12	12	14	16	12	14	12	14	11	12	12	14	16	12	14	12	14	75.9	75.9	30.791	286	286;113;98;38	0	113.11	58.4	56.6	59.8	68.9	73.4	59.8	67.8	58	66.8	40999000000	1070300000	789870000	1184900000	5226400000	6528500000	4480700000	7789400000
Q96D15;M0QZH0;M0QYB8	Q96D15;M0QZH0	Reticulocalbin-3	RCN3	sp|Q96D15|RCN3_HUMAN Reticulocalbin-3 OS=Homo sapiens OX=9606 GN=RCN3 PE=1 SV=1;tr|M0QZH0|M0QZH0_HUMAN Reticulocalbin-3 (Fragment) OS=Homo sapiens OX=9606 GN=RCN3 PE=1 SV=1	3	7	7	0	0	0	6	5	7	3	5	6	0	0	0	6	5	7	3	5	6	24.1	24.1	37.493	328	328;169;150	0	113.08	0	0	0	19.2	14	24.1	9.5	18.6	23.5	1398200000	0	0	0	351620000	225620000	281060000	131390000
A0A5F9ZHM4;P07195;A0A3B3IS95;A8MW50;C9J7H8;F5H793;F5H5G7;F5H155;A0A087WUM2;G3XAP5;F5H245;Q6ZMR3;P07864;Q9BYZ2	A0A5F9ZHM4;P07195;A0A3B3IS95;A8MW50;C9J7H8	L-lactate dehydrogenase B chain;L-lactate dehydrogenase	LDHB	tr|A0A5F9ZHM4|A0A5F9ZHM4_HUMAN L-lactate dehydrogenase OS=Homo sapiens OX=9606 GN=LDHB PE=1 SV=1;sp|P07195|LDHB_HUMAN L-lactate dehydrogenase B chain OS=Homo sapiens OX=9606 GN=LDHB PE=1 SV=2;tr|A0A3B3IS95|A0A3B3IS95_HUMAN L-lactate dehydrogenase OS=Homo s	14	17	15	9	8	10	12	11	11	12	13	9	8	7	9	11	10	10	10	12	8	47.8	42.5	37.294	341	341;334;281;232;136;102;183;225;233;241;318;332;332;381	0	112.67	34	28.4	37	42.5	39.6	39.9	37.8	40.5	32.8	22483000000	430760000	347570000	350260000	4261900000	2729100000	2274800000	4031100000
Q9Y5M8;H7C4H2;C9J5Z8	Q9Y5M8;H7C4H2	Signal recognition particle receptor subunit beta	SRPRB	sp|Q9Y5M8|SRPRB_HUMAN Signal recognition particle receptor subunit beta OS=Homo sapiens OX=9606 GN=SRPRB PE=1 SV=3;tr|H7C4H2|H7C4H2_HUMAN Signal recognition particle receptor subunit beta (Fragment) OS=Homo sapiens OX=9606 GN=SRPRB PE=1 SV=1	3	15	15	0	3	0	13	11	10	8	11	10	0	3	0	13	11	10	8	11	10	60.1	60.1	29.702	271	271;160;92	0	111.78	0	14.8	0	53.1	45.8	45.8	37.3	45	43.5	8491800000	0	3087000	0	986640000	1054400000	917620000	1572600000
P53396;K7ESG8;K7EIE7	P53396	ATP-citrate synthase	ACLY	sp|P53396|ACLY_HUMAN ATP-citrate synthase OS=Homo sapiens OX=9606 GN=ACLY PE=1 SV=3	3	35	35	8	13	6	26	22	23	20	20	24	8	13	6	26	22	23	20	20	24	44.4	44.4	120.84	1101	1101;109;133	0	111.2	9.2	14.3	7.6	32.8	28	30.5	26.4	26.8	32.6	15196000000	591570000	127420000	1163800000	2219500000	2998700000	1708300000	2467500000
Q14257;A8MXP8;H0YL43	Q14257;A8MXP8	Reticulocalbin-2	RCN2	sp|Q14257|RCN2_HUMAN Reticulocalbin-2 OS=Homo sapiens OX=9606 GN=RCN2 PE=1 SV=1;tr|A8MXP8|A8MXP8_HUMAN Reticulocalbin-2 OS=Homo sapiens OX=9606 GN=RCN2 PE=1 SV=1	3	9	9	0	0	0	7	5	6	4	6	6	0	0	0	7	5	6	4	6	6	29.7	29.7	36.876	317	317;216;155	0	111.13	0	0	0	28.7	23.3	27.1	16.1	24	27.1	3044600000	0	0	0	443570000	497430000	471000000	458980000
P27824;H0Y9Q7;D6RDP7;D6RGY2;D6RFL1;D6RAU8;D6RB85;H0Y9H1;D6RAQ8;D6RHJ3;D6RD16	P27824;H0Y9Q7	Calnexin	CANX	sp|P27824|CALX_HUMAN Calnexin OS=Homo sapiens OX=9606 GN=CANX PE=1 SV=2;tr|H0Y9Q7|H0Y9Q7_HUMAN Calnexin (Fragment) OS=Homo sapiens OX=9606 GN=CANX PE=1 SV=1	11	19	19	1	1	2	12	10	10	8	12	13	1	1	2	12	10	10	8	12	13	33.4	33.4	67.567	592	592;170;168;308;131;134;144;189;107;78;96	0	110.75	2.7	1.5	4.7	19.9	18.1	19.8	14.9	19.9	25.2	8373900000	17386000	13273000	0	1103300000	960480000	958470000	1638500000
Q96T76;H0Y746;Q5T454;H7C1W5;B0QZ77;H0Y7V3;F8WCH8	Q96T76;H0Y746	MMS19 nucleotide excision repair protein homolog	MMS19	sp|Q96T76|MMS19_HUMAN MMS19 nucleotide excision repair protein homolog OS=Homo sapiens OX=9606 GN=MMS19 PE=1 SV=2;tr|H0Y746|H0Y746_HUMAN MMS19 nucleotide excision repair protein homolog (Fragment) OS=Homo sapiens OX=9606 GN=MMS19 PE=1 SV=1	7	18	18	0	0	0	14	13	13	12	13	16	0	0	0	14	13	13	12	13	16	27.1	27.1	113.29	1030	1030;598;302;149;277;90;173	0	110.12	0	0	0	21.1	19.5	19.3	17.8	19.3	24.1	4943500000	0	0	0	666040000	705390000	548440000	987570000
Q9Y673	Q9Y673	Dolichyl-phosphate beta-glucosyltransferase	ALG5	sp|Q9Y673|ALG5_HUMAN Dolichyl-phosphate beta-glucosyltransferase OS=Homo sapiens OX=9606 GN=ALG5 PE=1 SV=1	1	9	9	0	0	0	9	8	7	8	7	7	0	0	0	9	8	7	8	7	7	39.2	39.2	36.946	324	324	0	109.13	0	0	0	39.2	34.9	31.2	34.9	31.2	31.5	2345200000	0	0	0	334800000	318190000	202980000	431270000
Q86VP6;A0A0C4DGH5;H0YH27;F5H6I6;A0A3B3ISC4;F8WBB8	Q86VP6;A0A0C4DGH5	Cullin-associated NEDD8-dissociated protein 1	CAND1	sp|Q86VP6|CAND1_HUMAN Cullin-associated NEDD8-dissociated protein 1 OS=Homo sapiens OX=9606 GN=CAND1 PE=1 SV=2;tr|A0A0C4DGH5|A0A0C4DGH5_HUMAN Cullin-associated NEDD8-dissociated protein 1 (Fragment) OS=Homo sapiens OX=9606 GN=CAND1 PE=1 SV=1	6	31	29	6	4	1	25	18	13	19	20	20	6	4	1	24	18	13	18	19	20	32.9	31.5	136.37	1230	1230;770;442;54;89;110	0	109.11	6.7	4.4	1.1	27.5	19.4	14.1	19.9	21.7	22.8	7663600000	41915000	10763000	0	1286000000	944290000	651650000	1775400000
Q8NBS9	Q8NBS9	Thioredoxin domain-containing protein 5	TXNDC5	sp|Q8NBS9|TXND5_HUMAN Thioredoxin domain-containing protein 5 OS=Homo sapiens OX=9606 GN=TXNDC5 PE=1 SV=2	1	9	9	1	3	2	6	5	6	5	6	6	1	3	2	6	5	6	5	6	6	26.4	26.4	47.628	432	432	0	109.05	3.7	9.7	7.4	18.8	16.7	21.3	17.6	18.8	18.3	1684000000	6043200	11859000	7200600	272160000	154800000	209330000	348370000
Q9Y3F4;H0YH33	Q9Y3F4	Serine-threonine kinase receptor-associated protein	STRAP	sp|Q9Y3F4|STRAP_HUMAN Serine-threonine kinase receptor-associated protein OS=Homo sapiens OX=9606 GN=STRAP PE=1 SV=1	2	15	15	4	5	5	14	13	12	14	15	11	4	5	5	14	13	12	14	15	11	61.4	61.4	38.438	350	350;95	0	108.96	17.7	21.4	21.4	58.3	55.1	49.4	57.1	61.4	47.4	4724500000	32147000	28127000	57745000	693850000	686720000	467440000	1061100000
C9JVY5;Q9Y2D5	C9JVY5;Q9Y2D5	A-kinase anchor protein 2	AKAP2	tr|C9JVY5|C9JVY5_HUMAN PALM2 and AKAP2 fusion (Fragment) OS=Homo sapiens OX=9606 GN=PALM2AKAP2 PE=1 SV=1;sp|Q9Y2D5|AKAP2_HUMAN A-kinase anchor protein 2 OS=Homo sapiens OX=9606 GN=AKAP2 PE=1 SV=3	2	5	5	0	0	0	2	2	0	4	4	2	0	0	0	2	2	0	4	4	2	11.7	11.7	85.282	778	778;859	0	108.46	0	0	0	5.5	5.5	0	10.2	9.1	4.9	180440000	0	0	0	18732000	5142100	0	41044000
Q02750;H3BRW9	Q02750	Dual specificity mitogen-activated protein kinase kinase 1	MAP2K1	sp|Q02750|MP2K1_HUMAN Dual specificity mitogen-activated protein kinase kinase 1 OS=Homo sapiens OX=9606 GN=MAP2K1 PE=1 SV=2	2	15	8	0	1	0	6	2	3	8	10	12	0	0	0	5	2	2	5	5	6	51.7	35.4	43.439	393	393;217	0	108.22	0	3.1	0	22.1	6.6	10.2	27.5	30.5	48.3	1706700000	0	0	0	83087000	15517000	159830000	508840000
Q13263;M0R0K9;M0R3C0	Q13263;M0R0K9	Transcription intermediary factor 1-beta	TRIM28	sp|Q13263|TIF1B_HUMAN Transcription intermediary factor 1-beta OS=Homo sapiens OX=9606 GN=TRIM28 PE=1 SV=5;tr|M0R0K9|M0R0K9_HUMAN Transcription intermediary factor 1-beta (Fragment) OS=Homo sapiens OX=9606 GN=TRIM28 PE=1 SV=1	3	14	14	4	1	2	9	8	7	10	8	7	4	1	2	9	8	7	10	8	7	32.9	32.9	88.549	835	835;460;178	0	108.18	8.1	2.4	5.4	20.1	16.4	15.4	24.1	15.6	12.8	2467600000	21209000	0	9818200	398990000	300610000	264690000	581630000
B1AK87;B1AK88	B1AK87;B1AK88		CAPZB	tr|B1AK87|B1AK87_HUMAN F-actin-capping protein subunit beta OS=Homo sapiens OX=9606 GN=CAPZB PE=1 SV=1;tr|B1AK88|B1AK88_HUMAN F-actin-capping protein subunit beta OS=Homo sapiens OX=9606 GN=CAPZB PE=1 SV=1	2	11	2	4	7	2	6	7	8	8	9	9	0	0	0	0	1	1	2	1	1	48.1	6.2	29.295	260	260;301	0	107.66	16.5	36.5	13.1	29.6	35.4	40.4	35.8	44.2	44.2	6824300000	45249000	41649000	11956000	910610000	908620000	778310000	1449900000
O15269;A0A2R8Y4S0;A0A2R8Y6A2	O15269	Serine palmitoyltransferase 1	SPTLC1	sp|O15269|SPTC1_HUMAN Serine palmitoyltransferase 1 OS=Homo sapiens OX=9606 GN=SPTLC1 PE=1 SV=1	3	9	9	1	0	2	6	6	5	5	7	6	1	0	2	6	6	5	5	7	6	28.1	28.1	52.743	473	473;143;144	0	107.07	3	0	5.9	20.1	20.7	18.2	18.2	22	19.9	3975000000	3047000	0	4653300	589370000	677740000	407630000	631870000
A0A3B3IRI2;P17812;B4E1E0;A0A3B3IRQ8;A0A3B3ITF6;A0A3B3ITB8;A0A3B3ISY3;A0A3B3ITH9	A0A3B3IRI2;P17812;B4E1E0;A0A3B3IRQ8;A0A3B3ITF6;A0A3B3ITB8	CTP synthase 1;CTP synthase	CTPS1	tr|A0A3B3IRI2|A0A3B3IRI2_HUMAN CTP synthase OS=Homo sapiens OX=9606 GN=CTPS1 PE=1 SV=1;sp|P17812|PYRG1_HUMAN CTP synthase 1 OS=Homo sapiens OX=9606 GN=CTPS1 PE=1 SV=2;tr|B4E1E0|B4E1E0_HUMAN CTP synthase OS=Homo sapiens OX=9606 GN=CTPS1 PE=1 SV=1;tr|A0A3B3I	8	18	18	0	1	0	12	8	7	11	10	13	0	1	0	12	8	7	11	10	13	47.5	47.5	63.723	564	564;591;435;451;461;335;89;111	0	106.95	0	3.2	0	34.8	19	18.3	22.2	21.8	32.6	3018800000	0	0	0	443720000	313390000	276270000	787210000
Q02413	Q02413	Desmoglein-1	DSG1	sp|Q02413|DSG1_HUMAN Desmoglein-1 OS=Homo sapiens OX=9606 GN=DSG1 PE=1 SV=2	1	27	27	22	15	22	13	12	13	10	13	16	22	15	22	13	12	13	10	13	16	39.3	39.3	113.75	1049	1049	0	106.79	35.6	23.2	33	23.9	21.1	24	19.4	24.6	27.4	5547100000	975340000	283970000	958310000	417110000	567370000	423630000	348780000
P83436;I3L2R8;I3L337	P83436	Conserved oligomeric Golgi complex subunit 7	COG7	sp|P83436|COG7_HUMAN Conserved oligomeric Golgi complex subunit 7 OS=Homo sapiens OX=9606 GN=COG7 PE=1 SV=1	3	22	22	0	0	0	15	14	12	15	16	17	0	0	0	15	14	12	15	16	17	44.8	44.8	86.343	770	770;88;113	0	106.46	0	0	0	27.1	25.6	23.2	29.7	30.9	35.5	4475500000	0	0	0	603590000	558400000	461060000	763410000
B4DKB2;A0A3B3ISF9;P42892;E9PJG1;E9PN99;E9PHZ1	B4DKB2;A0A3B3ISF9;P42892	Endothelin-converting enzyme 1	ECE1	tr|B4DKB2|B4DKB2_HUMAN Endothelin-converting enzyme 1 OS=Homo sapiens OX=9606 GN=ECE1 PE=1 SV=1;tr|A0A3B3ISF9|A0A3B3ISF9_HUMAN Endothelin-converting enzyme 1 OS=Homo sapiens OX=9606 GN=ECE1 PE=1 SV=1;sp|P42892|ECE1_HUMAN Endothelin-converting enzyme 1 OS=H	6	13	13	0	0	0	9	9	3	10	8	9	0	0	0	9	9	3	10	8	9	29.4	29.4	83.573	738	738;842;770;77;103;134	0	106.04	0	0	0	18.7	21.1	5.8	22.4	15.9	18.7	1584000000	0	0	0	253630000	239410000	101680000	265590000
O00299	O00299	Chloride intracellular channel protein 1	CLIC1	sp|O00299|CLIC1_HUMAN Chloride intracellular channel protein 1 OS=Homo sapiens OX=9606 GN=CLIC1 PE=1 SV=4	1	16	16	9	9	7	13	12	10	11	11	11	9	9	7	13	12	10	11	11	11	74.3	74.3	26.922	241	241	0	105.61	48.5	56.8	46.5	67.6	58.1	57.7	58.1	58.1	56.4	23599000000	294830000	237060000	340000000	3708900000	3459300000	2164200000	5038800000
Q86Y56;H0Y650;E9PGY2;H7C3B1	Q86Y56;H0Y650;E9PGY2	Dynein assembly factor 5, axonemal	DNAAF5	sp|Q86Y56|DAAF5_HUMAN Dynein assembly factor 5, axonemal OS=Homo sapiens OX=9606 GN=DNAAF5 PE=1 SV=4;tr|H0Y650|H0Y650_HUMAN Dynein assembly factor 5, axonemal (Fragment) OS=Homo sapiens OX=9606 GN=DNAAF5 PE=1 SV=1;tr|E9PGY2|E9PGY2_HUMAN Dynein assembly fac	4	22	22	0	0	0	15	11	11	15	16	19	0	0	0	15	11	11	15	16	19	39.6	39.6	93.52	855	855;657;280;195	0	105.48	0	0	0	27	19.6	19.5	27.3	28.1	34	6067800000	0	0	0	884700000	691730000	306610000	1175300000
P40926;G3XAL0	P40926;G3XAL0	Malate dehydrogenase, mitochondrial;Malate dehydrogenase	MDH2	sp|P40926|MDHM_HUMAN Malate dehydrogenase, mitochondrial OS=Homo sapiens OX=9606 GN=MDH2 PE=1 SV=3;tr|G3XAL0|G3XAL0_HUMAN Malate dehydrogenase OS=Homo sapiens OX=9606 GN=MDH2 PE=1 SV=1	2	15	15	9	9	7	12	13	12	14	14	10	9	9	7	12	13	12	14	14	10	59.2	59.2	35.503	338	338;231	0	104.96	36.7	32.5	30.2	49.7	53.3	50.3	56.2	56.2	43.2	18737000000	210660000	318940000	242350000	2303500000	2254300000	2534800000	3843900000
P52565;J3KRE2;J3KTF8;J3QQX2;J3KS60;J3KRY1	P52565;J3KRE2;J3KTF8;J3QQX2	Rho GDP-dissociation inhibitor 1	ARHGDIA	sp|P52565|GDIR1_HUMAN Rho GDP-dissociation inhibitor 1 OS=Homo sapiens OX=9606 GN=ARHGDIA PE=1 SV=3;tr|J3KRE2|J3KRE2_HUMAN Rho GDP-dissociation inhibitor 1 OS=Homo sapiens OX=9606 GN=ARHGDIA PE=1 SV=1;tr|J3KTF8|J3KTF8_HUMAN Rho GDP-dissociation inhibitor 1	6	7	7	6	4	5	6	6	7	6	6	6	6	4	5	6	6	7	6	6	6	47.5	47.5	23.207	204	204;129;193;235;92;249	0	104.92	38.2	37.7	38.2	38.2	38.2	47.5	38.2	38.2	46.1	10967000000	140370000	83173000	150350000	1226700000	1762700000	1242200000	2052500000
P61160;F5H6T1;A0A1B0GWD0;A0A1B0GWH0	P61160;F5H6T1	Actin-related protein 2	ACTR2	sp|P61160|ARP2_HUMAN Actin-related protein 2 OS=Homo sapiens OX=9606 GN=ACTR2 PE=1 SV=1;tr|F5H6T1|F5H6T1_HUMAN Actin-related protein 2 OS=Homo sapiens OX=9606 GN=ACTR2 PE=1 SV=2	4	11	11	4	3	3	7	8	7	10	9	8	4	3	3	7	8	7	10	9	8	34.5	34.5	44.76	394	394;339;53;65	0	104.59	12.9	9.4	11.2	24.6	28.4	24.6	31.2	30.7	28.9	6518800000	48054000	22840000	50767000	1018500000	998740000	624890000	1281400000
A0A0U1RRM4;P26599;A6NLN1;K7EKJ7;K7ES59;A0A0D9SF20;A0A087WU68;K7EK45;K7ELW5;X6R242;O95758	A0A0U1RRM4;P26599;A6NLN1;K7EKJ7	Polypyrimidine tract-binding protein 1	PTBP1	tr|A0A0U1RRM4|A0A0U1RRM4_HUMAN Polypyrimidine tract-binding protein 1 OS=Homo sapiens OX=9606 GN=PTBP1 PE=1 SV=1;sp|P26599|PTBP1_HUMAN Polypyrimidine tract-binding protein 1 OS=Homo sapiens OX=9606 GN=PTBP1 PE=1 SV=1;tr|A6NLN1|A6NLN1_HUMAN Polypyrimidine t	11	12	12	4	3	3	8	8	7	9	9	8	4	3	3	8	8	7	9	9	8	37.4	37.4	62.463	588	588;531;527;237;149;197;227;256;105;182;552	0	104.54	12.1	8.7	8.7	21.6	23	19.2	28.1	28.7	24.3	4785500000	49319000	27942000	51844000	752190000	592700000	554790000	925140000
Q9UQ80;F8VR77;F8W0A3;H0YIN7;F8VZ69	Q9UQ80;F8VR77	Proliferation-associated protein 2G4	PA2G4	sp|Q9UQ80|PA2G4_HUMAN Proliferation-associated protein 2G4 OS=Homo sapiens OX=9606 GN=PA2G4 PE=1 SV=3;tr|F8VR77|F8VR77_HUMAN Proliferation-associated protein 2G4 OS=Homo sapiens OX=9606 GN=PA2G4 PE=1 SV=1	5	18	18	5	5	4	11	11	7	9	14	11	5	5	4	11	11	7	9	14	11	57.9	57.9	43.786	394	394;284;187;163;64	0	102.69	15.7	16.5	12.9	37.6	35	22.6	30.2	48.2	37.3	5684500000	40984000	40558000	44787000	908770000	622660000	475650000	1095500000
P26373;J3QSB4;H3BTH3;H3BUK8;J3KS98	P26373;J3QSB4	60S ribosomal protein L13	RPL13	sp|P26373|RL13_HUMAN 60S ribosomal protein L13 OS=Homo sapiens OX=9606 GN=RPL13 PE=1 SV=4;tr|J3QSB4|J3QSB4_HUMAN 60S ribosomal protein L13 (Fragment) OS=Homo sapiens OX=9606 GN=RPL13 PE=1 SV=1	5	17	17	11	6	9	9	8	8	10	12	12	11	6	9	9	8	8	10	12	12	54.5	54.5	24.261	211	211;126;63;54;78	0	102.5	44.5	26.1	40.3	34.1	29.9	29.9	34.6	41.7	45.5	52890000000	3370600000	3940400000	3485600000	6507600000	7021500000	4288400000	7056000000
E9PDF6;O43795;H7C2Y7;E7EQD9;C9JYW1;A0A0U1RRI3;C9JUP5;Q9UBC5;C9K0I9;G3V342	E9PDF6;O43795	Unconventional myosin-Ib	MYO1B	tr|E9PDF6|E9PDF6_HUMAN Unconventional myosin-Ib OS=Homo sapiens OX=9606 GN=MYO1B PE=1 SV=1;sp|O43795|MYO1B_HUMAN Unconventional myosin-Ib OS=Homo sapiens OX=9606 GN=MYO1B PE=1 SV=3	10	24	24	1	2	1	14	16	14	13	12	14	1	2	1	14	16	14	13	12	14	28.4	28.4	128.48	1107	1107;1136;192;303;163;189;149;1043;83;688	0	101.79	1.3	2.6	1.3	17.7	19.5	18.9	16.1	16.3	18.5	4972900000	1656700	0	1330600	724490000	829470000	555570000	1064300000
P13010;C9JZ81;H7C0H9	P13010	X-ray repair cross-complementing protein 5	XRCC5	sp|P13010|XRCC5_HUMAN X-ray repair cross-complementing protein 5 OS=Homo sapiens OX=9606 GN=XRCC5 PE=1 SV=3	3	19	19	0	1	2	14	6	8	10	9	14	0	1	2	14	6	8	10	9	14	42.2	42.2	82.704	732	732;131;19	0	101.61	0	1.4	5.7	28.3	11.6	21.9	22.7	19.1	34.2	3720200000	0	7050500	2888900	733500000	238900000	219860000	804900000
P26641	P26641	Elongation factor 1-gamma	EEF1G	sp|P26641|EF1G_HUMAN Elongation factor 1-gamma OS=Homo sapiens OX=9606 GN=EEF1G PE=1 SV=3	1	17	17	8	4	6	16	15	13	14	14	14	8	4	6	16	15	13	14	14	14	43.9	43.9	50.118	437	437	0	101.51	21.7	14.4	14.9	39.1	37.5	35.2	36.8	37.1	37.1	25274000000	293730000	78285000	173260000	4218500000	3696400000	2993300000	5346000000
Q13838;Q5STU3;A0A0G2JJZ9;F6WLT2;A0A140T9X3;A0A0A0MT12;F6TRA5;F6S4E6;A0A140T9X9;A0A140T996;F6UJC5;A0A140TA18;A0A140T973;A0A140T9K1;A0A140T9L4;H0Y400;F6R6M7;F6QYI9;A0A0G2JJL7;A0A0G2JHN7;F6U6E2;F6S2B7;H0YCC6;A0A140T9K2;A0A140T9N3	Q13838;Q5STU3;A0A0G2JJZ9;F6WLT2;A0A140T9X3;A0A0A0MT12;F6TRA5;F6S4E6	Spliceosome RNA helicase DDX39B	DDX39B	sp|Q13838|DX39B_HUMAN Spliceosome RNA helicase DDX39B OS=Homo sapiens OX=9606 GN=DDX39B PE=1 SV=1;tr|Q5STU3|Q5STU3_HUMAN Spliceosome RNA helicase DDX39B OS=Homo sapiens OX=9606 GN=DDX39B PE=1 SV=2;tr|A0A0G2JJZ9|A0A0G2JJZ9_HUMAN Spliceosome RNA helicase DDX	25	20	10	5	4	2	14	13	16	13	14	14	1	2	1	6	5	6	5	6	6	60.3	35.5	48.991	428	428;425;328;289;325;235;238;231;179;189;245;247;135;138;131;187;197;187;187;95;125;132;141;64;97	0	101.21	12.6	15.9	6.1	48.6	44.2	53	44.2	45.6	50	5937300000	26132000	54071000	25350000	834870000	822600000	741180000	1124000000
Q9UBB6;H7C2R2	Q9UBB6	Neurochondrin	NCDN	sp|Q9UBB6|NCDN_HUMAN Neurochondrin OS=Homo sapiens OX=9606 GN=NCDN PE=1 SV=1	2	16	9	0	1	0	11	11	9	9	12	11	0	1	0	7	6	4	5	6	6	33.7	19.6	78.863	729	729;193	0	100.97	0	1.6	0	23.6	23	20.2	19.9	26.5	25.5	4518700000	0	3335200	0	647150000	630040000	519140000	704990000
Q5T4S7;X6R960;A0A0A0MSW0;X6RE05	Q5T4S7	E3 ubiquitin-protein ligase UBR4	UBR4	sp|Q5T4S7|UBR4_HUMAN E3 ubiquitin-protein ligase UBR4 OS=Homo sapiens OX=9606 GN=UBR4 PE=1 SV=1	4	26	26	0	0	0	11	10	5	16	12	8	0	0	0	11	10	5	16	12	8	7.7	7.7	573.83	5183	5183;890;2058;984	0	100.91	0	0	0	3.6	3.6	2	5.2	3.9	3	1120700000	0	0	0	194650000	159730000	78056000	279780000
A0A499FI48;P13667	A0A499FI48;P13667	Protein disulfide-isomerase A4	PDIA4	tr|A0A499FI48|A0A499FI48_HUMAN Protein disulfide-isomerase OS=Homo sapiens OX=9606 GN=PDIA4 PE=1 SV=1;sp|P13667|PDIA4_HUMAN Protein disulfide-isomerase A4 OS=Homo sapiens OX=9606 GN=PDIA4 PE=1 SV=2	2	19	19	4	5	5	13	11	8	12	12	6	4	5	5	13	11	8	12	12	6	39.2	39.2	73.06	646	646;645	0	100.81	9.3	11.3	9.6	29.6	22.9	18.6	25.4	27.1	14.7	3023400000	22425000	27375000	12234000	472620000	507200000	260820000	749000000
X1WI28;P27635;B8A6G2;A6QRI9	X1WI28;P27635	60S ribosomal protein L10	RPL10	tr|X1WI28|X1WI28_HUMAN 60S ribosomal protein L10 (Fragment) OS=Homo sapiens OX=9606 GN=RPL10 PE=1 SV=7;sp|P27635|RL10_HUMAN 60S ribosomal protein L10 OS=Homo sapiens OX=9606 GN=RPL10 PE=1 SV=4	4	12	2	7	7	6	9	7	6	5	7	8	1	1	2	2	2	2	2	2	2	48	14.5	22.975	200	200;214;108;181	0	100.65	36.5	36	33	48	39.5	33	27	39.5	41.5	17551000000	478320000	463530000	612380000	2534400000	1939600000	1727300000	2784400000
A0A0D9SFB3;A0A2R8YF78;A0A0D9SG12;A0A2R8YFS5;A0A2R8Y4A4;A0A0D9SF53;O00571;F6S8Q4;A0A2R8YCW1;A0A2R8YFR4;A0A2U3TZJ9;A0A2R8Y645;A0A2R8YDH3;A0A2R8Y5G6;A0A2R8YDT5;A0A2R8Y7T2;A0A0J9YVQ7;A0A2R8YCU0;A0A087WVZ1;A0A2R8Y650;A0A087WX09;C9J081;D6RCM4;Q9NQI0;A0A2R8Y770;A0A2R8YF89;C9J8G5;H0Y960	A0A0D9SFB3;A0A2R8YF78;A0A0D9SG12;A0A2R8YFS5;A0A2R8Y4A4;A0A0D9SF53;O00571;F6S8Q4;A0A2R8YCW1;A0A2R8YFR4;A0A2U3TZJ9;A0A2R8Y645;A0A2R8YDH3;A0A2R8Y5G6;A0A2R8YDT5;A0A2R8Y7T2	ATP-dependent RNA helicase DDX3X	DDX3X	tr|A0A0D9SFB3|A0A0D9SFB3_HUMAN ATP-dependent RNA helicase DDX3X OS=Homo sapiens OX=9606 GN=DDX3X PE=1 SV=1;tr|A0A2R8YF78|A0A2R8YF78_HUMAN ATP-dependent RNA helicase DDX3X OS=Homo sapiens OX=9606 GN=DDX3X PE=1 SV=1;tr|A0A0D9SG12|A0A0D9SG12_HUMAN ATP-depende	28	16	5	3	4	4	10	7	7	7	7	7	0	0	0	2	1	1	0	0	1	32.3	12.7	70.839	640	640;641;647;661;662;733;662;629;647;660;661;716;503;622;475;476;222;181;189;193;98;250;518;724;61;96;224;305	0	100.44	5.9	8.8	8.9	19.4	17.3	12.8	13.1	13.6	12.7	2086300000	9465700	9548900	16542000	294430000	409980000	240740000	414100000
P40227;Q92526	P40227	T-complex protein 1 subunit zeta	CCT6A	sp|P40227|TCPZ_HUMAN T-complex protein 1 subunit zeta OS=Homo sapiens OX=9606 GN=CCT6A PE=1 SV=3	2	20	20	6	4	3	14	13	14	15	16	15	6	4	3	14	13	14	15	16	15	59.5	59.5	58.024	531	531;530	0	100.36	16	10.7	10	37.7	30.9	43.1	42.4	44.4	45.4	17022000000	43750000	49013000	20398000	2462200000	2039000000	1605600000	4596400000
Q16698;E5RJG7;E5RFV2;E5RJD2;E5RID6;H0YAW3	Q16698	2,4-dienoyl-CoA reductase, mitochondrial	DECR1	sp|Q16698|DECR_HUMAN 2,4-dienoyl-CoA reductase, mitochondrial OS=Homo sapiens OX=9606 GN=DECR1 PE=1 SV=1	6	11	11	0	0	0	8	9	8	7	11	8	0	0	0	8	9	8	7	11	8	40.9	40.9	36.067	335	335;181;205;151;95;43	0	99.912	0	0	0	33.1	38.8	38.5	29.3	40.9	34.9	10739000000	0	0	0	2105000000	1890700000	1370000000	1802100000
Q99613;B5ME19;H3BPE3;H3BTY8;H3BPE4	Q99613;B5ME19	Eukaryotic translation initiation factor 3 subunit C;Eukaryotic translation initiation factor 3 subunit C-like protein	EIF3C;EIF3CL	sp|Q99613|EIF3C_HUMAN Eukaryotic translation initiation factor 3 subunit C OS=Homo sapiens OX=9606 GN=EIF3C PE=1 SV=1;sp|B5ME19|EIFCL_HUMAN Eukaryotic translation initiation factor 3 subunit C-like protein OS=Homo sapiens OX=9606 GN=EIF3CL PE=1 SV=1	5	12	12	1	0	0	6	7	6	9	9	8	1	0	0	6	7	6	9	9	8	16.8	16.8	105.34	913	913;914;132;79;148	0	99.87	1.1	0	0	9.1	9.6	9.4	13.3	13.1	12.2	1786200000	0	0	0	252870000	190730000	151580000	478620000
Q969V3;K7EMW4;K7ENM2;A0A0C4DGP7;K7ELZ9;K7EQ66	Q969V3;K7EMW4;K7ENM2;A0A0C4DGP7	Nicalin	NCLN	sp|Q969V3|NCLN_HUMAN Nicalin OS=Homo sapiens OX=9606 GN=NCLN PE=1 SV=2;tr|K7EMW4|K7EMW4_HUMAN Nicalin OS=Homo sapiens OX=9606 GN=NCLN PE=1 SV=1;tr|K7ENM2|K7ENM2_HUMAN Nicalin (Fragment) OS=Homo sapiens OX=9606 GN=NCLN PE=1 SV=1;tr|A0A0C4DGP7|A0A0C4DGP7_HUM	6	14	14	0	0	0	7	9	8	6	11	12	0	0	0	7	9	8	6	11	12	33.9	33.9	62.974	563	563;489;328;350;282;110	0	99.509	0	0	0	16.7	20.2	20.8	14.4	26.6	29	5034000000	0	0	0	572240000	901020000	631920000	842100000
P62917;E9PKZ0;G3V1A1;E9PKU4;E9PP36	P62917;E9PKZ0;G3V1A1;E9PKU4	60S ribosomal protein L8	RPL8	sp|P62917|RL8_HUMAN 60S ribosomal protein L8 OS=Homo sapiens OX=9606 GN=RPL8 PE=1 SV=2;tr|E9PKZ0|E9PKZ0_HUMAN 60S ribosomal protein L8 (Fragment) OS=Homo sapiens OX=9606 GN=RPL8 PE=1 SV=1;tr|G3V1A1|G3V1A1_HUMAN 60S ribosomal protein L8 OS=Homo sapiens OX=9	5	9	9	6	4	6	9	6	7	7	8	7	6	4	6	9	6	7	7	8	7	48.6	48.6	28.024	257	257;205;167;235;148	0	99.291	30.7	22.6	30.7	48.6	31.1	41.2	41.2	44.4	41.2	17507000000	417550000	465970000	544350000	2339800000	1799600000	1976100000	3120200000
A0A087X0X3;P52272;M0R019;M0R2T0;M0R0N3;M0QZM1;M0QYQ7;M0R0Y6;M0R2I7;M0QY96;M0QYL3	A0A087X0X3;P52272	Heterogeneous nuclear ribonucleoprotein M	HNRNPM	tr|A0A087X0X3|A0A087X0X3_HUMAN Heterogeneous nuclear ribonucleoprotein M OS=Homo sapiens OX=9606 GN=HNRNPM PE=1 SV=1;sp|P52272|HNRPM_HUMAN Heterogeneous nuclear ribonucleoprotein M OS=Homo sapiens OX=9606 GN=HNRNPM PE=1 SV=3	11	25	25	5	3	3	21	12	15	14	18	16	5	3	3	21	12	15	14	18	16	44.7	44.7	77.569	730	730;730;352;357;275;383;219;99;214;116;99	0	99.166	11	7.4	6.3	40.3	25.3	29.7	27.8	32.9	32.2	11237000000	37737000	24287000	24193000	2007700000	1631100000	1315600000	1907800000
Q8TEX9;H0YN14;H0YMR4;H0YLV0;H0YL92;H0YN07;H0YKG5;H0YK93	Q8TEX9;H0YN14	Importin-4	IPO4	sp|Q8TEX9|IPO4_HUMAN Importin-4 OS=Homo sapiens OX=9606 GN=IPO4 PE=1 SV=2;tr|H0YN14|H0YN14_HUMAN Importin-4 OS=Homo sapiens OX=9606 GN=IPO4 PE=1 SV=1	8	26	26	0	0	0	15	15	14	16	15	18	0	0	0	15	15	14	16	15	18	32.3	32.3	118.71	1081	1081;911;547;98;101;312;154;48	0	98.973	0	0	0	17.9	18.1	17.3	18	18.4	24.1	6209500000	0	0	0	988240000	820290000	666090000	1299000000
Q15758;M0QXM4;M0QX44;M0R144	Q15758;M0QXM4	Neutral amino acid transporter B(0);Amino acid transporter	SLC1A5	sp|Q15758|AAAT_HUMAN Neutral amino acid transporter B(0) OS=Homo sapiens OX=9606 GN=SLC1A5 PE=1 SV=2;tr|M0QXM4|M0QXM4_HUMAN Amino acid transporter OS=Homo sapiens OX=9606 GN=SLC1A5 PE=1 SV=1	4	11	11	0	0	0	9	8	8	9	10	7	0	0	0	9	8	8	9	10	7	27.5	27.5	56.598	541	541;365;258;29	0	98.913	0	0	0	26.8	25	25	25.5	27	23.1	8430500000	0	0	0	1167400000	1313700000	794470000	1945000000
Q70UQ0	Q70UQ0	Inhibitor of nuclear factor kappa-B kinase-interacting protein	IKBIP	sp|Q70UQ0|IKIP_HUMAN Inhibitor of nuclear factor kappa-B kinase-interacting protein OS=Homo sapiens OX=9606 GN=IKBIP PE=1 SV=1	1	11	11	0	0	0	9	5	6	9	10	5	0	0	0	9	5	6	9	10	5	31.1	31.1	39.309	350	350	0	98.639	0	0	0	25.1	15.1	16.9	25.7	27.7	14.3	2645600000	0	0	0	464610000	374980000	240770000	632740000
Q99536;K7ERT7;K7ESA3;K7ENX2;K7EM19;K7EJM4;K7ER81	Q99536;K7ERT7	Synaptic vesicle membrane protein VAT-1 homolog	VAT1	sp|Q99536|VAT1_HUMAN Synaptic vesicle membrane protein VAT-1 homolog OS=Homo sapiens OX=9606 GN=VAT1 PE=1 SV=2;tr|K7ERT7|K7ERT7_HUMAN Synaptic vesicle membrane protein VAT-1 homolog (Fragment) OS=Homo sapiens OX=9606 GN=VAT1 PE=1 SV=1	7	14	14	2	3	2	9	10	10	11	13	13	2	3	2	9	10	10	11	13	13	45.3	45.3	41.92	393	393;146;125;151;154;30;92	0	98.528	7.6	11.7	7.6	36.4	37.4	37.4	34.1	43.8	42.7	5875100000	19313000	12919000	14366000	702010000	704470000	509560000	1309800000
P04844;Q5JYR7;Q5JYR4;H0Y5M1;F2Z3K5;Q5JYR3	P04844	Dolichyl-diphosphooligosaccharide--protein glycosyltransferase subunit 2	RPN2	sp|P04844|RPN2_HUMAN Dolichyl-diphosphooligosaccharide--protein glycosyltransferase subunit 2 OS=Homo sapiens OX=9606 GN=RPN2 PE=1 SV=3	6	18	18	2	3	2	11	9	7	10	14	9	2	3	2	11	9	7	10	14	9	39.9	39.9	69.283	631	631;344;166;147;162;138	0	98.479	6	7.4	6	24.9	26.8	24.7	23.9	29.8	22.7	6566800000	14701000	26378000	13689000	888360000	781170000	675430000	1368900000
A0A2R8YDT1;P15104	A0A2R8YDT1;P15104	Glutamine synthetase	GLUL	tr|A0A2R8YDT1|A0A2R8YDT1_HUMAN Glutamine synthetase OS=Homo sapiens OX=9606 GN=GLUL PE=1 SV=1;sp|P15104|GLNA_HUMAN Glutamine synthetase OS=Homo sapiens OX=9606 GN=GLUL PE=1 SV=4	2	5	5	1	3	2	1	1	3	0	1	4	1	3	2	1	1	3	0	1	4	11.4	11.4	57.174	507	507;373	0	98.361	3	8.5	6.9	3	3.9	7.1	0	3	9.9	588600000	6576300	15904000	8282900	33856000	0	188480000	0
P38646;A0A3B3ITI4;D6RA73;D6RJI2;H0Y8S0;H0YBG6;A0A3B3ITN1	P38646	Stress-70 protein, mitochondrial	HSPA9	sp|P38646|GRP75_HUMAN Stress-70 protein, mitochondrial OS=Homo sapiens OX=9606 GN=HSPA9 PE=1 SV=2	7	23	23	7	5	6	16	14	12	17	13	17	7	5	6	16	14	12	17	13	17	47.1	47.1	73.68	679	679;180;62;95;102;163;43	0	97.929	14.6	11.3	12.1	32.7	29.9	27	39.5	27.7	32.4	4992600000	66153000	30571000	56943000	520950000	686490000	563860000	1125400000
P61266	P61266	Syntaxin-1B	STX1B	sp|P61266|STX1B_HUMAN Syntaxin-1B OS=Homo sapiens OX=9606 GN=STX1B PE=1 SV=1	1	11	11	3	4	3	1	0	5	0	0	7	3	4	3	1	0	5	0	0	7	52.8	52.8	33.244	288	288	0	97.924	12.8	16.3	17.4	4.9	0	24.7	0	0	32.3	780600000	29186000	36493000	33260000	19305000	0	260140000	0
O95573;F5GWH2;F5H062	O95573	Long-chain-fatty-acid--CoA ligase 3	ACSL3	sp|O95573|ACSL3_HUMAN Long-chain-fatty-acid--CoA ligase 3 OS=Homo sapiens OX=9606 GN=ACSL3 PE=1 SV=3	3	23	21	1	3	1	15	12	10	16	15	15	0	1	0	14	10	8	14	13	14	44.2	40.1	80.419	720	720;141;95	0	97.657	2.5	6.1	2.5	28.9	24.9	20.6	30.1	31.7	33.3	7771400000	9238800	24601000	13476000	1150900000	902290000	614020000	1897800000
P13674	P13674	Prolyl 4-hydroxylase subunit alpha-1	P4HA1	sp|P13674|P4HA1_HUMAN Prolyl 4-hydroxylase subunit alpha-1 OS=Homo sapiens OX=9606 GN=P4HA1 PE=1 SV=2	1	17	17	5	6	5	11	11	9	13	11	10	5	6	5	11	11	9	13	11	10	43.1	43.1	61.049	534	534	0	97.026	13.1	14	16.9	30.3	29.2	26.2	34.6	30.1	29.4	3608400000	56267000	49238000	46785000	553520000	511090000	350290000	733150000
Q14139;B7Z7P0	Q14139;B7Z7P0	Ubiquitin conjugation factor E4 A	UBE4A	sp|Q14139|UBE4A_HUMAN Ubiquitin conjugation factor E4 A OS=Homo sapiens OX=9606 GN=UBE4A PE=1 SV=2;tr|B7Z7P0|B7Z7P0_HUMAN Ubiquitin conjugation factor E4 A OS=Homo sapiens OX=9606 GN=UBE4A PE=1 SV=1	2	21	21	0	0	0	12	11	8	15	15	14	0	0	0	12	11	8	15	15	14	25	25	122.56	1066	1066;538	0	96.811	0	0	0	16.3	13.8	10.5	17.6	19.2	18.2	2458000000	0	0	0	300440000	242080000	205660000	571680000
O14787;A0A075B780;K7ESC1;K7ESG1	O14787;A0A075B780	Transportin-2	TNPO2	sp|O14787|TNPO2_HUMAN Transportin-2 OS=Homo sapiens OX=9606 GN=TNPO2 PE=1 SV=3;tr|A0A075B780|A0A075B780_HUMAN Transportin-2 OS=Homo sapiens OX=9606 GN=TNPO2 PE=1 SV=1	4	21	15	0	0	0	12	12	9	11	12	14	0	0	0	9	7	7	8	9	12	31.5	24.2	101.39	897	897;766;109;117	0	96.492	0	0	0	18.4	19.2	18.3	17.5	17.5	24.2	4933500000	0	0	0	628430000	578780000	561420000	707140000
O43776;K7EQ35;K7EJ19;K7EIU7;K7EPK2;K7EMQ6	O43776	Asparagine--tRNA ligase, cytoplasmic	NARS	sp|O43776|SYNC_HUMAN Asparagine--tRNA ligase, cytoplasmic OS=Homo sapiens OX=9606 GN=NARS1 PE=1 SV=1	6	18	18	2	2	1	12	9	8	12	15	13	2	2	1	12	9	8	12	15	13	39.4	39.4	62.942	548	548;167;136;162;163;128	0	96	4.6	4.6	4.2	30.5	25.4	21.4	33	37.8	32.5	4777800000	5740800	8582100	0	845120000	577910000	301320000	848170000
O94808;E5RJP4	O94808	Glutamine--fructose-6-phosphate aminotransferase [isomerizing] 2	GFPT2	sp|O94808|GFPT2_HUMAN Glutamine--fructose-6-phosphate aminotransferase [isomerizing] 2 OS=Homo sapiens OX=9606 GN=GFPT2 PE=1 SV=3	2	25	21	0	2	0	16	14	11	15	19	14	0	1	0	14	12	9	12	16	11	46.2	38.7	76.93	682	682;216	0	95.934	0	5.4	0	29.5	27	22.7	29.5	36.8	29.5	2974100000	0	2208500	0	495620000	351260000	221640000	580060000
P22626;A0A087WUI2	P22626;A0A087WUI2	Heterogeneous nuclear ribonucleoproteins A2/B1	HNRNPA2B1	sp|P22626|ROA2_HUMAN Heterogeneous nuclear ribonucleoproteins A2/B1 OS=Homo sapiens OX=9606 GN=HNRNPA2B1 PE=1 SV=2;tr|A0A087WUI2|A0A087WUI2_HUMAN Heterogeneous nuclear ribonucleoproteins A2/B1 OS=Homo sapiens OX=9606 GN=HNRNPA2B1 PE=1 SV=1	2	19	19	2	4	3	12	9	11	9	11	14	2	4	3	12	9	11	9	11	14	53.5	53.5	37.429	353	353;261	0	95.915	5.1	11.9	11.6	35.7	28.6	35.7	33.1	34	40.5	7050300000	0	33388000	44687000	882240000	696730000	1118100000	837370000
Q8N556;Q8TED9	Q8N556	Actin filament-associated protein 1	AFAP1	sp|Q8N556|AFAP1_HUMAN Actin filament-associated protein 1 OS=Homo sapiens OX=9606 GN=AFAP1 PE=1 SV=2	2	9	9	0	0	0	5	3	4	4	6	5	0	0	0	5	3	4	4	6	5	17.5	17.5	80.724	730	730;768	0	95.887	0	0	0	10.7	6.7	7.7	7.9	12.7	8.9	987760000	0	0	0	140880000	22284000	108030000	192200000
Q6DD88;F5H6I7;F5GWF8	Q6DD88;F5H6I7	Atlastin-3	ATL3	sp|Q6DD88|ATLA3_HUMAN Atlastin-3 OS=Homo sapiens OX=9606 GN=ATL3 PE=1 SV=1;tr|F5H6I7|F5H6I7_HUMAN Atlastin-3 OS=Homo sapiens OX=9606 GN=ATL3 PE=1 SV=1	3	12	12	0	0	0	5	5	7	7	7	11	0	0	0	5	5	7	7	7	11	44.2	44.2	60.541	541	541;523;169	0	95.191	0	0	0	21.1	17.2	25.9	25.5	25.9	40.7	2747500000	0	0	0	313070000	230100000	334520000	437950000
F5H6E2;O00159;I3L501;I3L3Y6;I3L3F5	F5H6E2;O00159	Unconventional myosin-Ic	MYO1C	tr|F5H6E2|F5H6E2_HUMAN Unconventional myosin-Ic OS=Homo sapiens OX=9606 GN=MYO1C PE=1 SV=1;sp|O00159|MYO1C_HUMAN Unconventional myosin-Ic OS=Homo sapiens OX=9606 GN=MYO1C PE=1 SV=4	5	32	32	4	4	4	21	17	18	21	21	18	4	4	4	21	17	18	21	21	18	42.4	42.4	118.99	1039	1039;1063;168;170;137	0	95.16	4.7	5	5.4	25.7	22.6	23.9	27.3	26.6	23.4	10732000000	27176000	14036000	37289000	1776800000	1148000000	1264900000	2247900000
P16435;H0Y4R2;E7EMD0;C9JU80	P16435;H0Y4R2;E7EMD0	NADPH--cytochrome P450 reductase	POR	sp|P16435|NCPR_HUMAN NADPH--cytochrome P450 reductase OS=Homo sapiens OX=9606 GN=POR PE=1 SV=2;tr|H0Y4R2|H0Y4R2_HUMAN NADPH--cytochrome P450 reductase (Fragment) OS=Homo sapiens OX=9606 GN=POR PE=1 SV=1;tr|E7EMD0|E7EMD0_HUMAN NADPH--cytochrome P450 reducta	4	19	19	0	0	0	12	6	7	10	11	12	0	0	0	12	6	7	10	11	12	36.5	36.5	76.689	677	677;725;418;108	0	94.629	0	0	0	25.6	12.3	14.9	21.1	21	29.5	1983800000	0	0	0	256900000	132420000	136460000	411610000
O94822;H7BYG8;S4R3T2	O94822	E3 ubiquitin-protein ligase listerin	LTN1	sp|O94822|LTN1_HUMAN E3 ubiquitin-protein ligase listerin OS=Homo sapiens OX=9606 GN=LTN1 PE=1 SV=6	3	25	25	0	0	0	15	14	14	17	14	18	0	0	0	15	14	14	17	14	18	17.9	17.9	200.55	1766	1766;767;366	0	94.384	0	0	0	12	10.4	11	13.6	10.1	12.7	3992500000	0	0	0	462740000	597780000	420300000	1018700000
P04792;F8WE04;C9J3N8	P04792;F8WE04	Heat shock protein beta-1	HSPB1	sp|P04792|HSPB1_HUMAN Heat shock protein beta-1 OS=Homo sapiens OX=9606 GN=HSPB1 PE=1 SV=2;tr|F8WE04|F8WE04_HUMAN Heat shock protein beta-1 OS=Homo sapiens OX=9606 GN=HSPB1 PE=1 SV=1	3	12	12	7	6	4	10	9	8	8	9	9	7	6	4	10	9	8	8	9	9	77.1	77.1	22.782	205	205;186;37	0	94.15	47.3	41	36.1	63.4	58.5	65.9	58.5	58.5	65.9	16508000000	169370000	73325000	156970000	1883000000	2097000000	1884100000	3047000000
Q01518;Q5T0R1;Q5T0R9;Q5T0R7;Q5T0R6;Q5T0R5;Q5T0R4;Q5T0R3;Q5T0R2;Q5T0S3;Q5T0R8	Q01518	Adenylyl cyclase-associated protein 1	CAP1	sp|Q01518|CAP1_HUMAN Adenylyl cyclase-associated protein 1 OS=Homo sapiens OX=9606 GN=CAP1 PE=1 SV=5	11	17	17	9	8	7	10	11	11	10	13	13	9	8	7	10	11	11	10	13	13	39.8	39.8	51.901	475	475;215;262;174;176;179;201;203;208;145;58	0	93.917	28	25.3	20.8	28.2	30.5	30.5	28	30.1	33.5	11880000000	142250000	164840000	116660000	1594100000	1739900000	1215500000	2610100000
P12004	P12004	Proliferating cell nuclear antigen	PCNA	sp|P12004|PCNA_HUMAN Proliferating cell nuclear antigen OS=Homo sapiens OX=9606 GN=PCNA PE=1 SV=1	1	8	8	3	2	1	7	7	6	6	7	7	3	2	1	7	7	6	6	7	7	52.9	52.9	28.768	261	261	0	93.191	21.1	16.1	7.3	41.8	50.2	39.1	46	50.2	50.2	3950800000	5112000	19695000	18711000	597040000	369340000	422390000	937660000
P12236	P12236	ADP/ATP translocase 3;ADP/ATP translocase 3, N-terminally processed	SLC25A6	sp|P12236|ADT3_HUMAN ADP/ATP translocase 3 OS=Homo sapiens OX=9606 GN=SLC25A6 PE=1 SV=4	1	18	5	6	6	5	14	12	13	10	10	14	1	0	1	3	2	3	2	2	4	61.4	18.8	32.866	298	298	0	92.539	26.8	21.5	19.1	47	43	48.3	36.9	37.6	52.3	31650000000	202930000	482090000	170890000	5254500000	3941100000	3617400000	4835000000
P09936;D6R956;D6RE83;D6R974;D6RF53	P09936;D6R956;D6RE83;D6R974	Ubiquitin carboxyl-terminal hydrolase isozyme L1;Ubiquitin carboxyl-terminal hydrolase	UCHL1	sp|P09936|UCHL1_HUMAN Ubiquitin carboxyl-terminal hydrolase isozyme L1 OS=Homo sapiens OX=9606 GN=UCHL1 PE=1 SV=2;tr|D6R956|D6R956_HUMAN Ubiquitin carboxyl-terminal hydrolase OS=Homo sapiens OX=9606 GN=UCHL1 PE=1 SV=1;tr|D6RE83|D6RE83_HUMAN Ubiquitin carbo	5	14	14	4	5	4	11	8	10	10	11	10	4	5	4	11	8	10	10	11	10	65	65	24.824	223	223;241;207;156;58	0	92.382	21.5	31.4	21.5	47.1	36.8	46.6	49.8	53.4	54.3	6804000000	71976000	68399000	57616000	802010000	839370000	791200000	1204300000
P63172	P63172	Dynein light chain Tctex-type 1	DYNLT1	sp|P63172|DYLT1_HUMAN Dynein light chain Tctex-type 1 OS=Homo sapiens OX=9606 GN=DYNLT1 PE=1 SV=1	1	2	2	0	0	0	1	1	2	1	1	1	0	0	0	1	1	2	1	1	1	30.1	30.1	12.452	113	113	0	92.2	0	0	0	15.9	15.9	30.1	15.9	15.9	15.9	271810000	0	0	0	25991000	12729000	81260000	43545000
A0A1W2PPS1;Q00839;A0A1W2PP35;Q5RI18;A0A1X7SBS1;A0A1W2PQL0;A0A1W2PP34;A0A1W2PPL4;A0A1W2PPH7;A0A1W2PRZ7;A0A1W2PQ74;A0A1W2PQD4;A0A1W2PPE9;A0A1W2PRI6;A0A1W2PP22	A0A1W2PPS1;Q00839;A0A1W2PP35;Q5RI18;A0A1X7SBS1;A0A1W2PQL0;A0A1W2PP34;A0A1W2PPL4;A0A1W2PPH7;A0A1W2PRZ7;A0A1W2PQ74;A0A1W2PQD4	Heterogeneous nuclear ribonucleoprotein U	HNRNPU	tr|A0A1W2PPS1|A0A1W2PPS1_HUMAN Heterogeneous nuclear ribonucleoprotein U OS=Homo sapiens OX=9606 GN=HNRNPU PE=1 SV=1;sp|Q00839|HNRPU_HUMAN Heterogeneous nuclear ribonucleoprotein U OS=Homo sapiens OX=9606 GN=HNRNPU PE=1 SV=6;tr|A0A1W2PP35|A0A1W2PP35_HUMAN	15	22	22	6	5	5	16	13	14	15	14	15	6	5	5	16	13	14	15	14	15	31.1	31.1	88.317	804	804;825;728;602;744;527;546;547;549;302;372;327;48;128;181	0	91.758	11.1	7	9.3	26.1	24.3	24.3	24.8	24.3	25.2	13567000000	107140000	73023000	158370000	2045100000	2092100000	1707900000	2206400000
Q15907;H3BMH2;H3BSC1;P62491;B4DQU5;M0R2D0	Q15907;H3BMH2;H3BSC1;P62491	Ras-related protein Rab-11B;Ras-related protein Rab-11A	RAB11B;RAB11A	sp|Q15907|RB11B_HUMAN Ras-related protein Rab-11B OS=Homo sapiens OX=9606 GN=RAB11B PE=1 SV=4;tr|H3BMH2|H3BMH2_HUMAN Ras-related protein Rab-11A (Fragment) OS=Homo sapiens OX=9606 GN=RAB11A PE=4 SV=1;tr|H3BSC1|H3BSC1_HUMAN Ras-related protein Rab-11A OS=Ho	6	8	8	0	1	0	6	4	4	5	7	4	0	1	0	6	4	4	5	7	4	45.9	45.9	24.488	218	218;155;198;216;146;60	0	91.057	0	4.1	0	35.8	23.4	23.4	28.9	41.7	23.4	3190400000	0	1893900	0	478940000	336720000	318650000	695620000
P06748;E5RGW4;E5RI98	P06748	Nucleophosmin	NPM1	sp|P06748|NPM_HUMAN Nucleophosmin OS=Homo sapiens OX=9606 GN=NPM1 PE=1 SV=2	3	7	7	2	2	3	7	6	6	5	7	6	2	2	3	7	6	6	5	7	6	36.7	36.7	32.575	294	294;59;111	0	90.615	11.6	11.6	16.3	36.7	34	36.7	29.6	36.7	36.7	6813400000	110630000	70840000	77780000	1354500000	875450000	607200000	849730000
Q86W92;F5GZP6;A0A0A0MTP2;F5H495;H0YGH8;H0YFE4;F5H6Q7;F5H0E0;E9PP16;Q8ND30	Q86W92;F5GZP6	Liprin-beta-1	PPFIBP1	sp|Q86W92|LIPB1_HUMAN Liprin-beta-1 OS=Homo sapiens OX=9606 GN=PPFIBP1 PE=1 SV=2;tr|F5GZP6|F5GZP6_HUMAN Liprin-beta-1 (Fragment) OS=Homo sapiens OX=9606 GN=PPFIBP1 PE=1 SV=1	10	12	12	0	0	0	9	7	4	6	7	6	0	0	0	9	7	4	6	7	6	17.4	17.4	114.02	1011	1011;744;281;152;205;242;86;109;718;876	0	90.47	0	0	0	12.3	12.6	6.2	11.2	11.7	10	1055000000	0	0	0	231650000	147050000	125150000	152200000
O00264	O00264	Membrane-associated progesterone receptor component 1	PGRMC1	sp|O00264|PGRC1_HUMAN Membrane-associated progesterone receptor component 1 OS=Homo sapiens OX=9606 GN=PGRMC1 PE=1 SV=3	1	10	9	0	0	0	6	8	9	7	10	8	0	0	0	5	7	8	6	9	7	59	54.4	21.671	195	195	0	89.877	0	0	0	44.1	54.4	54.9	37.4	59	53.3	3493500000	0	0	0	212870000	580310000	475930000	561570000
Q9HD20;H7C3H2	Q9HD20	Manganese-transporting ATPase 13A1	ATP13A1	sp|Q9HD20|AT131_HUMAN Manganese-transporting ATPase 13A1 OS=Homo sapiens OX=9606 GN=ATP13A1 PE=1 SV=2	2	27	27	0	0	0	13	13	7	18	19	14	0	0	0	13	13	7	18	19	14	30.4	30.4	132.95	1204	1204;185	0	89.693	0	0	0	15	16.4	9.2	20	22.4	15.8	4002300000	0	0	0	393040000	428770000	188960000	959820000
O75396;A0A087X1A9	O75396	Vesicle-trafficking protein SEC22b	SEC22B	sp|O75396|SC22B_HUMAN Vesicle-trafficking protein SEC22b OS=Homo sapiens OX=9606 GN=SEC22B PE=1 SV=4	2	7	7	1	2	0	5	5	6	5	5	6	1	2	0	5	5	6	5	5	6	38.6	38.6	24.593	215	215;79	0	89.541	6.5	11.2	0	25.1	25.1	34	25.1	25.1	34	4478000000	0	14507000	0	494930000	601810000	439200000	1012900000
A0A286YFF8;Q7Z3U7;F8VZV1;F8VZV6;F8VQS2	A0A286YFF8;Q7Z3U7;F8VZV1	Protein MON2 homolog	MON2	tr|A0A286YFF8|A0A286YFF8_HUMAN Protein MON2 homolog OS=Homo sapiens OX=9606 GN=MON2 PE=1 SV=1;sp|Q7Z3U7|MON2_HUMAN Protein MON2 homolog OS=Homo sapiens OX=9606 GN=MON2 PE=1 SV=3;tr|F8VZV1|F8VZV1_HUMAN Protein MON2 homolog OS=Homo sapiens OX=9606 GN=MON2 PE	5	34	34	0	0	0	19	15	14	20	23	16	0	0	0	19	15	14	20	23	16	26.2	26.2	190.48	1718	1718;1717;1072;43;59	0	88.732	0	0	0	13.9	12	10.1	17.4	17.5	12.6	3679100000	0	0	0	711320000	349700000	334630000	758820000
Q9HC07;V9GY93;D6RBL0;D6RD79	Q9HC07;V9GY93	Transmembrane protein 165	TMEM165	sp|Q9HC07|TM165_HUMAN Transmembrane protein 165 OS=Homo sapiens OX=9606 GN=TMEM165 PE=1 SV=1;tr|V9GY93|V9GY93_HUMAN GDT1 family protein (Fragment) OS=Homo sapiens OX=9606 GN=TMEM165 PE=1 SV=1	4	6	6	0	0	0	6	5	5	6	5	5	0	0	0	6	5	5	6	5	5	28.4	28.4	34.905	324	324;158;76;129	0	88.497	0	0	0	28.4	20.4	20.4	28.4	20.4	20.4	4579800000	0	0	0	728370000	670060000	443630000	878370000
Q13200;H7C1H2;C9JPC0;H7C2Q3;F8WBS8	Q13200	26S proteasome non-ATPase regulatory subunit 2	PSMD2	sp|Q13200|PSMD2_HUMAN 26S proteasome non-ATPase regulatory subunit 2 OS=Homo sapiens OX=9606 GN=PSMD2 PE=1 SV=3	5	27	27	2	4	3	16	13	9	17	18	19	2	4	3	16	13	9	17	18	19	41.2	41.2	100.2	908	908;203;217;143;59	0	88.482	4.2	7	5.2	25.6	21	14	26.8	29.6	31.9	6750700000	31144000	9548900	54630000	880880000	843940000	578230000	1689600000
A0A0G2JIW1;P0DMV9;P0DMV8;V9GZ37	A0A0G2JIW1;P0DMV9;P0DMV8;V9GZ37	Heat shock 70 kDa protein 1B;Heat shock 70 kDa protein 1A	HSPA1B;HSPA1A	tr|A0A0G2JIW1|A0A0G2JIW1_HUMAN Heat shock 70 kDa protein 1B OS=Homo sapiens OX=9606 GN=HSPA1B PE=1 SV=1;sp|P0DMV9|HS71B_HUMAN Heat shock 70 kDa protein 1B OS=Homo sapiens OX=9606 GN=HSPA1B PE=1 SV=1;sp|P0DMV8|HS71A_HUMAN Heat shock 70 kDa protein 1A OS=Hom	4	23	13	6	4	2	16	17	14	15	17	15	1	2	1	8	9	7	8	8	8	47.8	25.9	70.108	642	642;641;641;476	0	88.477	14.6	11.7	4.4	42.2	42.4	33.2	36.9	41.1	39.7	5921100000	35480000	19286000	10218000	772410000	909460000	585220000	1333500000
P39023;G5E9G0;H7C422;B5MCW2;H7C3M2;F8WCR1;Q92901	P39023;G5E9G0;H7C422;B5MCW2;H7C3M2	60S ribosomal protein L3	RPL3	sp|P39023|RL3_HUMAN 60S ribosomal protein L3 OS=Homo sapiens OX=9606 GN=RPL3 PE=1 SV=2;tr|G5E9G0|G5E9G0_HUMAN 60S ribosomal protein L3 OS=Homo sapiens OX=9606 GN=RPL3 PE=1 SV=1;tr|H7C422|H7C422_HUMAN 60S ribosomal protein L3 (Fragment) OS=Homo sapiens OX=9	7	18	18	14	8	13	14	13	12	11	13	11	14	8	13	14	13	12	11	13	11	43.9	43.9	46.108	403	403;351;305;272;261;180;407	0	88.269	37	20.3	36.5	36	31.5	29.5	28.3	31.5	32	27681000000	985950000	514850000	1418100000	4752300000	3635200000	2471300000	3645500000
Q9Y5L0;C9J7E5;E9PFH4	Q9Y5L0;C9J7E5;E9PFH4	Transportin-3	TNPO3	sp|Q9Y5L0|TNPO3_HUMAN Transportin-3 OS=Homo sapiens OX=9606 GN=TNPO3 PE=1 SV=3;tr|C9J7E5|C9J7E5_HUMAN Transportin-3 OS=Homo sapiens OX=9606 GN=TNPO3 PE=1 SV=1;tr|E9PFH4|E9PFH4_HUMAN Transportin-3 OS=Homo sapiens OX=9606 GN=TNPO3 PE=1 SV=1	3	21	21	0	0	0	14	11	9	13	18	13	0	0	0	14	11	9	13	18	13	31.3	31.3	104.2	923	923;957;857	0	88.026	0	0	0	20	16.1	15	20.2	27.2	20.9	6141800000	0	0	0	1138500000	904790000	520170000	1112500000
P37802;X6RJP6	P37802;X6RJP6	Transgelin-2	TAGLN2	sp|P37802|TAGL2_HUMAN Transgelin-2 OS=Homo sapiens OX=9606 GN=TAGLN2 PE=1 SV=3;tr|X6RJP6|X6RJP6_HUMAN Transgelin-2 (Fragment) OS=Homo sapiens OX=9606 GN=TAGLN2 PE=1 SV=1	2	10	9	4	4	6	9	9	8	7	8	4	4	3	5	8	8	7	6	7	4	56.3	49.2	22.391	199	199;187	0	88.018	26.1	24.1	39.2	50.8	50.8	50.3	43.2	50.8	27.6	7496600000	57713000	98055000	65733000	1292500000	1208600000	791420000	1240600000
Q14152	Q14152	Eukaryotic translation initiation factor 3 subunit A	EIF3A	sp|Q14152|EIF3A_HUMAN Eukaryotic translation initiation factor 3 subunit A OS=Homo sapiens OX=9606 GN=EIF3A PE=1 SV=1	1	22	22	3	3	2	14	15	11	12	15	13	3	3	2	14	15	11	12	15	13	19.3	19.3	166.57	1382	1382	0	87.594	3	2.9	1.7	12.3	12.7	10.5	11.2	14.5	11.8	3929300000	16902000	4918800	48866000	644340000	498590000	348260000	904890000
P81605	P81605	Dermcidin;Survival-promoting peptide;DCD-1	DCD	sp|P81605|DCD_HUMAN Dermcidin OS=Homo sapiens OX=9606 GN=DCD PE=1 SV=2	1	6	6	5	3	6	3	3	3	2	2	4	5	3	6	3	3	3	2	2	4	53.6	53.6	11.284	110	110	0	87.584	47.3	22.7	53.6	24.5	25.5	25.5	12.7	12.7	35.5	8601200000	710320000	827920000	1371600000	869820000	643350000	1540100000	473360000
Q9P253;H0YMC9;H0YLM6	Q9P253	Vacuolar protein sorting-associated protein 18 homolog	VPS18	sp|Q9P253|VPS18_HUMAN Vacuolar protein sorting-associated protein 18 homolog OS=Homo sapiens OX=9606 GN=VPS18 PE=1 SV=2	3	16	16	0	1	0	8	8	8	11	12	10	0	1	0	8	8	8	11	12	10	24.9	24.9	110.18	973	973;121;130	0	86.86	0	1.1	0	13.7	11.2	12.6	17.5	19.4	16.4	2107000000	0	452430	0	271650000	206410000	213630000	409530000
P24390;M0R1Y2	P24390;M0R1Y2	ER lumen protein-retaining receptor 1;ER lumen protein-retaining receptor	KDELR1	sp|P24390|ERD21_HUMAN ER lumen protein-retaining receptor 1 OS=Homo sapiens OX=9606 GN=KDELR1 PE=1 SV=1;tr|M0R1Y2|M0R1Y2_HUMAN ER lumen protein-retaining receptor 1 (Fragment) OS=Homo sapiens OX=9606 GN=KDELR1 PE=1 SV=1	2	3	2	0	0	0	1	1	2	0	2	2	0	0	0	1	1	2	0	1	2	20.8	14.6	24.542	212	212;220	0	86.468	0	0	0	9	9	14.6	0	15.1	14.6	1075500000	0	0	0	58629000	26250000	151330000	0
P62280;M0QZC5;M0R1H5;M0R1H6	P62280;M0QZC5	40S ribosomal protein S11	RPS11	sp|P62280|RS11_HUMAN 40S ribosomal protein S11 OS=Homo sapiens OX=9606 GN=RPS11 PE=1 SV=3;tr|M0QZC5|M0QZC5_HUMAN 40S ribosomal protein S11 OS=Homo sapiens OX=9606 GN=RPS11 PE=1 SV=1	4	11	11	5	7	3	6	4	4	4	6	4	5	7	3	6	4	4	4	6	4	48.7	48.7	18.431	158	158;118;79;88	0	86.439	34.2	37.3	23.4	43.7	29.1	29.1	29.1	29.7	29.1	9983000000	211960000	312150000	243540000	1726200000	1456000000	998820000	1582100000
O15460;E7ENX0;E7EPI9;E7ERI1;C9JCP0;C9JX45;A8MXE0;C9JN43;C9JIG4	O15460	Prolyl 4-hydroxylase subunit alpha-2	P4HA2	sp|O15460|P4HA2_HUMAN Prolyl 4-hydroxylase subunit alpha-2 OS=Homo sapiens OX=9606 GN=P4HA2 PE=1 SV=1	9	15	15	3	4	3	11	11	14	11	11	12	3	4	3	11	11	14	11	11	12	41.7	41.7	60.901	535	535;204;236;184;146;153;167;101;114	0	86.229	6.7	9.9	8	29.7	29.5	37.9	29.7	29.7	33.5	5349600000	12351000	13356000	20144000	661800000	834750000	734900000	960360000
D6RG15;Q6IBS0;H0Y858	D6RG15;Q6IBS0	Twinfilin-2	TWF2	tr|D6RG15|D6RG15_HUMAN Twinfilin-2 OS=Homo sapiens OX=9606 GN=TWF2 PE=1 SV=1;sp|Q6IBS0|TWF2_HUMAN Twinfilin-2 OS=Homo sapiens OX=9606 GN=TWF2 PE=1 SV=2	3	7	7	0	1	0	6	6	4	4	4	4	0	1	0	6	6	4	4	4	4	44.9	44.9	28.882	254	254;349;1186	0	85.406	0	6.3	0	37.8	37.8	27.2	27.2	27.2	26.8	1628400000	0	3077100	0	229640000	299850000	139590000	338090000
P49736;H0Y8E6	P49736;H0Y8E6	DNA replication licensing factor MCM2	MCM2	sp|P49736|MCM2_HUMAN DNA replication licensing factor MCM2 OS=Homo sapiens OX=9606 GN=MCM2 PE=1 SV=4;tr|H0Y8E6|H0Y8E6_HUMAN DNA helicase (Fragment) OS=Homo sapiens OX=9606 GN=MCM2 PE=1 SV=1	2	15	15	0	0	0	11	11	6	11	13	8	0	0	0	11	11	6	11	13	8	24.3	24.3	101.89	904	904;836	0	85.163	0	0	0	17.6	18.4	9.3	17.1	20.4	12.1	2103400000	0	0	0	328640000	235450000	114520000	509230000
I3L397;I3L504;P63241;Q6IS14;F8WCJ1;C9J7B5;C9J4W5;Q9GZV4	I3L397;I3L504;P63241;Q6IS14	Eukaryotic translation initiation factor 5A;Eukaryotic translation initiation factor 5A-1;Eukaryotic translation initiation factor 5A-1-like	EIF5A;EIF5AL1	tr|I3L397|I3L397_HUMAN Eukaryotic translation initiation factor 5A (Fragment) OS=Homo sapiens OX=9606 GN=EIF5A PE=1 SV=8;tr|I3L504|I3L504_HUMAN Eukaryotic translation initiation factor 5A-1 OS=Homo sapiens OX=9606 GN=EIF5A PE=1 SV=1;sp|P63241|IF5A1_HUMAN E	8	11	11	2	2	1	9	8	9	8	9	9	2	2	1	9	8	9	8	9	9	66.4	66.4	16.019	146	146;186;154;154;105;109;115;153	0	85.071	28.8	24	11.6	65.8	50	66.4	50	50.7	65.8	8066300000	43299000	8924000	8322300	1125500000	1262700000	915930000	1419800000
Q99615;K7ESP1;K7EIH8;K7ELJ8;K7EPP7;K7EK03;K7EJ24;K7EJE9;K7EJL5;K7EN19;K7EJV7;K7ER44	Q99615;K7ESP1;K7EIH8	DnaJ homolog subfamily C member 7	DNAJC7	sp|Q99615|DNJC7_HUMAN DnaJ homolog subfamily C member 7 OS=Homo sapiens OX=9606 GN=DNAJC7 PE=1 SV=2;tr|K7ESP1|K7ESP1_HUMAN DnaJ homolog subfamily C member 7 (Fragment) OS=Homo sapiens OX=9606 GN=DNAJC7 PE=1 SV=1;tr|K7EIH8|K7EIH8_HUMAN DnaJ homolog subfamil	12	10	10	0	0	0	6	9	8	9	9	6	0	0	0	6	9	8	9	9	6	29.8	29.8	56.44	494	494;258;261;137;253;115;89;74;102;104;113;128	0	84.943	0	0	0	20	27.1	25.1	27.3	27.1	17.6	1685000000	0	0	0	226260000	268230000	177750000	443180000
P27695;G3V3M6;G3V5Q1;G3V3C7;A0A0C4DGK8;G3V5M0;G3V359;H7C4A8;G3V5D9;G3V3Y6	P27695;G3V3M6;G3V5Q1;G3V3C7;A0A0C4DGK8;G3V5M0;G3V359;H7C4A8	DNA-(apurinic or apyrimidinic site) lyase;DNA-(apurinic or apyrimidinic site) lyase, mitochondrial	APEX1	sp|P27695|APEX1_HUMAN DNA-(apurinic or apyrimidinic site) lyase OS=Homo sapiens OX=9606 GN=APEX1 PE=1 SV=2;tr|G3V3M6|G3V3M6_HUMAN DNA-(apurinic or apyrimidinic site) lyase (Fragment) OS=Homo sapiens OX=9606 GN=APEX1 PE=1 SV=1;tr|G3V5Q1|G3V5Q1_HUMAN DNA-(ap	10	14	14	3	2	4	11	11	7	10	11	12	3	2	4	11	11	7	10	11	12	59.7	59.7	35.554	318	318;263;242;174;146;162;172;150;107;41	0	84.825	16	10.1	13.5	47.8	47.8	31.1	47.8	51.3	54.7	4460800000	21678000	18485000	17026000	778890000	621790000	359820000	677630000
B1AKY9;P50993;H0Y7C1;E9PRA5	B1AKY9;P50993;H0Y7C1	Sodium/potassium-transporting ATPase subunit alpha-2	ATP1A2	tr|B1AKY9|B1AKY9_HUMAN Sodium/potassium-transporting ATPase subunit alpha OS=Homo sapiens OX=9606 GN=ATP1A2 PE=1 SV=1;sp|P50993|AT1A2_HUMAN Sodium/potassium-transporting ATPase subunit alpha-2 OS=Homo sapiens OX=9606 GN=ATP1A2 PE=1 SV=1;tr|H0Y7C1|H0Y7C1_HU	4	28	10	12	20	9	14	13	23	13	15	21	2	7	1	2	1	8	0	3	6	33.8	11.7	110.86	1009	1009;1020;714;517	0	84.557	17	26.9	14.2	18.8	17.1	28.8	15.3	20.1	26.8	1642800000	51595000	57963000	83233000	50581000	33883000	653160000	0
Q15019;B5MCX3;C9IZU3;C9J938;C9JB25;C9J2Q4;C9JQJ4;H7C2Y0;C9JZI2;C9IY94;H7C310;A0A1B0GXJ2;C9JFT1;F8WB65;B5MD47;C9JT15;C9JSE7;H7C1T1	Q15019;B5MCX3	Septin-2	SEPT2	sp|Q15019|SEPT2_HUMAN Septin-2 OS=Homo sapiens OX=9606 GN=SEPTIN2 PE=1 SV=1;tr|B5MCX3|B5MCX3_HUMAN Septin-2 OS=Homo sapiens OX=9606 GN=SEPTIN2 PE=1 SV=1	18	13	12	2	2	1	10	8	11	9	8	10	2	2	1	10	8	10	9	8	9	60.4	56	41.487	361	361;321;131;148;173;184;147;188;105;121;161;71;72;80;94;50;52;29	0	84.24	8.9	9.1	4.4	46.3	35.2	49.3	42.4	35.2	46	5829000000	8308500	17339000	4017200	815610000	879900000	776850000	1320800000
O95202	O95202	LETM1 and EF-hand domain-containing protein 1, mitochondrial	LETM1	sp|O95202|LETM1_HUMAN Mitochondrial proton/calcium exchanger protein OS=Homo sapiens OX=9606 GN=LETM1 PE=1 SV=1	1	20	20	0	0	0	16	15	11	13	15	13	0	0	0	16	15	11	13	15	13	34.6	34.6	83.353	739	739	0	84.224	0	0	0	31	28.6	16	21.9	27.6	23.4	4437200000	0	0	0	636340000	572050000	406650000	764230000
J3QRS3;P19105;O14950;J3KTJ1	J3QRS3;P19105;O14950;J3KTJ1	Myosin regulatory light chain 12A;Myosin regulatory light chain 12B	MYL12A;MYL12B	tr|J3QRS3|J3QRS3_HUMAN Myosin regulatory light chain 12A OS=Homo sapiens OX=9606 GN=MYL12A PE=1 SV=1;sp|P19105|ML12A_HUMAN Myosin regulatory light chain 12A OS=Homo sapiens OX=9606 GN=MYL12A PE=1 SV=2;sp|O14950|ML12B_HUMAN Myosin regulatory light chain 12B	4	8	3	3	4	1	7	7	6	5	8	6	1	2	0	3	2	1	2	3	3	60.5	23.2	20.457	177	177;171;172;114	0	84.16	22	27.7	10.2	50.3	54.8	43.5	39.5	60.5	45.2	3455000000	87822000	74021000	36200000	527810000	514770000	411970000	442760000
M0R0F0;P46782;M0R0R2;M0QZN2	M0R0F0;P46782;M0R0R2;M0QZN2	40S ribosomal protein S5;40S ribosomal protein S5, N-terminally processed	RPS5	tr|M0R0F0|M0R0F0_HUMAN 40S ribosomal protein S5 (Fragment) OS=Homo sapiens OX=9606 GN=RPS5 PE=1 SV=1;sp|P46782|RS5_HUMAN 40S ribosomal protein S5 OS=Homo sapiens OX=9606 GN=RPS5 PE=1 SV=4;tr|M0R0R2|M0R0R2_HUMAN 40S ribosomal protein S5 OS=Homo sapiens OX=9	4	12	12	4	4	6	8	6	6	7	8	5	4	4	6	8	6	6	7	8	5	47.5	47.5	22.391	200	200;204;225;134	0	83.615	28.5	29	38	38.5	37.5	28	41.5	38	37	13511000000	112570000	55496000	193510000	2643900000	2574600000	1161200000	2104600000
P62820;E7END7	P62820;E7END7	Ras-related protein Rab-1A	RAB1A	sp|P62820|RAB1A_HUMAN Ras-related protein Rab-1A OS=Homo sapiens OX=9606 GN=RAB1A PE=1 SV=3;tr|E7END7|E7END7_HUMAN Ras-related protein Rab-1A OS=Homo sapiens OX=9606 GN=RAB1A PE=1 SV=1	2	7	3	4	3	3	6	6	5	6	7	6	1	1	1	2	2	2	2	3	3	50.7	24.4	22.677	205	205;173	0	83.55	30.7	21.5	22.9	40.5	40.5	32.7	40.5	50.7	42.9	1452100000	0	0	0	194740000	121290000	91492000	103640000
P78357;K7EMM9	P78357	Contactin-associated protein 1	CNTNAP1	sp|P78357|CNTP1_HUMAN Contactin-associated protein 1 OS=Homo sapiens OX=9606 GN=CNTNAP1 PE=1 SV=1	2	16	16	0	0	0	10	8	6	9	11	9	0	0	0	10	8	6	9	11	9	14.8	14.8	156.26	1384	1384;740	0	83.514	0	0	0	8.6	6.9	5.3	8.3	10	8.4	1397000000	0	0	0	202180000	66933000	99563000	298380000
Q9BW27;J3KT10;J3QL54;F5H0W7;J3QLD4;J3QLH0;J3KRC0;J3QLV0;J3KSH3;J3KS87;J3KTC7;J3QL91	Q9BW27;J3KT10;J3QL54	Nuclear pore complex protein Nup85	NUP85	sp|Q9BW27|NUP85_HUMAN Nuclear pore complex protein Nup85 OS=Homo sapiens OX=9606 GN=NUP85 PE=1 SV=1;tr|J3KT10|J3KT10_HUMAN Nuclear pore complex protein Nup85 OS=Homo sapiens OX=9606 GN=NUP85 PE=1 SV=1;tr|J3QL54|J3QL54_HUMAN Nuclear pore complex protein Nup	12	17	17	0	0	0	12	10	9	10	13	7	0	0	0	12	10	9	10	13	7	32	32	75.019	656	656;611;544;259;272;302;169;191;120;98;100;114	0	83.325	0	0	0	24.2	22.6	18.8	20.9	24.4	15.2	2688800000	0	0	0	468100000	312320000	202220000	446330000
A0A0U1RRB6;Q9Y2D4;J3QT38;F8W6R7	A0A0U1RRB6;Q9Y2D4;J3QT38	Exocyst complex component 6B	EXOC6B	tr|A0A0U1RRB6|A0A0U1RRB6_HUMAN Exocyst complex component OS=Homo sapiens OX=9606 GN=EXOC6B PE=1 SV=1;sp|Q9Y2D4|EXC6B_HUMAN Exocyst complex component 6B OS=Homo sapiens OX=9606 GN=EXOC6B PE=1 SV=3;tr|J3QT38|J3QT38_HUMAN Exocyst complex component OS=Homo sap	4	15	15	0	0	0	10	8	8	9	9	11	0	0	0	10	8	8	9	9	11	27.5	27.5	94.685	815	815;811;681;40	0	83.281	0	0	0	19.1	14.5	12.5	18.9	17.4	20.9	2172500000	0	0	0	322880000	286330000	231090000	440840000
P02452;I3L3H7	P02452	Collagen alpha-1(I) chain	COL1A1	sp|P02452|CO1A1_HUMAN Collagen alpha-1(I) chain OS=Homo sapiens OX=9606 GN=COL1A1 PE=1 SV=5	2	16	16	2	4	3	9	8	9	7	11	9	2	4	3	9	8	9	7	11	9	18.4	18.4	138.94	1464	1464;154	0	83.034	1.5	3.5	3.2	10	7.7	9.8	8.4	13.5	9.6	1517800000	9666900	17089000	17823000	185400000	210800000	171660000	264940000
P11413;E7EUI8;E9PD92;E7EM57	P11413;E7EUI8;E9PD92;E7EM57	Glucose-6-phosphate 1-dehydrogenase	G6PD	sp|P11413|G6PD_HUMAN Glucose-6-phosphate 1-dehydrogenase OS=Homo sapiens OX=9606 GN=G6PD PE=1 SV=4;tr|E7EUI8|E7EUI8_HUMAN Glucose-6-phosphate 1-dehydrogenase (Fragment) OS=Homo sapiens OX=9606 GN=G6PD PE=1 SV=8;tr|E9PD92|E9PD92_HUMAN Glucose-6-phosphate 1-	4	18	18	2	2	2	15	13	12	12	13	14	2	2	2	15	13	12	12	13	14	41.7	41.7	59.256	515	515;338;256;320	0	82.963	5	4.7	4.9	34.8	30.5	27.2	28.7	30.5	34.4	5836300000	11634000	4658500	13413000	834560000	824390000	573430000	1178400000
P45974;F5H571	P45974	Ubiquitin carboxyl-terminal hydrolase 5	USP5	sp|P45974|UBP5_HUMAN Ubiquitin carboxyl-terminal hydrolase 5 OS=Homo sapiens OX=9606 GN=USP5 PE=1 SV=2	2	16	16	2	1	2	11	7	10	8	10	9	2	1	2	11	7	10	8	10	9	34.6	34.6	95.785	858	858;137	0	82.818	3.1	1.7	3.6	24.2	15	22.8	19.5	21.7	20.7	2908800000	15886000	4880000	1583300	406150000	328540000	329960000	579920000
Q00325;F8VVM2;F8VZL5;F8VWR4;F8VWQ0	Q00325;F8VVM2	Phosphate carrier protein, mitochondrial	SLC25A3	sp|Q00325|MPCP_HUMAN Phosphate carrier protein, mitochondrial OS=Homo sapiens OX=9606 GN=SLC25A3 PE=1 SV=2;tr|F8VVM2|F8VVM2_HUMAN Phosphate carrier protein, mitochondrial OS=Homo sapiens OX=9606 GN=SLC25A3 PE=1 SV=1	5	11	11	1	3	1	9	8	9	8	9	9	1	3	1	9	8	9	8	9	9	30.1	30.1	40.094	362	362;324;153;154;156	0	82.631	3.3	8.3	3.3	26	23.8	25.1	23.8	26	26	32141000000	48371000	117210000	53871000	4419300000	4122600000	4419400000	6155900000
F5GZS6;J3KPF3;P08195;F5H0E2;H0YFS2;H0YFX4;F5H867;F5GZI0;F5GZR9	F5GZS6;J3KPF3;P08195	4F2 cell-surface antigen heavy chain	SLC3A2	tr|F5GZS6|F5GZS6_HUMAN 4F2 cell-surface antigen heavy chain OS=Homo sapiens OX=9606 GN=SLC3A2 PE=1 SV=1;tr|J3KPF3|J3KPF3_HUMAN 4F2 cell-surface antigen heavy chain OS=Homo sapiens OX=9606 GN=SLC3A2 PE=1 SV=1;sp|P08195|4F2_HUMAN 4F2 cell-surface antigen hea	9	19	19	0	0	0	12	8	10	12	13	13	0	0	0	12	8	10	12	13	13	38.1	38.1	64.872	599	599;631;630;145;247;122;135;175;47	0	82.422	0	0	0	29	21	23.9	28.5	28.2	30.4	5408200000	0	0	0	820020000	595150000	549010000	1135300000
Q9ULV4;B4E3S0;F8W1H8;F8VUX3;F8VSA4;F8VRE9;F8VTT6;F8VVB7;F8VV53	Q9ULV4;B4E3S0	Coronin-1C;Coronin	CORO1C	sp|Q9ULV4|COR1C_HUMAN Coronin-1C OS=Homo sapiens OX=9606 GN=CORO1C PE=1 SV=1;tr|B4E3S0|B4E3S0_HUMAN Coronin OS=Homo sapiens OX=9606 GN=CORO1C PE=1 SV=1	9	18	7	4	4	7	11	10	10	10	12	11	2	1	3	6	5	5	5	6	6	47.7	21.7	53.248	474	474;369;151;159;162;163;169;181;125	0	82.399	12.2	10.3	21.1	35.2	29.3	29.7	31.2	33.3	30.8	8584800000	103080000	33900000	129470000	1183900000	931270000	1026100000	1542600000
A0A2R8Y891;P08237;F8VZI0;F8VX13;F8VZQ1;F8VP00;H0YHB8;F8VSF7;F8VTQ3;F8VW30;F8VUB8;F8VYK8;F8VVE3	A0A2R8Y891;P08237;F8VZI0	ATP-dependent 6-phosphofructokinase, muscle type	PFKM	tr|A0A2R8Y891|A0A2R8Y891_HUMAN ATP-dependent 6-phosphofructokinase OS=Homo sapiens OX=9606 GN=PFKM PE=1 SV=1;sp|P08237|PFKAM_HUMAN ATP-dependent 6-phosphofructokinase, muscle type OS=Homo sapiens OX=9606 GN=PFKM PE=1 SV=2;tr|F8VZI0|F8VZI0_HUMAN ATP-depende	13	18	15	5	3	3	9	8	11	10	12	9	3	2	2	8	7	10	9	10	8	28.5	25.5	96.907	883	883;780;694;156;161;176;41;102;111;116;141;149;165	0	82.387	6.9	4.4	4.6	14.6	11.8	18.8	16.1	18.1	13.7	1701300000	15786000	11616000	18679000	133250000	220900000	318010000	259830000
O60506;F6UXX1	O60506	Heterogeneous nuclear ribonucleoprotein Q	SYNCRIP	sp|O60506|HNRPQ_HUMAN Heterogeneous nuclear ribonucleoprotein Q OS=Homo sapiens OX=9606 GN=SYNCRIP PE=1 SV=2	2	20	5	2	0	1	16	14	13	14	17	14	0	0	0	5	3	3	3	5	3	41.6	14.1	69.602	623	623;185	0	82.373	3.4	0	2.1	35.3	33.2	31.1	32.4	38.7	31.8	9154600000	18581000	0	10733000	1513700000	1089300000	1148800000	1826000000
P35221;G3XAM7;E5RIB1;E5RHV7;H0YBB8;E5RGY6;E5RG03;E5RJ41;E5RFM3;E5RJL0;E5RIE0;E5RJZ2;E5RIT8;E5RFG3;E5RFK9;E5RFM5;E5RJP7;E5RGD2;E5RGY7;A0A0A0MTJ6;A0A0A0MRI5	P35221;G3XAM7	Catenin alpha-1	CTNNA1	sp|P35221|CTNA1_HUMAN Catenin alpha-1 OS=Homo sapiens OX=9606 GN=CTNNA1 PE=1 SV=1;tr|G3XAM7|G3XAM7_HUMAN Catenin (Cadherin-associated protein), alpha 1, 102kDa, isoform CRA_a OS=Homo sapiens OX=9606 GN=CTNNA1 PE=1 SV=1	21	15	13	0	1	1	8	7	3	10	12	9	0	1	1	7	6	2	8	10	7	28	24.2	100.07	906	906;841;215;123;129;139;156;161;94;101;117;37;55;91;105;110;119;128;136;476;569	0	82.313	0	1.4	1.4	13.1	12.4	4.6	19.8	20.5	14.8	1720200000	0	0	4371900	237520000	213300000	112890000	461840000
Q03135;E9PCT5;C9JKI3;P56539	Q03135;E9PCT5;C9JKI3	Caveolin-1;Caveolin	CAV1	sp|Q03135|CAV1_HUMAN Caveolin-1 OS=Homo sapiens OX=9606 GN=CAV1 PE=1 SV=4;tr|E9PCT5|E9PCT5_HUMAN Caveolin OS=Homo sapiens OX=9606 GN=CAV1 PE=1 SV=1;tr|C9JKI3|C9JKI3_HUMAN Caveolin (Fragment) OS=Homo sapiens OX=9606 GN=CAV1 PE=1 SV=1	4	11	11	2	2	3	7	7	7	8	8	9	2	2	3	7	7	7	8	8	9	65.2	65.2	20.471	178	178;167;138;151	0	82.312	19.7	13.5	25.3	49.4	49.4	49.4	54.5	49.4	61.8	135400000000	24879000	31923000	77520000	20360000000	12544000000	16380000000	16335000000
Q7Z6Z7;H0Y659;A0A1B0GXC7;A0A087X146;A0A087X1S3	Q7Z6Z7	E3 ubiquitin-protein ligase HUWE1	HUWE1	sp|Q7Z6Z7|HUWE1_HUMAN E3 ubiquitin-protein ligase HUWE1 OS=Homo sapiens OX=9606 GN=HUWE1 PE=1 SV=3	5	21	21	0	1	0	7	10	6	12	15	4	0	1	0	7	10	6	12	15	4	7.8	7.8	481.89	4374	4374;1197;92;191;230	0	82.278	0	0.2	0	3	4.3	2.2	4.7	5.9	1.5	941250000	0	718640	0	107510000	152130000	29509000	310580000
P11717;S4R328	P11717	Cation-independent mannose-6-phosphate receptor	IGF2R	sp|P11717|MPRI_HUMAN Cation-independent mannose-6-phosphate receptor OS=Homo sapiens OX=9606 GN=IGF2R PE=1 SV=3	2	25	25	0	0	0	16	16	9	20	16	14	0	0	0	16	16	9	20	16	14	15.7	15.7	274.37	2491	2491;185	0	81.971	0	0	0	9.2	9.9	5.4	12.7	10.4	8.3	2861700000	0	0	0	391060000	448580000	153230000	742430000
P12268;H0Y4R1;E7ETK5	P12268;H0Y4R1	Inosine-5-monophosphate dehydrogenase 2	IMPDH2	sp|P12268|IMDH2_HUMAN Inosine-5-monophosphate dehydrogenase 2 OS=Homo sapiens OX=9606 GN=IMPDH2 PE=1 SV=2;tr|H0Y4R1|H0Y4R1_HUMAN Inosine-5-monophosphate dehydrogenase 2 (Fragment) OS=Homo sapiens OX=9606 GN=IMPDH2 PE=1 SV=1	3	17	17	4	3	6	13	9	7	13	13	11	4	3	6	13	9	7	13	13	11	43	43	55.804	514	514;470;279	0	81.604	14.2	10.5	19.5	38.5	29	22	37.4	37.2	35.4	3237600000	33259000	18877000	35617000	467100000	404470000	189800000	915900000
P02786;G3V0E5;H7C3V5;F8WBE5	P02786;G3V0E5	Transferrin receptor protein 1;Transferrin receptor protein 1, serum form	TFRC	sp|P02786|TFR1_HUMAN Transferrin receptor protein 1 OS=Homo sapiens OX=9606 GN=TFRC PE=1 SV=2;tr|G3V0E5|G3V0E5_HUMAN Transferrin receptor (P90, CD71), isoform CRA_c OS=Homo sapiens OX=9606 GN=TFRC PE=1 SV=1	4	18	18	1	1	0	15	10	8	13	13	12	1	1	0	15	10	8	13	13	12	30	30	84.87	760	760;679;118;81	0	81.208	1.8	1.8	0	24.3	17	13.2	22	22.6	20.3	4263800000	3639400	0	0	698860000	619580000	276130000	913710000
Q8N1G4	Q8N1G4	Leucine-rich repeat-containing protein 47	LRRC47	sp|Q8N1G4|LRC47_HUMAN Leucine-rich repeat-containing protein 47 OS=Homo sapiens OX=9606 GN=LRRC47 PE=1 SV=1	1	9	9	2	1	0	3	6	2	4	3	2	2	1	0	3	6	2	4	3	2	23.8	23.8	63.472	583	583	0	81.2	4.8	2.9	0	7.9	16.1	6.2	10.3	9.6	6.2	438370000	0	0	0	74886000	139080000	37819000	105030000
P22234;E9PBS1;D6RF62	P22234;E9PBS1;D6RF62	Multifunctional protein ADE2;Phosphoribosylaminoimidazole-succinocarboxamide synthase;Phosphoribosylaminoimidazole carboxylase	PAICS	sp|P22234|PUR6_HUMAN Multifunctional protein ADE2 OS=Homo sapiens OX=9606 GN=PAICS PE=1 SV=3;tr|E9PBS1|E9PBS1_HUMAN Multifunctional protein ADE2 (Fragment) OS=Homo sapiens OX=9606 GN=PAICS PE=1 SV=1;tr|D6RF62|D6RF62_HUMAN Multifunctional protein ADE2 OS=Ho	3	22	22	6	5	5	17	19	11	16	19	16	6	5	5	17	19	11	16	19	16	47.8	47.8	47.079	425	425;413;333	0	81.199	16.2	9.4	16.7	40.5	47.5	33.4	44.2	47.8	40.5	11947000000	60187000	16676000	67806000	1915000000	1960600000	698270000	2560900000
P38606;C9JA17;C9JVW8	P38606	V-type proton ATPase catalytic subunit A	ATP6V1A	sp|P38606|VATA_HUMAN V-type proton ATPase catalytic subunit A OS=Homo sapiens OX=9606 GN=ATP6V1A PE=1 SV=2	3	20	20	7	7	4	12	11	13	12	12	15	7	7	4	12	11	13	12	12	15	46	46	68.303	617	617;184;221	0	80.875	18.6	16.9	10.9	28	27.9	34.4	33.4	29.5	35.7	4217300000	63193000	32411000	26967000	595030000	445740000	1070000000	676140000
Q53GQ0;A0A1B0GV93;A0A1B0GVY6;E9PI21;A0A1B0GW85;A0A1B0GU83	Q53GQ0;A0A1B0GV93;A0A1B0GVY6	Very-long-chain 3-oxoacyl-CoA reductase	HSD17B12	sp|Q53GQ0|DHB12_HUMAN Very-long-chain 3-oxoacyl-CoA reductase OS=Homo sapiens OX=9606 GN=HSD17B12 PE=1 SV=2;tr|A0A1B0GV93|A0A1B0GV93_HUMAN Very-long-chain 3-oxoacyl-CoA reductase OS=Homo sapiens OX=9606 GN=HSD17B12 PE=1 SV=1;tr|A0A1B0GVY6|A0A1B0GVY6_HUMAN	6	11	11	0	0	0	9	8	8	8	8	10	0	0	0	9	8	8	8	8	10	43.9	43.9	34.324	312	312;276;178;164;103;111	0	80.865	0	0	0	38.5	32.4	34.9	35.3	31.1	43.3	5492400000	0	0	0	755470000	669880000	618310000	974330000
Q9H583;Q5T3Q7;Q6P664	Q9H583;Q5T3Q7	HEAT repeat-containing protein 1;HEAT repeat-containing protein 1, N-terminally processed	HEATR1	sp|Q9H583|HEAT1_HUMAN HEAT repeat-containing protein 1 OS=Homo sapiens OX=9606 GN=HEATR1 PE=1 SV=3;tr|Q5T3Q7|Q5T3Q7_HUMAN HEAT repeat-containing protein 1 OS=Homo sapiens OX=9606 GN=HEATR1 PE=1 SV=1	3	19	19	0	0	0	8	8	5	7	9	15	0	0	0	8	8	5	7	9	15	11.6	11.6	242.37	2144	2144;2063;120	0	80.735	0	0	0	4.4	4.4	3.1	4.3	4.9	10	1670800000	0	0	0	276630000	225830000	71835000	284270000
A0A1B0GTP9;A0A1B0GWF2;A0A1B0GVQ5;A0A2R8Y5D4;A0A0D9SG72;P61764;A0A1B0GW76;A0A0D9SFQ7;A0A0D9SFW6;A0A0D9SEP9;A0A0D9SEH5;A0A1B0GTD8;A0A096LP33;A0A1B0GVV9;A0A096LP52	A0A1B0GTP9;A0A1B0GWF2;A0A1B0GVQ5;A0A2R8Y5D4;A0A0D9SG72;P61764;A0A1B0GW76	Syntaxin-binding protein 1	STXBP1	tr|A0A1B0GTP9|A0A1B0GTP9_HUMAN Syntaxin-binding protein 1 OS=Homo sapiens OX=9606 GN=STXBP1 PE=1 SV=1;tr|A0A1B0GWF2|A0A1B0GWF2_HUMAN Syntaxin-binding protein 1 OS=Homo sapiens OX=9606 GN=STXBP1 PE=1 SV=1;tr|A0A1B0GVQ5|A0A1B0GVQ5_HUMAN Syntaxin-binding prot	15	23	23	6	8	9	4	4	16	2	7	15	6	8	9	4	4	16	2	7	15	48	48	67.327	589	589;574;577;580;580;594;360;147;149;100;102;55;75;112;119	0	80.637	13.2	16.6	17.5	9.7	8.7	41.9	4.2	16	36.2	2972800000	87871000	126990000	111620000	72150000	68036000	1214100000	32748000
Q93008;H7C2M9	Q93008	Probable ubiquitin carboxyl-terminal hydrolase FAF-X	USP9X	sp|Q93008|USP9X_HUMAN Probable ubiquitin carboxyl-terminal hydrolase FAF-X OS=Homo sapiens OX=9606 GN=USP9X PE=1 SV=3	2	27	15	0	0	0	14	8	8	12	14	13	0	0	0	9	3	5	8	8	8	13.7	8.4	292.28	2570	2570;237	0	80.467	0	0	0	7.6	4.5	3.8	6.6	7.4	6.3	1786800000	0	0	0	244480000	198760000	217320000	395180000
Q969Z0;H7C4R5;C9IZN7;C9J7P5;C9J5A2;C9J347	Q969Z0	Protein TBRG4	TBRG4	sp|Q969Z0|FAKD4_HUMAN FAST kinase domain-containing protein 4 OS=Homo sapiens OX=9606 GN=TBRG4 PE=1 SV=1	6	13	13	0	0	0	9	8	9	9	8	11	0	0	0	9	8	9	9	8	11	36.3	36.3	70.737	631	631;274;283;248;118;128	0	80.216	0	0	0	23	19.5	24.2	24.4	19.3	32.8	4064700000	0	0	0	642680000	561450000	421450000	790130000
Q12906;K7EKJ9;K7EQR9;K7EJ09;K7ER69;K7ERM6;K7ENK6;K7EM82;K7EKY0;K7EPG3;K7EQ75;K7ELV3	Q12906	Interleukin enhancer-binding factor 3	ILF3	sp|Q12906|ILF3_HUMAN Interleukin enhancer-binding factor 3 OS=Homo sapiens OX=9606 GN=ILF3 PE=1 SV=3	12	28	25	2	0	0	21	20	18	21	23	16	2	0	0	19	19	16	20	22	14	38.1	35	95.337	894	894;254;180;122;161;77;79;99;158;73;55;116	0	79.97	3	0	0	32.3	31.3	29.3	27.6	29.8	26.6	7361900000	23290000	0	0	1452800000	1032600000	836520000	1473700000
P05388;F8VWS0;F8VU65;F8VPE8;G3V210;F8VW21;Q8NHW5;F8VQY6;F8VRK7;F8VWV4;F8VZS0;F8VS58;F8W1K8	P05388;F8VWS0;F8VU65;F8VPE8;G3V210;F8VW21;Q8NHW5;F8VQY6;F8VRK7	60S acidic ribosomal protein P0;60S acidic ribosomal protein P0-like	RPLP0;RPLP0P6	sp|P05388|RLA0_HUMAN 60S acidic ribosomal protein P0 OS=Homo sapiens OX=9606 GN=RPLP0 PE=1 SV=1;tr|F8VWS0|F8VWS0_HUMAN 60S acidic ribosomal protein P0 OS=Homo sapiens OX=9606 GN=RPLP0 PE=1 SV=1;tr|F8VU65|F8VU65_HUMAN 60S acidic ribosomal protein P0 (Fragme	13	11	11	7	6	5	11	9	7	9	6	8	7	6	5	11	9	7	9	6	8	49.5	49.5	34.273	317	317;281;247;153;166;244;317;142;156;111;246;121;107	0	79.761	37.2	30.6	29.3	49.5	43.8	36.3	43.8	32.2	40.1	17716000000	326050000	152130000	250450000	2671100000	2829900000	1381800000	4716100000
P43034;I3L3N5;I3L495	P43034	Platelet-activating factor acetylhydrolase IB subunit alpha	PAFAH1B1	sp|P43034|LIS1_HUMAN Platelet-activating factor acetylhydrolase IB subunit alpha OS=Homo sapiens OX=9606 GN=PAFAH1B1 PE=1 SV=2	3	11	11	1	0	1	4	5	5	6	7	9	1	0	1	4	5	5	6	7	9	37.8	37.8	46.637	410	410;208;82	0	79.632	2.7	0	2.7	10.5	17.8	19	22	29	36.1	1808900000	6100200	0	11897000	128680000	245680000	110980000	581620000
Q9BW60	Q9BW60	Elongation of very long chain fatty acids protein 1	ELOVL1	sp|Q9BW60|ELOV1_HUMAN Elongation of very long chain fatty acids protein 1 OS=Homo sapiens OX=9606 GN=ELOVL1 PE=1 SV=1	1	3	3	0	0	0	3	1	1	2	2	1	0	0	0	3	1	1	2	2	1	14	14	32.662	279	279	0	79.586	0	0	0	14	5	5	9.7	9.7	5	475590000	0	0	0	23602000	77552000	55627000	119370000
Q27J81;A0A0A0MQU1	Q27J81;A0A0A0MQU1	Inverted formin-2	INF2	sp|Q27J81|INF2_HUMAN Inverted formin-2 OS=Homo sapiens OX=9606 GN=INF2 PE=1 SV=2;tr|A0A0A0MQU1|A0A0A0MQU1_HUMAN Inverted formin-2 (Fragment) OS=Homo sapiens OX=9606 GN=INF2 PE=1 SV=1	2	17	17	0	0	0	11	6	3	7	11	7	0	0	0	11	6	3	7	11	7	26.4	26.4	135.62	1249	1249;717	0	79.565	0	0	0	17.4	8	3.9	9.4	17.1	9.5	1119000000	0	0	0	249560000	149900000	188100000	153640000
Q9UI26;F8WDV0;D6RJB1;D6RCN7;E7EMB7;H0Y8M5	Q9UI26;F8WDV0	Importin-11	IPO11	sp|Q9UI26|IPO11_HUMAN Importin-11 OS=Homo sapiens OX=9606 GN=IPO11 PE=1 SV=1;tr|F8WDV0|F8WDV0_HUMAN Importin-11 OS=Homo sapiens OX=9606 GN=IPO11 PE=1 SV=1	6	12	12	0	0	0	9	6	9	8	9	9	0	0	0	9	6	9	8	9	9	15.7	15.7	112.53	975	975;863;162;148;94;160	0	79.543	0	0	0	12.8	8.5	12.8	12.7	11.9	12.9	6180000000	0	0	0	815400000	724540000	631180000	1215300000
A0A0C4DGH0;Q5ZPR3;H0YK40;H0YK59;H0YL10;H0YLT8;H0YN85	A0A0C4DGH0;Q5ZPR3;H0YK40;H0YK59;H0YL10	CD276 antigen	CD276	tr|A0A0C4DGH0|A0A0C4DGH0_HUMAN CD276 antigen OS=Homo sapiens OX=9606 GN=CD276 PE=1 SV=1;sp|Q5ZPR3|CD276_HUMAN CD276 antigen OS=Homo sapiens OX=9606 GN=CD276 PE=1 SV=1;tr|H0YK40|H0YK40_HUMAN CD276 antigen (Fragment) OS=Homo sapiens OX=9606 GN=CD276 PE=1 SV=	7	4	4	1	0	0	3	3	2	4	3	4	1	0	0	3	3	2	4	3	4	21.6	21.6	41.767	388	388;534;156;165;199;132;136	0	79.294	6.7	0	0	14.9	17	10.3	21.6	17	21.6	963900000	3526500	0	0	152920000	95698000	46765000	272510000
Q9UP83	Q9UP83	Conserved oligomeric Golgi complex subunit 5	COG5	sp|Q9UP83|COG5_HUMAN Conserved oligomeric Golgi complex subunit 5 OS=Homo sapiens OX=9606 GN=COG5 PE=1 SV=3	1	15	12	0	0	0	10	8	6	12	9	8	0	0	0	7	6	4	9	6	5	24.1	18.5	92.742	839	839	0	78.733	0	0	0	16.7	13.5	9.5	19.8	16.2	15.1	2698800000	0	0	0	479060000	348870000	291320000	717850000
O94804	O94804	Serine/threonine-protein kinase 10	STK10	sp|O94804|STK10_HUMAN Serine/threonine-protein kinase 10 OS=Homo sapiens OX=9606 GN=STK10 PE=1 SV=1	1	10	10	0	0	0	0	1	1	6	8	7	0	0	0	0	1	1	6	8	7	17.5	17.5	112.13	968	968	0	78.698	0	0	0	0	1.5	1.5	9	13.4	11.6	953930000	0	0	0	0	4076300	4862500	266070000
E9PKG1;Q99873;E9PIX6;E9PQ98;H0YDE4;E9PNR9;E9PMW9;Q9NR22	E9PKG1;Q99873;E9PIX6;E9PQ98;H0YDE4	Protein arginine N-methyltransferase 1	PRMT1	tr|E9PKG1|E9PKG1_HUMAN Protein arginine N-methyltransferase 1 OS=Homo sapiens OX=9606 GN=PRMT1 PE=1 SV=1;sp|Q99873|ANM1_HUMAN Protein arginine N-methyltransferase 1 OS=Homo sapiens OX=9606 GN=PRMT1 PE=1 SV=3;tr|E9PIX6|E9PIX6_HUMAN Protein arginine N-methyl	8	19	19	2	5	6	16	13	15	14	16	15	2	5	6	16	13	15	14	16	15	66.2	66.2	37.709	325	325;371;207;205;238;160;110;394	0	78.444	9.5	20.9	26.2	54.2	51.1	53.2	51.7	57.8	60.6	10338000000	26128000	39427000	71129000	1733000000	1194800000	1164300000	1954200000
Q96K37;H7C1I0	Q96K37;H7C1I0	Solute carrier family 35 member E1	SLC35E1	sp|Q96K37|S35E1_HUMAN Solute carrier family 35 member E1 OS=Homo sapiens OX=9606 GN=SLC35E1 PE=1 SV=2;tr|H7C1I0|H7C1I0_HUMAN Solute carrier family 35 member E1 (Fragment) OS=Homo sapiens OX=9606 GN=SLC35E1 PE=1 SV=2	2	4	4	0	0	0	1	3	3	3	4	2	0	0	0	1	3	3	3	4	2	17.6	17.6	44.772	410	410;344	0	78.364	0	0	0	5.9	14.6	14.6	14.6	17.6	12	793270000	0	0	0	69525000	84447000	118060000	186140000
P21964;E7EMS6;E7EUU8;H7BZ45;F8WBW9	P21964;E7EMS6;E7EUU8	Catechol O-methyltransferase	COMT	sp|P21964|COMT_HUMAN Catechol O-methyltransferase OS=Homo sapiens OX=9606 GN=COMT PE=1 SV=2;tr|E7EMS6|E7EMS6_HUMAN Catechol O-methyltransferase (Fragment) OS=Homo sapiens OX=9606 GN=COMT PE=1 SV=1;tr|E7EUU8|E7EUU8_HUMAN Catechol O-methyltransferase OS=Homo	5	10	10	1	1	2	9	7	8	7	9	9	1	1	2	9	7	8	7	9	9	57.2	57.2	30.037	271	271;223;235;152;199	0	78.256	5.9	5.9	11.8	51.3	46.5	46.9	46.5	51.3	52.8	6201000000	0	0	17712000	760720000	571000000	654020000	1265700000
A0A087WYS1;E7EUC7;Q16851;C9JVG3;C9JQU9;C9JNZ1;C9JWG0;C9JTZ5;C9JUW1;C9J6Q0;F2Z3H1;C9J3M0;F2Z3P4;F8WC70	A0A087WYS1;E7EUC7;Q16851	UTP--glucose-1-phosphate uridylyltransferase	UGP2	tr|A0A087WYS1|A0A087WYS1_HUMAN UTP--glucose-1-phosphate uridylyltransferase OS=Homo sapiens OX=9606 GN=UGP2 PE=1 SV=1;tr|E7EUC7|E7EUC7_HUMAN UTP--glucose-1-phosphate uridylyltransferase OS=Homo sapiens OX=9606 GN=UGP2 PE=1 SV=1;sp|Q16851|UGPA_HUMAN UTP--gl	14	13	13	1	0	1	7	6	5	9	7	10	1	0	1	7	6	5	9	7	10	38	38	56.967	508	508;517;508;170;175;212;150;104;135;49;76;38;48;52	0	78.212	3.9	0	3.9	21.7	18.3	16.9	27.2	22.6	30.7	2750600000	6198300	0	7358600	315560000	406330000	204190000	619080000
P28074;H0YJM8	P28074	Proteasome subunit beta type-5	PSMB5	sp|P28074|PSB5_HUMAN Proteasome subunit beta type-5 OS=Homo sapiens OX=9606 GN=PSMB5 PE=1 SV=3	2	9	9	4	4	1	7	7	5	6	7	6	4	4	1	7	7	5	6	7	6	38.4	38.4	28.48	263	263;118	0	78.011	19.8	19.8	4.9	33.5	33.5	29.3	33.1	33.5	33.1	3617000000	26664000	39238000	16690000	534860000	559900000	284720000	714640000
P68036;A0A1B0GUS4	P68036	Ubiquitin-conjugating enzyme E2 L3	UBE2L3	sp|P68036|UB2L3_HUMAN Ubiquitin-conjugating enzyme E2 L3 OS=Homo sapiens OX=9606 GN=UBE2L3 PE=1 SV=1	2	7	7	3	1	1	4	3	5	3	3	5	3	1	1	4	3	5	3	3	5	59.1	59.1	17.861	154	154;154	0	77.884	27.9	5.8	5.8	46.1	40.3	47.4	40.3	40.3	47.4	11824000000	6166700	2004500	1919800	1878600000	1395700000	1833000000	1509100000
Q13885	Q13885	Tubulin beta-2A chain	TUBB2A	sp|Q13885|TBB2A_HUMAN Tubulin beta-2A chain OS=Homo sapiens OX=9606 GN=TUBB2A PE=1 SV=1	1	29	2	18	17	17	26	26	28	26	27	28	2	2	2	2	2	2	2	2	2	78.7	11.5	49.906	445	445	0	77.736	58.4	58.4	54.4	76.9	76.6	78.7	70.8	78.7	78.7	80251000000	590850000	713340000	468450000	11817000000	11441000000	12340000000	14495000000
P00367;P49448	P00367;P49448	Glutamate dehydrogenase 1, mitochondrial;Glutamate dehydrogenase 2, mitochondrial	GLUD1;GLUD2	sp|P00367|DHE3_HUMAN Glutamate dehydrogenase 1, mitochondrial OS=Homo sapiens OX=9606 GN=GLUD1 PE=1 SV=2;sp|P49448|DHE4_HUMAN Glutamate dehydrogenase 2, mitochondrial OS=Homo sapiens OX=9606 GN=GLUD2 PE=1 SV=2	2	21	21	3	5	3	13	9	13	9	9	13	3	5	3	13	9	13	9	9	13	45.9	45.9	61.397	558	558;558	0	77.7	7.2	11.5	5.7	29.4	23.1	25.1	21.9	23.8	31.4	4777100000	29287000	70749000	35427000	658170000	450850000	1233100000	483320000
Q96QD8;F8VUY8	Q96QD8;F8VUY8	Sodium-coupled neutral amino acid transporter 2	SLC38A2	sp|Q96QD8|S38A2_HUMAN Sodium-coupled neutral amino acid transporter 2 OS=Homo sapiens OX=9606 GN=SLC38A2 PE=1 SV=2;tr|F8VUY8|F8VUY8_HUMAN Sodium-coupled neutral amino acid transporter 2 OS=Homo sapiens OX=9606 GN=SLC38A2 PE=1 SV=1	2	4	4	0	2	1	4	3	3	3	3	3	0	2	1	4	3	3	3	3	3	12.5	12.5	56.025	506	506;88	0	77.697	0	7.3	3.2	12.5	7.5	7.5	7.5	7.5	7.5	3721500000	0	6222500	0	705570000	460070000	418390000	691180000
Q14669;H7C2Y1;H7C1L9;G5E9G6	Q14669	E3 ubiquitin-protein ligase TRIP12	TRIP12	sp|Q14669|TRIPC_HUMAN E3 ubiquitin-protein ligase TRIP12 OS=Homo sapiens OX=9606 GN=TRIP12 PE=1 SV=1	4	14	14	0	1	0	9	4	2	7	6	5	0	1	0	9	4	2	7	6	5	10.8	10.8	220.43	1992	1992;187;217;430	0	77.647	0	0.5	0	7.3	3.6	1.8	6.1	4.6	3.8	1280700000	0	5176500	0	243880000	53751000	126180000	469040000
P37268;E9PNM1;A0A1W2PQ47;E9PJG4;E9PS69	P37268;E9PNM1;A0A1W2PQ47	Squalene synthase	FDFT1	sp|P37268|FDFT_HUMAN Squalene synthase OS=Homo sapiens OX=9606 GN=FDFT1 PE=1 SV=1;tr|E9PNM1|E9PNM1_HUMAN Squalene synthase OS=Homo sapiens OX=9606 GN=FDFT1 PE=1 SV=1;tr|A0A1W2PQ47|A0A1W2PQ47_HUMAN Squalene synthase OS=Homo sapiens OX=9606 GN=FDFT1 PE=1 SV=	5	11	11	0	0	0	7	6	7	6	8	10	0	0	0	7	6	7	6	8	10	35.3	35.3	48.115	417	417;410;476;150;113	0	77.595	0	0	0	23.3	20.1	23.3	20.1	25.7	32.9	3753500000	0	0	0	410240000	457020000	350700000	802590000
Q16537	Q16537	Serine/threonine-protein phosphatase 2A 56 kDa regulatory subunit epsilon isoform	PPP2R5E	sp|Q16537|2A5E_HUMAN Serine/threonine-protein phosphatase 2A 56 kDa regulatory subunit epsilon isoform OS=Homo sapiens OX=9606 GN=PPP2R5E PE=1 SV=1	1	10	7	0	0	0	9	9	8	8	9	8	0	0	0	7	7	7	7	7	6	26.1	20.3	54.699	467	467	0	77.577	0	0	0	24.6	24.4	22.9	22.9	24.4	21.8	2436700000	0	0	0	321020000	400560000	339140000	409150000
Q96P63	Q96P63	Serpin B12	SERPINB12	sp|Q96P63|SPB12_HUMAN Serpin B12 OS=Homo sapiens OX=9606 GN=SERPINB12 PE=1 SV=1	1	11	11	7	4	6	4	2	1	2	3	10	7	4	6	4	2	1	2	3	10	36.8	36.8	46.276	405	405	0	77.443	21.2	15.1	21.2	10.1	6.2	2.2	7.9	11.9	34.3	1240000000	175570000	57151000	290030000	104050000	42568000	16940000	21690000
O00232;J3KTJ5;J3KSK1	O00232	26S proteasome non-ATPase regulatory subunit 12	PSMD12	sp|O00232|PSD12_HUMAN 26S proteasome non-ATPase regulatory subunit 12 OS=Homo sapiens OX=9606 GN=PSMD12 PE=1 SV=3	3	12	12	1	1	2	10	8	10	11	11	6	1	1	2	10	8	10	11	11	6	29.8	29.8	52.904	456	456;38;42	0	77.064	3.1	3.1	5.3	25.4	22.1	24.3	26.8	28.5	18.6	2575100000	2821700	1829400	13785000	366510000	262050000	342340000	685850000
E7EUY3;E9PDR0;E7EX59;P05166;E7ETT4;E7ETT1;C9JQS9;E9PEC3;F8WBI9;E7ENC1;H7C5C9;C9JAW3;C9JVW9;C9JVY9	E7EUY3;E9PDR0;E7EX59;P05166;E7ETT4;E7ETT1;C9JQS9;E9PEC3;F8WBI9	Propionyl-CoA carboxylase beta chain, mitochondrial	PCCB	tr|E7EUY3|E7EUY3_HUMAN Propionyl-CoA carboxylase beta chain, mitochondrial OS=Homo sapiens OX=9606 GN=PCCB PE=1 SV=1;tr|E9PDR0|E9PDR0_HUMAN Propionyl-CoA carboxylase beta chain, mitochondrial OS=Homo sapiens OX=9606 GN=PCCB PE=1 SV=1;tr|E7EX59|E7EX59_HUMAN	14	11	11	10	7	6	6	8	6	5	5	5	10	7	6	6	8	6	5	5	5	32.4	32.4	55.708	516	516;550;570;539;482;520;559;423;405;303;163;84;133;191	0	76.994	30	18.8	18.2	16.9	23.6	17.2	14.7	14.3	14.7	1148200000	131490000	88886000	95709000	144390000	129760000	78540000	163130000
P61981	P61981	14-3-3 protein gamma;14-3-3 protein gamma, N-terminally processed	YWHAG	sp|P61981|1433G_HUMAN 14-3-3 protein gamma OS=Homo sapiens OX=9606 GN=YWHAG PE=1 SV=2	1	13	9	6	7	5	8	7	8	7	10	8	5	5	5	5	4	6	5	7	6	62.8	49	28.302	247	247	0	76.449	30	33.6	29.1	42.9	34.8	43.7	33.2	54.3	54.3	6261400000	141760000	118380000	222840000	884310000	595770000	1257500000	947620000
P30050	P30050	60S ribosomal protein L12	RPL12	sp|P30050|RL12_HUMAN 60S ribosomal protein L12 OS=Homo sapiens OX=9606 GN=RPL12 PE=1 SV=1	1	6	6	4	5	5	6	6	6	6	6	6	4	5	5	6	6	6	6	6	6	54.5	54.5	17.818	165	165	0	76.287	35.8	45.5	45.5	54.5	54.5	54.5	54.5	54.5	54.5	12514000000	131930000	113100000	166310000	1848100000	1587100000	1408100000	2697900000
Q96AC1;H0YJ34;A0A0U1RRM8;G3V3J0;H0YJB6;G3V281;G3V379;G3V5R2;G3V1L6	Q96AC1;H0YJ34;A0A0U1RRM8	Fermitin family homolog 2	FERMT2	sp|Q96AC1|FERM2_HUMAN Fermitin family homolog 2 OS=Homo sapiens OX=9606 GN=FERMT2 PE=1 SV=1;tr|H0YJ34|H0YJ34_HUMAN Fermitin family homolog 2 (Fragment) OS=Homo sapiens OX=9606 GN=FERMT2 PE=1 SV=1;tr|A0A0U1RRM8|A0A0U1RRM8_HUMAN Fermitin family homolog 2 (Fr	9	14	13	2	3	0	9	7	6	10	10	8	2	3	0	8	7	6	10	10	8	32.2	30.7	77.86	680	680;640;545;155;133;153;65;133;420	0	76.262	4.6	7.5	0	23.2	18.7	17.5	24.7	24.7	20.7	2520400000	17129000	4882500	0	342850000	343390000	194260000	587860000
P28066	P28066	Proteasome subunit alpha type-5	PSMA5	sp|P28066|PSA5_HUMAN Proteasome subunit alpha type-5 OS=Homo sapiens OX=9606 GN=PSMA5 PE=1 SV=3	1	7	7	2	2	1	5	3	4	5	5	3	2	2	1	5	3	4	5	5	3	51.9	51.9	26.411	241	241	0	76.061	12.9	10.4	5	37.8	21.2	29.5	37.8	39	21.6	2005300000	7043500	6819600	10664000	355650000	279350000	305870000	432180000
Q9Y6Y8;A0A0C4DH82;H7C0V8;H7C4C4	Q9Y6Y8	SEC23-interacting protein	SEC23IP	sp|Q9Y6Y8|S23IP_HUMAN SEC23-interacting protein OS=Homo sapiens OX=9606 GN=SEC23IP PE=1 SV=1	4	17	17	0	0	0	8	9	9	8	11	12	0	0	0	8	9	9	8	11	12	25.7	25.7	111.08	1000	1000;486;194;153	0	75.959	0	0	0	11.3	12.4	13.9	11.9	14.5	19.8	2442600000	0	0	0	310870000	318910000	290250000	377490000
Q9BWF3;E9PB51;D6R9K7;E9PLB0;E9PM61;U3KQD5;Q9BQ04	Q9BWF3;E9PB51;D6R9K7;E9PLB0;E9PM61;U3KQD5;Q9BQ04	RNA-binding protein 4;RNA-binding protein 4B	RBM4;RBM4B	sp|Q9BWF3|RBM4_HUMAN RNA-binding protein 4 OS=Homo sapiens OX=9606 GN=RBM4 PE=1 SV=1;tr|E9PB51|E9PB51_HUMAN RNA-binding protein 4 (Fragment) OS=Homo sapiens OX=9606 GN=RBM4 PE=1 SV=1;tr|D6R9K7|D6R9K7_HUMAN RNA-binding protein 4 OS=Homo sapiens OX=9606 GN=R	7	9	3	0	1	0	4	4	5	6	5	5	0	1	0	2	2	2	3	2	2	37.1	20.9	40.313	364	364;240;150;143;147;151;359	0	75.898	0	4.4	0	16.5	17.9	21.2	29.1	20.3	20.3	1205700000	0	0	0	162170000	147440000	128780000	273990000
Q70CQ2	Q70CQ2	Ubiquitin carboxyl-terminal hydrolase 34	USP34	sp|Q70CQ2|UBP34_HUMAN Ubiquitin carboxyl-terminal hydrolase 34 OS=Homo sapiens OX=9606 GN=USP34 PE=1 SV=2	1	3	3	0	0	0	0	2	0	1	1	2	0	0	0	0	2	0	1	1	2	1.2	1.2	404.23	3546	3546	0	75.841	0	0	0	0	0.9	0	0.5	0.5	0.8	53768000	0	0	0	0	5866200	0	16372000
Q9UMS4;F5GY56;H0YGF3;F5H2I0;H0YGZ5	Q9UMS4	Pre-mRNA-processing factor 19	PRPF19	sp|Q9UMS4|PRP19_HUMAN Pre-mRNA-processing factor 19 OS=Homo sapiens OX=9606 GN=PRPF19 PE=1 SV=1	5	13	13	0	0	0	9	8	11	10	9	10	0	0	0	9	8	11	10	9	10	51.6	51.6	55.18	504	504;252;45;104;119	0	75.71	0	0	0	31.9	28.8	46	37.5	35.9	39.9	2944100000	0	0	0	412220000	289420000	357790000	677820000
P09382;F8WEI7	P09382	Galectin-1	LGALS1	sp|P09382|LEG1_HUMAN Galectin-1 OS=Homo sapiens OX=9606 GN=LGALS1 PE=1 SV=2	2	6	6	3	3	5	5	5	4	5	5	6	3	3	5	5	5	4	5	5	6	57	57	14.716	135	135;38	0	75.378	31.9	31.9	51.1	51.1	51.1	45.2	51.1	51.1	57	10346000000	188030000	135200000	264780000	1071600000	1469400000	895580000	1911600000
Q5T5C7;P49591	Q5T5C7;P49591	Serine--tRNA ligase, cytoplasmic	SARS	tr|Q5T5C7|Q5T5C7_HUMAN Seryl-tRNA synthetase 1 OS=Homo sapiens OX=9606 GN=SARS1 PE=1 SV=1;sp|P49591|SYSC_HUMAN Serine--tRNA ligase, cytoplasmic OS=Homo sapiens OX=9606 GN=SARS1 PE=1 SV=3	2	14	14	2	3	2	10	9	7	9	5	5	2	3	2	10	9	7	9	5	5	38.6	38.6	61.312	536	536;514	0	75.059	7.1	7.1	5	28.7	24.3	19.8	25.4	13.4	16.2	2502100000	8782600	7012800	0	580200000	425850000	286450000	528730000
P07737;K7EJ44;I3L3D5	P07737;K7EJ44	Profilin-1	PFN1	sp|P07737|PROF1_HUMAN Profilin-1 OS=Homo sapiens OX=9606 GN=PFN1 PE=1 SV=2;tr|K7EJ44|K7EJ44_HUMAN Profilin OS=Homo sapiens OX=9606 GN=PFN1 PE=1 SV=1	3	12	12	8	8	9	10	10	10	10	10	11	8	8	9	10	10	10	10	10	11	85	85	15.054	140	140;104;165	0	74.958	75.7	82.1	83.6	77.1	83.6	82.1	77.1	77.1	83.6	89380000000	1355700000	1067800000	1588600000	13169000000	13324000000	9496600000	18332000000
Q14566	Q14566	DNA replication licensing factor MCM6	MCM6	sp|Q14566|MCM6_HUMAN DNA replication licensing factor MCM6 OS=Homo sapiens OX=9606 GN=MCM6 PE=1 SV=1	1	17	17	1	0	1	9	11	7	8	8	8	1	0	1	9	11	7	8	8	8	27.3	27.3	92.888	821	821	0	74.516	1.2	0	1.6	17.1	16	12.1	16	15.6	14.1	1516500000	10048000	0	1749900	257580000	294220000	88245000	333860000
J3QR09;J3KTE4;P84098	J3QR09;J3KTE4;P84098	Ribosomal protein L19;60S ribosomal protein L19	RPL19	tr|J3QR09|J3QR09_HUMAN Ribosomal protein L19 OS=Homo sapiens OX=9606 GN=RPL19 PE=1 SV=1;tr|J3KTE4|J3KTE4_HUMAN Ribosomal protein L19 OS=Homo sapiens OX=9606 GN=RPL19 PE=1 SV=1;sp|P84098|RL19_HUMAN 60S ribosomal protein L19 OS=Homo sapiens OX=9606 GN=RPL19	3	4	4	3	3	2	2	2	3	2	2	3	3	3	2	2	2	3	2	2	3	18.1	18.1	23.134	193	193;194;196	0	74.384	13.5	18.1	9.3	9.3	9.3	14	9.3	9.3	14	5371800000	283360000	58343000	253720000	800130000	671750000	505510000	943270000
P35232;C9JW96;C9JZ20;E7ESE2;E9PCW0;D6RBK0	P35232;C9JW96;C9JZ20;E7ESE2;E9PCW0	Prohibitin	PHB	sp|P35232|PHB_HUMAN Prohibitin OS=Homo sapiens OX=9606 GN=PHB PE=1 SV=1;tr|C9JW96|C9JW96_HUMAN Prohibitin (Fragment) OS=Homo sapiens OX=9606 GN=PHB PE=1 SV=2;tr|C9JZ20|C9JZ20_HUMAN Prohibitin (Fragment) OS=Homo sapiens OX=9606 GN=PHB PE=1 SV=1;tr|E7ESE2|E7	6	11	11	3	4	2	8	6	6	7	7	7	3	4	2	8	6	6	7	7	7	57	57	29.804	272	272;246;201;202;216;124	0	74.356	14.3	17.3	9.9	39	31.2	29	34.6	33.8	39.7	2930400000	28774000	37977000	17687000	458660000	300070000	271590000	649720000
P63010;A0A087X253;A0A087WU93;A0A087WZQ6;A0A087WYD1;K7EJ01;K7EN71;K7ERB2;K7EJX1;H7C034	P63010;A0A087X253;A0A087WU93;A0A087WZQ6;A0A087WYD1	AP-2 complex subunit beta	AP2B1	sp|P63010|AP2B1_HUMAN AP-2 complex subunit beta OS=Homo sapiens OX=9606 GN=AP2B1 PE=1 SV=1;tr|A0A087X253|A0A087X253_HUMAN AP complex subunit beta OS=Homo sapiens OX=9606 GN=AP2B1 PE=1 SV=1;tr|A0A087WU93|A0A087WU93_HUMAN AP-2 complex subunit beta (Fragment)	10	25	14	3	2	3	16	14	13	15	15	15	1	2	2	8	9	6	8	8	7	33.8	20.5	104.55	937	937;913;663;677;639;164;132;151;80;173	0	74.203	3.8	2.2	4.8	23.9	20.8	19	21	21.8	22.2	4999400000	41025000	25881000	20161000	729270000	525150000	765260000	1072400000
E9PLK3;P55786;A6NEC2;H0YDG0;E9PP11;H0YCQ5;E9PJ74;E9PRQ5;E9PJY4;E9PPD4	E9PLK3;P55786	Puromycin-sensitive aminopeptidase	NPEPPS	tr|E9PLK3|E9PLK3_HUMAN Aminopeptidase OS=Homo sapiens OX=9606 GN=NPEPPS PE=1 SV=1;sp|P55786|PSA_HUMAN Puromycin-sensitive aminopeptidase OS=Homo sapiens OX=9606 GN=NPEPPS PE=1 SV=2	10	24	24	4	1	0	13	12	15	19	20	16	4	1	0	13	12	15	19	20	16	34.6	34.6	102.99	915	915;919;478;169;201;65;158;172;141;163	0	74.169	4.8	1.1	0	17.9	16.8	23	27.8	29.9	25	5193800000	34312000	4754300	0	553480000	595720000	733010000	1396900000
P62318;H3BT13	P62318;H3BT13	Small nuclear ribonucleoprotein Sm D3	SNRPD3	sp|P62318|SMD3_HUMAN Small nuclear ribonucleoprotein Sm D3 OS=Homo sapiens OX=9606 GN=SNRPD3 PE=1 SV=1;tr|H3BT13|H3BT13_HUMAN Small nuclear ribonucleoprotein Sm D3 OS=Homo sapiens OX=9606 GN=SNRPD3 PE=1 SV=1	2	4	4	2	1	2	4	3	3	3	3	3	2	1	2	4	3	3	3	3	3	47.6	47.6	13.916	126	126;62	0	74.152	24.6	7.9	24.6	47.6	40.5	40.5	40.5	40.5	40.5	1352800000	16881000	9793100	14161000	178690000	175230000	141320000	278820000
Q9NRY5;E7ESJ7;E5RGF9;E5RHI8;E5RFK2;E5RK42;E5RHP2;E5RH43	Q9NRY5;E7ESJ7	Protein FAM114A2	FAM114A2	sp|Q9NRY5|F1142_HUMAN Protein FAM114A2 OS=Homo sapiens OX=9606 GN=FAM114A2 PE=1 SV=4;tr|E7ESJ7|E7ESJ7_HUMAN Protein FAM114A2 OS=Homo sapiens OX=9606 GN=FAM114A2 PE=1 SV=1	8	17	17	0	0	0	12	10	9	10	12	9	0	0	0	12	10	9	10	12	9	42.8	42.8	55.468	505	505;435;210;125;166;79;103;63	0	73.992	0	0	0	30.5	31.3	30.1	30.1	33.7	26.7	3941400000	0	0	0	537530000	552130000	452090000	911710000
P62701	P62701	40S ribosomal protein S4, X isoform	RPS4X	sp|P62701|RS4X_HUMAN 40S ribosomal protein S4, X isoform OS=Homo sapiens OX=9606 GN=RPS4X PE=1 SV=2	1	19	9	10	6	9	16	14	13	12	16	12	5	2	4	8	7	8	7	8	8	58.2	35	29.597	263	263	0	73.867	41.1	23.6	37.3	55.9	51.3	47.1	42.6	53.6	47.1	20245000000	317340000	160930000	318020000	3312000000	3189700000	2276000000	3281200000
P31939;H7C1S2;C9JLK0;F8WEF0	P31939	Bifunctional purine biosynthesis protein PURH;Phosphoribosylaminoimidazolecarboxamide formyltransferase;IMP cyclohydrolase	ATIC	sp|P31939|PUR9_HUMAN Bifunctional purine biosynthesis protein PURH OS=Homo sapiens OX=9606 GN=ATIC PE=1 SV=3	4	23	23	4	3	3	16	12	8	16	12	13	4	3	3	16	12	8	16	12	13	53.2	53.2	64.615	592	592;231;170;84	0	73.297	12.5	7.9	9.5	40.5	30.2	22.3	37.2	30.2	37.2	5311100000	16893000	23385000	34125000	1090600000	554130000	408180000	1228900000
P48735;H0YL11	P48735	Isocitrate dehydrogenase [NADP], mitochondrial	IDH2	sp|P48735|IDHP_HUMAN Isocitrate dehydrogenase [NADP], mitochondrial OS=Homo sapiens OX=9606 GN=IDH2 PE=1 SV=2	2	15	15	2	2	1	13	8	9	7	10	11	2	2	1	13	8	9	7	10	11	43.8	43.8	50.909	452	452;312	0	73.084	5.3	6.6	2.9	37.6	23.5	28.8	22.8	28.8	28.5	3251100000	15902000	11901000	6239100	457560000	514420000	286070000	543950000
J3QQ67;Q07020;G3V203;H0YHA7;F8VYV2;F8VUA6;A0A075B7A0;F8VXR6	J3QQ67;Q07020;G3V203;H0YHA7;F8VYV2;F8VUA6;A0A075B7A0	60S ribosomal protein L18	RPL18	tr|J3QQ67|J3QQ67_HUMAN 60S ribosomal protein L18 (Fragment) OS=Homo sapiens OX=9606 GN=RPL18 PE=1 SV=1;sp|Q07020|RL18_HUMAN 60S ribosomal protein L18 OS=Homo sapiens OX=9606 GN=RPL18 PE=1 SV=2;tr|G3V203|G3V203_HUMAN 60S ribosomal protein L18 OS=Homo sapien	8	8	8	5	7	6	7	7	6	6	7	6	5	7	6	7	7	6	6	7	6	42.1	42.1	21.728	190	190;188;164;167;133;130;138;84	0	73.072	31.1	34.7	31.1	38.4	38.4	31.1	33.2	38.4	31.1	48818000000	2695300000	2931400000	3016900000	7525100000	6041300000	4838200000	7767900000
Q9BSJ2;F2Z2B9;B3KTU7;R4GMM4	Q9BSJ2;F2Z2B9	Gamma-tubulin complex component 2	TUBGCP2	sp|Q9BSJ2|GCP2_HUMAN Gamma-tubulin complex component 2 OS=Homo sapiens OX=9606 GN=TUBGCP2 PE=1 SV=2;tr|F2Z2B9|F2Z2B9_HUMAN Gamma-tubulin complex component OS=Homo sapiens OX=9606 GN=TUBGCP2 PE=1 SV=1	4	18	18	0	0	0	12	9	6	10	13	9	0	0	0	12	9	6	10	13	9	29.4	29.4	102.53	902	902;721;495;78	0	73.015	0	0	0	21.6	16.4	9.3	17.2	23.6	15.3	1803400000	0	0	0	285930000	264080000	142360000	408570000
Q9P2J5;A0A087WXY1	Q9P2J5	Leucine--tRNA ligase, cytoplasmic	LARS	sp|Q9P2J5|SYLC_HUMAN Leucine--tRNA ligase, cytoplasmic OS=Homo sapiens OX=9606 GN=LARS1 PE=1 SV=2	2	30	30	1	1	0	23	14	12	20	19	17	1	1	0	23	14	12	20	19	17	37.2	37.2	134.46	1176	1176;160	0	72.946	1.7	1.7	0	28.3	15.8	13.9	23.2	23.2	18.6	4324300000	3250600	3379600	0	807750000	562760000	308070000	850220000
Q6PGP7;D6RCE2;H0Y964	Q6PGP7;D6RCE2	Tetratricopeptide repeat protein 37	TTC37	sp|Q6PGP7|TTC37_HUMAN Tetratricopeptide repeat protein 37 OS=Homo sapiens OX=9606 GN=TTC37 PE=1 SV=1;tr|D6RCE2|D6RCE2_HUMAN Tetratricopeptide repeat protein 37 (Fragment) OS=Homo sapiens OX=9606 GN=TTC37 PE=1 SV=1	3	23	23	0	0	0	13	10	8	15	15	13	0	0	0	13	10	8	15	15	13	20	20	175.48	1564	1564;611;130	0	72.819	0	0	0	10.7	8.8	6.1	13.5	13.4	12	2929800000	0	0	0	333280000	365050000	181790000	668720000
P31948;F5H783;F5GXD8;H0YGI8	P31948	Stress-induced-phosphoprotein 1	STIP1	sp|P31948|STIP1_HUMAN Stress-induced-phosphoprotein 1 OS=Homo sapiens OX=9606 GN=STIP1 PE=1 SV=1	4	25	25	4	5	4	18	18	18	15	15	13	4	5	4	18	18	18	15	15	13	49.7	49.7	62.639	543	543;236;138;137	0	72.735	8.3	11.2	10.5	38.3	38.5	35.9	33.1	32.6	29.8	6904200000	35301000	27538000	31343000	1013800000	1116100000	1122000000	1348700000
P47897;A0A1B0GVU9;B4DDN1;H7C0R3;A0A0U1RQX5;C9J165;A0A0U1RRC8;A0A0U1RQT0;A0A1B0GTT3;A0A0U1RQQ5;A0A0U1RQX9;A0A0U1RR66;A0A0U1RQM8;A0A0U1RQU2;A0A0U1RRI9;A0A0U1RQE9;A0A0U1RQL2;A0A0U1RQJ6;F2Z2V6;A0A0U1RRJ7;A0A0U1RR79	P47897;A0A1B0GVU9;B4DDN1;H7C0R3	Glutamine--tRNA ligase	QARS	sp|P47897|SYQ_HUMAN Glutamine--tRNA ligase OS=Homo sapiens OX=9606 GN=QARS1 PE=1 SV=1;tr|A0A1B0GVU9|A0A1B0GVU9_HUMAN Glutaminyl-tRNA synthetase 1 (Fragment) OS=Homo sapiens OX=9606 GN=QARS1 PE=1 SV=1;tr|B4DDN1|B4DDN1_HUMAN Glutaminyl-tRNA synthetase 1 OS=H	21	20	20	1	1	0	10	7	9	10	12	11	1	1	0	10	7	9	10	12	11	33.2	33.2	87.798	775	775;736;630;253;134;339;91;342;169;194;83;173;173;174;182;187;191;96;100;68;75	0	72.691	2.1	2.1	0	16.5	11.1	15.6	17.5	19.9	20.1	1895500000	5561900	4625800	0	223230000	267200000	181210000	393930000
P33527;I3L4X2;A0A0A0MS99;O15438	P33527;I3L4X2;A0A0A0MS99	Multidrug resistance-associated protein 1	ABCC1	sp|P33527|MRP1_HUMAN Multidrug resistance-associated protein 1 OS=Homo sapiens OX=9606 GN=ABCC1 PE=1 SV=3;tr|I3L4X2|I3L4X2_HUMAN Multidrug resistance-associated protein 1 (Fragment) OS=Homo sapiens OX=9606 GN=ABCC1 PE=1 SV=1;tr|A0A0A0MS99|A0A0A0MS99_HUMAN	4	20	20	0	0	0	14	10	8	12	13	11	0	0	0	14	10	8	12	13	11	21	21	171.59	1531	1531;1440;1215;1527	0	72.243	0	0	0	15.7	11.3	9.1	12.9	14.9	12.7	1921600000	0	0	0	394560000	180140000	87800000	393690000
A0A494C1M4;Q3SY69;H0YHN9	A0A494C1M4;Q3SY69	Mitochondrial 10-formyltetrahydrofolate dehydrogenase	ALDH1L2	tr|A0A494C1M4|A0A494C1M4_HUMAN 10-formyltetrahydrofolate dehydrogenase OS=Homo sapiens OX=9606 GN=ALDH1L2 PE=1 SV=1;sp|Q3SY69|AL1L2_HUMAN Mitochondrial 10-formyltetrahydrofolate dehydrogenase OS=Homo sapiens OX=9606 GN=ALDH1L2 PE=1 SV=2	3	22	20	0	0	0	14	13	14	16	15	14	0	0	0	13	12	12	14	14	14	33.8	31.3	102.85	932	932;923;92	0	71.959	0	0	0	20.3	19.3	20.8	23.8	22.1	21.9	3427400000	0	0	0	499130000	481230000	425700000	695060000
P51149;C9J8S3;C9J592;C9J4V0;C9J4S4;C9IZZ0;C9J7D1	P51149;C9J8S3;C9J592;C9J4V0;C9J4S4	Ras-related protein Rab-7a	RAB7A	sp|P51149|RAB7A_HUMAN Ras-related protein Rab-7a OS=Homo sapiens OX=9606 GN=RAB7A PE=1 SV=1;tr|C9J8S3|C9J8S3_HUMAN Ras-related protein Rab-7a OS=Homo sapiens OX=9606 GN=RAB7A PE=1 SV=1;tr|C9J592|C9J592_HUMAN Ras-related protein Rab-7a (Fragment) OS=Homo sa	7	15	15	4	4	2	12	9	11	10	12	10	4	4	2	12	9	11	10	12	10	72.9	72.9	23.489	207	207;160;150;134;98;116;91	0	71.686	22.2	27.5	14	65.2	54.1	71	59.4	65.7	62.3	8078500000	40930000	22747000	24378000	1370700000	1081700000	1059900000	1669000000
Q15008;C9J7B7;C9J0E9;H7C531	Q15008	26S proteasome non-ATPase regulatory subunit 6	PSMD6	sp|Q15008|PSMD6_HUMAN 26S proteasome non-ATPase regulatory subunit 6 OS=Homo sapiens OX=9606 GN=PSMD6 PE=1 SV=1	4	18	18	2	1	0	11	12	10	14	13	11	2	1	0	11	12	10	14	13	11	51.2	51.2	45.531	389	389;144;226;138	0	71.663	4.4	4.4	0	30.6	37.3	31.1	44	39.1	33.4	4198800000	13410000	5502500	0	495460000	593490000	473670000	911560000
Q96KP1;Q2MDF5	Q96KP1	Exocyst complex component 2	EXOC2	sp|Q96KP1|EXOC2_HUMAN Exocyst complex component 2 OS=Homo sapiens OX=9606 GN=EXOC2 PE=1 SV=1	2	25	25	0	0	0	16	18	11	14	18	13	0	0	0	16	18	11	14	18	13	32.9	32.9	104.07	924	924;140	0	71.458	0	0	0	19.6	24.8	14.5	20.1	24.6	19.6	4247000000	0	0	0	646600000	668990000	332750000	820450000
B4DUC8;Q13126;J3QSB7;F2Z2F3;F8WES2;A0A2R8Y4K0;J3KRN1	B4DUC8;Q13126;J3QSB7	S-methyl-5-thioadenosine phosphorylase;Purine nucleoside phosphorylase	MTAP	tr|B4DUC8|B4DUC8_HUMAN S-methyl-5-thioadenosine phosphorylase OS=Homo sapiens OX=9606 GN=MTAP PE=1 SV=1;sp|Q13126|MTAP_HUMAN S-methyl-5-thioadenosine phosphorylase OS=Homo sapiens OX=9606 GN=MTAP PE=1 SV=2;tr|J3QSB7|J3QSB7_HUMAN Purine nucleoside phospho	7	11	11	1	0	0	8	9	9	9	9	9	1	0	0	8	9	9	9	9	9	52.3	52.3	33.186	300	300;283;242;143;50;55;112	0	71.124	6	0	0	43	48.7	48.7	48.7	48	48.7	8445500000	6676800	0	0	1117200000	1256800000	1021600000	1568800000
Q92598;A0A0A0MSM0;R4GN69;Q5TBM3;D6RJ96;E9PDE8;O95757;A0A3B3IRH7;Q8TDX9	Q92598;A0A0A0MSM0	Heat shock protein 105 kDa	HSPH1	sp|Q92598|HS105_HUMAN Heat shock protein 105 kDa OS=Homo sapiens OX=9606 GN=HSPH1 PE=1 SV=1;tr|A0A0A0MSM0|A0A0A0MSM0_HUMAN Heat shock protein 105 kDa OS=Homo sapiens OX=9606 GN=HSPH1 PE=1 SV=1	9	22	21	4	5	4	16	13	10	14	16	11	4	5	4	15	13	10	13	16	10	30.9	29.3	96.864	858	858;782;115;115;531;813;839;436;2849	0	71.078	7.3	9.1	5.6	25.3	17.9	16.4	20.7	23.3	17.1	2659800000	17818000	10124000	12729000	367310000	372060000	250530000	636910000
K7EIG1;A0A494C0R8;O75153;I3L2B0;I3L318;I3L4B5	K7EIG1;A0A494C0R8;O75153;I3L2B0	Clustered mitochondria protein homolog	CLUH	tr|K7EIG1|K7EIG1_HUMAN Clustered mitochondria protein homolog (Fragment) OS=Homo sapiens OX=9606 GN=CLUH PE=1 SV=2;tr|A0A494C0R8|A0A494C0R8_HUMAN Clustered mitochondria protein homolog OS=Homo sapiens OX=9606 GN=CLUH PE=1 SV=1;sp|O75153|CLU_HUMAN Clustered	6	25	25	0	0	0	19	16	11	17	20	14	0	0	0	19	16	11	17	20	14	30	30	140.49	1251	1251;1348;1309;1297;164;160	0	70.902	0	0	0	21.9	18.1	11.9	19.2	22.9	16.6	3175500000	0	0	0	457630000	431120000	250200000	703180000
A0A0A0MTR7;A0A0A0MTC1;Q63HN8	A0A0A0MTR7;A0A0A0MTC1;Q63HN8	E3 ubiquitin-protein ligase RNF213	RNF213	tr|A0A0A0MTR7|A0A0A0MTR7_HUMAN E3 ubiquitin-protein ligase RNF213 OS=Homo sapiens OX=9606 GN=RNF213 PE=1 SV=1;tr|A0A0A0MTC1|A0A0A0MTC1_HUMAN E3 ubiquitin-protein ligase RNF213 OS=Homo sapiens OX=9606 GN=RNF213 PE=1 SV=1;sp|Q63HN8|RN213_HUMAN E3 ubiquitin-p	3	35	35	0	0	0	16	8	3	13	22	7	0	0	0	16	8	3	13	22	7	9	9	591.4	5207	5207;5256;5207	0	70.812	0	0	0	4.7	2	0.6	3.4	5.5	1.7	1134500000	0	0	0	233790000	107360000	38576000	268760000
Q6NXE6;B4E1N1;H0YH65;F5H3X1;F5H052;F5H2X2;F5H2K4;F5GWV0;F5H4P3;F5H7V0;F5GZP0;H0YGL0;H0YGQ5	Q6NXE6;B4E1N1;H0YH65	Armadillo repeat-containing protein 6	ARMC6	sp|Q6NXE6|ARMC6_HUMAN Armadillo repeat-containing protein 6 OS=Homo sapiens OX=9606 GN=ARMC6 PE=1 SV=2;tr|B4E1N1|B4E1N1_HUMAN Armadillo repeat-containing protein 6 OS=Homo sapiens OX=9606 GN=ARMC6 PE=1 SV=1;tr|H0YH65|H0YH65_HUMAN Armadillo repeat-containin	13	6	6	0	0	0	5	5	5	5	5	4	0	0	0	5	5	5	5	5	4	16	16	54.141	501	501;408;145;70;103;161;163;256;259;30;43;81;137	0	70.788	0	0	0	12.4	14.2	14.2	14.2	14.2	12.2	988920000	0	0	0	129990000	267690000	110690000	180110000
Q6P996;H3BND4;Q86XE2;Q6P474;J3KNK7;Q6XYB5;H3BNL6;H3BPV5;H3BM88;A0A0J9YXH6;H3BU11;H3BQ54	Q6P996;H3BND4	Pyridoxal-dependent decarboxylase domain-containing protein 1	PDXDC1	sp|Q6P996|PDXD1_HUMAN Pyridoxal-dependent decarboxylase domain-containing protein 1 OS=Homo sapiens OX=9606 GN=PDXDC1 PE=1 SV=2;tr|H3BND4|H3BND4_HUMAN Pyridoxal-dependent decarboxylase domain-containing protein 1 OS=Homo sapiens OX=9606 GN=PDXDC1 PE=1 SV=1	12	25	25	0	0	0	18	15	13	14	19	12	0	0	0	18	15	13	14	19	12	45.6	45.6	86.706	788	788;806;498;469;370;204;271;64;81;98;120;185	0	70.784	0	0	0	34.4	26.8	25.4	27.9	37.3	23.6	4328300000	0	0	0	580090000	729320000	508810000	734200000
I3L0N3;P46459;I3L0L3;I3L2G1;K7EQD6;I3L338;I3L4Q9	I3L0N3;P46459	Vesicle-fusing ATPase	NSF	tr|I3L0N3|I3L0N3_HUMAN Vesicle-fusing ATPase OS=Homo sapiens OX=9606 GN=NSF PE=1 SV=1;sp|P46459|NSF_HUMAN Vesicle-fusing ATPase OS=Homo sapiens OX=9606 GN=NSF PE=1 SV=3	7	20	20	6	6	4	7	6	12	3	10	13	6	6	4	7	6	12	3	10	13	32.6	32.6	82.091	739	739;744;161;136;180;44;81	0	70.425	8.5	9.2	7	11.2	9.3	22.7	5	16.2	22.9	2745600000	81189000	92793000	45102000	160210000	184780000	633660000	142760000
Q13509;A0A0B4J269;G3V2A3;G3V5W4;G3V2R8;G3V3R4;G3V2N6;G3V542;G3V3J6;G3V3W7	Q13509;A0A0B4J269	Tubulin beta-3 chain	TUBB3	sp|Q13509|TBB3_HUMAN Tubulin beta-3 chain OS=Homo sapiens OX=9606 GN=TUBB3 PE=1 SV=2;tr|A0A0B4J269|A0A0B4J269_HUMAN G_PROTEIN_RECEP_F1_2 domain-containing protein OS=Homo sapiens OX=9606 PE=1 SV=1	10	24	8	17	13	13	21	21	22	22	23	22	4	1	1	5	6	6	6	7	6	66.4	34.2	50.432	450	450;797;189;97;118;148;164;46;55;87	0	70.38	48.2	32.7	32.7	57.6	58.7	62.7	60.7	60.7	63.8	8603500000	268740000	182350000	115970000	1223400000	923940000	1239400000	1029100000
Q8TEQ6	Q8TEQ6	Gem-associated protein 5	GEMIN5	sp|Q8TEQ6|GEMI5_HUMAN Gem-associated protein 5 OS=Homo sapiens OX=9606 GN=GEMIN5 PE=1 SV=3	1	17	17	0	0	0	11	9	3	12	11	8	0	0	0	11	9	3	12	11	8	17.4	17.4	168.59	1508	1508	0	70.369	0	0	0	13	11.3	4.4	13.4	12.9	10	1496500000	0	0	0	263030000	156320000	99141000	313830000
Q9NSE4	Q9NSE4	Isoleucine--tRNA ligase, mitochondrial	IARS2	sp|Q9NSE4|SYIM_HUMAN Isoleucine--tRNA ligase, mitochondrial OS=Homo sapiens OX=9606 GN=IARS2 PE=1 SV=2	1	8	8	1	0	0	8	5	3	5	4	3	1	0	0	8	5	3	5	4	3	9.8	9.8	113.79	1012	1012	0	69.736	1.1	0	0	9.8	6.3	4	6.3	5.2	4	864300000	0	0	0	184300000	106920000	60456000	208880000
P62937;F8WE65;C9J5S7;E5RIZ5;P0DN26;A0A0H2UH34;A0A0B4J2A2;A0A075B767;A0A075B759;Q9Y536;F5H284	P62937;F8WE65;C9J5S7	Peptidyl-prolyl cis-trans isomerase A;Peptidyl-prolyl cis-trans isomerase A, N-terminally processed;Peptidyl-prolyl cis-trans isomerase	PPIA	sp|P62937|PPIA_HUMAN Peptidyl-prolyl cis-trans isomerase A OS=Homo sapiens OX=9606 GN=PPIA PE=1 SV=2;tr|F8WE65|F8WE65_HUMAN Peptidyl-prolyl cis-trans isomerase OS=Homo sapiens OX=9606 GN=PPIA PE=1 SV=1;tr|C9J5S7|C9J5S7_HUMAN Peptidyl-prolyl cis-trans isome	11	12	12	9	8	8	10	10	10	12	11	9	9	8	8	10	10	10	12	11	9	67.3	67.3	18.012	165	165;120;121;58;164;164;164;164;164;164;164	0	69.638	63	44.8	61.2	66.7	66.7	66.7	67.3	66.7	66.7	35342000000	529990000	408400000	507910000	4136400000	5372500000	3705500000	7485900000
I3L2C7;P57678;I3L399;I3L4A4;E7EN12;I3L4M4;I3L1J7	I3L2C7;P57678	Gem-associated protein 4	GEMIN4	tr|I3L2C7|I3L2C7_HUMAN Gem-associated protein 4 OS=Homo sapiens OX=9606 GN=GEMIN4 PE=1 SV=1;sp|P57678|GEMI4_HUMAN Gem-associated protein 4 OS=Homo sapiens OX=9606 GN=GEMIN4 PE=1 SV=2	7	19	19	0	0	0	11	11	6	12	13	11	0	0	0	11	11	6	12	13	11	23.3	23.3	118.82	1047	1047;1058;296;271;184;189;70	0	69.496	0	0	0	15.3	14.6	8.7	13.9	16.6	15.8	1985900000	0	0	0	290290000	324880000	158400000	345150000
Q9HCE0;K7EPN4;K7ENS1;K7EM87;K7ENK5	Q9HCE0	Ectopic P granules protein 5 homolog	EPG5	sp|Q9HCE0|EPG5_HUMAN Ectopic P granules protein 5 homolog OS=Homo sapiens OX=9606 GN=EPG5 PE=1 SV=2	5	21	21	0	0	0	12	10	9	8	12	8	0	0	0	12	10	9	8	12	8	13.4	13.4	292.48	2579	2579;856;505;657;336	0	69.462	0	0	0	7.8	6.9	4.9	4.6	7	4.7	2164400000	0	0	0	230180000	334440000	269370000	357230000
Q9Y6N5;H3BNX3;H3BMS6;H3BNP9;A0A1B0GXB4;H3BV36	Q9Y6N5;H3BNX3	Sulfide:quinone oxidoreductase, mitochondrial	SQRDL	sp|Q9Y6N5|SQOR_HUMAN Sulfide:quinone oxidoreductase, mitochondrial OS=Homo sapiens OX=9606 GN=SQOR PE=1 SV=1;tr|H3BNX3|H3BNX3_HUMAN Pyr_redox_2 domain-containing protein (Fragment) OS=Homo sapiens OX=9606 PE=4 SV=1	6	21	21	0	0	0	11	11	13	13	15	16	0	0	0	11	11	13	13	15	16	54.4	54.4	49.96	450	450;289;181;124;140;141	0	69.228	0	0	0	33.8	35.1	37.3	41.6	36.2	52	4526700000	0	0	0	506240000	635760000	490530000	999570000
P18669;Q8N0Y7;P15259	P18669	Phosphoglycerate mutase 1	PGAM1	sp|P18669|PGAM1_HUMAN Phosphoglycerate mutase 1 OS=Homo sapiens OX=9606 GN=PGAM1 PE=1 SV=2	3	12	12	8	7	6	8	8	7	9	9	6	8	7	6	8	8	7	9	9	6	50.8	50.8	28.804	254	254;254;253	0	69.137	36.6	39.8	36.2	34.3	40.2	39.8	42.1	46.1	29.5	7906000000	143290000	93084000	137330000	1377600000	963450000	1322400000	1630300000
A0A494C1L5;A0A494BZW2;P50851;E9PEM5;H0YAC6;A0A494C0R9;A0A3B3IS13;H0YA17	A0A494C1L5;A0A494BZW2;P50851;E9PEM5;H0YAC6;A0A494C0R9	Lipopolysaccharide-responsive and beige-like anchor protein	LRBA	tr|A0A494C1L5|A0A494C1L5_HUMAN Lipopolysaccharide-responsive and beige-like anchor protein OS=Homo sapiens OX=9606 GN=LRBA PE=1 SV=1;tr|A0A494BZW2|A0A494BZW2_HUMAN Lipopolysaccharide-responsive and beige-like anchor protein (Fragment) OS=Homo sapiens OX=96	8	24	20	0	0	0	9	12	7	12	16	7	0	0	0	6	10	6	9	13	4	11.8	10.1	317.79	2852	2852;2095;2863;2575;1505;1880;686;147	0	69.119	0	0	0	4.2	6.2	3.1	5.1	8.5	2.6	9194300000	0	0	0	8357600000	68949000	98596000	279890000
O14617;A0A2R8Y611;A0A2R8Y4J3;A0A087WYN6;K7ERW8	O14617;A0A2R8Y611	AP-3 complex subunit delta-1	AP3D1	sp|O14617|AP3D1_HUMAN AP-3 complex subunit delta-1 OS=Homo sapiens OX=9606 GN=AP3D1 PE=1 SV=1;tr|A0A2R8Y611|A0A2R8Y611_HUMAN AP-3 complex subunit delta-1 (Fragment) OS=Homo sapiens OX=9606 GN=AP3D1 PE=1 SV=1	5	9	9	0	1	1	4	3	1	6	4	6	0	1	1	4	3	1	6	4	6	11.4	11.4	130.16	1153	1153;945;431;203;174	0	69.074	0	1	1	5.4	4.3	1	7.8	5.5	7.5	556150000	0	4945200	3685000	94997000	44775000	32902000	145150000
Q14008;H0YDX5;E9PQH5;H0YCF6;H0YEK7	Q14008	Cytoskeleton-associated protein 5	CKAP5	sp|Q14008|CKAP5_HUMAN Cytoskeleton-associated protein 5 OS=Homo sapiens OX=9606 GN=CKAP5 PE=1 SV=3	5	21	21	0	0	0	13	11	8	13	13	10	0	0	0	13	11	8	13	13	10	15	15	225.49	2032	2032;203;151;166;190	0	69.06	0	0	0	8.7	8.3	4.9	8.6	10.6	8.5	2178900000	0	0	0	310710000	322770000	204830000	536710000
O43169;J3QR91	O43169	Cytochrome b5 type B	CYB5B	sp|O43169|CYB5B_HUMAN Cytochrome b5 type B OS=Homo sapiens OX=9606 GN=CYB5B PE=1 SV=3	2	6	2	0	0	0	4	3	5	4	5	5	0	0	0	2	1	1	1	2	1	59.3	18	16.694	150	150;64	0	68.937	0	0	0	53.3	30.7	59.3	53.3	53.3	59.3	2697600000	0	0	0	242950000	253090000	230460000	554370000
P61019;E9PKL7;A0A3B3ITL1;H7C125;E9PE37;H0YD31;Q6PIK3	P61019;E9PKL7;A0A3B3ITL1	Ras-related protein Rab-2A	RAB2A	sp|P61019|RAB2A_HUMAN Ras-related protein Rab-2A OS=Homo sapiens OX=9606 GN=RAB2A PE=1 SV=1;tr|E9PKL7|E9PKL7_HUMAN Ras-related protein Rab-2A OS=Homo sapiens OX=9606 GN=RAB2A PE=1 SV=1;tr|A0A3B3ITL1|A0A3B3ITL1_HUMAN Ras-related protein Rab-2B OS=Homo sapie	7	9	4	2	3	2	8	7	9	7	7	8	2	2	2	4	3	4	3	3	3	54.7	24.1	23.545	212	212;181;208;104;62;135;121	0	68.879	14.2	20.3	14.2	47.2	43.9	54.7	40.6	43.9	51.4	4831300000	9261300	18478000	11412000	652040000	539010000	726420000	940820000
A0A2R8Y5F1;A0A2R8YGU4;X5D2U8;H3BMQ0;A0A2R8YDZ2;A0A2R8Y7X5;A0A2R8YDR3;A0A2R8Y7C8;A0A2R8YGD6;P49815;A0A2R8Y6C9;A0A2R8YEJ8;A0A2R8Y5B2;A0A2R8YGE6;A0A2R8YHA2;H3BQY7;A0A2R8YCR8;A0A2R8Y692;Q5HYF7;C9JX95	A0A2R8Y5F1;A0A2R8YGU4;X5D2U8;H3BMQ0;A0A2R8YDZ2;A0A2R8Y7X5;A0A2R8YDR3;A0A2R8Y7C8;A0A2R8YGD6;P49815;A0A2R8Y6C9	Tuberin	TSC2	tr|A0A2R8Y5F1|A0A2R8Y5F1_HUMAN Tuberin OS=Homo sapiens OX=9606 GN=TSC2 PE=1 SV=1;tr|A0A2R8YGU4|A0A2R8YGU4_HUMAN Tuberin OS=Homo sapiens OX=9606 GN=TSC2 PE=1 SV=1;tr|X5D2U8|X5D2U8_HUMAN Tuberin (Fragment) OS=Homo sapiens OX=9606 GN=TSC2 PE=1 SV=1;tr|H3BMQ0|	20	16	16	0	0	0	7	9	9	8	7	6	0	0	0	7	9	9	8	7	6	14.3	14.3	193.03	1738	1738;1739;1741;1751;1760;1769;1781;1782;1805;1807;1359;572;237;384;65;30;86;88;108;136	0	68.831	0	0	0	6.7	7.4	7.8	6.8	6.5	6.7	4448600000	0	0	0	245430000	137180000	1447700000	2319000000
O76094;R4GNC1;D6RDY6	O76094;R4GNC1;D6RDY6	Signal recognition particle subunit SRP72	SRP72	sp|O76094|SRP72_HUMAN Signal recognition particle subunit SRP72 OS=Homo sapiens OX=9606 GN=SRP72 PE=1 SV=3;tr|R4GNC1|R4GNC1_HUMAN Signal recognition particle subunit SRP72 OS=Homo sapiens OX=9606 GN=SRP72 PE=1 SV=1;tr|D6RDY6|D6RDY6_HUMAN Signal recognition	3	12	12	1	1	0	8	7	2	7	5	6	1	1	0	8	7	2	7	5	6	27.7	27.7	74.605	671	671;220;335	0	68.794	2.8	2.5	0	19.4	14	4.3	15.8	11.9	13.3	451360000	0	3495400	0	107300000	88169000	12724000	111840000
A0A087WW40;Q9Y371	A0A087WW40;Q9Y371	Endophilin-B1	SH3GLB1	tr|A0A087WW40|A0A087WW40_HUMAN Endophilin-B1 OS=Homo sapiens OX=9606 GN=SH3GLB1 PE=1 SV=1;sp|Q9Y371|SHLB1_HUMAN Endophilin-B1 OS=Homo sapiens OX=9606 GN=SH3GLB1 PE=1 SV=1	2	13	13	0	0	0	9	6	4	7	10	8	0	0	0	9	6	4	7	10	8	35.8	35.8	44.26	394	394;365	0	68.755	0	0	0	27.2	22.6	11.7	22.3	29.7	21.1	2270800000	0	0	0	284900000	300800000	169460000	431970000
Q9NR30;A0A087WVC1;Q9BQ39	Q9NR30	Nucleolar RNA helicase 2	DDX21	sp|Q9NR30|DDX21_HUMAN Nucleolar RNA helicase 2 OS=Homo sapiens OX=9606 GN=DDX21 PE=1 SV=5	3	13	13	0	0	1	9	7	7	4	7	5	0	0	1	9	7	7	4	7	5	20.1	20.1	87.343	783	783;730;737	0	68.646	0	0	1.7	14.4	12.9	12.3	7	11.1	7.3	680220000	0	0	493080	154630000	113750000	62407000	117770000
Q96AE4;E9PEB5;C9JSZ1	Q96AE4;E9PEB5	Far upstream element-binding protein 1	FUBP1	sp|Q96AE4|FUBP1_HUMAN Far upstream element-binding protein 1 OS=Homo sapiens OX=9606 GN=FUBP1 PE=1 SV=3;tr|E9PEB5|E9PEB5_HUMAN Far upstream element-binding protein 1 OS=Homo sapiens OX=9606 GN=FUBP1 PE=1 SV=1	3	12	11	1	3	2	8	7	7	7	7	10	1	3	2	8	6	6	7	7	9	27	25.6	67.56	644	644;655;232	0	68.609	2	6.4	3.6	17.5	13.4	14.8	14.8	15.7	22.4	2699700000	0	8200300	2368200	388260000	384930000	314010000	431390000
O43852;H0Y875	O43852;H0Y875	Calumenin	CALU	sp|O43852|CALU_HUMAN Calumenin OS=Homo sapiens OX=9606 GN=CALU PE=1 SV=2;tr|H0Y875|H0Y875_HUMAN Calumenin (Fragment) OS=Homo sapiens OX=9606 GN=CALU PE=1 SV=1	2	13	13	0	0	0	10	10	12	9	9	10	0	0	0	10	10	12	9	9	10	42.9	42.9	37.106	315	315;147	0	68.607	0	0	0	36.2	35.2	42.9	38.4	35.2	37.8	11705000000	0	0	0	2046500000	2141700000	2722500000	1380800000
P60866;E5RJX2;E5RIP1;G3XAN0	P60866;E5RJX2	40S ribosomal protein S20	RPS20	sp|P60866|RS20_HUMAN 40S ribosomal protein S20 OS=Homo sapiens OX=9606 GN=RPS20 PE=1 SV=1;tr|E5RJX2|E5RJX2_HUMAN 40S ribosomal protein S20 OS=Homo sapiens OX=9606 GN=RPS20 PE=1 SV=1	4	5	5	3	2	3	5	4	3	4	4	3	3	2	3	5	4	3	4	4	3	45.4	45.4	13.373	119	119;61;46;64	0	67.991	36.1	19.3	36.1	45.4	39.5	22.7	39.5	39.5	22.7	13160000000	100600000	73897000	79081000	1980300000	1881000000	1562400000	2810100000
A2A274;Q99798	A2A274;Q99798	Aconitate hydratase, mitochondrial	ACO2	tr|A2A274|A2A274_HUMAN Aconitate hydratase, mitochondrial OS=Homo sapiens OX=9606 GN=ACO2 PE=1 SV=1;sp|Q99798|ACON_HUMAN Aconitate hydratase, mitochondrial OS=Homo sapiens OX=9606 GN=ACO2 PE=1 SV=2	2	19	19	5	8	4	5	5	8	6	5	10	5	8	4	5	5	8	6	5	10	32.9	32.9	87.819	805	805;780	0	67.946	8.7	12.9	7.1	8.9	9.9	13.7	11.8	8.8	16.6	1920000000	22758000	71316000	8630400	185840000	145680000	446870000	282510000
P04181	P04181	Ornithine aminotransferase, mitochondrial;Ornithine aminotransferase, hepatic form;Ornithine aminotransferase, renal form	OAT	sp|P04181|OAT_HUMAN Ornithine aminotransferase, mitochondrial OS=Homo sapiens OX=9606 GN=OAT PE=1 SV=1	1	7	7	1	0	0	7	5	6	6	7	6	1	0	0	7	5	6	6	7	6	25.1	25.1	48.534	439	439	0	67.925	3	0	0	25.1	18	21.6	21.4	25.1	21.6	2063100000	2234100	0	0	420010000	219010000	215470000	444920000
P67809;H0Y449;C9J5V9;Q9Y2T7	P67809;H0Y449	Nuclease-sensitive element-binding protein 1	YBX1	sp|P67809|YBOX1_HUMAN Y-box-binding protein 1 OS=Homo sapiens OX=9606 GN=YBX1 PE=1 SV=3;tr|H0Y449|H0Y449_HUMAN Y-box-binding protein 1 (Fragment) OS=Homo sapiens OX=9606 GN=YBX1 PE=1 SV=1	4	9	6	4	3	3	7	7	6	9	8	8	4	3	3	5	5	5	6	5	5	40.4	35.5	35.924	324	324;374;216;364	0	67.892	29.3	21	21	40.4	35.2	34.9	40.4	40.4	40.4	3230800000	21389000	10977000	25202000	426200000	380780000	298330000	572650000
Q9NY33;G3V1D3;G3V180;E9PKK8;E9PQ14;E9PPK9;E9PNX5;E9PQF2	Q9NY33;G3V1D3;G3V180;E9PKK8;E9PQ14;E9PPK9	Dipeptidyl peptidase 3	DPP3	sp|Q9NY33|DPP3_HUMAN Dipeptidyl peptidase 3 OS=Homo sapiens OX=9606 GN=DPP3 PE=1 SV=2;tr|G3V1D3|G3V1D3_HUMAN Dipeptidyl peptidase 3 OS=Homo sapiens OX=9606 GN=DPP3 PE=1 SV=1;tr|G3V180|G3V180_HUMAN Dipeptidyl peptidase 3 OS=Homo sapiens OX=9606 GN=DPP3 PE=1	8	6	6	1	0	0	3	2	2	5	6	4	1	0	0	3	2	2	5	6	4	15.6	15.6	82.588	737	737;756;757;170;177;201;104;90	0	67.839	2.7	0	0	7.5	5.2	4.6	12.2	15.6	10.9	293150000	4005500	0	0	43334000	17741000	10218000	137130000
P48147;A0A499FJL1	P48147;A0A499FJL1	Prolyl endopeptidase	PREP	sp|P48147|PPCE_HUMAN Prolyl endopeptidase OS=Homo sapiens OX=9606 GN=PREP PE=1 SV=2;tr|A0A499FJL1|A0A499FJL1_HUMAN Prolyl endopeptidase OS=Homo sapiens OX=9606 GN=PREP PE=1 SV=1	2	10	10	1	1	0	6	4	3	7	5	3	1	1	0	6	4	3	7	5	3	22.1	22.1	80.699	710	710;644	0	67.659	1.8	1.8	0	12.7	9.2	5.9	16.1	11.1	7.3	782090000	0	0	0	97007000	93955000	94499000	243080000
P17858	P17858	ATP-dependent 6-phosphofructokinase, liver type	PFKL	sp|P17858|PFKAL_HUMAN ATP-dependent 6-phosphofructokinase, liver type OS=Homo sapiens OX=9606 GN=PFKL PE=1 SV=6	1	15	12	4	2	2	11	7	12	11	10	13	1	0	0	9	5	10	9	8	11	33.5	28.7	85.018	780	780	0	67.598	6.2	3.6	3.6	24.2	15.9	26.3	24.2	22.9	30.8	3162700000	3857200	0	0	478860000	274940000	404400000	626090000
Q9BSJ8;F8VZB1	Q9BSJ8	Extended synaptotagmin-1	ESYT1	sp|Q9BSJ8|ESYT1_HUMAN Extended synaptotagmin-1 OS=Homo sapiens OX=9606 GN=ESYT1 PE=1 SV=1	2	22	22	0	0	0	15	13	10	10	13	9	0	0	0	15	13	10	10	13	9	28.6	28.6	122.85	1104	1104;88	0	67.336	0	0	0	18.5	17.8	13.9	13.5	19.2	12.2	3015300000	0	0	0	545480000	386550000	278800000	564680000
Q16531;F5GY55;F5GWI0;F5GZY8;F5H2L3;F5GYG8;F5H198	Q16531;F5GY55	DNA damage-binding protein 1	DDB1	sp|Q16531|DDB1_HUMAN DNA damage-binding protein 1 OS=Homo sapiens OX=9606 GN=DDB1 PE=1 SV=1;tr|F5GY55|F5GY55_HUMAN DNA damage-binding protein 1 OS=Homo sapiens OX=9606 GN=DDB1 PE=1 SV=1	7	21	21	2	4	4	11	9	10	14	16	13	2	4	4	11	9	10	14	16	13	28	28	126.97	1140	1140;1092;139;146;165;109;162	0	67.061	2.5	3.9	6.1	15.4	11.3	11.6	20	21.5	16.8	2658000000	7199000	10799000	10617000	322330000	291540000	273470000	590540000
Q6P3X3;A0A3B3IS02;F8WCH1;H7C3A3;C9JVS4	Q6P3X3;A0A3B3IS02	Tetratricopeptide repeat protein 27	TTC27	sp|Q6P3X3|TTC27_HUMAN Tetratricopeptide repeat protein 27 OS=Homo sapiens OX=9606 GN=TTC27 PE=1 SV=1;tr|A0A3B3IS02|A0A3B3IS02_HUMAN Tetratricopeptide repeat protein 27 OS=Homo sapiens OX=9606 GN=TTC27 PE=1 SV=1	5	12	12	0	0	0	7	7	7	8	8	8	0	0	0	7	7	7	8	8	8	19.2	19.2	96.631	843	843;350;41;100;115	0	67.06	0	0	0	12.1	11.7	12.7	14.1	14.1	13	1875700000	0	0	0	214330000	229040000	197230000	478690000
P62753;A2A3R5;A2A3R7	P62753;A2A3R5	40S ribosomal protein S6	RPS6	sp|P62753|RS6_HUMAN 40S ribosomal protein S6 OS=Homo sapiens OX=9606 GN=RPS6 PE=1 SV=1;tr|A2A3R5|A2A3R5_HUMAN 40S ribosomal protein S6 OS=Homo sapiens OX=9606 GN=RPS6 PE=1 SV=1	3	13	13	10	12	11	9	7	7	8	7	7	10	12	11	9	7	7	8	7	7	34.1	34.1	28.68	249	249;218;91	0	67.047	32.9	33.7	33.3	24.9	24.5	24.5	24.9	24.5	24.5	28097000000	1387500000	1313000000	1602000000	4134700000	3788000000	2446900000	3859500000
P60880;A0A0A0MSS0	P60880;A0A0A0MSS0	Synaptosomal-associated protein 25	SNAP25	sp|P60880|SNP25_HUMAN Synaptosomal-associated protein 25 OS=Homo sapiens OX=9606 GN=SNAP25 PE=1 SV=1;tr|A0A0A0MSS0|A0A0A0MSS0_HUMAN Synaptosomal-associated protein 25 (Fragment) OS=Homo sapiens OX=9606 GN=SNAP25 PE=1 SV=1	2	12	12	2	4	0	0	0	10	0	0	6	2	4	0	0	0	10	0	0	6	55.8	55.8	23.315	206	206;93	0	66.941	11.7	23.3	0	0	0	43.7	0	0	35.9	374420000	10205000	14604000	0	0	0	239140000	0
Q9NZ08;H0Y9X5;D6RAL9	Q9NZ08	Endoplasmic reticulum aminopeptidase 1	ERAP1	sp|Q9NZ08|ERAP1_HUMAN Endoplasmic reticulum aminopeptidase 1 OS=Homo sapiens OX=9606 GN=ERAP1 PE=1 SV=3	3	26	26	0	0	0	18	19	15	21	21	14	0	0	0	18	19	15	21	21	14	34.1	34.1	107.23	941	941;144;129	0	66.903	0	0	0	23	24.4	18.2	27.7	26.9	17.7	6001200000	0	0	0	823250000	1026300000	573430000	1273400000
V9GYY3;A0A384N5Y3;F5H2F4;P11586;V9GZ78;A0A494C1T2	V9GYY3;A0A384N5Y3;F5H2F4;P11586;V9GZ78;A0A494C1T2	C-1-tetrahydrofolate synthase, cytoplasmic;Methylenetetrahydrofolate dehydrogenase;Methenyltetrahydrofolate cyclohydrolase;Formyltetrahydrofolate synthetase;C-1-tetrahydrofolate synthase, cytoplasmic, N-terminally processed	MTHFD1	tr|V9GYY3|V9GYY3_HUMAN C-1-tetrahydrofolate synthase, cytoplasmic OS=Homo sapiens OX=9606 GN=MTHFD1 PE=1 SV=2;tr|A0A384N5Y3|A0A384N5Y3_HUMAN C-1-tetrahydrofolate synthase, cytoplasmic OS=Homo sapiens OX=9606 GN=MTHFD1 PE=1 SV=1;tr|F5H2F4|F5H2F4_HUMAN C-1-t	6	26	26	2	1	0	19	13	11	15	20	13	2	1	0	19	13	11	15	20	13	33.5	33.5	99.719	922	922;935;964;935;854;644	0	66.576	2.5	1.3	0	24.3	16.3	16.5	22.6	25.9	19.1	3384000000	12274000	2744400	0	471650000	397820000	252420000	768950000
Q9NV96	Q9NV96	Cell cycle control protein 50A	TMEM30A	sp|Q9NV96|CC50A_HUMAN Cell cycle control protein 50A OS=Homo sapiens OX=9606 GN=TMEM30A PE=1 SV=1	1	3	3	0	1	0	2	3	3	3	3	2	0	1	0	2	3	3	3	3	2	12.7	12.7	40.683	361	361	0	66.541	0	4.7	0	8.3	12.7	12.7	12.7	12.7	9.1	138760000	0	0	0	15747000	21745000	10927000	21539000
Q08188;A0A494C0J7	Q08188;A0A494C0J7	Protein-glutamine gamma-glutamyltransferase E;Protein-glutamine gamma-glutamyltransferase E 50 kDa catalytic chain;Protein-glutamine gamma-glutamyltransferase E 27 kDa non-catalytic chain	TGM3	sp|Q08188|TGM3_HUMAN Protein-glutamine gamma-glutamyltransferase E OS=Homo sapiens OX=9606 GN=TGM3 PE=1 SV=4;tr|A0A494C0J7|A0A494C0J7_HUMAN TGc domain-containing protein OS=Homo sapiens OX=9606 PE=4 SV=1	2	13	13	9	6	9	2	5	4	0	2	3	9	6	9	2	5	4	0	2	3	27.7	27.7	76.631	693	693;712	0	66.535	21.4	13.1	21.1	3.5	9.7	9.4	0	2.6	5.3	535260000	167890000	55005000	93813000	30600000	96792000	7120800	0
Q9UK41;E9PQR7;E9PM90;E9PR04;E9PLM9	Q9UK41;E9PQR7;E9PM90	Vacuolar protein sorting-associated protein 28 homolog	VPS28	sp|Q9UK41|VPS28_HUMAN Vacuolar protein sorting-associated protein 28 homolog OS=Homo sapiens OX=9606 GN=VPS28 PE=1 SV=1;tr|E9PQR7|E9PQR7_HUMAN Vacuolar protein sorting-associated protein 28 homolog (Fragment) OS=Homo sapiens OX=9606 GN=VPS28 PE=1 SV=1;tr|E	5	10	10	0	0	0	8	10	8	9	9	8	0	0	0	8	10	8	9	9	8	58.8	58.8	25.425	221	221;161;185;53;35	0	66.525	0	0	0	47.1	58.8	47.1	47.5	58.8	43	3387800000	0	0	0	611150000	578560000	529580000	667900000
P51148;K7ENY4;K7ERI8;K7ERQ8;F8VVK3;F8VWU4;F8VVZ0;K7EIP6;F8VSF8	P51148;K7ENY4;K7ERI8;K7ERQ8;F8VVK3	Ras-related protein Rab-5C	RAB5C	sp|P51148|RAB5C_HUMAN Ras-related protein Rab-5C OS=Homo sapiens OX=9606 GN=RAB5C PE=1 SV=2;tr|K7ENY4|K7ENY4_HUMAN Ras-related protein Rab-5C (Fragment) OS=Homo sapiens OX=9606 GN=RAB5C PE=1 SV=1;tr|K7ERI8|K7ERI8_HUMAN Uncharacterized protein OS=Homo sapie	9	8	6	2	2	1	6	5	6	6	8	6	2	2	1	5	4	5	4	6	5	61.1	51.4	23.482	216	216;150;161;282;124;91;100;27;74	0	66.488	16.7	12	5.6	43.1	36.6	49.5	42.6	61.1	50.9	2897700000	21238000	16047000	13331000	523930000	181030000	257060000	700870000
P49748;G3V1M7;K7EQP4;J3QRJ8;J3QKU9;J3KSR4;K7EMF8;J3KS89;K7EJW8	P49748	Very long-chain specific acyl-CoA dehydrogenase, mitochondrial	ACADVL	sp|P49748|ACADV_HUMAN Very long-chain specific acyl-CoA dehydrogenase, mitochondrial OS=Homo sapiens OX=9606 GN=ACADVL PE=1 SV=1	9	16	16	0	1	0	11	12	8	11	12	8	0	1	0	11	12	8	11	12	8	38.6	38.6	70.389	655	655;282;224;194;155;204;45;76;157	0	66.2	0	1.5	0	28.9	29.6	18.6	26.9	29.3	21.8	2475100000	0	0	0	365690000	408670000	207110000	586110000
P67936;A0A2R8Y5V9;A0A2R8YGX3;A0A2R8YH90;A0A2R8YE05;K7ENT6;A0A590UJB9;A0A590UK79;A0A5F9UN72;K7EPB9	P67936;A0A2R8Y5V9;A0A2R8YGX3;A0A2R8YH90;A0A2R8YE05;K7ENT6	Tropomyosin alpha-4 chain	TPM4	sp|P67936|TPM4_HUMAN Tropomyosin alpha-4 chain OS=Homo sapiens OX=9606 GN=TPM4 PE=1 SV=3;tr|A0A2R8Y5V9|A0A2R8Y5V9_HUMAN Tropomyosin alpha-4 chain OS=Homo sapiens OX=9606 GN=TPM4 PE=1 SV=1;tr|A0A2R8YGX3|A0A2R8YGX3_HUMAN Tropomyosin alpha-4 chain OS=Homo sap	10	14	7	6	5	7	11	11	9	11	11	10	2	3	1	5	5	4	5	4	5	47.6	25.8	28.521	248	248;248;183;220;226;245;44;56;158;110	0	66.044	27	26.6	27	39.9	37.5	26.6	35.1	40.3	35.1	3224200000	30575000	37514000	38908000	632870000	439610000	312180000	745500000
P25205;J3KQ69;A0A499FHX9;Q7Z6P5	P25205;J3KQ69;A0A499FHX9	DNA replication licensing factor MCM3	MCM3	sp|P25205|MCM3_HUMAN DNA replication licensing factor MCM3 OS=Homo sapiens OX=9606 GN=MCM3 PE=1 SV=3;tr|J3KQ69|J3KQ69_HUMAN DNA replication licensing factor MCM3 OS=Homo sapiens OX=9606 GN=MCM3 PE=1 SV=3;tr|A0A499FHX9|A0A499FHX9_HUMAN DNA replication licen	4	22	22	0	0	0	12	9	8	10	9	11	0	0	0	12	9	8	10	9	11	41.6	41.6	90.98	808	808;762;818;328	0	65.979	0	0	0	24.6	17.9	14.2	21.8	20	22	2698000000	0	0	0	398500000	467600000	202530000	566900000
O15397;F5GXT5;F5H2I3;F5H244;F5H292;A0A087WXH2;H0YH64	O15397	Importin-8	IPO8	sp|O15397|IPO8_HUMAN Importin-8 OS=Homo sapiens OX=9606 GN=IPO8 PE=1 SV=2	7	18	17	0	0	0	14	10	8	11	13	10	0	0	0	13	9	7	10	12	9	22.9	21.9	119.94	1037	1037;151;46;167;84;142;167	0	65.971	0	0	0	17.8	14.1	10.1	14.6	17.7	11.9	43932000000	0	0	0	6848000000	8144100000	6503100000	7740000000
Q8IZ07;S4R3D2;H0YIN8;F8W150;S4R3U2;Q6ZTN6	Q8IZ07	Ankyrin repeat domain-containing protein 13A	ANKRD13A	sp|Q8IZ07|AN13A_HUMAN Ankyrin repeat domain-containing protein 13A OS=Homo sapiens OX=9606 GN=ANKRD13A PE=1 SV=3	6	16	16	0	0	0	8	8	8	9	11	8	0	0	0	8	8	8	9	11	8	36.6	36.6	67.618	590	590;173;301;83;173;518	0	65.772	0	0	0	17.5	15.8	20.2	23.9	21.4	19	1706400000	0	0	0	192690000	219030000	215510000	278250000
P62258;B4DJF2;I3L3T1;K7EIT4;K7EM20;I3L0W5	P62258;B4DJF2;I3L3T1	14-3-3 protein epsilon	YWHAE	sp|P62258|1433E_HUMAN 14-3-3 protein epsilon OS=Homo sapiens OX=9606 GN=YWHAE PE=1 SV=1;tr|B4DJF2|B4DJF2_HUMAN 14-3-3 protein epsilon OS=Homo sapiens OX=9606 GN=YWHAE PE=1 SV=1;tr|I3L3T1|I3L3T1_HUMAN 14-3-3 protein epsilon OS=Homo sapiens OX=9606 GN=YWHAE	6	21	19	10	11	9	15	14	15	14	14	12	9	10	9	13	12	13	12	12	11	74.5	67.5	29.174	255	255;94;107;109;115;38	0	65.452	57.3	56.9	41.2	69.8	63.1	63.1	63.1	63.1	59.6	27677000000	331210000	173600000	225200000	4219100000	4389400000	4586300000	5345300000
Q16832;Q5T244	Q16832	Discoidin domain-containing receptor 2	DDR2	sp|Q16832|DDR2_HUMAN Discoidin domain-containing receptor 2 OS=Homo sapiens OX=9606 GN=DDR2 PE=1 SV=2	2	20	20	0	0	0	3	2	3	14	17	15	0	0	0	3	2	3	14	17	15	31.2	31.2	96.735	855	855;148	0	65.336	0	0	0	4.4	4	5.1	23.9	28.3	24	5519200000	0	0	0	57162000	80403000	28485000	1443900000
P16152;E9PQ63;A8MTM1	P16152;E9PQ63;A8MTM1	Carbonyl reductase [NADPH] 1	CBR1	sp|P16152|CBR1_HUMAN Carbonyl reductase [NADPH] 1 OS=Homo sapiens OX=9606 GN=CBR1 PE=1 SV=3;tr|E9PQ63|E9PQ63_HUMAN Carbonyl reductase [NADPH] 1 OS=Homo sapiens OX=9606 GN=CBR1 PE=1 SV=1;tr|A8MTM1|A8MTM1_HUMAN Carbonyl reductase [NADPH] 1 OS=Homo sapiens OX	3	10	8	4	2	4	9	7	6	9	7	8	3	1	3	7	5	4	7	5	6	52.3	41.9	30.375	277	277;178;222	0	65.025	26	10.8	20.6	48.4	39	34.7	48.4	40.4	44.4	3292900000	17438000	5550700	24686000	352460000	516530000	282310000	902280000
O15127;H3BV04;H3BN93;H3BUB6;H3BPL9	O15127;H3BV04;H3BN93;H3BUB6;H3BPL9	Secretory carrier-associated membrane protein 2	SCAMP2	sp|O15127|SCAM2_HUMAN Secretory carrier-associated membrane protein 2 OS=Homo sapiens OX=9606 GN=SCAMP2 PE=1 SV=2;tr|H3BV04|H3BV04_HUMAN Secretory carrier-associated membrane protein (Fragment) OS=Homo sapiens OX=9606 GN=SCAMP2 PE=1 SV=1;tr|H3BN93|H3BN93_H	5	2	2	0	0	0	2	2	1	2	2	2	0	0	0	2	2	1	2	2	2	9.7	9.7	36.648	329	329;194;236;254;278	0	64.977	0	0	0	9.7	9.7	3.6	9.7	9.7	9.7	1858600000	0	0	0	328880000	99275000	157570000	529070000
Q13308;H0Y8F1;C9JQR6;Q86X91;F8WDG7;H7C5L0;C9J9E8	Q13308	Inactive tyrosine-protein kinase 7	PTK7	sp|Q13308|PTK7_HUMAN Inactive tyrosine-protein kinase 7 OS=Homo sapiens OX=9606 GN=PTK7 PE=1 SV=2	7	14	14	0	0	0	9	4	6	8	12	7	0	0	0	9	4	6	8	12	7	22.6	22.6	118.39	1070	1070;365;257;459;157;269;139	0	64.944	0	0	0	13.8	6.8	9.1	13.6	20.6	12.1	1512800000	0	0	0	223310000	173740000	55046000	339390000
P20700;E9PBF6;A0A0D9SFE5;A0A0D9SFY5	P20700;E9PBF6;A0A0D9SFE5	Lamin-B1	LMNB1	sp|P20700|LMNB1_HUMAN Lamin-B1 OS=Homo sapiens OX=9606 GN=LMNB1 PE=1 SV=2;tr|E9PBF6|E9PBF6_HUMAN Lamin-B1 OS=Homo sapiens OX=9606 GN=LMNB1 PE=1 SV=1;tr|A0A0D9SFE5|A0A0D9SFE5_HUMAN Lamin B1, isoform CRA_a OS=Homo sapiens OX=9606 GN=LMNB1 PE=1 SV=1	4	17	17	0	2	1	8	9	6	8	11	7	0	2	1	8	9	6	8	11	7	37	37	66.408	586	586;387;329;166	0	64.932	0	3.9	2.4	19.6	22.5	15.5	18.9	25.6	17.1	2252500000	0	7220700	1919900	310220000	346490000	202090000	474650000
Q7L576;A0A0G2JR96;A0A0G2JQT1;A0A0G2JQH3;A0A087WVZ5;H0YL50	Q7L576;A0A0G2JR96;A0A0G2JQT1	Cytoplasmic FMR1-interacting protein 1	CYFIP1	sp|Q7L576|CYFP1_HUMAN Cytoplasmic FMR1-interacting protein 1 OS=Homo sapiens OX=9606 GN=CYFIP1 PE=1 SV=1;tr|A0A0G2JR96|A0A0G2JR96_HUMAN Cytoplasmic FMR1-interacting protein 1 (Fragment) OS=Homo sapiens OX=9606 GN=CYFIP1 PE=1 SV=4;tr|A0A0G2JQT1|A0A0G2JQT1_H	6	23	14	0	1	1	11	8	7	12	11	14	0	0	0	5	5	4	7	7	9	21.8	13.9	145.18	1253	1253;862;862;185;185;176	0	64.803	0	0.9	0.9	10.2	7.6	6.3	11.5	10.4	13.6	1930200000	0	6821700	7089000	262540000	277570000	199430000	377500000
P29373;Q5SYZ4	P29373;Q5SYZ4	Cellular retinoic acid-binding protein 2	CRABP2	sp|P29373|RABP2_HUMAN Cellular retinoic acid-binding protein 2 OS=Homo sapiens OX=9606 GN=CRABP2 PE=1 SV=2;tr|Q5SYZ4|Q5SYZ4_HUMAN Cellular retinoic acid-binding protein 2 (Fragment) OS=Homo sapiens OX=9606 GN=CRABP2 PE=1 SV=1	2	4	4	1	0	0	3	3	2	4	4	3	1	0	0	3	3	2	4	4	3	43.5	43.5	15.693	138	138;82	0	64.778	11.6	0	0	33.3	28.3	16.7	43.5	43.5	28.3	796780000	6385900	0	0	14600000	68732000	22968000	302930000
P54578;A6NJA2;J3QQT6;J3KS55	P54578;A6NJA2	Ubiquitin carboxyl-terminal hydrolase 14;Ubiquitin carboxyl-terminal hydrolase	USP14	sp|P54578|UBP14_HUMAN Ubiquitin carboxyl-terminal hydrolase 14 OS=Homo sapiens OX=9606 GN=USP14 PE=1 SV=3;tr|A6NJA2|A6NJA2_HUMAN Ubiquitin carboxyl-terminal hydrolase OS=Homo sapiens OX=9606 GN=USP14 PE=1 SV=2	4	15	15	1	1	0	8	8	4	9	10	6	1	1	0	8	8	4	9	10	6	44.7	44.7	56.068	494	494;448;20;28	0	64.722	2.2	2.2	0	23.9	24.7	15.6	27.9	30	21.3	3506500000	9153600	3980300	0	480640000	690440000	130210000	741870000
P11177;C9J634;F8WF02	P11177;C9J634;F8WF02	Pyruvate dehydrogenase E1 component subunit beta, mitochondrial	PDHB	sp|P11177|ODPB_HUMAN Pyruvate dehydrogenase E1 component subunit beta, mitochondrial OS=Homo sapiens OX=9606 GN=PDHB PE=1 SV=3;tr|C9J634|C9J634_HUMAN Pyruvate dehydrogenase E1 component subunit beta OS=Homo sapiens OX=9606 GN=PDHB PE=1 SV=1;tr|F8WF02|F8WF0	3	8	8	0	1	0	4	3	5	5	4	6	0	1	0	4	3	5	5	4	6	33.7	33.7	39.233	359	359;350;251	0	64.343	0	4.5	0	16.4	12	19.5	19.8	16.4	27.3	1420200000	0	9558300	0	130850000	100160000	334840000	297260000
E7ETZ4;Q9Y6E2;B5MCH7;B5MCE7;Q75MG1;E9PFD4;E7EMS9;C9JF98;E9PFE3;F8WDX8	E7ETZ4;Q9Y6E2;B5MCH7;B5MCE7;Q75MG1;E9PFD4	Basic leucine zipper and W2 domain-containing protein 2	BZW2	tr|E7ETZ4|E7ETZ4_HUMAN Basic leucine zipper and W2 domain-containing protein 2 (Fragment) OS=Homo sapiens OX=9606 GN=BZW2 PE=1 SV=1;sp|Q9Y6E2|BZW2_HUMAN Basic leucine zipper and W2 domain-containing protein 2 OS=Homo sapiens OX=9606 GN=BZW2 PE=1 SV=1;tr|B5	10	16	14	0	0	0	13	11	11	12	13	13	0	0	0	12	10	10	11	12	11	37	33.6	46.913	408	408;419;343;225;274;189;208;162;161;170	0	64.257	0	0	0	28.9	27	27	27	28.9	33.1	19194000000	0	0	0	2810700000	2712100000	1941600000	3583500000
Q08554	Q08554	Desmocollin-1	DSC1	sp|Q08554|DSC1_HUMAN Desmocollin-1 OS=Homo sapiens OX=9606 GN=DSC1 PE=1 SV=2	1	13	13	7	8	12	5	5	5	3	5	5	7	8	12	5	5	5	3	5	5	21	21	99.986	894	894	0	64.148	9.2	11.3	19.8	7.8	7.3	7.3	4.5	7.2	7.3	2320100000	438970000	175850000	485220000	303220000	216350000	240760000	73716000
P26639;A2RTX5;D6R9F8;B7ZLP8;D6RCA5;D6RDJ6	P26639	Threonine--tRNA ligase, cytoplasmic	TARS	sp|P26639|SYTC_HUMAN Threonine--tRNA ligase 1, cytoplasmic OS=Homo sapiens OX=9606 GN=TARS1 PE=1 SV=3	6	20	20	3	4	2	13	12	12	12	10	14	3	4	2	13	12	12	12	10	14	38.5	38.5	83.434	723	723;802;129;766;118;131	0	64.137	4.6	6.2	3.2	26.6	23.8	23	24.2	18.9	29.7	3076100000	13740000	27255000	17000000	479770000	377110000	350840000	594050000
J3KQ48;Q9Y3E5	J3KQ48;Q9Y3E5	Peptidyl-tRNA hydrolase 2, mitochondrial	PTRH2	tr|J3KQ48|J3KQ48_HUMAN Peptidyl-tRNA hydrolase 2, mitochondrial OS=Homo sapiens OX=9606 GN=PTRH2 PE=1 SV=1;sp|Q9Y3E5|PTH2_HUMAN Peptidyl-tRNA hydrolase 2, mitochondrial OS=Homo sapiens OX=9606 GN=PTRH2 PE=1 SV=1	2	6	6	1	1	0	4	4	3	4	4	3	1	1	0	4	4	3	4	4	3	50.6	50.6	19.325	180	180;179	0	64.049	7.8	7.8	0	35	35	26.7	35	39.4	24.4	1371000000	796820	1663700	0	164050000	267320000	106210000	154920000
P61158;B4DXW1;F8WDR7;F8WEW2;F8WE84	P61158;B4DXW1	Actin-related protein 3	ACTR3	sp|P61158|ARP3_HUMAN Actin-related protein 3 OS=Homo sapiens OX=9606 GN=ACTR3 PE=1 SV=3;tr|B4DXW1|B4DXW1_HUMAN Actin-related protein 3 OS=Homo sapiens OX=9606 GN=ACTR3 PE=1 SV=1	5	16	16	4	3	4	11	11	12	14	13	13	4	3	4	11	11	12	14	13	13	56.9	56.9	47.371	418	418;367;84;34;41	0	63.901	16	11	15.8	45	42.3	46.4	50.5	45	50.5	7283100000	45473000	35054000	43265000	1016800000	1184100000	810010000	1738700000
E7EX73;E9PGM1;E7EUU4;Q04637;C9JF13;C9J6B6;C9K073;C9J2Z7;H7C0V6;H7C044	E7EX73;E9PGM1;E7EUU4;Q04637	Eukaryotic translation initiation factor 4 gamma 1	EIF4G1	tr|E7EX73|E7EX73_HUMAN Eukaryotic translation initiation factor 4 gamma 1 OS=Homo sapiens OX=9606 GN=EIF4G1 PE=1 SV=1;tr|E9PGM1|E9PGM1_HUMAN Eukaryotic translation initiation factor 4 gamma 1 OS=Homo sapiens OX=9606 GN=EIF4G1 PE=1 SV=1;tr|E7EUU4|E7EUU4_HUM	10	21	18	1	4	1	11	10	8	10	13	13	1	4	1	11	9	7	8	11	11	20.6	18.5	158.64	1436	1436;1513;1560;1599;903;757;869;833;180;226	0	63.584	0.8	4.8	0.8	10.9	10.9	9	10.1	12.2	14.1	4270000000	2697900	24405000	1932600	637590000	426390000	658430000	916400000
Q9UH99;B0QY64	Q9UH99	SUN domain-containing protein 2	SUN2	sp|Q9UH99|SUN2_HUMAN SUN domain-containing protein 2 OS=Homo sapiens OX=9606 GN=SUN2 PE=1 SV=3	2	7	7	0	0	0	4	3	1	4	5	4	0	0	0	4	3	1	4	5	4	17.9	17.9	80.31	717	717;228	0	63.15	0	0	0	8.9	7.4	4.6	12	13.7	7.9	452590000	0	0	0	64378000	45869000	0	103570000
H0YMZ1;H0YL69;P25789;H0YN18;H0YMA1;H0YKT8;H0YLC2;H0YMI6;H0YKS0;H0YLS6;H0YMV3	H0YMZ1;H0YL69;P25789;H0YN18;H0YMA1;H0YKT8;H0YLC2;H0YMI6	Proteasome subunit alpha type;Proteasome subunit alpha type-4;Proteasome subunit beta type	PSMA4	tr|H0YMZ1|H0YMZ1_HUMAN Proteasome subunit alpha type (Fragment) OS=Homo sapiens OX=9606 GN=PSMA4 PE=1 SV=8;tr|H0YL69|H0YL69_HUMAN Proteasome subunit alpha type (Fragment) OS=Homo sapiens OX=9606 GN=PSMA4 PE=1 SV=1;sp|P25789|PSA4_HUMAN Proteasome subunit al	11	8	8	4	3	2	6	8	6	6	5	5	4	3	2	6	8	6	6	5	5	46.4	46.4	24.526	220	220;236;261;230;209;181;174;183;122;125;86	0	63.056	28.6	15	7.7	42.3	46.4	38.6	38.6	38.6	31.4	3329300000	25478000	17004000	27099000	445750000	571470000	441200000	688520000
P18031;B4DSN5	P18031;B4DSN5	Tyrosine-protein phosphatase non-receptor type 1;Tyrosine-protein phosphatase non-receptor type	PTPN1	sp|P18031|PTN1_HUMAN Tyrosine-protein phosphatase non-receptor type 1 OS=Homo sapiens OX=9606 GN=PTPN1 PE=1 SV=1;tr|B4DSN5|B4DSN5_HUMAN Tyrosine-protein phosphatase non-receptor type OS=Homo sapiens OX=9606 GN=PTPN1 PE=1 SV=1	2	14	14	0	0	0	7	6	5	7	9	10	0	0	0	7	6	5	7	9	10	46.2	46.2	49.966	435	435;362	0	62.925	0	0	0	21.1	21.8	18.9	24.6	28.5	37.7	2936400000	0	0	0	373060000	386760000	229080000	664760000
Q9BXJ9;A0A0B4J1W3;Q6N069	Q9BXJ9;A0A0B4J1W3	N-alpha-acetyltransferase 15, NatA auxiliary subunit	NAA15	sp|Q9BXJ9|NAA15_HUMAN N-alpha-acetyltransferase 15, NatA auxiliary subunit OS=Homo sapiens OX=9606 GN=NAA15 PE=1 SV=1;tr|A0A0B4J1W3|A0A0B4J1W3_HUMAN N-alpha-acetyltransferase 15, NatA auxiliary subunit OS=Homo sapiens OX=9606 GN=NAA15 PE=1 SV=1	3	22	21	2	2	1	10	8	6	10	11	10	2	2	1	10	8	6	10	10	10	34.1	33.4	101.27	866	866;865;864	0	62.623	2.3	2.5	1.5	14.7	10.4	8.1	15.4	13.9	18.9	1759800000	2117900	6280300	0	278760000	267520000	95943000	359380000
P54886	P54886	Delta-1-pyrroline-5-carboxylate synthase;Glutamate 5-kinase;Gamma-glutamyl phosphate reductase	ALDH18A1	sp|P54886|P5CS_HUMAN Delta-1-pyrroline-5-carboxylate synthase OS=Homo sapiens OX=9606 GN=ALDH18A1 PE=1 SV=2	1	14	14	0	1	0	7	10	7	8	7	9	0	1	0	7	10	7	8	7	9	25.5	25.5	87.301	795	795	0	62.437	0	1.5	0	14.1	17.5	13.7	15	14.1	15.2	1711300000	0	3684900	0	199680000	294970000	196890000	335230000
Q9UGP8;A6PVC9	Q9UGP8	Translocation protein SEC63 homolog	SEC63	sp|Q9UGP8|SEC63_HUMAN Translocation protein SEC63 homolog OS=Homo sapiens OX=9606 GN=SEC63 PE=1 SV=2	2	21	21	0	0	1	12	10	10	15	14	14	0	0	1	12	10	10	15	14	14	34.9	34.9	87.996	760	760;161	0	62.202	0	0	1.4	25.4	19.3	17.9	26.6	27.2	23.8	2689600000	0	0	2382600	352490000	194880000	244350000	661220000
Q9NS69	Q9NS69	Mitochondrial import receptor subunit TOM22 homolog	TOMM22	sp|Q9NS69|TOM22_HUMAN Mitochondrial import receptor subunit TOM22 homolog OS=Homo sapiens OX=9606 GN=TOMM22 PE=1 SV=3	1	6	6	0	0	0	4	3	6	5	6	5	0	0	0	4	3	6	5	6	5	59.9	59.9	15.521	142	142	0	61.894	0	0	0	48.6	40.8	59.9	59.9	59.9	59.9	4843700000	0	0	0	510170000	493740000	610350000	971660000
P11940;A0A087WTT1;E7EQV3;E7ERJ7;H0YAR2;H0YBN4;E5RJB9;E5RGH3;E5RH24;H0YAP2;H0YB86;E5RHG7;Q4VXU2;E5RGC4;E5RFD8;H0YAS7;H0YAS6;H0YB75;E5RJM8;H0YC10;Q5JQF8;Q96DU9	P11940;A0A087WTT1;E7EQV3;E7ERJ7;H0YAR2	Polyadenylate-binding protein 1;Polyadenylate-binding protein	PABPC1	sp|P11940|PABP1_HUMAN Polyadenylate-binding protein 1 OS=Homo sapiens OX=9606 GN=PABPC1 PE=1 SV=2;tr|A0A087WTT1|A0A087WTT1_HUMAN Polyadenylate-binding protein OS=Homo sapiens OX=9606 GN=PABPC1 PE=1 SV=1;tr|E7EQV3|E7EQV3_HUMAN Polyadenylate-binding protein	22	21	8	3	1	1	10	10	9	12	13	11	1	0	0	3	4	2	4	4	2	44	20.1	70.67	636	636;522;591;604;284;174;129;108;118;131;165;75;614;43;61;136;169;183;38;42;200;382	0	61.452	6.9	2.7	2.7	24.2	22.6	17.9	31	33.3	21.1	4221700000	20263000	4612300	8540900	623130000	519500000	541000000	929130000
Q15084	Q15084	Protein disulfide-isomerase A6	PDIA6	sp|Q15084|PDIA6_HUMAN Protein disulfide-isomerase A6 OS=Homo sapiens OX=9606 GN=PDIA6 PE=1 SV=1	1	14	14	2	2	3	9	9	8	10	12	6	2	2	3	9	9	8	10	12	6	43.4	43.4	48.121	440	440	0	61.405	6.4	5.2	9.3	30.5	33.4	30	32.3	41.1	20.5	5508200000	60129000	7780600	41023000	484580000	1175500000	528080000	1238600000
Q14318;U3KQ64;U3KQI1;A0A0A0MTJ1;M0R2K9	Q14318;U3KQ64	Peptidyl-prolyl cis-trans isomerase FKBP8	FKBP8	sp|Q14318|FKBP8_HUMAN Peptidyl-prolyl cis-trans isomerase FKBP8 OS=Homo sapiens OX=9606 GN=FKBP8 PE=1 SV=2;tr|U3KQ64|U3KQ64_HUMAN Peptidyl-prolyl cis-trans isomerase FKBP8 (Fragment) OS=Homo sapiens OX=9606 GN=FKBP8 PE=1 SV=1	5	5	5	0	0	0	3	3	4	5	5	5	0	0	0	3	3	4	5	5	5	18.4	18.4	44.561	412	412;182;103;249;257	0	61.283	0	0	0	11.4	11.4	15	18.4	18.4	18.4	1329700000	0	0	0	193180000	185310000	105000000	402700000
Q08AM6;H3BUU8;H3BQD9;A0A087WT26;H3BN23	Q08AM6	Protein VAC14 homolog	VAC14	sp|Q08AM6|VAC14_HUMAN Protein VAC14 homolog OS=Homo sapiens OX=9606 GN=VAC14 PE=1 SV=1	5	14	14	0	0	0	8	10	3	10	9	9	0	0	0	8	10	3	10	9	9	28.9	28.9	87.972	782	782;201;260;185;40	0	61.084	0	0	0	15.9	22.1	5.1	22.5	16.9	16.2	1922200000	0	0	0	220830000	213850000	106940000	443130000
A0A494C0X2;A0A494C167;A0A494C045;Q9UHD2;A0A494C148;A0A494C0R4;A0A494C0A8;A0A494C1M6;A0A494C079;A0A494C1I2;F5GZI4;F5H206;F5H1A3	A0A494C0X2;A0A494C167;A0A494C045;Q9UHD2;A0A494C148;A0A494C0R4;A0A494C0A8;A0A494C1M6;A0A494C079	Serine/threonine-protein kinase TBK1	TBK1	tr|A0A494C0X2|A0A494C0X2_HUMAN Serine/threonine-protein kinase TBK1 OS=Homo sapiens OX=9606 GN=TBK1 PE=1 SV=1;tr|A0A494C167|A0A494C167_HUMAN Serine/threonine-protein kinase TBK1 OS=Homo sapiens OX=9606 GN=TBK1 PE=1 SV=1;tr|A0A494C045|A0A494C045_HUMAN Serin	13	17	17	0	0	0	0	0	0	11	16	8	0	0	0	0	0	0	11	16	8	38.4	38.4	73.8	643	643;677;731;729;705;542;551;575;519;240;48;98;103	0	61.032	0	0	0	0	0	0	23.3	36.4	16.3	1958300000	0	0	0	0	0	0	568550000
F8W6I7;P09651;F8VZ49;F8VTQ5;Q32P51;F8W646;A0A2R8Y4L2;F8VYN5;H0YH80	F8W6I7;P09651;F8VZ49;F8VTQ5;Q32P51;F8W646;A0A2R8Y4L2	Heterogeneous nuclear ribonucleoprotein A1;Heterogeneous nuclear ribonucleoprotein A1, N-terminally processed;Heterogeneous nuclear ribonucleoprotein A1-like 2	HNRNPA1;HNRNPA1L2	tr|F8W6I7|F8W6I7_HUMAN Heterogeneous nuclear ribonucleoprotein A1 OS=Homo sapiens OX=9606 GN=HNRNPA1 PE=1 SV=2;sp|P09651|ROA1_HUMAN Heterogeneous nuclear ribonucleoprotein A1 OS=Homo sapiens OX=9606 GN=HNRNPA1 PE=1 SV=5;tr|F8VZ49|F8VZ49_HUMAN Heterogeneous	9	11	11	2	2	3	7	4	4	4	7	9	2	2	3	7	4	4	4	7	9	39.4	39.4	33.155	307	307;372;231;145;320;156;275;113;191	0	60.958	10.4	8.8	13.7	30	16.9	20.8	16	31.9	30.6	4439600000	33329000	27721000	168290000	602300000	256320000	294000000	639810000
E9PK01;P29692;A0A087X1X7;E9PRY8;E9PPR1;E9PL12;E9PQ49;E9PI39;E9PQZ1;E9PMW7;E9PIZ1;H0YCK7;H0YE58;E9PK06;H0YE72;E9PQC9;E9PKK3;E9PK72;E9PNW6;E9PJD0	E9PK01;P29692;A0A087X1X7;E9PRY8;E9PPR1;E9PL12;E9PQ49;E9PI39;E9PQZ1;E9PMW7	Elongation factor 1-delta	EEF1D	tr|E9PK01|E9PK01_HUMAN Elongation factor 1-delta (Fragment) OS=Homo sapiens OX=9606 GN=EEF1D PE=1 SV=1;sp|P29692|EF1D_HUMAN Elongation factor 1-delta OS=Homo sapiens OX=9606 GN=EEF1D PE=1 SV=5;tr|A0A087X1X7|A0A087X1X7_HUMAN Elongation factor 1-delta OS=Hom	20	9	4	2	4	4	8	7	8	7	7	7	0	1	1	3	3	4	3	3	3	49.8	26.8	28.821	261	261;281;631;697;166;168;198;204;238;130;137;210;119;139;156;36;39;63;35;99	0	60.922	9.6	24.1	22.2	40.6	35.6	44.8	35.6	35.6	35.6	7866100000	18943000	35803000	53049000	1260700000	1134900000	1073700000	1576600000
A0A3B3IUB1;Q13144;A0A3B3ITG6;A0A3B3ISX3;A0A3B3IUF2;A0A3B3ISM8;A0A3B3IRP4;A0A3B3ITQ2;A0A3B3IS56;A0A3B3ISV1;A0A3B3IST9;A0A3B3ISI2;A0A3B3ISS1;C9JRD9;A0A3B3IT53;A0A3B3ITK8;H7C2X0	A0A3B3IUB1;Q13144;A0A3B3ITG6;A0A3B3ISX3	Translation initiation factor eIF-2B subunit epsilon	EIF2B5	tr|A0A3B3IUB1|A0A3B3IUB1_HUMAN Translation initiation factor eIF-2B subunit epsilon OS=Homo sapiens OX=9606 GN=EIF2B5 PE=1 SV=1;sp|Q13144|EI2BE_HUMAN Translation initiation factor eIF-2B subunit epsilon OS=Homo sapiens OX=9606 GN=EIF2B5 PE=1 SV=3;tr|A0A3B3	17	16	16	0	0	0	10	4	5	5	10	5	0	0	0	10	4	5	5	10	5	33.2	33.2	81.222	729	729;721;546;530;389;402;314;382;269;310;230;231;267;107;113;141;92	0	60.842	0	0	0	19.5	9.9	10.6	11.7	19.6	13.4	1853400000	0	0	0	354970000	249140000	232460000	256120000
P19367;B1AR62;Q2TB90;P52790	P19367	Hexokinase-1	HK1	sp|P19367|HXK1_HUMAN Hexokinase-1 OS=Homo sapiens OX=9606 GN=HK1 PE=1 SV=3	4	25	22	3	10	2	18	11	12	14	16	16	3	9	2	16	10	11	12	15	13	30.6	27.3	102.48	917	917;114;917;923	0	60.677	2.9	11.7	2.1	22.2	14.9	14.2	17.9	19.7	19.2	5525400000	26570000	141290000	14391000	738990000	623240000	760500000	1002300000
A0A1W2PPX5;A0A1W2PQR6;A0A1W2PQB7;A0A1W2PS43;A0A1W2PRS1;Q14108;A0A1W2PRF6;A0A1W2PPU6;D6RDG0;A0A1W2PS70;A0A1W2PNX7;A0A1W2PSE4	A0A1W2PPX5;A0A1W2PQR6;A0A1W2PQB7;A0A1W2PS43;A0A1W2PRS1;Q14108;A0A1W2PRF6;A0A1W2PPU6	Lysosome membrane protein 2	SCARB2	tr|A0A1W2PPX5|A0A1W2PPX5_HUMAN Lysosome membrane protein 2 OS=Homo sapiens OX=9606 GN=SCARB2 PE=1 SV=1;tr|A0A1W2PQR6|A0A1W2PQR6_HUMAN Lysosome membrane protein 2 OS=Homo sapiens OX=9606 GN=SCARB2 PE=1 SV=1;tr|A0A1W2PQB7|A0A1W2PQB7_HUMAN Lysosome membrane p	12	9	9	0	0	0	5	5	4	5	5	7	0	0	0	5	5	4	5	5	7	27.1	27.1	49.204	432	432;449;470;475;519;478;320;438;106;141;145;206	0	60.563	0	0	0	11.6	17.4	16.2	10.4	17.4	21.8	1932300000	0	0	0	221200000	213300000	199540000	256470000
P14324;A0A087WVN4;A0A087X1D8;A0A087X090;A0A087WTP2	P14324;A0A087WVN4;A0A087X1D8	Farnesyl pyrophosphate synthase	FDPS	sp|P14324|FPPS_HUMAN Farnesyl pyrophosphate synthase OS=Homo sapiens OX=9606 GN=FDPS PE=1 SV=4;tr|A0A087WVN4|A0A087WVN4_HUMAN Farnesyl pyrophosphate synthase (Fragment) OS=Homo sapiens OX=9606 GN=FDPS PE=1 SV=1;tr|A0A087X1D8|A0A087X1D8_HUMAN Farnesyl pyrop	5	9	9	1	0	0	4	4	4	6	3	5	1	0	0	4	4	4	6	3	5	27.7	27.7	48.275	419	419;274;174;248;80	0	60.477	4.3	0	0	12.9	13.1	16.2	18.6	10.7	19.6	2729800000	12282000	0	0	422630000	423370000	221240000	804610000
A0A087WYN9;Q7Z478	A0A087WYN9;Q7Z478	ATP-dependent RNA helicase DHX29	DHX29	tr|A0A087WYN9|A0A087WYN9_HUMAN ATP-dependent RNA helicase DHX29 OS=Homo sapiens OX=9606 GN=DHX29 PE=1 SV=1;sp|Q7Z478|DHX29_HUMAN ATP-dependent RNA helicase DHX29 OS=Homo sapiens OX=9606 GN=DHX29 PE=1 SV=2	2	11	11	0	0	0	7	6	5	6	8	5	0	0	0	7	6	5	6	8	5	12.5	12.5	155.29	1370	1370;1369	0	60.098	0	0	0	8.1	5.8	5	6.8	9.3	5.6	838230000	0	0	0	125760000	110030000	85992000	117850000
P09429;Q5T7C4;B2RPK0	P09429;Q5T7C4	High mobility group protein B1	HMGB1	sp|P09429|HMGB1_HUMAN High mobility group protein B1 OS=Homo sapiens OX=9606 GN=HMGB1 PE=1 SV=3;tr|Q5T7C4|Q5T7C4_HUMAN High mobility group protein B1 OS=Homo sapiens OX=9606 GN=HMGB1 PE=1 SV=1	3	11	9	2	1	1	6	7	7	7	6	9	1	1	1	5	6	6	6	6	8	40	30.2	24.893	215	215;158;211	0	60.043	11.2	7	7	28.4	28.4	28.4	28.4	22.8	35.8	6940700000	62340000	10434000	41846000	993490000	1343800000	682790000	1490200000
P20340;F5H3K7;F5GX61;C9J0I2	P20340;F5H3K7	Ras-related protein Rab-6A	RAB6A	sp|P20340|RAB6A_HUMAN Ras-related protein Rab-6A OS=Homo sapiens OX=9606 GN=RAB6A PE=1 SV=3;tr|F5H3K7|F5H3K7_HUMAN Ras-related protein Rab-6A (Fragment) OS=Homo sapiens OX=9606 GN=RAB6A PE=1 SV=1	4	5	3	2	1	2	2	1	3	2	2	2	1	0	1	1	0	1	0	1	0	33.7	23.1	23.593	208	208;71;87;71	0	60.028	15.9	5.3	15.9	12	5.3	17.3	10.6	11.1	10.6	5273200000	61388000	89130000	92818000	546900000	676190000	753570000	867750000
Q8WVM8;G3V4I1;G3V5F3;J3KNG4;G3V3K9;G3V363;H0YJS6;G3V2M8	Q8WVM8	Sec1 family domain-containing protein 1	SCFD1	sp|Q8WVM8|SCFD1_HUMAN Sec1 family domain-containing protein 1 OS=Homo sapiens OX=9606 GN=SCFD1 PE=1 SV=4	8	9	9	0	0	0	3	5	1	5	5	5	0	0	0	3	5	1	5	5	5	22.7	22.7	72.379	642	642;75;121;163;48;92;102;198	0	60.025	0	0	0	7.5	12	3	12.5	12.8	13.7	849890000	0	0	0	99440000	124700000	0	249640000
Q9Y2V7;H0YGX8	Q9Y2V7	Conserved oligomeric Golgi complex subunit 6	COG6	sp|Q9Y2V7|COG6_HUMAN Conserved oligomeric Golgi complex subunit 6 OS=Homo sapiens OX=9606 GN=COG6 PE=1 SV=2	2	14	14	0	0	0	7	4	6	7	6	7	0	0	0	7	4	6	7	6	7	39	39	73.278	657	657;134	0	59.757	0	0	0	19.5	10.4	19	20.2	15.1	17.2	1255300000	0	0	0	218550000	116980000	187570000	294260000
Q5TCU3;A7XZE4;P07951;H0YKX5;H0YKP3;A0A0S2Z4G6;Q6ZN40;P09493;H0YL80;U3KQK2	Q5TCU3;A7XZE4;P07951	Tropomyosin beta chain	TPM2;TPM2b	tr|Q5TCU3|Q5TCU3_HUMAN Tropomyosin beta chain OS=Homo sapiens OX=9606 GN=TPM2 PE=1 SV=1;tr|A7XZE4|A7XZE4_HUMAN Beta tropomyosin isoform OS=Homo sapiens OX=9606 GN=TPM2 PE=1 SV=1;sp|P07951|TPM2_HUMAN Tropomyosin beta chain OS=Homo sapiens OX=9606 GN=TPM2 PE	10	15	10	3	2	4	7	10	7	10	9	8	1	1	0	3	5	3	5	4	4	45.4	36.6	32.814	284	284;284;284;142;157;284;326;284;68;111	0	59.741	10.2	8.1	8.8	16.9	26.8	18.7	24.3	26.8	23.6	1280000000	1311900	0	9849600	208690000	188570000	121570000	248400000
P07996;A8MZG1;A0A3B3ITK0;P35442	P07996	Thrombospondin-1	THBS1	sp|P07996|TSP1_HUMAN Thrombospondin-1 OS=Homo sapiens OX=9606 GN=THBS1 PE=1 SV=2	4	15	15	0	0	0	11	8	7	9	11	9	0	0	0	11	8	7	9	11	9	17.6	17.6	129.38	1170	1170;94;1177;1172	0	59.725	0	0	0	12.8	8.9	8.8	11.5	13.8	11.8	2074500000	0	0	0	440160000	356120000	197280000	351620000
P33993;C9J8M6	P33993	DNA replication licensing factor MCM7	MCM7	sp|P33993|MCM7_HUMAN DNA replication licensing factor MCM7 OS=Homo sapiens OX=9606 GN=MCM7 PE=1 SV=4	2	21	21	0	0	0	12	8	11	10	15	13	0	0	0	12	8	11	10	15	13	41.7	41.7	81.307	719	719;183	0	59.711	0	0	0	23.4	14.3	20.4	20.2	31.6	25.3	1916600000	0	0	0	295040000	211210000	212630000	412220000
Q9UNM6;J3KNQ3;A0A087WUL9;E9PL38;H0YD73;E9PQG3;E9PPD2;F8W8J6	Q9UNM6;J3KNQ3;A0A087WUL9;E9PL38;H0YD73	26S proteasome non-ATPase regulatory subunit 13	PSMD13	sp|Q9UNM6|PSD13_HUMAN 26S proteasome non-ATPase regulatory subunit 13 OS=Homo sapiens OX=9606 GN=PSMD13 PE=1 SV=2;tr|J3KNQ3|J3KNQ3_HUMAN 26S proteasome non-ATPase regulatory subunit 13 OS=Homo sapiens OX=9606 GN=PSMD13 PE=1 SV=1;tr|A0A087WUL9|A0A087WUL9_HU	8	16	16	0	1	1	6	8	5	7	10	9	0	1	1	6	8	5	7	10	9	53.2	53.2	42.945	376	376;349;377;263;221;113;70;72	0	59.611	0	2.7	2.7	18.4	28.2	18.6	22.6	36.7	34.8	2014700000	0	1977800	10837000	227310000	230760000	186390000	293900000
O43264;F5H3C1	O43264	Centromere/kinetochore protein zw10 homolog	ZW10	sp|O43264|ZW10_HUMAN Centromere/kinetochore protein zw10 homolog OS=Homo sapiens OX=9606 GN=ZW10 PE=1 SV=3	2	13	13	0	0	0	7	9	5	10	11	7	0	0	0	7	9	5	10	11	7	24.8	24.8	88.828	779	779;135	0	59.453	0	0	0	12.7	18	9.5	18.9	20.7	13.1	1338700000	0	0	0	164780000	183680000	80495000	363120000
P63261;I3L3I0;I3L1U9;I3L4N8;I3L3R2;J3KT65;K7EM38	P63261;I3L3I0;I3L1U9	Actin, cytoplasmic 2;Actin, cytoplasmic 2, N-terminally processed	ACTG1	sp|P63261|ACTG_HUMAN Actin, cytoplasmic 2 OS=Homo sapiens OX=9606 GN=ACTG1 PE=1 SV=1;tr|I3L3I0|I3L3I0_HUMAN Actin, cytoplasmic 2 (Fragment) OS=Homo sapiens OX=9606 GN=ACTG1 PE=1 SV=1;tr|I3L1U9|I3L1U9_HUMAN Actin, cytoplasmic 2 (Fragment) OS=Homo sapiens OX	7	31	1	18	16	18	24	29	26	29	26	29	1	1	1	1	1	1	1	1	1	78.4	4.5	41.792	375	375;214;214;241;164;198;133	0	59.429	63.5	60.3	64	69.6	77.6	74.4	75.2	72.8	77.9	13593000000	238870000	270860000	323050000	2343000000	2135500000	1169100000	2830900000
Q9UBF2	Q9UBF2	Coatomer subunit gamma-2	COPG2	sp|Q9UBF2|COPG2_HUMAN Coatomer subunit gamma-2 OS=Homo sapiens OX=9606 GN=COPG2 PE=1 SV=1	1	20	18	0	0	0	14	12	7	8	9	8	0	0	0	13	10	6	6	7	7	37.4	34.6	97.621	871	871	0	59.243	0	0	0	26.5	20.1	14.5	14.8	15.4	15.6	1428400000	0	0	0	342800000	209340000	89289000	236190000
Q99733;C9JZI7;E9PNW0;E9PJJ2;E9PS34;E9PNJ7;C9J6D1;E9PP22;A8MXH2;E9PKT8;E9PKI2;H0YCI4;C9J1B1	Q99733;C9JZI7;E9PNW0;E9PJJ2;E9PS34;E9PNJ7;C9J6D1;E9PP22;A8MXH2;E9PKT8	Nucleosome assembly protein 1-like 4	NAP1L4	sp|Q99733|NP1L4_HUMAN Nucleosome assembly protein 1-like 4 OS=Homo sapiens OX=9606 GN=NAP1L4 PE=1 SV=1;tr|C9JZI7|C9JZI7_HUMAN Nucleosome assembly protein 1-like 4 (Fragment) OS=Homo sapiens OX=9606 GN=NAP1L4 PE=1 SV=1;tr|E9PNW0|E9PNW0_HUMAN Nucleosome asse	13	8	6	0	1	0	5	5	5	6	5	5	0	1	0	4	3	3	4	4	4	34.1	31.2	42.823	375	375;278;107;128;133;140;178;154;156;169;78;204;101	0	59.083	0	4.8	0	21.9	19.5	19.5	24.3	21.9	26.4	742400000	0	1854400	0	171320000	73076000	81496000	85749000
J3KR44;Q96FW1;F5GYN4;F5H6Q1;F5GYJ8;F5H3F0	J3KR44;Q96FW1;F5GYN4;F5H6Q1;F5GYJ8;F5H3F0	Ubiquitin thioesterase OTUB1	OTUB1	tr|J3KR44|J3KR44_HUMAN Ubiquitin thioesterase OS=Homo sapiens OX=9606 GN=OTUB1 PE=1 SV=2;sp|Q96FW1|OTUB1_HUMAN Ubiquitin thioesterase OTUB1 OS=Homo sapiens OX=9606 GN=OTUB1 PE=1 SV=2;tr|F5GYN4|F5GYN4_HUMAN Ubiquitin thioesterase OTUB1 OS=Homo sapiens OX=96	6	9	9	1	3	0	7	6	6	7	6	8	1	3	0	7	6	6	7	6	8	47.4	47.4	31.44	272	272;271;241;280;286;170	0	59.023	3.3	13.2	0	34.9	25.4	25.7	34.9	25.4	37.9	2462100000	5680700	19986000	0	371000000	310890000	376920000	355040000
P52209;K7EM49;K7EMN2;K7EPF6;K7ELN9	P52209;K7EM49	6-phosphogluconate dehydrogenase, decarboxylating	PGD	sp|P52209|6PGD_HUMAN 6-phosphogluconate dehydrogenase, decarboxylating OS=Homo sapiens OX=9606 GN=PGD PE=1 SV=3;tr|K7EM49|K7EM49_HUMAN 6-phosphogluconate dehydrogenase, decarboxylating (Fragment) OS=Homo sapiens OX=9606 GN=PGD PE=1 SV=1	5	16	16	2	3	3	10	8	6	10	8	10	2	3	3	10	8	6	10	8	10	46.2	46.2	53.139	483	483;205;160;256;224	0	58.94	5.8	9.9	10.1	32.5	27.3	19.7	29.4	21.9	32.9	5352300000	28830000	21049000	36936000	756880000	846650000	431950000	1242700000
Q15067;K7ELT1;I3L0T4;I3L2U4	Q15067	Peroxisomal acyl-coenzyme A oxidase 1	ACOX1	sp|Q15067|ACOX1_HUMAN Peroxisomal acyl-coenzyme A oxidase 1 OS=Homo sapiens OX=9606 GN=ACOX1 PE=1 SV=3	4	8	8	0	0	0	4	3	3	5	6	5	0	0	0	4	3	3	5	6	5	24.4	24.4	74.423	660	660;156;223;71	0	58.47	0	0	0	13.8	9.4	10.9	15.8	19.5	16.2	1589900000	0	0	0	230180000	179050000	143610000	263320000
F8W930;Q9Y6M1	F8W930;Q9Y6M1	Insulin-like growth factor 2 mRNA-binding protein 2	IGF2BP2	tr|F8W930|F8W930_HUMAN Insulin-like growth factor 2 mRNA-binding protein 2 OS=Homo sapiens OX=9606 GN=IGF2BP2 PE=1 SV=1;sp|Q9Y6M1|IF2B2_HUMAN Insulin-like growth factor 2 mRNA-binding protein 2 OS=Homo sapiens OX=9606 GN=IGF2BP2 PE=1 SV=2	2	13	11	1	1	1	10	10	8	8	12	9	0	0	0	8	9	7	7	10	8	29.1	25.3	66.785	605	605;599	0	58.367	2.1	2.1	2.1	22.5	23.5	18.3	18.7	26.9	21.3	2036800000	0	0	0	279410000	381640000	224650000	353090000
P62072	P62072	Mitochondrial import inner membrane translocase subunit Tim10	TIMM10	sp|P62072|TIM10_HUMAN Mitochondrial import inner membrane translocase subunit Tim10 OS=Homo sapiens OX=9606 GN=TIMM10 PE=1 SV=1	1	4	4	0	0	0	1	2	1	2	2	2	0	0	0	1	2	1	2	2	2	32.2	32.2	10.333	90	90	0	58.22	0	0	0	15.6	30	15.6	31.1	32.2	32.2	971050000	0	0	0	132800000	155890000	140380000	72746000
P46060;H0Y4Q3;B0QYT5;B0QYT4	P46060	Ran GTPase-activating protein 1	RANGAP1	sp|P46060|RAGP1_HUMAN Ran GTPase-activating protein 1 OS=Homo sapiens OX=9606 GN=RANGAP1 PE=1 SV=1	4	16	16	1	0	0	9	10	6	11	13	7	1	0	0	9	10	6	11	13	7	35.4	35.4	63.541	587	587;253;100;133	0	58.123	2	0	0	24.7	26.6	17.5	27.3	29.8	16.4	1995800000	4829200	0	0	197100000	283010000	186620000	426200000
Q9Y3A5;A0A087X020;F8WE72	Q9Y3A5;A0A087X020	Ribosome maturation protein SBDS	SBDS	sp|Q9Y3A5|SBDS_HUMAN Ribosome maturation protein SBDS OS=Homo sapiens OX=9606 GN=SBDS PE=1 SV=4;tr|A0A087X020|A0A087X020_HUMAN Ribosome maturation protein SBDS OS=Homo sapiens OX=9606 GN=SBDS PE=1 SV=1	3	5	5	0	0	0	3	0	0	3	3	2	0	0	0	3	0	0	3	3	2	32.8	32.8	28.763	250	250;250;86	0	58.04	0	0	0	21.6	0	0	20.4	25.2	16	276390000	0	0	0	65913000	0	0	117630000
P23526	P23526	Adenosylhomocysteinase	AHCY	sp|P23526|SAHH_HUMAN Adenosylhomocysteinase OS=Homo sapiens OX=9606 GN=AHCY PE=1 SV=4	1	14	14	4	3	4	10	12	8	10	12	12	4	3	4	10	12	8	10	12	12	37.5	37.5	47.716	432	432	0	57.89	12	8.3	11.3	26.6	31	23.6	26.2	30.6	33.1	10726000000	106670000	24140000	78546000	1547200000	1634800000	1109800000	1663300000
Q96JB5;J3QRM1;J3QQY1;J3QL86;J3KRK4;J3KS63;J3QS62;J3KRI2;J3KTA5;J3QL95	Q96JB5;J3QRM1;J3QQY1	CDK5 regulatory subunit-associated protein 3	CDK5RAP3	sp|Q96JB5|CK5P3_HUMAN CDK5 regulatory subunit-associated protein 3 OS=Homo sapiens OX=9606 GN=CDK5RAP3 PE=1 SV=2;tr|J3QRM1|J3QRM1_HUMAN CDK5 regulatory subunit-associated protein 3 (Fragment) OS=Homo sapiens OX=9606 GN=CDK5RAP3 PE=1 SV=1;tr|J3QQY1|J3QQY1_H	10	14	14	0	0	0	8	6	7	5	7	7	0	0	0	8	6	7	5	7	7	30.8	30.8	56.92	506	506;272;281;123;118;124;196;105;64;103	0	57.323	0	0	0	21.5	17.6	19.8	15.6	19.6	19.6	5842200000	0	0	0	1219100000	754350000	676770000	1120800000
P54136;E5RJM9;E5RH09;E5RI24	P54136	Arginine--tRNA ligase, cytoplasmic	RARS	sp|P54136|SYRC_HUMAN Arginine--tRNA ligase, cytoplasmic OS=Homo sapiens OX=9606 GN=RARS1 PE=1 SV=2	4	24	24	3	3	2	13	13	10	16	17	14	3	3	2	13	13	10	16	17	14	43	43	75.378	660	660;129;113;58	0	56.878	7.6	5.8	3.2	25.8	26.5	19.8	31.5	31.7	25.6	3983700000	25067000	11226000	34154000	482570000	532050000	307710000	1023400000
Q9BRR6;H3BRS6;H3BU35;H3BTH4;H3BN66	Q9BRR6;H3BRS6	ADP-dependent glucokinase	ADPGK	sp|Q9BRR6|ADPGK_HUMAN ADP-dependent glucokinase OS=Homo sapiens OX=9606 GN=ADPGK PE=1 SV=1;tr|H3BRS6|H3BRS6_HUMAN ADP-dependent glucokinase (Fragment) OS=Homo sapiens OX=9606 GN=ADPGK PE=1 SV=1	5	12	12	0	0	0	4	3	4	4	4	8	0	0	0	4	3	4	4	4	8	37.2	37.2	54.088	497	497;204;154;57;113	0	56.607	0	0	0	13.7	10.5	11.5	12.5	13.7	27.6	1576100000	0	0	0	204360000	132550000	108380000	243010000
A0A087WWU8;D6R904;A0A494C0G0;Q5VU61	A0A087WWU8;D6R904		TPM3	tr|A0A087WWU8|A0A087WWU8_HUMAN Tropomyosin alpha-3 chain OS=Homo sapiens OX=9606 GN=TPM3 PE=1 SV=1;tr|D6R904|D6R904_HUMAN Tropomyosin alpha-3 chain OS=Homo sapiens OX=9606 GN=TPM3 PE=1 SV=1	4	18	9	4	3	5	8	9	12	10	14	11	1	1	2	4	4	5	4	7	3	48.5	19.4	26.42	227	227;95;87;49	0	56.408	18.9	15	19.4	29.1	35.2	36.6	37.4	48.5	42.3	4810300000	61526000	24256000	65379000	641770000	532020000	759280000	841750000
Q9UHB9	Q9UHB9	Signal recognition particle subunit SRP68	SRP68	sp|Q9UHB9|SRP68_HUMAN Signal recognition particle subunit SRP68 OS=Homo sapiens OX=9606 GN=SRP68 PE=1 SV=2	1	13	13	1	1	1	10	6	6	8	10	7	1	1	1	10	6	6	8	10	7	27.6	27.6	70.729	627	627	0	56.396	1.4	2.1	2.1	20.7	12.9	13.1	14.4	22.3	16.4	2056800000	1602100	2561200	4170000	417120000	138500000	178440000	520050000
P61586	P61586	Transforming protein RhoA	RHOA	sp|P61586|RHOA_HUMAN Transforming protein RhoA OS=Homo sapiens OX=9606 GN=RHOA PE=1 SV=1	1	9	1	3	1	3	7	5	5	6	6	7	1	1	1	1	1	1	1	1	1	56	6.2	21.768	193	193	0	56.337	16.1	6.2	19.2	37.3	43.5	43.5	36.8	47.7	51.3	4589900000	52869000	10786000	42501000	829440000	438490000	330990000	811100000
Q96S66;Q5T1P5	Q96S66	Chloride channel CLIC-like protein 1	CLCC1	sp|Q96S66|CLCC1_HUMAN Chloride channel CLIC-like protein 1 OS=Homo sapiens OX=9606 GN=CLCC1 PE=1 SV=1	2	8	8	0	0	0	5	4	2	3	7	3	0	0	0	5	4	2	3	7	3	24	24	62.022	551	551;262	0	56.278	0	0	0	15.8	12.7	5.1	10.5	18.5	10.5	485360000	0	0	0	74673000	27299000	20677000	96070000
O94874	O94874	E3 UFM1-protein ligase 1	UFL1	sp|O94874|UFL1_HUMAN E3 UFM1-protein ligase 1 OS=Homo sapiens OX=9606 GN=UFL1 PE=1 SV=2	1	21	21	0	0	0	16	9	11	10	15	12	0	0	0	16	9	11	10	15	12	32.6	32.6	89.594	794	794	0	56.274	0	0	0	23.7	14.6	20	17.9	23.7	19.3	4022400000	0	0	0	723090000	427220000	318320000	652490000
Q9Y3I0	Q9Y3I0	tRNA-splicing ligase RtcB homolog	RTCB	sp|Q9Y3I0|RTCB_HUMAN RNA-splicing ligase RtcB homolog OS=Homo sapiens OX=9606 GN=RTCB PE=1 SV=1	1	14	14	2	2	1	12	12	8	12	11	8	2	2	1	12	12	8	12	11	8	36	36	55.21	505	505	0	56.236	8.5	4.4	2.6	27.9	31.5	22.8	29.3	25.7	21.2	3206400000	12715000	3389500	2827900	471730000	553150000	342250000	819140000
P49792;F8WBP7	P49792	E3 SUMO-protein ligase RanBP2	RANBP2	sp|P49792|RBP2_HUMAN E3 SUMO-protein ligase RanBP2 OS=Homo sapiens OX=9606 GN=RANBP2 PE=1 SV=2	2	23	15	0	0	0	13	12	9	12	14	9	0	0	0	9	9	8	9	10	7	12.1	8.6	358.2	3224	3224;51	0	56.153	0	0	0	6.8	5.9	4.3	5.9	7	5.1	1280600000	0	0	0	253200000	152030000	147130000	307070000
Q1KMD3;H3BQZ7	Q1KMD3;H3BQZ7	Heterogeneous nuclear ribonucleoprotein U-like protein 2	HNRNPUL2;HNRNPUL2-BSCL2	sp|Q1KMD3|HNRL2_HUMAN Heterogeneous nuclear ribonucleoprotein U-like protein 2 OS=Homo sapiens OX=9606 GN=HNRNPUL2 PE=1 SV=1;tr|H3BQZ7|H3BQZ7_HUMAN HCG2044799 OS=Homo sapiens OX=9606 GN=HNRNPUL2-BSCL2 PE=4 SV=1	2	14	14	0	2	1	9	5	5	7	7	4	0	2	1	9	5	5	7	7	4	28.4	28.4	85.104	747	747;746	0	56.006	0	3.1	2	19.3	9.9	10	14.9	12.3	9	1083400000	0	0	1691000	217930000	147180000	62780000	229310000
A0A2R8Y811;P62263;E5RH77	A0A2R8Y811;P62263;E5RH77	40S ribosomal protein S14	RPS14	tr|A0A2R8Y811|A0A2R8Y811_HUMAN 40S ribosomal protein S14 (Fragment) OS=Homo sapiens OX=9606 GN=RPS14 PE=1 SV=1;sp|P62263|RS14_HUMAN 40S ribosomal protein S14 OS=Homo sapiens OX=9606 GN=RPS14 PE=1 SV=3;tr|E5RH77|E5RH77_HUMAN 40S ribosomal protein S14 OS=Hom	3	9	9	5	4	4	5	5	5	5	7	6	5	4	4	5	5	5	5	7	6	42	42	16.159	150	150;151;134	0	55.885	32	30.7	24.7	31.3	31.3	31.3	31.3	33.3	32.7	8341600000	131100000	85558000	117230000	1063500000	1258500000	1094600000	1672000000
Q15645;H0YAL2	Q15645	Pachytene checkpoint protein 2 homolog	TRIP13	sp|Q15645|PCH2_HUMAN Pachytene checkpoint protein 2 homolog OS=Homo sapiens OX=9606 GN=TRIP13 PE=1 SV=2	2	17	17	0	0	0	13	10	8	11	11	11	0	0	0	13	10	8	11	11	11	46.3	46.3	48.55	432	432;249	0	55.636	0	0	0	35.9	29.2	23.4	31.2	32.2	35	6386700000	0	0	0	1029700000	661400000	448020000	1386500000
Q8WVC2;P63220;Q9BYK1;Q9BYK2	Q8WVC2;P63220;Q9BYK1	40S ribosomal protein S21	RPS21	tr|Q8WVC2|Q8WVC2_HUMAN 40S ribosomal protein S21 OS=Homo sapiens OX=9606 GN=RPS21 PE=1 SV=1;sp|P63220|RS21_HUMAN 40S ribosomal protein S21 OS=Homo sapiens OX=9606 GN=RPS21 PE=1 SV=1;tr|Q9BYK1|Q9BYK1_HUMAN 40S ribosomal protein S21 OS=Homo sapiens OX=9606 G	4	5	5	0	2	0	4	4	3	4	5	4	0	2	0	4	4	3	4	5	4	64.2	64.2	8.85	81	81;83;90;66	0	55.439	0	30.9	0	51.9	51.9	46.9	51.9	64.2	51.9	1537300000	0	13604000	0	172600000	110610000	152090000	294240000
Q6NUQ4;H7C0H8;H7C085;H7C008;H7BZI0	Q6NUQ4;H7C0H8	Transmembrane protein 214	TMEM214	sp|Q6NUQ4|TM214_HUMAN Transmembrane protein 214 OS=Homo sapiens OX=9606 GN=TMEM214 PE=1 SV=2;tr|H7C0H8|H7C0H8_HUMAN Transmembrane protein 214 OS=Homo sapiens OX=9606 GN=TMEM214 PE=1 SV=2	5	19	19	0	0	0	11	13	13	13	13	12	0	0	0	11	13	13	13	13	12	33.8	33.8	77.15	689	689;387;247;306;140	0	55.338	0	0	0	17.1	23.4	26.7	23.8	23.4	22.9	6442200000	0	0	0	768050000	743750000	556550000	1552600000
Q96CS3;D6RBG6	Q96CS3	FAS-associated factor 2	FAF2	sp|Q96CS3|FAF2_HUMAN FAS-associated factor 2 OS=Homo sapiens OX=9606 GN=FAF2 PE=1 SV=2	2	10	10	0	1	0	5	5	5	7	6	7	0	1	0	5	5	5	7	6	7	34.4	34.4	52.623	445	445;48	0	55.295	0	2.7	0	16.4	16.6	20.2	20.7	22.7	24.3	1569100000	0	890910	0	133970000	179200000	159730000	353680000
Q12797;E5RHK2;A0A087WW51;E5RG29;E5RG56;E5RHJ2;G3XAN5;A0A087WUJ2	Q12797	Aspartyl/asparaginyl beta-hydroxylase	ASPH	sp|Q12797|ASPH_HUMAN Aspartyl/asparaginyl beta-hydroxylase OS=Homo sapiens OX=9606 GN=ASPH PE=1 SV=3	8	15	15	1	1	1	8	6	5	6	12	11	1	1	1	8	6	5	6	12	11	26.9	26.9	85.862	758	758;136;195;198;327;113;174;186	0	55.287	2.4	2.4	2.4	18.6	14.4	10.2	15.2	21.8	24	4015800000	0	6333900	4237300	522660000	467170000	342550000	851770000
Q96A65	Q96A65	Exocyst complex component 4	EXOC4	sp|Q96A65|EXOC4_HUMAN Exocyst complex component 4 OS=Homo sapiens OX=9606 GN=EXOC4 PE=1 SV=1	1	10	10	0	0	0	4	5	7	8	8	7	0	0	0	4	5	7	8	8	7	16.2	16.2	110.5	974	974	0	55.271	0	0	0	6	7.9	11.1	13.4	12.3	11.3	1192000000	0	0	0	138460000	132370000	111280000	278140000
P50748;E7ES84;J3KQF2;F5H5V0	P50748	Kinetochore-associated protein 1	KNTC1	sp|P50748|KNTC1_HUMAN Kinetochore-associated protein 1 OS=Homo sapiens OX=9606 GN=KNTC1 PE=1 SV=1	4	27	27	0	0	0	23	11	10	13	15	14	0	0	0	23	11	10	13	15	14	16.4	16.4	250.75	2209	2209;1134;104;130	0	55.263	0	0	0	14.2	6.2	6.5	7.2	8.4	8.8	2941400000	0	0	0	650380000	362060000	290050000	506490000
P09543;K7EN66;C9K0L8;K7ERZ0;K7ERC4	P09543	2,3-cyclic-nucleotide 3-phosphodiesterase	CNP	sp|P09543|CN37_HUMAN 2,3-cyclic-nucleotide 3-phosphodiesterase OS=Homo sapiens OX=9606 GN=CNP PE=1 SV=2	5	12	12	0	1	0	4	5	6	6	7	7	0	1	0	4	5	6	6	7	7	24.5	24.5	47.578	421	421;120;144;153;164	0	55.235	0	2.1	0	14.5	16.4	17.8	14.5	15.9	18.3	1885700000	0	4976200	0	183130000	319940000	170690000	408810000
A0A5F9ZHM9;A0A5F9ZH21;Q9UQM7;A0A5F9ZHR5;A0A5K1VW76;D6RFJ0;A0A5F9ZHY2;A0A5F9ZH50;A0A5F9ZH90	A0A5F9ZHM9;A0A5F9ZH21;Q9UQM7;A0A5F9ZHR5;A0A5K1VW76;D6RFJ0;A0A5F9ZHY2;A0A5F9ZH50	Calcium/calmodulin-dependent protein kinase type II subunit alpha	CAMK2A	tr|A0A5F9ZHM9|A0A5F9ZHM9_HUMAN Calcium/calmodulin-dependent protein kinase type II subunit alpha OS=Homo sapiens OX=9606 GN=CAMK2A PE=1 SV=1;tr|A0A5F9ZH21|A0A5F9ZH21_HUMAN Calcium/calmodulin-dependent protein kinase type II subunit alpha OS=Homo sapiens OX	9	14	10	5	9	2	5	4	9	4	4	10	3	6	2	2	3	6	2	2	7	46.9	31.5	53.039	467	467;478;478;489;421;548;362;559;287	0	55.226	16.1	27.6	6.6	14.3	14.8	29.6	11.8	12	36.6	3859100000	93285000	267360000	57115000	272700000	136060000	884700000	230670000
P31150;G5E9U5	P31150	Rab GDP dissociation inhibitor alpha	GDI1	sp|P31150|GDIA_HUMAN Rab GDP dissociation inhibitor alpha OS=Homo sapiens OX=9606 GN=GDI1 PE=1 SV=2	2	24	15	7	9	7	13	12	15	12	17	18	3	7	4	7	6	8	6	11	10	63.1	40.9	50.582	447	447;147	0	55.136	21.7	31.8	26.2	44.7	40.5	49.7	40.3	52.8	57.7	2434600000	10847000	21979000	63624000	285360000	293090000	306610000	312690000
D6REM6;A0A0R4J2E8;A8MXP9;P43243;D6R991;H0Y8T4;B3KM87;D6RAM9;D6RAY2;D6R8Z5;D6RBI2;D6RBK5;D6RE02;D6RIA2	D6REM6;A0A0R4J2E8;A8MXP9;P43243;D6R991	Matrin-3	MATR3	tr|D6REM6|D6REM6_HUMAN Matrin-3 OS=Homo sapiens OX=9606 GN=MATR3 PE=1 SV=1;tr|A0A0R4J2E8|A0A0R4J2E8_HUMAN Matrin-3 OS=Homo sapiens OX=9606 GN=MATR3 PE=1 SV=1;tr|A8MXP9|A8MXP9_HUMAN Matrin-3 OS=Homo sapiens OX=9606 GN=MATR3 PE=1 SV=1;sp|P43243|MATR3_HUMAN M	14	9	9	0	1	0	8	5	6	5	5	5	0	1	0	8	5	6	5	5	5	13.1	13.1	88.358	794	794;847;895;847;433;334;509;81;86;107;109;121;124;172	0	55.098	0	1.3	0	11.8	8.1	10.5	8.1	8.1	8.1	1310800000	0	935490	0	234730000	243220000	161970000	287310000
E9PF19;Q9Y4P3;Q96E41;A0A087WXC6	E9PF19;Q9Y4P3;Q96E41	Transducin beta-like protein 2	TBL2	tr|E9PF19|E9PF19_HUMAN Transducin beta-like protein 2 OS=Homo sapiens OX=9606 GN=TBL2 PE=1 SV=1;sp|Q9Y4P3|TBL2_HUMAN Transducin beta-like protein 2 OS=Homo sapiens OX=9606 GN=TBL2 PE=1 SV=1;tr|Q96E41|Q96E41_HUMAN TBL2 protein OS=Homo sapiens OX=9606 GN=TBL	4	12	12	0	1	0	6	7	4	7	8	4	0	1	0	6	7	4	7	8	4	40.9	40.9	45.935	411	411;447;446;96	0	54.97	0	2.7	0	21.9	27.7	13.1	28	28.2	11.4	2994900000	0	1727500	0	394070000	468950000	258900000	640910000
O43242;H0YGV8	O43242	26S proteasome non-ATPase regulatory subunit 3	PSMD3	sp|O43242|PSMD3_HUMAN 26S proteasome non-ATPase regulatory subunit 3 OS=Homo sapiens OX=9606 GN=PSMD3 PE=1 SV=2	2	16	16	3	2	3	12	12	12	12	12	13	3	2	3	12	12	12	12	12	13	42.1	42.1	60.977	534	534;117	0	54.901	7.3	4.9	7.9	33	33.3	28.3	33.1	33	35.2	3509200000	20114000	2207700	19178000	408860000	473970000	423040000	725400000
P61313;A0A2R8YEM3;E7EQV9;E7ENU7;E7EX53;A0A2R8Y738;E7ERA2	P61313;A0A2R8YEM3;E7EQV9;E7ENU7;E7EX53;A0A2R8Y738	60S ribosomal protein L15;Ribosomal protein L15	RPL15	sp|P61313|RL15_HUMAN 60S ribosomal protein L15 OS=Homo sapiens OX=9606 GN=RPL15 PE=1 SV=2;tr|A0A2R8YEM3|A0A2R8YEM3_HUMAN Ribosomal protein L15 (Fragment) OS=Homo sapiens OX=9606 GN=RPL15 PE=1 SV=1;tr|E7EQV9|E7EQV9_HUMAN Ribosomal protein L15 (Fragment) OS=	7	10	10	5	6	5	5	7	6	6	6	6	5	6	5	5	7	6	6	6	6	44.1	44.1	24.146	204	204;169;174;175;133;138;44	0	54.436	18.1	29.9	18.1	17.2	27.5	23	21.6	27.5	27.5	21917000000	964820000	851730000	1185000000	2742000000	2680600000	2679800000	3008000000
P32322;E2QRB3;J3KQ22;J3QKT4;J3QL24;J3QR88;J3QLK9;J3QL23;J3QL32;J3KTA8;J3QKT3;J3QRZ0	P32322;E2QRB3;J3KQ22	Pyrroline-5-carboxylate reductase 1, mitochondrial;Pyrroline-5-carboxylate reductase	PYCR1	sp|P32322|P5CR1_HUMAN Pyrroline-5-carboxylate reductase 1, mitochondrial OS=Homo sapiens OX=9606 GN=PYCR1 PE=1 SV=2;tr|E2QRB3|E2QRB3_HUMAN Pyrroline-5-carboxylate reductase 1, isoform CRA_c OS=Homo sapiens OX=9606 GN=PYCR1 PE=1 SV=2;tr|J3KQ22|J3KQ22_HUMAN	12	11	10	1	1	1	6	5	3	6	8	8	1	1	1	6	5	3	6	7	7	44.8	40.8	33.36	319	319;288;253;242;225;132;165;173;217;84;94;115	0	54.289	5.6	5.6	5.6	31	27.6	14.7	27.6	29.8	35.4	1606600000	6386100	3018500	5121400	262150000	216320000	130970000	340790000
O95782	O95782	AP-2 complex subunit alpha-1	AP2A1	sp|O95782|AP2A1_HUMAN AP-2 complex subunit alpha-1 OS=Homo sapiens OX=9606 GN=AP2A1 PE=1 SV=3	1	25	19	3	1	1	15	10	14	12	14	13	2	1	1	11	8	10	8	11	10	33.8	26.1	107.54	977	977	0	54.179	3.6	1.4	1.4	21.3	15.1	19	18.6	19.1	17.5	2886600000	20450000	2437000	3588200	416050000	289070000	423280000	459120000
O14579;M0QXB4;M0R061	O14579;M0QXB4;M0R061	Coatomer subunit epsilon	COPE	sp|O14579|COPE_HUMAN Coatomer subunit epsilon OS=Homo sapiens OX=9606 GN=COPE PE=1 SV=3;tr|M0QXB4|M0QXB4_HUMAN Coatomer protein complex, subunit epsilon, isoform CRA_g OS=Homo sapiens OX=9606 GN=COPE PE=1 SV=1;tr|M0R061|M0R061_HUMAN Coatomer subunit epsilo	3	9	9	0	0	0	8	4	2	5	5	6	0	0	0	8	4	2	5	5	6	39.6	39.6	34.482	308	308;331;146	0	54.13	0	0	0	33.1	20.8	12.7	27.6	23.7	34.1	1200300000	0	0	0	174420000	82256000	16512000	337890000
Q15386	Q15386	Ubiquitin-protein ligase E3C	UBE3C	sp|Q15386|UBE3C_HUMAN Ubiquitin-protein ligase E3C OS=Homo sapiens OX=9606 GN=UBE3C PE=1 SV=3	1	22	22	0	0	0	6	10	5	13	12	9	0	0	0	6	10	5	13	12	9	30.9	30.9	123.92	1083	1083	0	54.049	0	0	0	7.8	13.4	6.3	17.6	16.3	11.4	2044700000	0	0	0	160510000	323860000	134270000	542170000
P62191;G3V4X1	P62191	26S protease regulatory subunit 4	PSMC1	sp|P62191|PRS4_HUMAN 26S proteasome regulatory subunit 4 OS=Homo sapiens OX=9606 GN=PSMC1 PE=1 SV=1	2	8	8	1	2	1	6	6	5	5	5	5	1	2	1	6	6	5	5	5	5	27.3	27.3	49.184	440	440;84	0	53.987	2.7	5.7	3.6	22	20.9	16.1	16.1	16.1	14.3	1336500000	0	9664300	2081800	202580000	210570000	153380000	221290000
P00491;G3V5M2;G3V2H3;G3V393	P00491;G3V5M2	Purine nucleoside phosphorylase	PNP	sp|P00491|PNPH_HUMAN Purine nucleoside phosphorylase OS=Homo sapiens OX=9606 GN=PNP PE=1 SV=2;tr|G3V5M2|G3V5M2_HUMAN Purine nucleoside phosphorylase (Fragment) OS=Homo sapiens OX=9606 GN=PNP PE=1 SV=1	4	12	12	2	0	1	9	6	6	10	9	8	2	0	1	9	6	6	10	9	8	57.8	57.8	32.118	289	289;221;93;61	0	53.903	12.1	0	3.5	49.5	30.8	33.2	54.7	50.9	40.1	1715300000	8468400	0	9033600	312070000	167040000	194700000	318880000
O00560;B4DHN5;E9PBU7	O00560;B4DHN5;E9PBU7	Syntenin-1	SDCBP	sp|O00560|SDCB1_HUMAN Syntenin-1 OS=Homo sapiens OX=9606 GN=SDCBP PE=1 SV=1;tr|B4DHN5|B4DHN5_HUMAN Syntenin-1 OS=Homo sapiens OX=9606 GN=SDCBP PE=1 SV=1;tr|E9PBU7|E9PBU7_HUMAN Syntenin-1 OS=Homo sapiens OX=9606 GN=SDCBP PE=1 SV=1	3	8	2	0	0	0	7	4	4	6	7	5	0	0	0	2	2	1	2	1	1	48.3	10.4	32.444	298	298;239;244	0	53.873	0	0	0	41.9	20.5	22.5	38.3	44	26.2	1131400000	0	0	0	156770000	79988000	43627000	322640000
P09622;E9PEX6;F8WDM5;A0A1W2PR83;F2Z2E3	P09622;E9PEX6	Dihydrolipoyl dehydrogenase, mitochondrial;Dihydrolipoyl dehydrogenase	DLD	sp|P09622|DLDH_HUMAN Dihydrolipoyl dehydrogenase, mitochondrial OS=Homo sapiens OX=9606 GN=DLD PE=1 SV=2;tr|E9PEX6|E9PEX6_HUMAN Dihydrolipoyl dehydrogenase OS=Homo sapiens OX=9606 GN=DLD PE=1 SV=1	5	8	8	2	1	1	4	4	5	4	6	5	2	1	1	4	4	5	4	6	5	27.7	27.7	54.177	509	509;486;114;114;115	0	53.642	6.3	3.3	2.9	14.9	11.2	13.4	11.2	19.8	15.5	1216200000	10998000	0	18910000	147170000	155010000	190280000	227420000
Q9NR12;D6RF83;H7BYK4;D6RH06;D6RAN1;H0Y8W6	Q9NR12	PDZ and LIM domain protein 7	PDLIM7	sp|Q9NR12|PDLI7_HUMAN PDZ and LIM domain protein 7 OS=Homo sapiens OX=9606 GN=PDLIM7 PE=1 SV=1	6	14	14	1	2	2	10	7	9	10	10	5	1	2	2	10	7	9	10	10	5	47.9	47.9	49.844	457	457;173;195;287;90;120	0	53.412	2.8	5.5	5.5	35.9	30.2	33	37.2	36.3	24.7	2048100000	5016900	6597300	5882700	363710000	187850000	208400000	438380000
Q8IYI6	Q8IYI6	Exocyst complex component 8	EXOC8	sp|Q8IYI6|EXOC8_HUMAN Exocyst complex component 8 OS=Homo sapiens OX=9606 GN=EXOC8 PE=1 SV=2	1	12	12	0	0	0	7	5	6	6	8	9	0	0	0	7	5	6	6	8	9	18.5	18.5	81.798	725	725	0	53.4	0	0	0	9.7	7	9.7	8.1	11.4	13.8	2666500000	0	0	0	314090000	346730000	292710000	469300000
P10768;X6RA14;H7BZT7;U3KQT1	P10768;X6RA14;H7BZT7	S-formylglutathione hydrolase	ESD	sp|P10768|ESTD_HUMAN S-formylglutathione hydrolase OS=Homo sapiens OX=9606 GN=ESD PE=1 SV=2;tr|X6RA14|X6RA14_HUMAN S-formylglutathione hydrolase OS=Homo sapiens OX=9606 GN=ESD PE=1 SV=1;tr|H7BZT7|H7BZT7_HUMAN S-formylglutathione hydrolase (Fragment) OS=Hom	4	9	9	1	3	1	6	6	5	6	6	9	1	3	1	6	6	5	6	6	9	51.4	51.4	31.462	282	282;253;230;120	0	53.219	4.3	16.7	4.3	36.9	41.1	33.3	41.1	41.1	51.4	4354000000	5114000	22271000	5283600	587770000	682300000	418710000	934430000
P26196;Q8IV96	P26196	Probable ATP-dependent RNA helicase DDX6	DDX6	sp|P26196|DDX6_HUMAN Probable ATP-dependent RNA helicase DDX6 OS=Homo sapiens OX=9606 GN=DDX6 PE=1 SV=2	2	9	9	2	1	2	7	6	6	6	7	7	2	1	2	7	6	6	6	7	7	27.7	27.7	54.416	483	483;187	0	53.025	6.4	3.9	8.9	23.2	20.1	20.1	20.1	21.1	23.2	1778400000	6830600	0	7380100	222740000	237680000	206740000	405230000
Q96HE7;G3V3E6;G3V5B3;G3V2H0;G3V503;Q5TAE8;Q86YB8	Q96HE7;G3V3E6	ERO1-like protein alpha	ERO1L	sp|Q96HE7|ERO1A_HUMAN ERO1-like protein alpha OS=Homo sapiens OX=9606 GN=ERO1A PE=1 SV=2;tr|G3V3E6|G3V3E6_HUMAN ERO1-like protein alpha OS=Homo sapiens OX=9606 GN=ERO1A PE=1 SV=1	7	12	12	0	0	0	6	5	5	8	4	4	0	0	0	6	5	5	8	4	4	37	37	54.392	468	468;257;169;75;125;173;467	0	52.855	0	0	0	18.4	20.5	18.6	23.5	13	12.8	1663400000	0	0	0	206250000	327880000	209080000	530340000
P12277;G3V4N7;H0YJG0;G3V461;P06732	P12277;G3V4N7	Creatine kinase B-type	CKB	sp|P12277|KCRB_HUMAN Creatine kinase B-type OS=Homo sapiens OX=9606 GN=CKB PE=1 SV=1;tr|G3V4N7|G3V4N7_HUMAN Creatine kinase B-type (Fragment) OS=Homo sapiens OX=9606 GN=CKB PE=1 SV=1	5	10	10	7	6	5	5	4	9	3	4	9	7	6	5	5	4	9	3	4	9	39.6	39.6	42.644	381	381;217;179;128;381	0	52.823	27	24.9	21	19.7	15.2	39.6	10.5	13.6	34.6	3124800000	144940000	85324000	95933000	136760000	108270000	1678500000	73350000
O15173;U3KQM0	O15173	Membrane-associated progesterone receptor component 2	PGRMC2	sp|O15173|PGRC2_HUMAN Membrane-associated progesterone receptor component 2 OS=Homo sapiens OX=9606 GN=PGRMC2 PE=1 SV=1	2	8	7	1	0	0	6	5	6	5	6	5	1	0	0	5	4	5	4	5	4	36.3	36.3	23.818	223	223;91	0	52.776	8.5	0	0	26.5	22.9	32.7	22.9	26.5	26	4742200000	5250000	0	0	805090000	638980000	541700000	938910000
P30559	P30559	Oxytocin receptor	OXTR	sp|P30559|OXYR_HUMAN Oxytocin receptor OS=Homo sapiens OX=9606 GN=OXTR PE=2 SV=2	1	1	1	0	0	0	1	1	1	1	1	1	0	0	0	1	1	1	1	1	1	5.1	5.1	42.771	389	389	0	52.75	0	0	0	5.1	5.1	5.1	5.1	5.1	5.1	27320000	0	0	0	2884700	4520300	3232500	6763900
Q15233;H7C367;C9IZL7;C9JYS8;C9J4X2	Q15233;H7C367	Non-POU domain-containing octamer-binding protein	NONO	sp|Q15233|NONO_HUMAN Non-POU domain-containing octamer-binding protein OS=Homo sapiens OX=9606 GN=NONO PE=1 SV=4;tr|H7C367|H7C367_HUMAN Non-POU domain-containing octamer-binding protein (Fragment) OS=Homo sapiens OX=9606 GN=NONO PE=1 SV=8	5	14	13	0	3	0	12	10	9	9	11	6	0	2	0	12	10	9	9	11	6	42	40.3	54.231	471	471;234;207;247;124	0	52.724	0	7.2	0	37.8	30.1	27.4	32.9	37.8	18.7	2452000000	0	0	0	475100000	372150000	277250000	501040000
P36957;Q86SW4;H0YJF9;G3V5M3;G3V3F0	P36957	Dihydrolipoyllysine-residue succinyltransferase component of 2-oxoglutarate dehydrogenase complex, mitochondrial	DLST	sp|P36957|ODO2_HUMAN Dihydrolipoyllysine-residue succinyltransferase component of 2-oxoglutarate dehydrogenase complex, mitochondrial OS=Homo sapiens OX=9606 GN=DLST PE=1 SV=4	5	7	7	4	2	2	7	6	6	6	6	4	4	2	2	7	6	6	6	6	4	19	19	48.755	453	453;279;74;83;104	0	52.594	10.2	6	5.7	19	17.4	16.3	17.4	17.2	10.2	1334600000	37796000	3254500	7695400	149640000	179710000	261650000	269690000
P31930	P31930	Cytochrome b-c1 complex subunit 1, mitochondrial	UQCRC1	sp|P31930|QCR1_HUMAN Cytochrome b-c1 complex subunit 1, mitochondrial OS=Homo sapiens OX=9606 GN=UQCRC1 PE=1 SV=3	1	11	11	1	1	2	10	5	5	9	5	8	1	1	2	10	5	5	9	5	8	31.2	31.2	52.645	480	480	0	52.46	4	1.9	6.5	31.2	16.2	13.8	28.8	18.1	26.7	1518900000	5266800	0	11616000	199760000	166360000	110970000	413650000
P50402;Q5HY57;F8WEQ1	P50402;Q5HY57	Emerin	EMD	sp|P50402|EMD_HUMAN Emerin OS=Homo sapiens OX=9606 GN=EMD PE=1 SV=1;tr|Q5HY57|Q5HY57_HUMAN Emerin OS=Homo sapiens OX=9606 GN=EMD PE=1 SV=1	3	10	10	0	0	0	7	5	4	6	10	5	0	0	0	7	5	4	6	10	5	64.2	64.2	28.994	254	254;219;21	0	52.449	0	0	0	44.5	22	22	41.3	64.2	37.4	1354200000	0	0	0	263960000	102090000	66577000	187420000
P18085;C9JPM4;C9JAK5;U3KQF2	P18085;C9JPM4;C9JAK5	ADP-ribosylation factor 4	ARF4	sp|P18085|ARF4_HUMAN ADP-ribosylation factor 4 OS=Homo sapiens OX=9606 GN=ARF4 PE=1 SV=3;tr|C9JPM4|C9JPM4_HUMAN ADP-ribosylation factor 4 (Fragment) OS=Homo sapiens OX=9606 GN=ARF4 PE=1 SV=1;tr|C9JAK5|C9JAK5_HUMAN ADP-ribosylation factor 4 OS=Homo sapiens	4	12	7	4	4	5	10	10	11	9	11	11	2	3	3	7	7	6	7	7	6	65.6	35.6	20.511	180	180;127;153;71	0	52.417	31.7	29.4	39.4	54.4	54.4	65.6	53.3	65.6	65.6	28273000000	90913000	178780000	124250000	3808600000	3734600000	3573200000	5381400000
A0A087WY71;E9PFW3;Q96CW1;C9JJ47;H7C4C3;C9JTK4;C9JGT8;C9JJD3;C9JPV8	A0A087WY71;E9PFW3;Q96CW1	AP-2 complex subunit mu	AP2M1	tr|A0A087WY71|A0A087WY71_HUMAN AP-2 complex subunit mu OS=Homo sapiens OX=9606 GN=AP2M1 PE=1 SV=1;tr|E9PFW3|E9PFW3_HUMAN AP-2 complex subunit mu OS=Homo sapiens OX=9606 GN=AP2M1 PE=1 SV=1;sp|Q96CW1|AP2M1_HUMAN AP-2 complex subunit mu OS=Homo sapiens OX=960	9	10	10	1	3	2	6	6	7	4	7	7	1	3	2	6	6	7	4	7	7	31.8	31.8	49.526	434	434;460;435;252;122;160;195;113;136	0	52.305	3.9	9.7	6	21.2	21.7	25.1	14.5	25.1	25.3	1477300000	0	6808600	0	207790000	184390000	262140000	123590000
P31946;Q4VY20;Q4VY19;A0A0J9YWE8;A0A0J9YWZ2;P31947	P31946	14-3-3 protein beta/alpha;14-3-3 protein beta/alpha, N-terminally processed	YWHAB	sp|P31946|1433B_HUMAN 14-3-3 protein beta/alpha OS=Homo sapiens OX=9606 GN=YWHAB PE=1 SV=3	6	13	8	5	7	3	9	9	8	9	8	8	4	5	3	5	6	6	6	5	6	61.4	43.9	28.082	246	246;74;100;149;81;248	0	52.239	34.1	42.3	24.4	48	47.6	41.1	45.5	43.5	44.7	2746900000	27298000	39986000	27144000	321300000	333670000	292650000	532630000
O00154;K7EKP8	O00154;K7EKP8	Cytosolic acyl coenzyme A thioester hydrolase	ACOT7	sp|O00154|BACH_HUMAN Cytosolic acyl coenzyme A thioester hydrolase OS=Homo sapiens OX=9606 GN=ACOT7 PE=1 SV=3;tr|K7EKP8|K7EKP8_HUMAN Cytosolic acyl coenzyme A thioester hydrolase (Fragment) OS=Homo sapiens OX=9606 GN=ACOT7 PE=1 SV=8	2	9	9	2	1	2	7	3	6	6	8	6	2	1	2	7	3	6	6	8	6	37.4	37.4	41.796	380	380;279	0	52.187	6.1	3.2	6.1	27.1	11.1	24.7	23.9	32.9	24.2	2479700000	16726000	4582000	13720000	322000000	246080000	282980000	478770000
P49189	P49189	4-trimethylaminobutyraldehyde dehydrogenase	ALDH9A1	sp|P49189|AL9A1_HUMAN 4-trimethylaminobutyraldehyde dehydrogenase OS=Homo sapiens OX=9606 GN=ALDH9A1 PE=1 SV=3	1	15	15	6	2	4	12	11	10	13	10	11	6	2	4	12	11	10	13	10	11	35.2	35.2	53.801	494	494	0	51.936	16.2	4.3	10.1	29.8	25.5	20.4	33.8	25.9	31.2	3365900000	23090000	10920000	24868000	511880000	486380000	285930000	828880000
P30519;I3L159;I3L1F5;I3L4P8;A0A1B0GXH0;I3L463;I3L276	P30519;I3L159;I3L1F5	Heme oxygenase 2	HMOX2	sp|P30519|HMOX2_HUMAN Heme oxygenase 2 OS=Homo sapiens OX=9606 GN=HMOX2 PE=1 SV=2;tr|I3L159|I3L159_HUMAN Heme oxygenase 2 (Fragment) OS=Homo sapiens OX=9606 GN=HMOX2 PE=1 SV=1;tr|I3L1F5|I3L1F5_HUMAN Heme oxygenase 2 (Fragment) OS=Homo sapiens OX=9606 GN=HM	7	12	1	0	0	0	7	4	4	7	9	9	0	0	0	0	0	0	0	0	1	51.6	5.1	36.032	316	316;229;238;130;131;132;110	0	51.908	0	0	0	31	14.2	11.1	27.8	39.6	42.4	1463700000	0	0	0	174580000	108110000	57876000	396060000
Q9NYH9	Q9NYH9	U3 small nucleolar RNA-associated protein 6 homolog	UTP6	sp|Q9NYH9|UTP6_HUMAN U3 small nucleolar RNA-associated protein 6 homolog OS=Homo sapiens OX=9606 GN=UTP6 PE=2 SV=2	1	3	3	0	0	0	2	1	1	2	3	1	0	0	0	2	1	1	2	3	1	4.9	4.9	70.193	597	597	0	51.872	0	0	0	4.7	2.5	2.5	2.7	4.9	2.5	106860000	0	0	0	30902000	0	0	7762100
Q68E01;A0A096LNW8	Q68E01	Integrator complex subunit 3	INTS3	sp|Q68E01|INT3_HUMAN Integrator complex subunit 3 OS=Homo sapiens OX=9606 GN=INTS3 PE=1 SV=1	2	11	11	0	0	0	7	7	8	7	5	5	0	0	0	7	7	8	7	5	5	15.1	15.1	118.07	1043	1043;280	0	51.865	0	0	0	10.3	11	12.3	10.5	6.6	6.6	567060000	0	0	0	111640000	114510000	80087000	105310000
P51991;H7C1J8	P51991	Heterogeneous nuclear ribonucleoprotein A3	HNRNPA3	sp|P51991|ROA3_HUMAN Heterogeneous nuclear ribonucleoprotein A3 OS=Homo sapiens OX=9606 GN=HNRNPA3 PE=1 SV=2	2	12	12	3	4	1	6	4	4	5	6	8	3	4	1	6	4	4	5	6	8	39.9	39.9	39.594	378	378;115	0	51.846	13.5	15.6	5.8	27.5	17.7	14.6	22	18	26.7	1708300000	20392000	24294000	0	279970000	80056000	221830000	224780000
Q96IX5	Q96IX5	Up-regulated during skeletal muscle growth protein 5	USMG5	sp|Q96IX5|ATPMD_HUMAN ATP synthase membrane subunit DAPIT, mitochondrial OS=Homo sapiens OX=9606 GN=ATP5MD PE=1 SV=1	1	3	3	0	0	0	2	3	3	3	3	3	0	0	0	2	3	3	3	3	3	44.8	44.8	6.4575	58	58	0	51.82	0	0	0	27.6	44.8	44.8	44.8	44.8	44.8	1832900000	0	0	0	151330000	263720000	198780000	442290000
Q9BT22;K7EID2;K7EPU3;K7EQK1;A0A087WZJ8;Q6GMV1	Q9BT22	Chitobiosyldiphosphodolichol beta-mannosyltransferase	ALG1	sp|Q9BT22|ALG1_HUMAN Chitobiosyldiphosphodolichol beta-mannosyltransferase OS=Homo sapiens OX=9606 GN=ALG1 PE=1 SV=2	6	7	7	0	0	0	4	4	3	4	4	4	0	0	0	4	4	3	4	4	4	21.3	21.3	52.518	464	464;167;184;84;207;187	0	51.767	0	0	0	9.5	11.2	9.9	11.2	11.2	11.2	1082600000	0	0	0	88716000	120560000	109060000	261090000
P61289;B3KQ25;K7ESG5;K9J957;A0A087WTV2;K7ENH2;K7EPX6;K7EKR3;K7EMD0;B7Z8D3	P61289;B3KQ25;K7ESG5;K9J957;A0A087WTV2;K7ENH2;K7EPX6;K7EKR3	Proteasome activator complex subunit 3	PSME3	sp|P61289|PSME3_HUMAN Proteasome activator complex subunit 3 OS=Homo sapiens OX=9606 GN=PSME3 PE=1 SV=1;tr|B3KQ25|B3KQ25_HUMAN Proteasome activator complex subunit 3 OS=Homo sapiens OX=9606 GN=PSME3 PE=1 SV=1;tr|K7ESG5|K7ESG5_HUMAN Proteasome activator com	10	6	6	0	0	0	3	3	4	4	6	4	0	0	0	3	3	4	4	6	4	30.3	30.3	29.506	254	254;193;198;231;170;179;110;118;96;130	0	51.573	0	0	0	18.9	18.9	24.4	24	30.3	24	1176000000	0	0	0	188470000	131410000	50846000	238390000
Q9UBV2;G3V3B3	Q9UBV2	Protein sel-1 homolog 1	SEL1L	sp|Q9UBV2|SE1L1_HUMAN Protein sel-1 homolog 1 OS=Homo sapiens OX=9606 GN=SEL1L PE=1 SV=3	2	13	13	0	1	0	7	6	5	5	5	6	0	1	0	7	6	5	5	5	6	26.2	26.2	88.754	794	794;163	0	51.413	0	2.5	0	13.6	13.2	10.3	11.1	10.8	12.5	1547300000	0	2099200	0	267490000	242240000	142960000	253190000
K4DI93;Q13620;A6NE76	K4DI93;Q13620	Cullin-4B	CUL4B	tr|K4DI93|K4DI93_HUMAN Cullin 4B, isoform CRA_e OS=Homo sapiens OX=9606 GN=CUL4B PE=1 SV=1;sp|Q13620|CUL4B_HUMAN Cullin-4B OS=Homo sapiens OX=9606 GN=CUL4B PE=1 SV=4	3	14	11	0	0	0	8	6	9	7	12	5	0	0	0	7	5	8	6	9	4	16.8	13.8	102.75	900	900;913;234	0	51.301	0	0	0	12.3	8.9	11.4	10.3	14.2	7.8	1213100000	0	0	0	154880000	137920000	143080000	316520000
A0A0D9SFB1;Q05193;A0A0D9SFE4;A0A1B0GU67;A0A1B0GUX5;H7C5U0	A0A0D9SFB1;Q05193;A0A0D9SFE4;A0A1B0GU67;A0A1B0GUX5	Dynamin-1	DNM1	tr|A0A0D9SFB1|A0A0D9SFB1_HUMAN Dynamin-1 OS=Homo sapiens OX=9606 GN=DNM1 PE=1 SV=1;sp|Q05193|DYN1_HUMAN Dynamin-1 OS=Homo sapiens OX=9606 GN=DNM1 PE=1 SV=2;tr|A0A0D9SFE4|A0A0D9SFE4_HUMAN Dynamin-1 OS=Homo sapiens OX=9606 GN=DNM1 PE=1 SV=1;tr|A0A1B0GU67|A0A	6	20	1	5	9	2	6	7	12	5	6	15	1	1	1	1	1	1	0	1	1	38.2	1.8	94.016	835	835;864;864;356;320;131	0	51.105	13.5	16.9	3.6	8.6	10.4	25.5	5.9	10.9	29.1	1865700000	52786000	71947000	28091000	52584000	102000000	769430000	14746000
P62714;H0YC23;E5RHC1;E5RFI3;E5RHP4;E7ESG8;H0YBN9;E5RJX4	P62714	Serine/threonine-protein phosphatase 2A catalytic subunit beta isoform	PPP2CB	sp|P62714|PP2AB_HUMAN Serine/threonine-protein phosphatase 2A catalytic subunit beta isoform OS=Homo sapiens OX=9606 GN=PPP2CB PE=1 SV=1	8	9	1	1	1	0	5	5	4	7	6	8	0	0	0	1	1	1	1	1	0	46.3	4.2	35.575	309	309;124;184;125;126;145;52;47	0	50.927	4.9	4.9	0	25.2	21.7	17.2	36.6	26.5	42.1	1646200000	0	0	0	123970000	222110000	167620000	435890000
P23246;H0Y9K7;H0Y9U2	P23246	Splicing factor, proline- and glutamine-rich	SFPQ	sp|P23246|SFPQ_HUMAN Splicing factor, proline- and glutamine-rich OS=Homo sapiens OX=9606 GN=SFPQ PE=1 SV=2	3	14	13	3	3	2	11	9	10	10	11	7	3	2	2	11	9	10	10	11	7	25.9	24.8	76.149	707	707;223;88	0	50.897	4.7	4.8	3.7	19.4	17.5	19.5	18.5	21.5	14.4	4696700000	17986000	27908000	13850000	802180000	640350000	739930000	1093600000
Q96R06;K7ELG0;K7ELC8;E9PMD0	Q96R06	Sperm-associated antigen 5	SPAG5	sp|Q96R06|SPAG5_HUMAN Sperm-associated antigen 5 OS=Homo sapiens OX=9606 GN=SPAG5 PE=1 SV=2	4	3	3	0	0	0	2	2	1	2	2	2	0	0	0	2	2	1	2	2	2	3.1	3.1	134.42	1193	1193;185;186;336	0	50.8	0	0	0	2.1	2.3	1.3	2.3	2.3	2.3	294160000	0	0	0	34007000	47148000	24963000	85727000
B4DY09;Q12905;X6R6Z1;A0A0A0MRL0	B4DY09;Q12905	Interleukin enhancer-binding factor 2	ILF2	tr|B4DY09|B4DY09_HUMAN Interleukin enhancer-binding factor 2 OS=Homo sapiens OX=9606 GN=ILF2 PE=1 SV=1;sp|Q12905|ILF2_HUMAN Interleukin enhancer-binding factor 2 OS=Homo sapiens OX=9606 GN=ILF2 PE=1 SV=2	4	16	16	3	1	2	12	8	7	13	10	10	3	1	2	12	8	7	13	10	10	59.1	59.1	38.91	352	352;390;115;150	0	50.752	11.1	3.4	8.5	56	31.2	36.1	51.7	50	45.5	5773600000	23663000	0	6221600	861260000	769800000	381500000	1603900000
Q04446;E9PGM4	Q04446;E9PGM4	1,4-alpha-glucan-branching enzyme	GBE1	sp|Q04446|GLGB_HUMAN 1,4-alpha-glucan-branching enzyme OS=Homo sapiens OX=9606 GN=GBE1 PE=1 SV=3;tr|E9PGM4|E9PGM4_HUMAN 1,4-alpha-glucan-branching enzyme OS=Homo sapiens OX=9606 GN=GBE1 PE=1 SV=1	2	11	11	1	1	1	5	3	5	6	6	8	1	1	1	5	3	5	6	6	8	24.4	24.4	80.473	702	702;661	0	50.701	2	2	2.1	11.5	6.8	10.8	14	13	19.4	2680100000	3173700	2509800	0	390330000	299910000	294770000	529720000
A0A2R8YD50;P51659;E7EWE5;E7ER27;A0A2R8Y7L2;G5E9S2;E7ET17;E7EPL9;A0A2R8YDT8;A0A2R8YF45;A0A2R8YEG2;A0A2R8Y7W2	A0A2R8YD50;P51659;E7EWE5;E7ER27;A0A2R8Y7L2;G5E9S2;E7ET17;E7EPL9	Peroxisomal multifunctional enzyme type 2;(3R)-hydroxyacyl-CoA dehydrogenase;Enoyl-CoA hydratase 2	HSD17B4	tr|A0A2R8YD50|A0A2R8YD50_HUMAN Peroxisomal multifunctional enzyme type 2 OS=Homo sapiens OX=9606 GN=HSD17B4 PE=1 SV=1;sp|P51659|DHB4_HUMAN Peroxisomal multifunctional enzyme type 2 OS=Homo sapiens OX=9606 GN=HSD17B4 PE=1 SV=3;tr|E7EWE5|E7EWE5_HUMAN Peroxis	12	16	16	2	2	1	10	7	8	8	8	6	2	2	1	10	7	8	8	8	6	34.7	34.7	76.837	711	711;736;712;500;589;596;599;474;166;172;59;105	0	50.621	3.5	3.5	1.8	20	14.9	19.3	21.7	20	14.9	1966900000	12002000	10277000	4893500	424140000	222770000	264430000	450040000
Q13162;H7C3T4;A6NG45;A6NJJ0	Q13162;H7C3T4	Peroxiredoxin-4	PRDX4	sp|Q13162|PRDX4_HUMAN Peroxiredoxin-4 OS=Homo sapiens OX=9606 GN=PRDX4 PE=1 SV=1;tr|H7C3T4|H7C3T4_HUMAN Peroxiredoxin-4 (Fragment) OS=Homo sapiens OX=9606 GN=PRDX4 PE=1 SV=1	4	10	8	3	1	2	8	8	9	9	9	9	3	1	2	8	8	8	8	8	8	50.9	45.4	30.54	271	271;161;186;185	0	50.541	13.3	4.4	11.4	45.4	45.4	48.3	48	48.3	48.3	4460500000	15335000	9052300	20893000	574880000	706270000	552880000	806150000
Q5T8U5;O15260;B7Z1G8	Q5T8U5;O15260	Surfeit locus protein 4	SURF4	tr|Q5T8U5|Q5T8U5_HUMAN Surfeit 4 OS=Homo sapiens OX=9606 GN=SURF4 PE=1 SV=1;sp|O15260|SURF4_HUMAN Surfeit locus protein 4 OS=Homo sapiens OX=9606 GN=SURF4 PE=1 SV=3	3	5	5	2	1	2	5	5	4	4	5	4	2	1	2	5	5	4	4	5	4	31.2	31.2	21.127	186	186;269;226	0	50.239	11.3	4.3	11.3	31.2	31.2	26.9	26.9	31.2	26.9	15044000000	8745200	4305900	23192000	2027200000	1883000000	1787300000	2336100000
P23284	P23284	Peptidyl-prolyl cis-trans isomerase B	PPIB	sp|P23284|PPIB_HUMAN Peptidyl-prolyl cis-trans isomerase B OS=Homo sapiens OX=9606 GN=PPIB PE=1 SV=2	1	12	12	3	5	6	11	12	11	10	11	10	3	5	6	11	12	11	10	11	10	50	50	23.742	216	216	0	50.008	17.1	26.9	31.5	47.2	50	50	44	47.2	44	22527000000	85030000	77590000	264820000	3226200000	3079400000	2361300000	4953200000
P17600;A0A1W2PS00	P17600	Synapsin-1	SYN1	sp|P17600|SYN1_HUMAN Synapsin-1 OS=Homo sapiens OX=9606 GN=SYN1 PE=1 SV=3	2	15	14	1	4	2	1	2	9	0	2	11	1	4	2	1	2	8	0	2	11	37.7	35.5	74.111	705	705;148	0	49.922	2	7	3.7	1.7	5.2	24.7	0	3.7	25	1675000000	16750000	41435000	35751000	35854000	41715000	868290000	0
P52292;J3QLL0;J3KS65	P52292	Importin subunit alpha-1	KPNA2	sp|P52292|IMA1_HUMAN Importin subunit alpha-1 OS=Homo sapiens OX=9606 GN=KPNA2 PE=1 SV=1	3	15	15	0	0	0	12	8	9	10	10	8	0	0	0	12	8	9	10	10	8	42.9	42.9	57.861	529	529;134;143	0	49.914	0	0	0	36.7	24.8	27.2	29.7	28.9	25.5	3234800000	0	0	0	600330000	466810000	467760000	667300000
Q08209;E7ETC2;E9PPC8;E9PK68;Q5F2F8;P16298;H0YC26;P48454	Q08209;E7ETC2	Serine/threonine-protein phosphatase 2B catalytic subunit alpha isoform;Serine/threonine-protein phosphatase	PPP3CA	sp|Q08209|PP2BA_HUMAN Serine/threonine-protein phosphatase 2B catalytic subunit alpha isoform OS=Homo sapiens OX=9606 GN=PPP3CA PE=1 SV=1;tr|E7ETC2|E7ETC2_HUMAN Serine/threonine-protein phosphatase OS=Homo sapiens OX=9606 GN=PPP3CA PE=1 SV=1	8	9	9	3	1	1	1	2	3	3	4	2	3	1	1	1	2	3	3	4	2	26.3	26.3	58.687	521	521;423;132;147;496;524;209;512	0	49.859	9.6	6.1	6.1	1.5	5	7.7	10.6	16.1	4	532060000	31508000	10582000	22685000	0	115050000	77336000	71736000
Q12860;H0YIJ1	Q12860	Contactin-1	CNTN1	sp|Q12860|CNTN1_HUMAN Contactin-1 OS=Homo sapiens OX=9606 GN=CNTN1 PE=1 SV=1	2	8	8	1	3	0	0	0	5	0	0	2	1	3	0	0	0	5	0	0	2	10.4	10.4	113.32	1018	1018;57	0	49.727	2	3.9	0	0	0	6.2	0	0	3	237120000	9814300	7024400	0	0	0	172320000	0
Q8TC12;G3V2G6;G3V234;H0YIZ8;H0YJ46	Q8TC12;G3V2G6;G3V234;H0YIZ8	Retinol dehydrogenase 11	RDH11	sp|Q8TC12|RDH11_HUMAN Retinol dehydrogenase 11 OS=Homo sapiens OX=9606 GN=RDH11 PE=1 SV=2;tr|G3V2G6|G3V2G6_HUMAN Retinol dehydrogenase 11 (Fragment) OS=Homo sapiens OX=9606 GN=RDH11 PE=1 SV=1;tr|G3V234|G3V234_HUMAN Retinol dehydrogenase 11 (Fragment) OS=Ho	5	6	6	1	0	0	6	4	3	6	6	5	1	0	0	6	4	3	6	6	5	27.7	27.7	35.386	318	318;178;186;118;204	0	49.661	4.4	0	0	27.7	17.6	13.5	27.7	27.7	23.9	2734100000	2995300	0	0	390510000	207250000	178020000	703420000
E5RI99;P62888;A0A0B4J213;E5RJH3;A0A0C4DH44	E5RI99;P62888;A0A0B4J213	60S ribosomal protein L30	RPL30	tr|E5RI99|E5RI99_HUMAN 60S ribosomal protein L30 (Fragment) OS=Homo sapiens OX=9606 GN=RPL30 PE=1 SV=1;sp|P62888|RL30_HUMAN 60S ribosomal protein L30 OS=Homo sapiens OX=9606 GN=RPL30 PE=1 SV=2;tr|A0A0B4J213|A0A0B4J213_HUMAN 60S ribosomal protein L30 OS=Hom	5	4	4	4	3	4	4	4	4	4	4	4	4	3	4	4	4	4	4	4	4	51.8	51.8	12.656	114	114;115;51;56;96	0	49.412	51.8	41.2	51.8	51.8	51.8	51.8	51.8	51.8	51.8	8704000000	84833000	103220000	110620000	1254600000	1383300000	963870000	1885200000
Q9NPQ8;H0YEN0;E9PI04;E9PSI0;E9PLE5;H0YE35;B7WPL0;Q9NVN3	Q9NPQ8	Synembryn-A	RIC8A	sp|Q9NPQ8|RIC8A_HUMAN Synembryn-A OS=Homo sapiens OX=9606 GN=RIC8A PE=1 SV=3	8	8	8	0	0	0	4	4	2	7	7	6	0	0	0	4	4	2	7	7	6	22	22	59.709	531	531;286;148;183;52;147;560;520	0	49.399	0	0	0	13.4	11.3	6	20	18.6	17.1	801650000	0	0	0	165310000	92960000	28086000	223830000
P62829;J3KT29;J3KTJ3;C9JD32;B9ZVP7	P62829;J3KT29;J3KTJ3;C9JD32;B9ZVP7	60S ribosomal protein L23	RPL23	sp|P62829|RL23_HUMAN 60S ribosomal protein L23 OS=Homo sapiens OX=9606 GN=RPL23 PE=1 SV=1;tr|J3KT29|J3KT29_HUMAN 60S ribosomal protein L23 OS=Homo sapiens OX=9606 GN=RPL23 PE=1 SV=1;tr|J3KTJ3|J3KTJ3_HUMAN 60S ribosomal protein L23 OS=Homo sapiens OX=9606 G	5	8	8	4	3	4	5	5	5	6	6	8	4	3	4	5	5	5	6	6	8	47.9	47.9	14.865	140	140;122;81;91;114	0	49.226	43.6	30.7	43.6	44.3	33.6	45.7	46.4	46.4	47.9	14135000000	239050000	216470000	364840000	2068600000	2252000000	1601600000	2631400000
A0A1W2PQT3;A0A1W2PPH1;A0A1W2PQH3;A0A1W2PQY8;P23368;A0A1W2PR68;A0A1W2PQ37;A0A1W2PQF8;A0A1W2PRH1;A0A1W2PRS2;A0A1W2PRY9;A0A1W2PQH4	A0A1W2PQT3;A0A1W2PPH1;A0A1W2PQH3;A0A1W2PQY8;P23368;A0A1W2PR68;A0A1W2PQ37;A0A1W2PQF8	NAD-dependent malic enzyme, mitochondrial	ME2	tr|A0A1W2PQT3|A0A1W2PQT3_HUMAN Malic enzyme OS=Homo sapiens OX=9606 GN=ME2 PE=1 SV=1;tr|A0A1W2PPH1|A0A1W2PPH1_HUMAN Malic enzyme OS=Homo sapiens OX=9606 GN=ME2 PE=1 SV=1;tr|A0A1W2PQH3|A0A1W2PQH3_HUMAN Malic enzyme OS=Homo sapiens OX=9606 GN=ME2 PE=1 SV=1;t	12	8	8	1	0	0	3	3	2	4	5	6	1	0	0	3	3	2	4	5	6	18.7	18.7	59.787	536	536;546;547;565;584;530;443;480;83;132;133;133	0	48.976	2.8	0	0	6.9	8.4	4.7	8.4	12.5	13.1	809130000	0	0	0	156990000	82360000	44846000	171670000
Q15942;H0Y2Y8;H7C3D3;C9IZ41;C9JJK5;H7C3R3	Q15942;H0Y2Y8	Zyxin	ZYX	sp|Q15942|ZYX_HUMAN Zyxin OS=Homo sapiens OX=9606 GN=ZYX PE=1 SV=1;tr|H0Y2Y8|H0Y2Y8_HUMAN Zyxin (Fragment) OS=Homo sapiens OX=9606 GN=ZYX PE=1 SV=1	6	13	13	4	2	1	11	7	7	6	7	5	4	2	1	11	7	7	6	7	5	41.6	41.6	61.277	572	572;540;176;164;171;177	0	48.924	11.7	4.5	2.8	32.3	21.9	21.5	20.1	25	17	1809500000	15661000	9822300	5072600	290700000	212240000	191650000	469620000
P48681	P48681	Nestin	NES	sp|P48681|NEST_HUMAN Nestin OS=Homo sapiens OX=9606 GN=NES PE=1 SV=2	1	18	18	3	1	1	10	10	12	8	13	7	3	1	1	10	10	12	8	13	7	15.1	15.1	177.44	1621	1621	0	48.917	2.7	0.9	0.7	7.8	8.2	9.7	6.1	9.7	6.1	2462900000	2958200	0	2886500	350570000	394000000	285250000	489520000
A0A087WXM6;J3QQT2;J3KRX5;A0A0A6YYL6;P18621;J3QLC8;A0A0A0MRF8;J3KRB3;A0A087WWH0;J3QS96;A0A087WY81;J3KSJ0	A0A087WXM6;J3QQT2;J3KRX5;A0A0A6YYL6;P18621;J3QLC8;A0A0A0MRF8;J3KRB3;A0A087WWH0;J3QS96;A0A087WY81	60S ribosomal protein L17	RPL17;RPL17-C18orf32	tr|A0A087WXM6|A0A087WXM6_HUMAN 60S ribosomal protein L17 (Fragment) OS=Homo sapiens OX=9606 GN=RPL17 PE=1 SV=1;tr|J3QQT2|J3QQT2_HUMAN 60S ribosomal protein L17 (Fragment) OS=Homo sapiens OX=9606 GN=RPL17 PE=1 SV=1;tr|J3KRX5|J3KRX5_HUMAN 60S ribosomal prote	12	9	9	6	6	6	9	6	7	6	7	7	6	6	6	9	6	7	6	7	7	51.5	51.5	19.586	169	169;171;174;228;184;174;190;129;131;138;97;56	0	48.914	34.3	34.3	34.3	51.5	40.8	41.4	40.8	41.4	41.4	13776000000	332290000	258840000	537950000	2267700000	1855300000	1662500000	2183400000
Q9H845;H0Y8Z9;D6RCD8	Q9H845;H0Y8Z9	Acyl-CoA dehydrogenase family member 9, mitochondrial	ACAD9	sp|Q9H845|ACAD9_HUMAN Complex I assembly factor ACAD9, mitochondrial OS=Homo sapiens OX=9606 GN=ACAD9 PE=1 SV=1;tr|H0Y8Z9|H0Y8Z9_HUMAN Complex I assembly factor ACAD9, mitochondrial (Fragment) OS=Homo sapiens OX=9606 GN=ACAD9 PE=1 SV=1	3	16	16	0	0	0	8	10	7	9	13	9	0	0	0	8	10	7	9	13	9	29.6	29.6	68.76	621	621;384;173	0	48.89	0	0	0	18.7	18.7	13.5	17.1	23.7	19.2	2972100000	0	0	0	260030000	532360000	227920000	654340000
Q9BWM7;A0A1P0AYU5;S4R3N9	Q9BWM7;A0A1P0AYU5;S4R3N9	Sideroflexin-3	SFXN3	sp|Q9BWM7|SFXN3_HUMAN Sideroflexin-3 OS=Homo sapiens OX=9606 GN=SFXN3 PE=1 SV=3;tr|A0A1P0AYU5|A0A1P0AYU5_HUMAN Sidoreflexin OS=Homo sapiens OX=9606 GN=SFXN3 PE=1 SV=1;tr|S4R3N9|S4R3N9_HUMAN Sideroflexin-3 OS=Homo sapiens OX=9606 GN=SFXN3 PE=1 SV=1	3	10	9	0	0	0	4	3	3	4	6	4	0	0	0	4	2	2	4	6	4	46.4	40.5	35.503	321	321;325;177	0	48.64	0	0	0	17.8	14.3	14.3	16.5	27.7	15.9	920440000	0	0	0	189950000	52175000	65944000	168120000
P09104;F5H0C8;F5H1C3;U3KQP4;U3KQQ1	P09104;F5H0C8	Gamma-enolase;Enolase	ENO2	sp|P09104|ENOG_HUMAN Gamma-enolase OS=Homo sapiens OX=9606 GN=ENO2 PE=1 SV=3;tr|F5H0C8|F5H0C8_HUMAN Gamma-enolase OS=Homo sapiens OX=9606 GN=ENO2 PE=1 SV=1	5	12	10	4	5	4	6	5	11	4	6	9	2	3	2	4	3	9	2	4	7	48.8	41.2	47.268	434	434;315;103;73;86	0	48.595	14.5	21.7	14.5	21	20.5	45.6	13.4	21	35.9	1456100000	20341000	24014000	29494000	56344000	32126000	900110000	20946000
A0A2R8Y6J3;P46777;Q5T7N0;A0A2R8Y4A2	A0A2R8Y6J3;P46777;Q5T7N0	60S ribosomal protein L5	RPL5	tr|A0A2R8Y6J3|A0A2R8Y6J3_HUMAN 60S ribosomal protein L5 (Fragment) OS=Homo sapiens OX=9606 GN=RPL5 PE=1 SV=1;sp|P46777|RL5_HUMAN 60S ribosomal protein L5 OS=Homo sapiens OX=9606 GN=RPL5 PE=1 SV=3;tr|Q5T7N0|Q5T7N0_HUMAN 60S ribosomal protein L5 (Fragment) O	4	12	12	8	6	7	10	12	11	11	10	11	8	6	7	10	12	11	11	10	11	58.8	58.8	27.045	238	238;297;130;170	0	48.469	55.5	44.1	40.8	55.5	58.8	55.9	55.9	55.9	55.9	24860000000	245440000	93043000	376000000	3265700000	3097900000	2841800000	5125600000
Q13131;Q96E92;A0A087WXX9;P54646	Q13131	5-AMP-activated protein kinase catalytic subunit alpha-1	PRKAA1	sp|Q13131|AAPK1_HUMAN 5-AMP-activated protein kinase catalytic subunit alpha-1 OS=Homo sapiens OX=9606 GN=PRKAA1 PE=1 SV=4	4	14	14	0	0	0	1	1	0	9	10	9	0	0	0	1	1	0	9	10	9	32.9	32.9	64.009	559	559;207;552;552	0	48.463	0	0	0	3	1.8	0	20.6	24.5	22	1717300000	0	0	0	13462000	20311000	0	484110000
D6RFM5;P31040;A0A087X1I3;A0A494C1T6;H0Y8X1	D6RFM5;P31040;A0A087X1I3;A0A494C1T6	Succinate dehydrogenase [ubiquinone] flavoprotein subunit, mitochondrial	SDHA	tr|D6RFM5|D6RFM5_HUMAN Succinate dehydrogenase [ubiquinone] flavoprotein subunit, mitochondrial OS=Homo sapiens OX=9606 GN=SDHA PE=1 SV=1;sp|P31040|SDHA_HUMAN Succinate dehydrogenase [ubiquinone] flavoprotein subunit, mitochondrial OS=Homo sapiens OX=9606	5	12	12	1	1	1	6	2	3	6	3	10	1	1	1	6	2	3	6	3	10	36.4	36.4	63.566	583	583;664;519;356;126	0	48.46	2.6	2.6	2.6	19.9	5.5	10.3	21.1	12.7	30.5	1689000000	0	3451800	2686500	228370000	103060000	68939000	447640000
P00505	P00505	Aspartate aminotransferase, mitochondrial	GOT2	sp|P00505|AATM_HUMAN Aspartate aminotransferase, mitochondrial OS=Homo sapiens OX=9606 GN=GOT2 PE=1 SV=3	1	14	14	3	5	2	9	5	6	11	10	12	3	5	2	9	5	6	11	10	12	42.8	42.8	47.517	430	430	0	48.451	8.4	14.4	7.4	28.4	13	23.5	32.8	29.1	39.3	3665600000	67169000	80027000	15850000	555920000	243880000	359360000	887620000
Q8TC07;F8WCB5;F8WDJ1;F8WF35	Q8TC07	TBC1 domain family member 15	TBC1D15	sp|Q8TC07|TBC15_HUMAN TBC1 domain family member 15 OS=Homo sapiens OX=9606 GN=TBC1D15 PE=1 SV=2	4	15	7	0	0	0	3	8	6	9	10	7	0	0	0	1	3	4	4	5	3	24.9	12.6	79.49	691	691;124;72;85	0	48.254	0	0	0	4.8	11.9	9.8	16.1	15.3	12.9	1510600000	0	0	0	58296000	270900000	88962000	350410000
Q9P0V3	Q9P0V3	SH3 domain-binding protein 4	SH3BP4	sp|Q9P0V3|SH3B4_HUMAN SH3 domain-binding protein 4 OS=Homo sapiens OX=9606 GN=SH3BP4 PE=1 SV=1	1	18	18	0	0	0	12	9	8	12	14	13	0	0	0	12	9	8	12	14	13	26.3	26.3	107.49	963	963	0	48.058	0	0	0	18.7	11.8	11.1	18.4	21.5	18.7	3036100000	0	0	0	502260000	468200000	226740000	618760000
P49257	P49257	Protein ERGIC-53	LMAN1	sp|P49257|LMAN1_HUMAN Protein ERGIC-53 OS=Homo sapiens OX=9606 GN=LMAN1 PE=1 SV=2	1	12	12	0	0	0	8	10	6	7	7	9	0	0	0	8	10	6	7	7	9	41.6	41.6	57.548	510	510	0	48.033	0	0	0	27.5	33.5	23.7	26.9	29.8	32.7	3062100000	0	0	0	625270000	593900000	347880000	575660000
Q9Y285;K7ER00;K7ER16;K7EK06;K7EPH2	Q9Y285;K7ER00;K7ER16	Phenylalanine--tRNA ligase alpha subunit	FARSA	sp|Q9Y285|SYFA_HUMAN Phenylalanine--tRNA ligase alpha subunit OS=Homo sapiens OX=9606 GN=FARSA PE=1 SV=3;tr|K7ER00|K7ER00_HUMAN Phenylalanine--tRNA ligase alpha subunit OS=Homo sapiens OX=9606 GN=FARSA PE=1 SV=1;tr|K7ER16|K7ER16_HUMAN Phenylalanine--tRNA l	5	10	10	0	0	0	8	4	2	4	4	3	0	0	0	8	4	2	4	4	3	25.6	25.6	57.563	508	508;548;235;168;378	0	47.977	0	0	0	23.2	10.6	8.3	13.6	14	11.2	498750000	0	0	0	152720000	46262000	33313000	63668000
P13861;H7C1L0;H7C330;C9J830;H7C4A9	P13861	cAMP-dependent protein kinase type II-alpha regulatory subunit	PRKAR2A	sp|P13861|KAP2_HUMAN cAMP-dependent protein kinase type II-alpha regulatory subunit OS=Homo sapiens OX=9606 GN=PRKAR2A PE=1 SV=2	5	9	9	0	1	0	5	6	6	7	6	4	0	1	0	5	6	6	7	6	4	32.2	32.2	45.518	404	404;200;92;114;99	0	47.941	0	5	0	18.6	20.5	20.5	24.8	23.8	14.9	1053800000	0	0	0	129760000	224020000	143360000	286060000
Q86UP2;G3V4Y7;B7Z6P3;G3V5P0;H0YJV5;H0YJP2;H0YJZ8;G3V5G2	Q86UP2;G3V4Y7	Kinectin	KTN1	sp|Q86UP2|KTN1_HUMAN Kinectin OS=Homo sapiens OX=9606 GN=KTN1 PE=1 SV=1;tr|G3V4Y7|G3V4Y7_HUMAN Kinectin OS=Homo sapiens OX=9606 GN=KTN1 PE=1 SV=1	8	15	15	0	0	0	5	10	6	10	11	12	0	0	0	5	10	6	10	11	12	17.4	17.4	156.27	1357	1357;595;334;160;91;138;153;162	0	47.935	0	0	0	5.6	11.2	6.9	11.9	13.5	14.1	2717800000	0	0	0	292270000	389330000	208580000	528380000
P55884;C9JZG1;C9JQN7	P55884	Eukaryotic translation initiation factor 3 subunit B	EIF3B	sp|P55884|EIF3B_HUMAN Eukaryotic translation initiation factor 3 subunit B OS=Homo sapiens OX=9606 GN=EIF3B PE=1 SV=3	3	18	18	1	1	1	10	12	8	7	13	7	1	1	1	10	12	8	7	13	7	30.7	30.7	92.48	814	814;302;153	0	47.88	1.1	1.1	1.1	20.1	22.5	16	11.3	25.1	15.7	1784000000	0	0	6134700	292380000	381030000	220730000	255120000
E7EN19;E7ENQ1;G3XAA2;H7C360;G5E948;A0A0D9SEY1;O95819;C9J840;E7EX83;A0A0D9SG62;I3L2I2;A0A590UJE1;H7C0P6;C9J338	E7EN19;E7ENQ1;G3XAA2;H7C360;G5E948;A0A0D9SEY1;O95819;C9J840;E7EX83;A0A0D9SG62	Mitogen-activated protein kinase kinase kinase kinase 4	MAP4K4	tr|E7EN19|E7EN19_HUMAN Mitogen-activated protein kinase kinase kinase kinase 4 OS=Homo sapiens OX=9606 GN=MAP4K4 PE=1 SV=1;tr|E7ENQ1|E7ENQ1_HUMAN Mitogen-activated protein kinase kinase kinase kinase 4 OS=Homo sapiens OX=9606 GN=MAP4K4 PE=1 SV=1;tr|G3XAA2|	14	9	5	1	1	1	4	5	5	5	6	5	0	0	0	2	3	2	3	3	3	12.3	7.6	144.92	1272	1272;1154;1165;1170;1235;1320;1239;987;1038;1044;381;554;1056;350	0	47.787	0.9	0.9	0.9	5.7	6.2	4.5	5.7	7.5	5.7	1408800000	3926200	0	6939000	103550000	107140000	140320000	363230000
Q13347;Q5TFK1	Q13347	Eukaryotic translation initiation factor 3 subunit I	EIF3I	sp|Q13347|EIF3I_HUMAN Eukaryotic translation initiation factor 3 subunit I OS=Homo sapiens OX=9606 GN=EIF3I PE=1 SV=1	2	13	13	1	2	1	7	5	6	5	5	8	1	2	1	7	5	6	5	5	8	62.5	62.5	36.501	325	325;125	0	47.774	4	6.8	10.5	37.5	31.4	35.7	31.4	29.8	42.2	2277500000	0	8928500	6408100	380760000	317610000	225790000	457890000
Q9Y6C9	Q9Y6C9	Mitochondrial carrier homolog 2	MTCH2	sp|Q9Y6C9|MTCH2_HUMAN Mitochondrial carrier homolog 2 OS=Homo sapiens OX=9606 GN=MTCH2 PE=1 SV=1	1	8	2	0	1	0	6	4	5	7	7	6	0	0	0	1	1	1	1	2	1	37.6	9.2	33.331	303	303	0	47.721	0	5.3	0	32.3	23.4	25.4	35.3	30.7	32.3	3662700000	0	6536500	0	466520000	340870000	274590000	794610000
P63167;F8VXL2;F8VRV5;F8VXI7	P63167;F8VXL2;F8VRV5	Dynein light chain 1, cytoplasmic	DYNLL1	sp|P63167|DYL1_HUMAN Dynein light chain 1, cytoplasmic OS=Homo sapiens OX=9606 GN=DYNLL1 PE=1 SV=1;tr|F8VXL2|F8VXL2_HUMAN Dynein light chain OS=Homo sapiens OX=9606 GN=DYNLL1 PE=1 SV=1;tr|F8VRV5|F8VRV5_HUMAN Dynein light chain OS=Homo sapiens OX=9606 GN=DY	4	4	2	1	1	0	2	4	3	3	3	3	1	1	0	1	2	2	2	2	2	51.7	38.2	10.366	89	89;47;67;42	0	47.579	24.7	24.7	0	37.1	51.7	50.6	50.6	50.6	50.6	4140500000	20687000	7865000	0	424640000	598120000	543080000	770330000
P00533;E9PFD7;Q504U8;A0A1W2PRR9;C9JYS6;J3KTI5;H3BLT0;B4DTR1;J3QLU9;A0A0A0MSE1;P04626;Q15303	P00533;E9PFD7;Q504U8	Epidermal growth factor receptor;Receptor protein-tyrosine kinase	EGFR	sp|P00533|EGFR_HUMAN Epidermal growth factor receptor OS=Homo sapiens OX=9606 GN=EGFR PE=1 SV=2;tr|E9PFD7|E9PFD7_HUMAN Receptor protein-tyrosine kinase OS=Homo sapiens OX=9606 GN=EGFR PE=1 SV=3;tr|Q504U8|Q504U8_HUMAN Receptor protein-tyrosine kinase OS=Hom	12	14	14	0	0	0	10	6	5	9	11	6	0	0	0	10	6	5	9	11	6	18.2	18.2	134.28	1210	1210;1165;1091;464;128;251;731;979;1055;1266;1255;1308	0	47.484	0	0	0	13	8.3	5.1	13.6	14.6	7.5	1370100000	0	0	0	266680000	194780000	137400000	283110000
P08243;F8WEJ5;C9JT45;C9J057;C9JM09;C9JLN6	P08243;F8WEJ5	Asparagine synthetase [glutamine-hydrolyzing]	ASNS	sp|P08243|ASNS_HUMAN Asparagine synthetase [glutamine-hydrolyzing] OS=Homo sapiens OX=9606 GN=ASNS PE=1 SV=4;tr|F8WEJ5|F8WEJ5_HUMAN Asparagine synthetase [glutamine-hydrolyzing] OS=Homo sapiens OX=9606 GN=ASNS PE=1 SV=1	6	9	9	0	0	0	7	6	5	8	8	8	0	0	0	7	6	5	8	8	8	25	25	64.369	561	561;401;162;214;118;63	0	47.362	0	0	0	19.1	12.3	10.2	20.5	21.2	23.2	1817800000	0	0	0	169620000	295170000	194630000	378570000
Q01650;H0YJ95;A0A0C4DGL4;G3V4Z6;Q9UM01	Q01650	Large neutral amino acids transporter small subunit 1	SLC7A5	sp|Q01650|LAT1_HUMAN Large neutral amino acids transporter small subunit 1 OS=Homo sapiens OX=9606 GN=SLC7A5 PE=1 SV=2	5	5	4	1	2	1	5	3	2	3	3	2	1	2	1	4	2	2	2	2	2	11.2	9.9	55.01	507	507;168;241;245;511	0	47.357	2.8	6.3	2.8	11.2	8.1	6.7	8.1	7.7	6.7	1865000000	3774000	10251000	1171400	273820000	290500000	264010000	396150000
P10155;H0Y9N5;G5E9R9;D6RDN1;D6RE09	P10155	60 kDa SS-A/Ro ribonucleoprotein	TROVE2	sp|P10155|RO60_HUMAN 60 kDa SS-A/Ro ribonucleoprotein OS=Homo sapiens OX=9606 GN=RO60 PE=1 SV=2	5	12	12	0	0	0	4	6	3	8	7	6	0	0	0	4	6	3	8	7	6	30.3	30.3	60.67	538	538;193;263;41;66	0	47.23	0	0	0	9.5	13.6	5.9	21	17.7	13.6	1085600000	0	0	0	45417000	159780000	49367000	322180000
P42166	P42166	Lamina-associated polypeptide 2, isoform alpha;Thymopoietin;Thymopentin	TMPO	sp|P42166|LAP2A_HUMAN Lamina-associated polypeptide 2, isoform alpha OS=Homo sapiens OX=9606 GN=TMPO PE=1 SV=2	1	15	10	0	0	0	7	7	6	10	14	9	0	0	0	4	4	3	6	9	6	37.6	24.6	75.491	694	694	0	47.226	0	0	0	18.4	17.3	14.1	24.2	36.2	23.6	1751800000	0	0	0	189410000	172950000	154140000	417840000
P53367	P53367	Arfaptin-1	ARFIP1	sp|P53367|ARFP1_HUMAN Arfaptin-1 OS=Homo sapiens OX=9606 GN=ARFIP1 PE=1 SV=2	1	10	10	0	0	0	6	6	4	8	8	7	0	0	0	6	6	4	8	8	7	35.9	35.9	41.738	373	373	0	47.145	0	0	0	21.7	23.6	16.1	32.2	31.6	28.7	1414100000	0	0	0	198300000	180650000	129690000	295000000
Q6P2Q9;I3L0J9;I3L3Z8	Q6P2Q9	Pre-mRNA-processing-splicing factor 8	PRPF8	sp|Q6P2Q9|PRP8_HUMAN Pre-mRNA-processing-splicing factor 8 OS=Homo sapiens OX=9606 GN=PRPF8 PE=1 SV=2	3	23	23	0	0	0	10	7	6	12	11	14	0	0	0	10	7	6	12	11	14	14.6	14.6	273.6	2335	2335;1012;250	0	47.117	0	0	0	7	3.5	3.4	7.3	6.7	8.4	1173300000	0	0	0	193580000	160860000	88381000	274080000
Q01995;H0YCU9;E9PJ32	Q01995;H0YCU9	Transgelin	TAGLN	sp|Q01995|TAGL_HUMAN Transgelin OS=Homo sapiens OX=9606 GN=TAGLN PE=1 SV=4;tr|H0YCU9|H0YCU9_HUMAN Transgelin (Fragment) OS=Homo sapiens OX=9606 GN=TAGLN PE=1 SV=1	3	14	14	8	7	6	9	7	7	7	6	7	8	7	6	9	7	7	7	6	7	74.6	74.6	22.611	201	201;151;91	0	47.013	40.8	42.3	29.4	49.8	38.3	38.3	33.3	37.8	36.8	7250400000	268290000	334440000	377920000	1311200000	1077700000	736790000	1144700000
Q5H909;Q9UNF1;Q5H907	Q5H909;Q9UNF1;Q5H907	Melanoma-associated antigen D2	MAGED2	tr|Q5H909|Q5H909_HUMAN Melanoma-associated antigen D2 OS=Homo sapiens OX=9606 GN=MAGED2 PE=1 SV=2;sp|Q9UNF1|MAGD2_HUMAN Melanoma-associated antigen D2 OS=Homo sapiens OX=9606 GN=MAGED2 PE=1 SV=2;tr|Q5H907|Q5H907_HUMAN Melanoma antigen family D, 2, isoform	3	12	11	3	4	3	9	5	6	4	8	6	3	4	3	8	4	5	4	7	5	35.5	33.5	63.138	588	588;606;521	0	46.955	12.1	14.1	7.7	27.7	14.1	18.2	14.8	20.7	20.6	1104000000	30016000	31404000	22212000	156830000	159190000	161180000	76156000
H0YNW5;H0YKC5;P33316;A0A0C4DGL3;H0YMP1	H0YNW5;H0YKC5;P33316;A0A0C4DGL3;H0YMP1	Deoxyuridine 5-triphosphate nucleotidohydrolase, mitochondrial	DUT	tr|H0YNW5|H0YNW5_HUMAN Deoxyuridine 5-triphosphate nucleotidohydrolase, mitochondrial OS=Homo sapiens OX=9606 GN=DUT PE=1 SV=1;tr|H0YKC5|H0YKC5_HUMAN Deoxyuridine 5-triphosphate nucleotidohydrolase, mitochondrial (Fragment) OS=Homo sapiens OX=9606 GN=DUT	5	6	2	0	0	0	4	2	5	2	3	3	0	0	0	1	0	2	1	1	1	46.7	15	17.827	167	167;221;252;141;107	0	46.853	0	0	0	32.9	15.6	38.3	18.6	25.7	25.7	494480000	0	0	0	71234000	56216000	21041000	109780000
P07954	P07954	Fumarate hydratase, mitochondrial	FH	sp|P07954|FUMH_HUMAN Fumarate hydratase, mitochondrial OS=Homo sapiens OX=9606 GN=FH PE=1 SV=3	1	9	9	2	1	2	4	4	4	6	7	5	2	1	2	4	4	4	6	7	5	34.5	34.5	54.636	510	510	0	46.766	6.3	3.5	6.3	16.5	14.9	16.5	25.1	27.5	19.4	1404700000	21639000	3821600	13698000	176400000	225360000	154100000	260170000
Q3ZCM7;A0A075B736;Q5SQY0	Q3ZCM7;A0A075B736;Q5SQY0	Tubulin beta-8 chain	TUBB8	sp|Q3ZCM7|TBB8_HUMAN Tubulin beta-8 chain OS=Homo sapiens OX=9606 GN=TUBB8 PE=1 SV=2;tr|A0A075B736|A0A075B736_HUMAN Tubulin beta chain OS=Homo sapiens OX=9606 GN=TUBB8 PE=1 SV=1;tr|Q5SQY0|Q5SQY0_HUMAN Tubulin beta chain OS=Homo sapiens OX=9606 GN=TUBB8 PE=	3	11	2	8	6	7	10	10	11	10	11	11	2	1	2	2	2	2	2	2	2	24.5	7.4	49.775	444	444;407;410	0	46.725	20.7	17.3	20.5	22.7	22.5	24.5	22.7	24.5	24.5	41549000000	78590000	39137000	107420000	6035900000	5245400000	5027000000	6695100000
Q9HD45;Q5TB53	Q9HD45;Q5TB53	Transmembrane 9 superfamily member 3	TM9SF3	sp|Q9HD45|TM9S3_HUMAN Transmembrane 9 superfamily member 3 OS=Homo sapiens OX=9606 GN=TM9SF3 PE=1 SV=2;tr|Q5TB53|Q5TB53_HUMAN Transmembrane 9 superfamily member (Fragment) OS=Homo sapiens OX=9606 GN=TM9SF3 PE=1 SV=8	2	12	12	0	0	1	9	8	8	7	11	6	0	0	1	9	8	8	7	11	6	23.6	23.6	67.887	589	589;253	0	46.509	0	0	1.9	17.8	15.8	18.5	15.4	19.2	16.6	4531700000	0	0	3037900	542240000	505080000	474580000	875290000
A0A087WUC6;E9PI68;Q15005;E9PRB9;E9PL01;H0YE04	A0A087WUC6;E9PI68;Q15005;E9PRB9;E9PL01	Signal peptidase complex subunit 2	SPCS2	tr|A0A087WUC6|A0A087WUC6_HUMAN Signal peptidase complex subunit 2 OS=Homo sapiens OX=9606 GN=SPCS2 PE=1 SV=1;tr|E9PI68|E9PI68_HUMAN Signal peptidase complex subunit 2 OS=Homo sapiens OX=9606 GN=SPCS2 PE=1 SV=1;sp|Q15005|SPCS2_HUMAN Signal peptidase complex	6	6	6	0	0	0	4	4	2	3	5	3	0	0	0	4	4	2	3	5	3	25.1	25.1	25.09	227	227;257;226;87;157;166	0	46.223	0	0	0	24.2	21.6	12.8	13.2	22	16.7	805170000	0	0	0	131730000	148340000	31257000	131720000
Q86VI3;F2Z2E2	Q86VI3;F2Z2E2	Ras GTPase-activating-like protein IQGAP3	IQGAP3	sp|Q86VI3|IQGA3_HUMAN Ras GTPase-activating-like protein IQGAP3 OS=Homo sapiens OX=9606 GN=IQGAP3 PE=1 SV=2;tr|F2Z2E2|F2Z2E2_HUMAN Ras GTPase-activating-like protein IQGAP3 OS=Homo sapiens OX=9606 GN=IQGAP3 PE=1 SV=1	2	19	17	0	1	0	9	6	3	12	11	6	0	0	0	9	5	3	11	10	5	15.1	14.1	184.7	1631	1631;1588	0	46.184	0	0.5	0	8	5.8	2.8	10.5	10.2	5.2	670300000	0	0	0	119050000	55578000	36118000	222810000
Q6NZI2	Q6NZI2	Polymerase I and transcript release factor	PTRF	sp|Q6NZI2|CAVN1_HUMAN Caveolae-associated protein 1 OS=Homo sapiens OX=9606 GN=CAVIN1 PE=1 SV=1	1	10	10	1	0	0	5	5	5	6	6	6	1	0	0	5	5	5	6	6	6	30.8	30.8	43.476	390	390	0	46.181	4.4	0	0	19	20	21	24.9	21.3	21	2056600000	0	0	0	280090000	253720000	221780000	458610000
P46734;J3KRV4;E9PRZ0;J3QR49;P52564	P46734	Dual specificity mitogen-activated protein kinase kinase 3	MAP2K3	sp|P46734|MP2K3_HUMAN Dual specificity mitogen-activated protein kinase kinase 3 OS=Homo sapiens OX=9606 GN=MAP2K3 PE=1 SV=2	5	6	6	0	0	0	4	4	2	2	5	4	0	0	0	4	4	2	2	5	4	24.8	24.8	39.318	347	347;136;160;173;334	0	46.052	0	0	0	16.1	16.1	8.1	8.9	20.7	16.7	623050000	0	0	0	100730000	101260000	19480000	74915000
P46977;A0A0C4DH80;E9PN73;E9PI32	P46977	Dolichyl-diphosphooligosaccharide--protein glycosyltransferase subunit STT3A	STT3A	sp|P46977|STT3A_HUMAN Dolichyl-diphosphooligosaccharide--protein glycosyltransferase subunit STT3A OS=Homo sapiens OX=9606 GN=STT3A PE=1 SV=2	4	13	12	0	0	1	8	8	9	10	9	9	0	0	1	8	8	8	9	9	9	20.1	19.1	80.529	705	705;102;117;119	0	45.957	0	0	1.7	11.9	11.8	12.1	13.9	10.4	14.2	11480000000	0	0	7840900	1185700000	1699700000	1234600000	2184400000
P15880;H0YEN5;E9PQD7;I3L404;E9PM36;E9PMM9;E9PPT0;H3BNG3;H0YE27	P15880;H0YEN5;E9PQD7;I3L404;E9PM36;E9PMM9	40S ribosomal protein S2	RPS2	sp|P15880|RS2_HUMAN 40S ribosomal protein S2 OS=Homo sapiens OX=9606 GN=RPS2 PE=1 SV=2;tr|H0YEN5|H0YEN5_HUMAN 40S ribosomal protein S2 (Fragment) OS=Homo sapiens OX=9606 GN=RPS2 PE=1 SV=1;tr|E9PQD7|E9PQD7_HUMAN 40S ribosomal protein S2 OS=Homo sapiens OX=9	9	13	13	6	4	4	10	11	10	11	10	10	6	4	4	10	11	10	11	10	10	43.7	43.7	31.324	293	293;195;235;155;209;218;197;44;63	0	45.911	25.3	13.3	16.4	33.1	36.5	33.1	36.5	33.1	37.5	23486000000	134300000	47750000	106860000	3673500000	3473600000	3121400000	4100700000
O95197;F5H891;F5GWG7;F5H617	O95197	Reticulon-3	RTN3	sp|O95197|RTN3_HUMAN Reticulon-3 OS=Homo sapiens OX=9606 GN=RTN3 PE=1 SV=2	4	4	3	0	1	0	3	3	3	3	3	4	0	1	0	2	2	2	2	2	3	6.1	2.3	112.61	1032	1032;130;136;185	0	45.878	0	1.1	0	5	5	5	5	5	6.1	12702000000	0	10716000	0	1724300000	1770000000	1536200000	2397900000
Q9Y6D6;E5RIF2;E5RHL7;E5RHZ1	Q9Y6D6;E5RIF2	Brefeldin A-inhibited guanine nucleotide-exchange protein 1	ARFGEF1	sp|Q9Y6D6|BIG1_HUMAN Brefeldin A-inhibited guanine nucleotide-exchange protein 1 OS=Homo sapiens OX=9606 GN=ARFGEF1 PE=1 SV=2;tr|E5RIF2|E5RIF2_HUMAN Brefeldin A-inhibited guanine nucleotide-exchange protein 1 (Fragment) OS=Homo sapiens OX=9606 GN=ARFGEF1 P	4	24	16	0	0	0	12	14	8	15	16	13	0	0	0	7	12	5	11	11	9	18.8	13.2	208.76	1849	1849;1279;825;192	0	45.765	0	0	0	8.3	10.7	6	12.4	12.8	10.2	1674300000	0	0	0	335200000	308380000	98454000	290600000
Q9Y4R8;H3BRS3;H3BU45	Q9Y4R8;H3BRS3	Telomere length regulation protein TEL2 homolog	TELO2	sp|Q9Y4R8|TELO2_HUMAN Telomere length regulation protein TEL2 homolog OS=Homo sapiens OX=9606 GN=TELO2 PE=1 SV=2;tr|H3BRS3|H3BRS3_HUMAN Telomere length regulation protein TEL2 homolog OS=Homo sapiens OX=9606 GN=TELO2 PE=1 SV=1	3	16	16	0	0	0	8	3	7	6	7	9	0	0	0	8	3	7	6	7	9	27.1	27.1	91.746	837	837;426;160	0	45.716	0	0	0	11.4	4.2	13.4	8.5	12.2	16	1018400000	0	0	0	166280000	72878000	145760000	200200000
Q13561;H0YI98;F8W1I6;H0YHL1;F8VRV7;F8VW18;F8VX93	Q13561;H0YI98;F8W1I6	Dynactin subunit 2	DCTN2	sp|Q13561|DCTN2_HUMAN Dynactin subunit 2 OS=Homo sapiens OX=9606 GN=DCTN2 PE=1 SV=4;tr|H0YI98|H0YI98_HUMAN Dynactin subunit 2 (Fragment) OS=Homo sapiens OX=9606 GN=DCTN2 PE=1 SV=1;tr|F8W1I6|F8W1I6_HUMAN Dynactin subunit 2 OS=Homo sapiens OX=9606 GN=DCTN2 P	7	8	8	0	0	1	5	6	4	4	6	3	0	0	1	5	6	4	4	6	3	27.4	27.4	44.23	401	401;268;315;128;152;278;135	0	45.69	0	0	3.7	16	20.4	12.5	13.5	19.5	11.2	844440000	0	0	5045900	120890000	119490000	83879000	157410000
A0A0A0MTN0;Q13617;Q5T2B5;Q5T2B7	A0A0A0MTN0;Q13617;Q5T2B5	Cullin-2	CUL2	tr|A0A0A0MTN0|A0A0A0MTN0_HUMAN Cullin-2 OS=Homo sapiens OX=9606 GN=CUL2 PE=1 SV=1;sp|Q13617|CUL2_HUMAN Cullin-2 OS=Homo sapiens OX=9606 GN=CUL2 PE=1 SV=2;tr|Q5T2B5|Q5T2B5_HUMAN Cullin-2 OS=Homo sapiens OX=9606 GN=CUL2 PE=1 SV=1	4	19	19	0	0	0	10	9	8	13	15	17	0	0	0	10	9	8	13	15	17	32.1	32.1	88.505	758	758;745;706;90	0	45.677	0	0	0	19.3	15.2	15.3	20.8	23.7	29.7	3347100000	0	0	0	359320000	306040000	187460000	743850000
H3BNC9;P08708;H0YN88;A0A075B716;H0YN73;A0A0J9YYC4	H3BNC9;P08708;H0YN88;A0A075B716	40S ribosomal protein S17	RPS17	tr|H3BNC9|H3BNC9_HUMAN Uncharacterized protein OS=Homo sapiens OX=9606 PE=3 SV=2;sp|P08708|RS17_HUMAN 40S ribosomal protein S17 OS=Homo sapiens OX=9606 GN=RPS17 PE=1 SV=2;tr|H0YN88|H0YN88_HUMAN 40S ribosomal protein S17 OS=Homo sapiens OX=9606 GN=RPS17 PE=	6	8	8	4	3	2	7	7	6	8	7	6	4	3	2	7	7	6	8	7	6	13.9	13.9	64.532	584	584;135;136;191;59;293	0	45.654	9.9	8.2	8.2	12.2	12.2	12.2	13.9	12.2	12.2	13729000000	169140000	62875000	88160000	2276100000	1999800000	1276200000	3068200000
Q9HCS7	Q9HCS7	Pre-mRNA-splicing factor SYF1	XAB2	sp|Q9HCS7|SYF1_HUMAN Pre-mRNA-splicing factor SYF1 OS=Homo sapiens OX=9606 GN=XAB2 PE=1 SV=2	1	9	9	0	0	0	5	8	6	7	7	3	0	0	0	5	8	6	7	7	3	13.9	13.9	100.01	855	855	0	45.63	0	0	0	7.3	12.2	9.2	10.9	10.6	3.6	703790000	0	0	0	97894000	91141000	103620000	180950000
Q13451	Q13451	Peptidyl-prolyl cis-trans isomerase FKBP5;Peptidyl-prolyl cis-trans isomerase FKBP5, N-terminally processed	FKBP5	sp|Q13451|FKBP5_HUMAN Peptidyl-prolyl cis-trans isomerase FKBP5 OS=Homo sapiens OX=9606 GN=FKBP5 PE=1 SV=2	1	13	13	0	1	1	8	4	3	9	6	4	0	1	1	8	4	3	9	6	4	37.6	37.6	51.212	457	457	0	45.622	0	2.2	3.5	28.2	14.9	13.3	32.4	22.3	15.3	1349300000	0	1868500	8312400	263930000	229960000	59011000	374960000
H0YGW7;Q8NE71;A0A0G2JIC2;Q5STZ8	H0YGW7;Q8NE71	ATP-binding cassette sub-family F member 1	ABCF1	tr|H0YGW7|H0YGW7_HUMAN ATP-binding cassette sub-family F member 1 (Fragment) OS=Homo sapiens OX=9606 GN=ABCF1 PE=1 SV=1;sp|Q8NE71|ABCF1_HUMAN ATP-binding cassette sub-family F member 1 OS=Homo sapiens OX=9606 GN=ABCF1 PE=1 SV=2	4	10	10	0	0	0	7	5	4	5	5	2	0	0	0	7	5	4	5	5	2	19.8	19.8	67.55	596	596;845;238;339	0	45.307	0	0	0	15.3	9.9	8.9	9.9	9.9	4.2	771270000	0	0	0	143740000	222060000	86586000	116340000
A0A286YEY1;P01876;A0A0G2JMB2;A0A286YEY5;P01877	A0A286YEY1;P01876	Ig alpha-1 chain C region	IGHA1	tr|A0A286YEY1|A0A286YEY1_HUMAN Immunoglobulin heavy constant alpha 1 (Fragment) OS=Homo sapiens OX=9606 GN=IGHA1 PE=1 SV=1;sp|P01876|IGHA1_HUMAN Immunoglobulin heavy constant alpha 1 OS=Homo sapiens OX=9606 GN=IGHA1 PE=1 SV=2	5	5	5	4	2	1	0	0	0	0	0	0	4	2	1	0	0	0	0	0	0	15.8	15.8	42.848	398	398;353;340;391;340	0	45.183	13.3	6	2.5	0	0	0	0	0	0	25114000	6552700	6378000	12184000	0	0	0	0
Q15691	Q15691	Microtubule-associated protein RP/EB family member 1	MAPRE1	sp|Q15691|MARE1_HUMAN Microtubule-associated protein RP/EB family member 1 OS=Homo sapiens OX=9606 GN=MAPRE1 PE=1 SV=3	1	9	8	2	3	4	8	8	6	7	7	6	2	3	4	7	7	5	7	6	6	49.6	49.6	29.999	268	268	0	45.175	13.4	20.5	20.9	46.6	41	30.2	41	37.3	34.3	1987400000	10195000	18565000	24359000	380140000	279410000	99946000	483810000
Q7L1Q6;C9IZ80;H0Y503;C9JFN4;C9J188;C9JWF5;C9JV57	Q7L1Q6;C9IZ80	Basic leucine zipper and W2 domain-containing protein 1	BZW1	sp|Q7L1Q6|BZW1_HUMAN Basic leucine zipper and W2 domain-containing protein 1 OS=Homo sapiens OX=9606 GN=BZW1 PE=1 SV=1;tr|C9IZ80|C9IZ80_HUMAN Basic leucine zipper and W2 domain-containing protein 1 (Fragment) OS=Homo sapiens OX=9606 GN=BZW1 PE=1 SV=1	7	21	19	0	0	0	13	14	12	14	14	17	0	0	0	12	13	11	13	13	15	40.1	37	48.043	419	419;294;135;216;154;161;116	0	45.136	0	0	0	31.3	32	31.3	34.1	33.2	35.3	34412000000	0	0	0	5991400000	4459100000	4064800000	5671400000
P50281;F8W1B7	P50281	Matrix metalloproteinase-14	MMP14	sp|P50281|MMP14_HUMAN Matrix metalloproteinase-14 OS=Homo sapiens OX=9606 GN=MMP14 PE=1 SV=3	2	8	8	0	0	0	5	6	4	6	5	5	0	0	0	5	6	4	6	5	5	15.5	15.5	65.893	582	582;194	0	45.091	0	0	0	8.9	10.5	7.4	10.8	10.3	10.7	1662700000	0	0	0	256260000	246700000	173640000	392130000
Q15366;H3BSS4	Q15366	Poly(rC)-binding protein 2	PCBP2	sp|Q15366|PCBP2_HUMAN Poly(rC)-binding protein 2 OS=Homo sapiens OX=9606 GN=PCBP2 PE=1 SV=1	2	13	2	5	5	3	10	8	7	8	8	9	0	0	0	2	2	2	2	2	2	56.7	6.3	38.58	365	365;184	0	44.945	19.7	20.3	11.5	41.6	35.1	26.6	33.2	33.2	40.8	6608600000	68138000	70787000	12318000	1181800000	1173500000	888950000	1214600000
C9JFM5;Q12846;A0A087WWW0;H3BMK2	C9JFM5;Q12846;A0A087WWW0	Syntaxin-4	STX4	tr|C9JFM5|C9JFM5_HUMAN Syntaxin-4 (Fragment) OS=Homo sapiens OX=9606 GN=STX4 PE=1 SV=1;sp|Q12846|STX4_HUMAN Syntaxin-4 OS=Homo sapiens OX=9606 GN=STX4 PE=1 SV=2;tr|A0A087WWW0|A0A087WWW0_HUMAN Syntaxin-4 (Fragment) OS=Homo sapiens OX=9606 GN=STX4 PE=1 SV=1	4	3	3	0	0	0	2	2	2	1	2	2	0	0	0	2	2	2	1	2	2	23.4	23.4	19.782	175	175;297;115;64	0	44.803	0	0	0	17.1	17.1	17.1	10.9	17.1	17.1	198190000	0	0	0	41051000	31954000	22050000	44603000
Q8N2F6;A0A0J9YWR7;H7BXQ8;A0A0J9YXE4;A0A0J9YY38;A0A0J9YXV5;H7C2M7;C9J5N7	Q8N2F6;A0A0J9YWR7;H7BXQ8;A0A0J9YXE4	Armadillo repeat-containing protein 10	ARMC10	sp|Q8N2F6|ARM10_HUMAN Armadillo repeat-containing protein 10 OS=Homo sapiens OX=9606 GN=ARMC10 PE=1 SV=1;tr|A0A0J9YWR7|A0A0J9YWR7_HUMAN Armadillo repeat-containing protein 10 (Fragment) OS=Homo sapiens OX=9606 GN=ARMC10 PE=1 SV=1;tr|H7BXQ8|H7BXQ8_HUMAN Arm	8	3	3	0	0	0	2	3	1	2	3	2	0	0	0	2	3	1	2	3	2	15.5	15.5	37.54	343	343;153;193;212;62;91;185;233	0	44.773	0	0	0	10.5	15.5	5.5	10.5	15.5	10.5	454300000	0	0	0	61672000	41733000	13539000	137060000
Q5UIP0;H7BZN3	Q5UIP0;H7BZN3	Telomere-associated protein RIF1	RIF1	sp|Q5UIP0|RIF1_HUMAN Telomere-associated protein RIF1 OS=Homo sapiens OX=9606 GN=RIF1 PE=1 SV=2;tr|H7BZN3|H7BZN3_HUMAN Telomere-associated protein RIF1 (Fragment) OS=Homo sapiens OX=9606 GN=RIF1 PE=1 SV=1	2	14	14	0	0	0	6	6	3	8	10	5	0	0	0	6	6	3	8	10	5	8.9	8.9	274.46	2472	2472;845	0	44.693	0	0	0	4	4.2	1.9	5.3	5.9	3.4	1134200000	0	0	0	250230000	141110000	79468000	214210000
A0A0C4DFL7;Q16850;H7C0D0	A0A0C4DFL7;Q16850	Lanosterol 14-alpha demethylase	CYP51A1	tr|A0A0C4DFL7|A0A0C4DFL7_HUMAN Lanosterol 14-alpha demethylase OS=Homo sapiens OX=9606 GN=CYP51A1 PE=1 SV=1;sp|Q16850|CP51A_HUMAN Lanosterol 14-alpha demethylase OS=Homo sapiens OX=9606 GN=CYP51A1 PE=1 SV=3	3	7	6	1	1	0	6	3	3	5	6	4	1	1	0	5	2	2	4	5	3	18.3	15.9	57.278	509	509;503;222	0	44.594	2.4	2.4	0	16.5	7.7	7.7	11.6	16.7	12.6	771070000	0	0	0	105430000	89518000	63627000	197850000
A0A087WY55;Q9NP79;Q5TGM0	A0A087WY55;Q9NP79;Q5TGM0	Vacuolar protein sorting-associated protein VTA1 homolog	VTA1	tr|A0A087WY55|A0A087WY55_HUMAN Chromosome 6 open reading frame 55, isoform CRA_b OS=Homo sapiens OX=9606 GN=VTA1 PE=1 SV=1;sp|Q9NP79|VTA1_HUMAN Vacuolar protein sorting-associated protein VTA1 homolog OS=Homo sapiens OX=9606 GN=VTA1 PE=1 SV=1;tr|Q5TGM0|Q5T	3	4	4	0	0	0	2	3	2	4	4	4	0	0	0	2	3	2	4	4	4	20.4	20.4	31.102	280	280;307;249	0	44.455	0	0	0	10.7	13.2	9.6	20.4	20.4	20.4	740260000	0	0	0	151140000	88897000	10242000	136630000
P35998;C9JLS9	P35998	26S protease regulatory subunit 7	PSMC2	sp|P35998|PRS7_HUMAN 26S proteasome regulatory subunit 7 OS=Homo sapiens OX=9606 GN=PSMC2 PE=1 SV=3	2	15	15	1	2	0	7	7	3	8	5	6	1	2	0	7	7	3	8	5	6	45.5	45.5	48.633	433	433;130	0	44.393	2.5	5.1	0	26.8	24.2	11.1	30.9	16.6	25.2	1327500000	0	12362000	0	260480000	315380000	49619000	394960000
P05198;G3V4T5;H0YJS4	P05198;G3V4T5;H0YJS4	Eukaryotic translation initiation factor 2 subunit 1	EIF2S1	sp|P05198|IF2A_HUMAN Eukaryotic translation initiation factor 2 subunit 1 OS=Homo sapiens OX=9606 GN=EIF2S1 PE=1 SV=3;tr|G3V4T5|G3V4T5_HUMAN Eukaryotic translation initiation factor 2 subunit 1 (Fragment) OS=Homo sapiens OX=9606 GN=EIF2S1 PE=1 SV=1;tr|H0YJ	3	13	13	2	1	1	10	10	10	8	9	8	2	1	1	10	10	10	8	9	8	54.9	54.9	36.112	315	315;273;252	0	44.373	8.6	3.8	3.8	43.8	45.4	43.5	30.2	39	40.6	4446400000	32116000	18498000	32100000	862760000	709090000	458530000	908240000
Q14847;C9J9W2;F6S2S5;K7ESD6	Q14847;C9J9W2	LIM and SH3 domain protein 1	LASP1	sp|Q14847|LASP1_HUMAN LIM and SH3 domain protein 1 OS=Homo sapiens OX=9606 GN=LASP1 PE=1 SV=2;tr|C9J9W2|C9J9W2_HUMAN LIM and SH3 domain protein 1 (Fragment) OS=Homo sapiens OX=9606 GN=LASP1 PE=1 SV=1	4	5	5	2	2	1	3	3	3	3	3	3	2	2	1	3	3	3	3	3	3	19.5	19.5	29.717	261	261;166;91;71	0	44.304	10.3	7.7	5	11.5	16.1	16.1	16.1	16.1	16.1	1081800000	7727000	11892000	9209600	155190000	123640000	127260000	217910000
P30086	P30086	Phosphatidylethanolamine-binding protein 1;Hippocampal cholinergic neurostimulating peptide	PEBP1	sp|P30086|PEBP1_HUMAN Phosphatidylethanolamine-binding protein 1 OS=Homo sapiens OX=9606 GN=PEBP1 PE=1 SV=3	1	6	6	3	2	4	5	5	5	6	5	6	3	2	4	5	5	5	6	5	6	53.5	53.5	21.057	187	187	0	44.302	26.2	18.2	43.3	52.9	52.9	52.9	53.5	52.9	53.5	2957800000	24686000	21711000	72420000	342450000	370050000	403710000	607830000
Q66K14;G3V133;H0YB08;Q6ZT07;E5RIN2	Q66K14	TBC1 domain family member 9B	TBC1D9B	sp|Q66K14|TBC9B_HUMAN TBC1 domain family member 9B OS=Homo sapiens OX=9606 GN=TBC1D9B PE=1 SV=3	5	21	21	0	0	0	13	9	7	9	13	10	0	0	0	13	9	7	9	13	10	24.5	24.5	140.52	1250	1250;409;166;1266;100	0	44.174	0	0	0	16.5	10.2	10.4	8.6	15	10.6	1438600000	0	0	0	377810000	133630000	159590000	239570000
P13797;A0A0A0MSQ0;H7C4N2;U3KQI3;P13796;C9JAM8;F2Z2Z9;Q5TBN3	P13797;A0A0A0MSQ0	Plastin-3	PLS3	sp|P13797|PLST_HUMAN Plastin-3 OS=Homo sapiens OX=9606 GN=PLS3 PE=1 SV=4;tr|A0A0A0MSQ0|A0A0A0MSQ0_HUMAN Plastin-3 OS=Homo sapiens OX=9606 GN=PLS3 PE=1 SV=1	8	18	15	2	1	1	13	9	8	13	6	10	2	1	1	11	7	6	11	4	8	37	32.9	70.81	630	630;617;190;164;627;266;42;246	0	44.168	5.4	2.1	1.9	29	20.8	17.6	27.3	13.2	19.8	2725400000	15792000	0	16022000	517390000	216900000	255390000	853420000
O00469;E7ETU9;C9JXZ0;F8WEW3	O00469;E7ETU9	Procollagen-lysine,2-oxoglutarate 5-dioxygenase 2	PLOD2	sp|O00469|PLOD2_HUMAN Procollagen-lysine,2-oxoglutarate 5-dioxygenase 2 OS=Homo sapiens OX=9606 GN=PLOD2 PE=1 SV=2;tr|E7ETU9|E7ETU9_HUMAN Procollagen-lysine,2-oxoglutarate 5-dioxygenase 2 OS=Homo sapiens OX=9606 GN=PLOD2 PE=1 SV=1	4	12	12	1	1	0	9	10	6	8	8	7	1	1	0	9	10	6	8	8	7	20.5	20.5	84.685	737	737;703;229;98	0	44.151	1.9	1.9	0	16.4	17.6	11.1	14.4	14.2	13	1904600000	0	0	0	222350000	295300000	174210000	441800000
A0A087WUL2;P49720;A0A087WXQ8;A0A087WY10	A0A087WUL2;P49720;A0A087WXQ8;A0A087WY10	Proteasome subunit beta type-3	PSMB3	tr|A0A087WUL2|A0A087WUL2_HUMAN Proteasome subunit beta type-3 (Fragment) OS=Homo sapiens OX=9606 GN=PSMB3 PE=1 SV=1;sp|P49720|PSB3_HUMAN Proteasome subunit beta type-3 OS=Homo sapiens OX=9606 GN=PSMB3 PE=1 SV=2;tr|A0A087WXQ8|A0A087WXQ8_HUMAN Proteasome sub	4	4	4	1	0	1	4	2	1	3	3	2	1	0	1	4	2	1	3	3	2	37.9	37.9	16.161	145	145;205;107;112	0	44.144	12.4	0	12.4	37.9	23.4	12.4	33.1	33.1	22.1	1586500000	17140000	0	12680000	357100000	160220000	98027000	313520000
A0A499FI31;Q15020;A0A494C0L2;F8W667;F8VVK9;H0YHU8;F8VZM2	A0A499FI31;Q15020	Squamous cell carcinoma antigen recognized by T-cells 3	SART3	tr|A0A499FI31|A0A499FI31_HUMAN Squamous cell carcinoma antigen recognized by T-cells 3 OS=Homo sapiens OX=9606 GN=SART3 PE=1 SV=1;sp|Q15020|SART3_HUMAN Squamous cell carcinoma antigen recognized by T-cells 3 OS=Homo sapiens OX=9606 GN=SART3 PE=1 SV=1	7	12	12	0	0	0	8	6	4	6	9	7	0	0	0	8	6	4	6	9	7	16.9	16.9	111.96	981	981;963;263;305;111;144;156	0	44.133	0	0	0	11.8	9.6	7	9.6	13.4	11.4	640670000	0	0	0	107000000	87323000	83767000	150450000
Q12931;I3L0K7;I3L239;I3L2D5	Q12931;I3L0K7	Heat shock protein 75 kDa, mitochondrial	TRAP1	sp|Q12931|TRAP1_HUMAN Heat shock protein 75 kDa, mitochondrial OS=Homo sapiens OX=9606 GN=TRAP1 PE=1 SV=3;tr|I3L0K7|I3L0K7_HUMAN Heat shock protein 75 kDa, mitochondrial OS=Homo sapiens OX=9606 GN=TRAP1 PE=1 SV=1	4	14	14	1	3	0	8	9	3	5	5	7	1	3	0	8	9	3	5	5	7	30.1	30.1	80.109	704	704;495;215;108	0	44.128	1.6	6.1	0	15.8	19.7	6.1	11.5	12.2	15.8	1082600000	3443100	7846800	0	239690000	228560000	68332000	164850000
C9JZR2;O60716;E9PRE2;E9PKY0;H0YC95;E9PKL1	C9JZR2;O60716	Catenin delta-1	CTNND1	tr|C9JZR2|C9JZR2_HUMAN Catenin delta-1 OS=Homo sapiens OX=9606 GN=CTNND1 PE=1 SV=2;sp|O60716|CTND1_HUMAN Catenin delta-1 OS=Homo sapiens OX=9606 GN=CTNND1 PE=1 SV=1	6	13	13	0	1	0	7	7	6	7	5	7	0	1	0	7	7	6	7	5	7	20	20	104.85	938	938;968;261;126;123;128	0	44.057	0	1.3	0	11.3	10.8	9	9.5	7.4	12.4	1025200000	0	1152600	0	167310000	153280000	113980000	208010000
P62136;E9PMD7;F8W0W8;H0Y3Y6;F5H1L6;F5H037;F8WE71;F8W1A0	P62136;E9PMD7;F8W0W8	Serine/threonine-protein phosphatase PP1-alpha catalytic subunit;Serine/threonine-protein phosphatase	PPP1CA;PPP1CC	sp|P62136|PP1A_HUMAN Serine/threonine-protein phosphatase PP1-alpha catalytic subunit OS=Homo sapiens OX=9606 GN=PPP1CA PE=1 SV=1;tr|E9PMD7|E9PMD7_HUMAN Serine/threonine-protein phosphatase (Fragment) OS=Homo sapiens OX=9606 GN=PPP1CA PE=1 SV=1;tr|F8W0W8|F	8	13	4	3	1	1	9	8	7	8	8	9	1	1	1	2	1	1	1	1	2	52.4	17.6	37.512	330	330;253;332;82;169;179;64;83	0	44.009	13	3.3	3.3	33	33	30.3	30.9	33	40.9	3076400000	11811000	3356700	1118000	530590000	461730000	399340000	468770000
P49321;Q5T624;H0YDS9;E9PPR5;E9PI86;E9PPQ8	P49321;Q5T624	Nuclear autoantigenic sperm protein	NASP	sp|P49321|NASP_HUMAN Nuclear autoantigenic sperm protein OS=Homo sapiens OX=9606 GN=NASP PE=1 SV=2;tr|Q5T624|Q5T624_HUMAN Nuclear autoantigenic sperm protein OS=Homo sapiens OX=9606 GN=NASP PE=1 SV=1	6	16	10	1	1	0	10	5	7	5	8	8	0	0	0	6	1	3	3	5	5	34.3	24.1	85.237	788	788;422;175;316;256;154	0	43.995	1	1	0	19.8	8.1	14.1	12.6	16.6	21.4	1932900000	4606400	3654300	0	275310000	256010000	314350000	229010000
G5E9Z2;Q96KA5	G5E9Z2;Q96KA5	Cleft lip and palate transmembrane protein 1-like protein	CLPTM1L	tr|G5E9Z2|G5E9Z2_HUMAN Cisplatin resistance related protein CRR9p, isoform CRA_c OS=Homo sapiens OX=9606 GN=CLPTM1L PE=1 SV=1;sp|Q96KA5|CLP1L_HUMAN Cleft lip and palate transmembrane protein 1-like protein OS=Homo sapiens OX=9606 GN=CLPTM1L PE=1 SV=1	2	6	6	0	0	0	2	3	3	2	4	4	0	0	0	2	3	3	2	4	4	25.7	25.7	43.28	369	369;538	0	43.988	0	0	0	6.5	14.1	14.9	9.8	17.9	19.2	687600000	0	0	0	61131000	81290000	49302000	105010000
P07384;E9PRM1;E9PLX0;E9PJJ3;E9PLC9;E9PMC6;E9PJA6;E9PSA6;E9PQB3;E9PL37;E9PIA9	P07384	Calpain-1 catalytic subunit	CAPN1	sp|P07384|CAN1_HUMAN Calpain-1 catalytic subunit OS=Homo sapiens OX=9606 GN=CAPN1 PE=1 SV=1	11	15	15	0	2	1	9	9	3	13	7	10	0	2	1	9	9	3	13	7	10	31.1	31.1	81.889	714	714;201;122;135;148;152;161;163;191;191;63	0	43.871	0	5.7	1.4	22.5	20.7	5.9	26.5	13.9	18.6	2627500000	0	11971000	11314000	388540000	452370000	109590000	715990000
Q13315;E9PIN0;E9PIQ5;E9PRG7;Q6P7P1;M0QXY8;A0A087X0E9	Q13315	Serine-protein kinase ATM	ATM	sp|Q13315|ATM_HUMAN Serine-protein kinase ATM OS=Homo sapiens OX=9606 GN=ATM PE=1 SV=4	7	19	19	0	0	0	11	3	4	7	11	6	0	0	0	11	3	4	7	11	6	8.2	8.2	350.68	3056	3056;1369;154;93;112;135;168	0	43.714	0	0	0	4.6	1.3	1.8	3.1	4.8	2.5	532580000	0	0	0	100250000	18577000	15363000	147620000
Q9UMX0;H0YEZ9	Q9UMX0	Ubiquilin-1	UBQLN1	sp|Q9UMX0|UBQL1_HUMAN Ubiquilin-1 OS=Homo sapiens OX=9606 GN=UBQLN1 PE=1 SV=2	2	9	4	0	0	0	8	6	6	7	8	8	0	0	0	3	2	2	2	3	4	28.2	14.9	62.518	589	589;158	0	43.667	0	0	0	24.3	16	19	21.6	24.3	25.6	1170700000	0	0	0	131310000	72869000	102370000	279320000
Q15785	Q15785	Mitochondrial import receptor subunit TOM34	TOMM34	sp|Q15785|TOM34_HUMAN Mitochondrial import receptor subunit TOM34 OS=Homo sapiens OX=9606 GN=TOMM34 PE=1 SV=2	1	3	3	0	0	0	2	2	1	2	2	1	0	0	0	2	2	1	2	2	1	17.2	17.2	34.559	309	309	0	43.361	0	0	0	11.3	11.3	4.9	11.3	10.7	4.9	150350000	0	0	0	42335000	28633000	8209400	20327000
P78344;D3DQV9;H0Y3P2;H0YCH5;E9PKF8;H0YEC5;H0YD77;H0YE22;H0YE44	P78344;D3DQV9;H0Y3P2	Eukaryotic translation initiation factor 4 gamma 2	EIF4G2	sp|P78344|IF4G2_HUMAN Eukaryotic translation initiation factor 4 gamma 2 OS=Homo sapiens OX=9606 GN=EIF4G2 PE=1 SV=1;tr|D3DQV9|D3DQV9_HUMAN Eukaryotic translation initiation factor 4 gamma 2 (Fragment) OS=Homo sapiens OX=9606 GN=EIF4G2 PE=1 SV=1;tr|H0Y3P2|	9	18	18	0	1	0	11	11	8	10	14	8	0	1	0	11	11	8	10	14	8	26.6	26.6	102.36	907	907;907;869;444;185;244;282;234;88	0	43.319	0	1.1	0	14.7	16	10.9	14.8	21.4	12.6	1734100000	0	3571200	0	230700000	294940000	133710000	367500000
Q14123;A0A0A0MS69;B4DK72;P54750;Q01064;F8W905	Q14123;A0A0A0MS69	Calcium/calmodulin-dependent 3,5-cyclic nucleotide phosphodiesterase 1C	PDE1C	sp|Q14123|PDE1C_HUMAN Calcium/calmodulin-dependent 3,5-cyclic nucleotide phosphodiesterase 1C OS=Homo sapiens OX=9606 GN=PDE1C PE=1 SV=1;tr|A0A0A0MS69|A0A0A0MS69_HUMAN Phosphodiesterase OS=Homo sapiens OX=9606 GN=PDE1C PE=1 SV=1	6	9	9	0	0	0	5	3	4	6	6	6	0	0	0	5	3	4	6	6	6	18.1	18.1	80.759	709	709;769;495;535;536;46	0	43.255	0	0	0	10.4	5.9	7.9	12.8	12.4	11.7	753980000	0	0	0	56821000	50185000	80786000	250560000
Q86XL3;F5H6J0;F5H1D4	Q86XL3	Ankyrin repeat and LEM domain-containing protein 2	ANKLE2	sp|Q86XL3|ANKL2_HUMAN Ankyrin repeat and LEM domain-containing protein 2 OS=Homo sapiens OX=9606 GN=ANKLE2 PE=1 SV=4	3	17	17	0	0	0	12	10	7	10	11	6	0	0	0	12	10	7	10	11	6	29.1	29.1	104.11	938	938;118;258	0	43.229	0	0	0	20.8	17.3	13.2	18.4	21.9	11.6	1050900000	0	0	0	99959000	127750000	95444000	213350000
Q9NYU2;H7BZG0	Q9NYU2	UDP-glucose:glycoprotein glucosyltransferase 1	UGGT1	sp|Q9NYU2|UGGG1_HUMAN UDP-glucose:glycoprotein glucosyltransferase 1 OS=Homo sapiens OX=9606 GN=UGGT1 PE=1 SV=3	2	15	14	0	0	0	8	8	4	9	11	9	0	0	0	8	8	4	8	11	9	15.7	15.2	177.19	1555	1555;131	0	43.179	0	0	0	7.8	7.9	3.5	8.9	12.2	9.5	1105600000	0	0	0	165000000	156060000	68041000	283090000
Q16643;D6R9W4;D6RFI1;D6R9Q9;D6RCR4	Q16643;D6R9W4	Drebrin	DBN1	sp|Q16643|DREB_HUMAN Drebrin OS=Homo sapiens OX=9606 GN=DBN1 PE=1 SV=4;tr|D6R9W4|D6R9W4_HUMAN Drebrin (Fragment) OS=Homo sapiens OX=9606 GN=DBN1 PE=1 SV=1	5	8	8	3	3	2	6	3	5	4	6	4	3	3	2	6	3	5	4	6	4	20.8	20.8	71.428	649	649;317;124;391;93	0	43.088	8.3	6.9	5.5	17.1	8.3	13.7	11.4	17.1	12.6	981460000	13222000	19928000	12461000	158010000	104960000	117610000	154070000
Q13505	Q13505	Metaxin-1	MTX1	sp|Q13505|MTX1_HUMAN Metaxin-1 OS=Homo sapiens OX=9606 GN=MTX1 PE=1 SV=3	1	9	9	0	0	0	6	5	5	4	7	6	0	0	0	6	5	5	4	7	6	22.1	22.1	51.462	466	466	0	43.078	0	0	0	18.9	14.2	9.2	11.6	18.9	16.3	2445300000	0	0	0	433510000	304370000	156200000	421370000
F8W9J4;Q03001;E9PHM6;F6QMI7;A0A494C1D7;E7ETB9;Q5T0V7;Q6P0N6;H0YC82;A0A0U1RQJ2	F8W9J4;Q03001;E9PHM6;F6QMI7;A0A494C1D7	Dystonin	DST	tr|F8W9J4|F8W9J4_HUMAN Dystonin OS=Homo sapiens OX=9606 GN=DST PE=1 SV=1;sp|Q03001|DYST_HUMAN Dystonin OS=Homo sapiens OX=9606 GN=DST PE=1 SV=4;tr|E9PHM6|E9PHM6_HUMAN Dystonin OS=Homo sapiens OX=9606 GN=DST PE=1 SV=3;tr|F6QMI7|F6QMI7_HUMAN Dystonin OS=Homo	10	21	21	0	0	0	9	9	7	10	12	6	0	0	0	9	9	7	10	12	6	4.2	4.2	847.96	7461	7461;7570;5497;5537;2383;1479;689;1143;448;2676	0	43.072	0	0	0	2	1.7	1.2	1.8	2.3	1	1068100000	0	0	0	117130000	113230000	129810000	247900000
Q8NBX0	Q8NBX0	Saccharopine dehydrogenase-like oxidoreductase	SCCPDH	sp|Q8NBX0|SCPDL_HUMAN Saccharopine dehydrogenase-like oxidoreductase OS=Homo sapiens OX=9606 GN=SCCPDH PE=1 SV=1	1	10	10	0	0	0	4	4	2	7	8	8	0	0	0	4	4	2	7	8	8	37.1	37.1	47.151	429	429	0	42.996	0	0	0	12.8	12.4	6.1	19.1	27.5	33.8	2561300000	0	0	0	202280000	247820000	110640000	897610000
A0A1X7SBZ2;A0A5H1ZRQ2;A0A1W2PQ51;Q92841;A0A0U1RQJ0	A0A1X7SBZ2;A0A5H1ZRQ2;A0A1W2PQ51;Q92841	Probable ATP-dependent RNA helicase DDX17	DDX17	tr|A0A1X7SBZ2|A0A1X7SBZ2_HUMAN Probable ATP-dependent RNA helicase DDX17 OS=Homo sapiens OX=9606 GN=DDX17 PE=1 SV=1;tr|A0A5H1ZRQ2|A0A5H1ZRQ2_HUMAN Probable ATP-dependent RNA helicase DDX17 OS=Homo sapiens OX=9606 GN=DDX17 PE=1 SV=1;tr|A0A1W2PQ51|A0A1W2PQ51	5	19	15	4	1	1	12	12	9	12	11	11	3	0	1	8	9	6	9	7	9	33.7	27.3	80.253	729	729;731;731;729;56	0	42.959	9.5	1.5	1.2	18.9	21.1	16.3	23.3	21.1	18.8	4486400000	36482000	4139300	3039600	703120000	853000000	491410000	1020700000
O14818;H0Y586;Q8TAA3;A0A087WYS6;F5GY34	O14818;H0Y586;Q8TAA3	Proteasome subunit alpha type-7;Proteasome subunit alpha type-7-like	PSMA7;PSMA8	sp|O14818|PSA7_HUMAN Proteasome subunit alpha type-7 OS=Homo sapiens OX=9606 GN=PSMA7 PE=1 SV=1;tr|H0Y586|H0Y586_HUMAN Proteasome endopeptidase complex (Fragment) OS=Homo sapiens OX=9606 GN=PSMA7 PE=1 SV=1;sp|Q8TAA3|PSMA8_HUMAN Proteasome subunit alpha-typ	5	10	10	4	3	3	6	5	4	7	8	7	4	3	3	6	5	4	7	8	7	51.6	51.6	27.887	248	248;187;256;224;63	0	42.946	21.8	17.3	17.3	36.7	22.6	25	36.7	46	31.9	2723500000	26156000	20965000	21008000	378710000	338100000	280070000	682800000
Q5JTH9;A0A087X1U8	Q5JTH9	RRP12-like protein	RRP12	sp|Q5JTH9|RRP12_HUMAN RRP12-like protein OS=Homo sapiens OX=9606 GN=RRP12 PE=1 SV=2	2	13	13	0	0	0	6	4	3	5	9	6	0	0	0	6	4	3	5	9	6	14.3	14.3	143.7	1297	1297;176	0	42.891	0	0	0	7.1	3.8	2.9	5.1	8.2	7.5	1121500000	0	0	0	161980000	114200000	26639000	285480000
O00425;F8WD15	O00425	Insulin-like growth factor 2 mRNA-binding protein 3	IGF2BP3	sp|O00425|IF2B3_HUMAN Insulin-like growth factor 2 mRNA-binding protein 3 OS=Homo sapiens OX=9606 GN=IGF2BP3 PE=1 SV=2	2	19	16	5	3	2	14	10	7	12	13	10	3	1	0	11	9	6	11	10	9	41.8	36.1	63.704	579	579;81	0	42.868	11.9	6.9	4	31.8	24.9	18.1	28.8	30.1	26.8	3674800000	22672000	8633400	9011000	651170000	522490000	253380000	720150000
O43390;B4DT28;A0A286YEZ8	O43390;B4DT28	Heterogeneous nuclear ribonucleoprotein R	HNRNPR	sp|O43390|HNRPR_HUMAN Heterogeneous nuclear ribonucleoprotein R OS=Homo sapiens OX=9606 GN=HNRNPR PE=1 SV=1;tr|B4DT28|B4DT28_HUMAN Heterogeneous nuclear ribonucleoprotein R OS=Homo sapiens OX=9606 GN=HNRNPR PE=1 SV=1	3	19	15	2	0	0	10	12	13	13	12	10	1	0	0	8	10	11	11	10	8	36	29.9	70.942	633	633;494;141	0	42.8	3.3	0	0	21.8	28.1	23.7	28.1	27	21.2	3591600000	6859400	0	0	468990000	562480000	434110000	747760000
Q96JB2;A0A087WTH9	Q96JB2	Conserved oligomeric Golgi complex subunit 3	COG3	sp|Q96JB2|COG3_HUMAN Conserved oligomeric Golgi complex subunit 3 OS=Homo sapiens OX=9606 GN=COG3 PE=1 SV=3	2	20	20	0	0	0	9	10	5	14	12	7	0	0	0	9	10	5	14	12	7	33.8	33.8	94.095	828	828;68	0	42.741	0	0	0	13.5	17.1	8.2	22.1	19.4	13.5	1494100000	0	0	0	216490000	212830000	78633000	511090000
Q8NHV4	Q8NHV4	Protein NEDD1	NEDD1	sp|Q8NHV4|NEDD1_HUMAN Protein NEDD1 OS=Homo sapiens OX=9606 GN=NEDD1 PE=1 SV=1	1	4	4	0	0	0	4	3	1	4	3	2	0	0	0	4	3	1	4	3	2	12.3	12.3	71.965	660	660	0	42.707	0	0	0	12.3	9.5	3.2	12.3	9.5	5.6	209920000	0	0	0	41302000	32756000	4800500	54791000
P14550;Q5T621;V9GYG2;V9GYP9	P14550	Alcohol dehydrogenase [NADP(+)]	AKR1A1	sp|P14550|AK1A1_HUMAN Aldo-keto reductase family 1 member A1 OS=Homo sapiens OX=9606 GN=AKR1A1 PE=1 SV=3	4	12	12	1	1	1	8	7	7	7	6	5	1	1	1	8	7	7	7	6	5	49.2	49.2	36.573	325	325;147;119;140	0	42.662	3.7	4.6	4.3	35.4	32	27.7	32	25.2	24	1631500000	0	6283300	0	263320000	249110000	200760000	353430000
G3V5Z7;P60900;G3V295;G3V3I1;G3V3U4;H0YJC4;G3V4S5;G3V2S7	G3V5Z7;P60900;G3V295;G3V3I1	Proteasome subunit alpha type;Proteasome subunit alpha type-6	PSMA6	tr|G3V5Z7|G3V5Z7_HUMAN Proteasome subunit alpha type OS=Homo sapiens OX=9606 GN=PSMA6 PE=1 SV=1;sp|P60900|PSA6_HUMAN Proteasome subunit alpha type-6 OS=Homo sapiens OX=9606 GN=PSMA6 PE=1 SV=1;tr|G3V295|G3V295_HUMAN Proteasome subunit alpha type OS=Homo sap	8	9	9	2	2	4	7	7	5	7	8	8	2	2	4	7	7	5	7	8	8	46.4	46.4	28.147	252	252;246;203;148;107;85;41;67	0	42.563	11.9	11.9	20.6	36.1	36.9	26.6	35.7	42.9	40.5	3371600000	31124000	17277000	40302000	616300000	391170000	426040000	708690000
P60953;Q5JYX0;A0A590UJK8;A0A494C1M1;A0A494BZX6;A0A3B3IRV0	P60953;Q5JYX0;A0A590UJK8;A0A494C1M1;A0A494BZX6	Cell division control protein 42 homolog	CDC42	sp|P60953|CDC42_HUMAN Cell division control protein 42 homolog OS=Homo sapiens OX=9606 GN=CDC42 PE=1 SV=2;tr|Q5JYX0|Q5JYX0_HUMAN Cell division control protein 42 homolog (Fragment) OS=Homo sapiens OX=9606 GN=CDC42 PE=1 SV=1;tr|A0A590UJK8|A0A590UJK8_HUMAN C	6	7	6	3	4	4	5	4	4	4	4	5	2	3	4	5	4	4	4	4	5	48.2	42.4	21.258	191	191;136;166;115;156;41	0	42.434	22.5	27.7	22	27.7	22.5	22.5	22.5	22.5	37.2	4295100000	8906400	17775000	54575000	540660000	612750000	660950000	661300000
Q6NUK1;A0A3B3IU96	Q6NUK1	Calcium-binding mitochondrial carrier protein SCaMC-1	SLC25A24	sp|Q6NUK1|SCMC1_HUMAN Calcium-binding mitochondrial carrier protein SCaMC-1 OS=Homo sapiens OX=9606 GN=SLC25A24 PE=1 SV=2	2	10	10	0	0	0	6	5	4	7	5	9	0	0	0	6	5	4	7	5	9	30	30	53.354	477	477;270	0	42.344	0	0	0	19.3	16.4	14.7	23.9	19.5	28.1	2098700000	0	0	0	271020000	251920000	181870000	527740000
Q14738;E9PFR3;H0Y8C4;H7C5Q9	Q14738;E9PFR3;H0Y8C4	Serine/threonine-protein phosphatase 2A 56 kDa regulatory subunit delta isoform	PPP2R5D	sp|Q14738|2A5D_HUMAN Serine/threonine-protein phosphatase 2A 56 kDa regulatory subunit delta isoform OS=Homo sapiens OX=9606 GN=PPP2R5D PE=1 SV=1;tr|E9PFR3|E9PFR3_HUMAN Serine/threonine-protein phosphatase 2A 56 kDa regulatory subunit OS=Homo sapiens OX=96	4	15	11	0	0	0	7	7	8	8	9	8	0	0	0	5	5	5	6	7	5	33.1	23.9	69.991	602	602;594;504;154	0	42.266	0	0	0	15.1	16.6	17.9	18.3	18.4	17.9	2743800000	0	0	0	268110000	268020000	321960000	628940000
P18124;A8MUD9;C9JIJ5;C9JZ88;Q9Y4A5	P18124;A8MUD9	60S ribosomal protein L7	RPL7	sp|P18124|RL7_HUMAN 60S ribosomal protein L7 OS=Homo sapiens OX=9606 GN=RPL7 PE=1 SV=1;tr|A8MUD9|A8MUD9_HUMAN 60S ribosomal protein L7 OS=Homo sapiens OX=9606 GN=RPL7 PE=1 SV=1	5	17	16	4	7	6	13	10	10	8	13	10	4	7	6	12	10	10	8	12	10	59.7	57.3	29.225	248	248;208;99;88;3859	0	42.05	19	33.1	29	42.3	32.7	36.3	29	39.5	40.3	18744000000	244890000	505810000	497730000	2576500000	2406700000	2249300000	3050400000
A0A087WYR3;O43399;A0A087WZ51	A0A087WYR3;O43399;A0A087WZ51	Tumor protein D54	TPD52L2	tr|A0A087WYR3|A0A087WYR3_HUMAN Tumor protein D54 OS=Homo sapiens OX=9606 GN=TPD52L2 PE=1 SV=1;sp|O43399|TPD54_HUMAN Tumor protein D54 OS=Homo sapiens OX=9606 GN=TPD52L2 PE=1 SV=2;tr|A0A087WZ51|A0A087WZ51_HUMAN Tumor protein D54 OS=Homo sapiens OX=9606 GN=T	3	6	6	0	0	0	4	5	4	3	5	5	0	0	0	4	5	4	3	5	5	41.4	41.4	23.764	222	222;206;152	0	42.05	0	0	0	23.4	35.1	23.4	17.6	32	32	1080200000	0	0	0	179910000	153460000	119950000	137240000
P55735;A8MXL6;E7ERC8	P55735;A8MXL6	Protein SEC13 homolog	SEC13	sp|P55735|SEC13_HUMAN Protein SEC13 homolog OS=Homo sapiens OX=9606 GN=SEC13 PE=1 SV=3;tr|A8MXL6|A8MXL6_HUMAN Protein SEC13 homolog OS=Homo sapiens OX=9606 GN=SEC13 PE=1 SV=1	3	7	7	2	2	2	5	5	5	4	5	5	2	2	2	5	5	5	4	5	5	36.6	36.6	35.54	322	322;284;86	0	42.028	11.8	10.6	11.8	28.6	28	28	23.3	28.6	29.8	3151500000	16959000	12459000	36045000	577150000	461990000	404180000	482290000
J3KN75;Q0IIM8;H0Y552;D6RFZ2;D6RC82	J3KN75;Q0IIM8	TBC1 domain family member 8B	TBC1D8B	tr|J3KN75|J3KN75_HUMAN TBC1 domain family member 8B OS=Homo sapiens OX=9606 GN=TBC1D8B PE=1 SV=1;sp|Q0IIM8|TBC8B_HUMAN TBC1 domain family member 8B OS=Homo sapiens OX=9606 GN=TBC1D8B PE=1 SV=2	5	11	11	0	0	0	10	8	3	8	8	4	0	0	0	10	8	3	8	8	4	12.1	12.1	128.11	1114	1114;1120;218;419;22	0	42.004	0	0	0	11.1	9.8	3.8	9.2	9.6	5	989720000	0	0	0	249220000	100800000	13853000	280940000
J3QSV6;O76021;I3L3C4;I3L3U9;I3L234;I3L1A3;J3KPU7;I3L2F2;I3L4T8;I3L1Y4	J3QSV6;O76021;I3L3C4;I3L3U9	Ribosomal L1 domain-containing protein 1	RSL1D1	tr|J3QSV6|J3QSV6_HUMAN Ribosomal L1 domain-containing protein 1 (Fragment) OS=Homo sapiens OX=9606 GN=RSL1D1 PE=1 SV=1;sp|O76021|RL1D1_HUMAN Ribosomal L1 domain-containing protein 1 OS=Homo sapiens OX=9606 GN=RSL1D1 PE=1 SV=3;tr|I3L3C4|I3L3C4_HUMAN Ribosom	10	12	12	0	0	0	5	3	1	5	5	6	0	0	0	5	3	1	5	5	6	35.1	35.1	48.208	430	430;490;158;296;98;93;39;43;46;47	0	41.968	0	0	0	17.9	11.4	3.5	19.8	19.1	20	628470000	0	0	0	36895000	27058000	40825000	153400000
P08621;M0QYR1;M0QX04	P08621	U1 small nuclear ribonucleoprotein 70 kDa	SNRNP70	sp|P08621|RU17_HUMAN U1 small nuclear ribonucleoprotein 70 kDa OS=Homo sapiens OX=9606 GN=SNRNP70 PE=1 SV=2	3	14	14	5	7	3	10	8	8	3	4	7	5	7	3	10	8	8	3	4	7	36.4	36.4	51.556	437	437;94;33	0	41.961	14.6	16.7	10.1	26.1	24	18.8	8.9	13	18.5	3441000000	285270000	131860000	181110000	992290000	551700000	412190000	277540000
Q99497;K7ELW0;K7EN27	Q99497;K7ELW0;K7EN27	Protein deglycase DJ-1	PARK7	sp|Q99497|PARK7_HUMAN Protein/nucleic acid deglycase DJ-1 OS=Homo sapiens OX=9606 GN=PARK7 PE=1 SV=2;tr|K7ELW0|K7ELW0_HUMAN Protein/nucleic acid deglycase DJ-1 OS=Homo sapiens OX=9606 GN=PARK7 PE=1 SV=1;tr|K7EN27|K7EN27_HUMAN Protein/nucleic acid deglycase	3	6	6	2	4	3	4	5	5	4	4	4	2	4	3	4	5	5	4	4	4	43.9	43.9	19.891	189	189;169;160	0	41.933	21.7	38.1	24.3	38.1	42.3	43.9	38.1	38.1	38.1	2914100000	98440000	46924000	32296000	475980000	462650000	395360000	475700000
Q9UBI6	Q9UBI6	Guanine nucleotide-binding protein G(I)/G(S)/G(O) subunit gamma-12	GNG12	sp|Q9UBI6|GBG12_HUMAN Guanine nucleotide-binding protein G(I)/G(S)/G(O) subunit gamma-12 OS=Homo sapiens OX=9606 GN=GNG12 PE=1 SV=3	1	3	3	0	0	0	2	3	2	2	2	2	0	0	0	2	3	2	2	2	2	44.4	44.4	8.0061	72	72	0	41.894	0	0	0	41.7	44.4	41.7	41.7	41.7	41.7	1162400000	0	0	0	194940000	184410000	151520000	251890000
H0YM70;A0A087X1Z3;Q9UL46;H0YKU2	H0YM70;A0A087X1Z3;Q9UL46	Proteasome activator complex subunit 2	PSME2	tr|H0YM70|H0YM70_HUMAN Proteasome activator complex subunit 2 OS=Homo sapiens OX=9606 GN=PSME2 PE=1 SV=1;tr|A0A087X1Z3|A0A087X1Z3_HUMAN Proteasome activator complex subunit 2 OS=Homo sapiens OX=9606 GN=PSME2 PE=1 SV=1;sp|Q9UL46|PSME2_HUMAN Proteasome activ	4	7	7	1	0	1	5	5	4	6	6	6	1	0	1	5	5	4	6	6	6	38.6	38.6	26.011	228	228;254;239;85	0	41.885	6.1	0	6.1	31.6	31.6	22.8	31.6	31.6	37.7	3199400000	3407700	0	3636400	306050000	412190000	269090000	890380000
P50995;H0Y6E1	P50995	Annexin A11	ANXA11	sp|P50995|ANX11_HUMAN Annexin A11 OS=Homo sapiens OX=9606 GN=ANXA11 PE=1 SV=1	2	10	10	1	1	2	6	8	6	8	9	9	1	1	2	6	8	6	8	9	9	28.3	28.3	54.389	505	505;148	0	41.775	2.4	2.4	4.2	14.9	22.8	17.4	23.6	25.7	25.3	2349700000	10350000	5436000	17959000	186790000	359150000	228430000	448970000
O96005;K7EJ16;K7EQQ1;K7ERL5	O96005	Cleft lip and palate transmembrane protein 1	CLPTM1	sp|O96005|CLPT1_HUMAN Cleft lip and palate transmembrane protein 1 OS=Homo sapiens OX=9606 GN=CLPTM1 PE=1 SV=1	4	10	10	1	1	1	6	7	4	6	9	3	1	1	1	6	7	4	6	9	3	26.8	26.8	76.096	669	669;152;171;209	0	41.739	2.2	2.2	2.2	14.9	20	10.3	20.9	23.5	10.5	1997900000	888140	625960	804470	241890000	243770000	178240000	485710000
A0A499FIX8;H7BXI1;A0A087WXU3;A0FGR8	A0A499FIX8;H7BXI1;A0A087WXU3;A0FGR8	Extended synaptotagmin-2	ESYT2	tr|A0A499FIX8|A0A499FIX8_HUMAN Extended synaptotagmin-2 OS=Homo sapiens OX=9606 GN=ESYT2 PE=1 SV=1;tr|H7BXI1|H7BXI1_HUMAN Extended synaptotagmin-2 OS=Homo sapiens OX=9606 GN=ESYT2 PE=1 SV=2;tr|A0A087WXU3|A0A087WXU3_HUMAN Extended synaptotagmin-2 OS=Homo sa	4	16	16	0	0	0	8	11	7	10	12	11	0	0	0	8	11	7	10	12	11	28.5	28.5	93.977	845	845;866;921;921	0	41.731	0	0	0	13.3	19.1	10.8	16.9	21.4	18.1	2173000000	0	0	0	388740000	337100000	92066000	428810000
F8VV56;F8W022;F8VWK8;P08962;F8VNT9	F8VV56;F8W022;F8VWK8;P08962;F8VNT9	Tetraspanin;CD63 antigen	CD63	tr|F8VV56|F8VV56_HUMAN CD63 antigen OS=Homo sapiens OX=9606 GN=CD63 PE=1 SV=1;tr|F8W022|F8W022_HUMAN Tetraspanin (Fragment) OS=Homo sapiens OX=9606 GN=CD63 PE=1 SV=1;tr|F8VWK8|F8VWK8_HUMAN Tetraspanin (Fragment) OS=Homo sapiens OX=9606 GN=CD63 PE=1 SV=1;sp	5	4	4	1	1	1	3	2	3	3	4	3	1	1	1	3	2	3	3	4	3	23.4	23.4	16.021	145	145;215;217;238;133	0	41.663	6.9	6.9	6.9	23.4	22.1	23.4	23.4	23.4	23.4	9010400000	5962100	23606000	0	1195500000	1191600000	920240000	1713600000
P51114;B4DXZ6;E9PFF5;E7EU85;C9JAJ4;C9JYQ6;C9IZ22;C9JZE0;C9JY20;R9WNI0;A8MQB8;G3V0J0;Q06787	P51114;B4DXZ6;E9PFF5;E7EU85	Fragile X mental retardation syndrome-related protein 1	FXR1	sp|P51114|FXR1_HUMAN Fragile X mental retardation syndrome-related protein 1 OS=Homo sapiens OX=9606 GN=FXR1 PE=1 SV=3;tr|B4DXZ6|B4DXZ6_HUMAN Fragile X mental retardation syndrome-related protein 1 OS=Homo sapiens OX=9606 GN=FXR1 PE=1 SV=1;tr|E9PFF5|E9PFF5	13	12	10	1	2	1	5	3	2	4	8	6	0	0	1	3	2	1	3	7	5	24.8	22.2	69.72	621	621;608;490;454;151;19;94;119;123;544;582;592;632	0	41.61	1.3	2.6	2.1	10.1	7.4	3.4	7.6	13.7	12.7	920720000	0	16240000	1497300	168230000	57319000	83796000	163040000
Q9H4A4;A6NKB8;A0A087WU27;A0A087WUS4;C9JMZ3;H7C2T3	Q9H4A4;A6NKB8;A0A087WU27	Aminopeptidase B	RNPEP	sp|Q9H4A4|AMPB_HUMAN Aminopeptidase B OS=Homo sapiens OX=9606 GN=RNPEP PE=1 SV=2;tr|A6NKB8|A6NKB8_HUMAN Aminopeptidase B OS=Homo sapiens OX=9606 GN=RNPEP PE=1 SV=1;tr|A0A087WU27|A0A087WU27_HUMAN Aminopeptidase B (Fragment) OS=Homo sapiens OX=9606 GN=RNPEP	6	15	15	0	0	0	10	7	9	9	9	11	0	0	0	10	7	9	9	9	11	36.5	36.5	72.595	650	650;611;171;151;344;168	0	41.464	0	0	0	21.2	15.4	23.4	22.2	19.7	28.9	1744700000	0	0	0	361940000	184610000	131300000	358350000
P55084;F5GZQ3;B5MD38;C9JEY0;C9JE81;C9K0M0	P55084;F5GZQ3;B5MD38	Trifunctional enzyme subunit beta, mitochondrial;3-ketoacyl-CoA thiolase	HADHB	sp|P55084|ECHB_HUMAN Trifunctional enzyme subunit beta, mitochondrial OS=Homo sapiens OX=9606 GN=HADHB PE=1 SV=3;tr|F5GZQ3|F5GZQ3_HUMAN Trifunctional enzyme subunit beta, mitochondrial OS=Homo sapiens OX=9606 GN=HADHB PE=1 SV=1;tr|B5MD38|B5MD38_HUMAN Trifu	6	18	18	3	3	2	10	9	3	5	11	7	3	3	2	10	9	3	5	11	7	50.4	50.4	51.294	474	474;459;351;149;175;84	0	41.205	6.5	7	3.8	32.5	23	6.5	11.2	27.8	26.6	1711900000	10498000	18352000	10652000	303430000	244660000	123900000	291990000
Q04917;A2IDB2;F8WEB6;A2IDB1	Q04917;A2IDB2	14-3-3 protein eta	YWHAH	sp|Q04917|1433F_HUMAN 14-3-3 protein eta OS=Homo sapiens OX=9606 GN=YWHAH PE=1 SV=4;tr|A2IDB2|A2IDB2_HUMAN 14-3-3 protein eta (Fragment) OS=Homo sapiens OX=9606 GN=YWHAH PE=1 SV=1	4	12	10	4	6	2	10	10	10	11	10	9	3	5	2	8	8	8	9	8	8	51.2	47.2	28.218	246	246;162;39;72	0	40.909	20.7	32.5	11.8	45.9	44.3	44.3	47.2	44.3	43.9	5251900000	49274000	47009000	36778000	822780000	718360000	967720000	851040000
Q6YHU6;H0Y3V5;B5MC89;H7BYZ4;B6ZDE5;F5H3M9	Q6YHU6;H0Y3V5	Thyroid adenoma-associated protein	THADA	sp|Q6YHU6|THADA_HUMAN Thyroid adenoma-associated protein OS=Homo sapiens OX=9606 GN=THADA PE=1 SV=1;tr|H0Y3V5|H0Y3V5_HUMAN Thyroid adenoma-associated protein (Fragment) OS=Homo sapiens OX=9606 GN=THADA PE=1 SV=1	6	15	15	0	0	0	8	10	6	9	8	9	0	0	0	8	10	6	9	8	9	11.9	11.9	219.6	1953	1953;1193;870;408;297;348	0	40.828	0	0	0	7.1	8.5	5.1	6.7	7.1	8.2	1787700000	0	0	0	219770000	262700000	139110000	446930000
Q96QU8;I3L2K0;H3BRV5;H3BR41;H3BMW9;H3BPG8	Q96QU8	Exportin-6	XPO6	sp|Q96QU8|XPO6_HUMAN Exportin-6 OS=Homo sapiens OX=9606 GN=XPO6 PE=1 SV=1	6	11	11	0	0	0	6	5	6	6	9	7	0	0	0	6	5	6	6	9	7	11.8	11.8	128.88	1125	1125;255;132;142;153;161	0	40.803	0	0	0	7.2	6.4	7.1	7.5	9.8	8.4	982700000	0	0	0	87085000	139580000	60092000	236910000
G3XAI2;P07942;E7EPA6	G3XAI2;P07942	Laminin subunit beta-1	LAMB1	tr|G3XAI2|G3XAI2_HUMAN Laminin subunit beta-1 OS=Homo sapiens OX=9606 GN=LAMB1 PE=1 SV=1;sp|P07942|LAMB1_HUMAN Laminin subunit beta-1 OS=Homo sapiens OX=9606 GN=LAMB1 PE=1 SV=2	3	7	7	0	1	0	5	3	3	4	4	3	0	1	0	5	3	3	4	4	3	5.3	5.3	200.48	1810	1810;1786;850	0	40.777	0	0.8	0	3.6	2.3	2.6	3.1	3.1	2.9	515830000	0	1732700	0	120100000	80826000	32174000	74736000
Q02809;Q5JXB7;Q5JXB8	Q02809	Procollagen-lysine,2-oxoglutarate 5-dioxygenase 1	PLOD1	sp|Q02809|PLOD1_HUMAN Procollagen-lysine,2-oxoglutarate 5-dioxygenase 1 OS=Homo sapiens OX=9606 GN=PLOD1 PE=1 SV=2	3	15	15	1	2	1	7	8	5	7	10	4	1	2	1	7	8	5	7	10	4	27.8	27.8	83.549	727	727;283;225	0	40.729	1.7	3	1.7	13.5	15.1	8.8	14.2	18.2	8.5	1646500000	4808300	7176300	2260300	203820000	307830000	129830000	342890000
E9PIR7;F8W809;A0A087WSW9;A0A182DWI3;A0A087WSY9;Q16881;E2QRB9;E9PKD3;E9PLT3;E9PKI4;A0A0B4J225;E9PIZ5;E9PQI3;E9PJU2;A0A096LPD9;E7EWK1;A0A096LPK7	E9PIR7;F8W809;A0A087WSW9;A0A182DWI3;A0A087WSY9;Q16881;E2QRB9;E9PKD3	Thioredoxin reductase 1, cytoplasmic	TXNRD1	tr|E9PIR7|E9PIR7_HUMAN Thioredoxin reductase 1, cytoplasmic OS=Homo sapiens OX=9606 GN=TXNRD1 PE=1 SV=1;tr|F8W809|F8W809_HUMAN Thioredoxin reductase 1, cytoplasmic OS=Homo sapiens OX=9606 GN=TXNRD1 PE=1 SV=1;tr|A0A087WSW9|A0A087WSW9_HUMAN Thioredoxin reduc	17	11	10	1	0	1	7	4	5	7	7	6	1	0	1	6	4	4	7	6	5	39.6	36.5	53.166	482	482;498;548;568;648;649;460;175;70;72;103;139;53;96;306;338;463	0	40.692	2.1	0	4.8	25.9	13.1	17.2	25.7	25.9	21.8	2341900000	0	0	13385000	526760000	199150000	266880000	439970000
P78417;Q5TA02;Q5TA01	P78417;Q5TA02;Q5TA01	Glutathione S-transferase omega-1	GSTO1	sp|P78417|GSTO1_HUMAN Glutathione S-transferase omega-1 OS=Homo sapiens OX=9606 GN=GSTO1 PE=1 SV=2;tr|Q5TA02|Q5TA02_HUMAN Glutathione S-transferase omega-1 (Fragment) OS=Homo sapiens OX=9606 GN=GSTO1 PE=1 SV=1;tr|Q5TA01|Q5TA01_HUMAN Glutathione S-transfera	3	12	12	2	2	1	8	8	6	7	7	8	2	2	1	8	8	6	7	7	8	56.4	56.4	27.566	241	241;200;180	0	40.576	7.9	7.9	3.7	43.6	32.4	21.2	32	28.6	40.2	4720700000	33807000	0	0	705900000	979460000	435770000	995300000
K7EKE6;K7EJE8;P36776;K7ER27;K7ER56;K7ERR6	K7EKE6;K7EJE8;P36776	Lon protease homolog, mitochondrial	LONP1	tr|K7EKE6|K7EKE6_HUMAN Lon protease homolog, mitochondrial OS=Homo sapiens OX=9606 GN=LONP1 PE=1 SV=1;tr|K7EJE8|K7EJE8_HUMAN Lon protease homolog, mitochondrial OS=Homo sapiens OX=9606 GN=LONP1 PE=1 SV=1;sp|P36776|LONM_HUMAN Lon protease homolog, mitochond	6	14	14	0	0	0	7	5	2	8	7	7	0	0	0	7	5	2	8	7	7	23.4	23.4	95.179	845	845;829;959;242;210;264	0	40.544	0	0	0	11.6	10.7	4.7	14.8	12.5	13	1065100000	0	0	0	185400000	114810000	84708000	305180000
Q96TA1	Q96TA1	Niban-like protein 1	FAM129B	sp|Q96TA1|NIBA2_HUMAN Protein Niban 2 OS=Homo sapiens OX=9606 GN=NIBAN2 PE=1 SV=3	1	12	12	1	2	0	9	9	8	9	8	9	1	2	0	9	9	8	9	8	9	30.2	30.2	84.137	746	746	0	40.389	1.7	6.3	0	19.7	23.3	18.4	19.7	19.3	21.4	2381200000	6404600	5666200	0	470820000	324150000	226660000	551530000
Q9NZJ4;B2REB0;H0Y6M8	Q9NZJ4;B2REB0;H0Y6M8	Sacsin	SACS	sp|Q9NZJ4|SACS_HUMAN Sacsin OS=Homo sapiens OX=9606 GN=SACS PE=1 SV=2;tr|B2REB0|B2REB0_HUMAN Sacsin OS=Homo sapiens OX=9606 GN=SACS PE=1 SV=2;tr|H0Y6M8|H0Y6M8_HUMAN Sacsin OS=Homo sapiens OX=9606 GN=SACS PE=1 SV=2	3	14	14	0	0	0	4	4	3	9	8	3	0	0	0	4	4	3	9	8	3	3.8	3.8	521.12	4579	4579;750;832	0	40.298	0	0	0	1.2	1.3	1	2.6	2.3	0.9	590610000	0	0	0	79758000	65426000	22192000	127120000
Q16401;F2Z3J2;Q4VXH0	Q16401	26S proteasome non-ATPase regulatory subunit 5	PSMD5	sp|Q16401|PSMD5_HUMAN 26S proteasome non-ATPase regulatory subunit 5 OS=Homo sapiens OX=9606 GN=PSMD5 PE=1 SV=3	3	12	12	1	0	0	9	8	7	10	10	8	1	0	0	9	8	7	10	10	8	30.2	30.2	56.195	504	504;72;113	0	40.286	1.8	0	0	24.6	19.8	19	25	26.2	21	1941200000	0	0	0	252760000	216630000	162980000	559840000
O94925;H7BZD1	O94925	Glutaminase kidney isoform, mitochondrial	GLS	sp|O94925|GLSK_HUMAN Glutaminase kidney isoform, mitochondrial OS=Homo sapiens OX=9606 GN=GLS PE=1 SV=1	2	13	12	0	1	0	8	7	7	9	7	7	0	1	0	8	7	7	9	7	6	29.3	26.2	73.46	669	669;114	0	40.276	0	2.1	0	16.4	17.5	16.1	19.6	14.5	20.2	1433000000	0	0	0	184440000	124260000	118140000	401520000
P40925;A0A5K1VW95;B9A041;B8ZZ51;C9JF79;C9JRL4;C9JLV6	P40925;A0A5K1VW95;B9A041;B8ZZ51;C9JF79	Malate dehydrogenase, cytoplasmic;Malate dehydrogenase	MDH1	sp|P40925|MDHC_HUMAN Malate dehydrogenase, cytoplasmic OS=Homo sapiens OX=9606 GN=MDH1 PE=1 SV=4;tr|A0A5K1VW95|A0A5K1VW95_HUMAN Malate dehydrogenase, cytoplasmic OS=Homo sapiens OX=9606 GN=MDH1 PE=4 SV=1;tr|B9A041|B9A041_HUMAN Malate dehydrogenase, cytopla	7	10	10	5	2	4	8	8	9	7	9	7	5	2	4	8	8	9	7	9	7	41.9	41.9	36.426	334	334;353;210;169;222;119;114	0	40.245	20.4	7.8	17.7	34.7	34.7	39.2	31.7	39.2	31.7	5134500000	70636000	25181000	65489000	753420000	703150000	892540000	799040000
F8W7C6;A0A087WV22;H7C123;H7C2C5;Q96L21;H7C2U2	F8W7C6;A0A087WV22;H7C123;H7C2C5		RPL10	tr|F8W7C6|F8W7C6_HUMAN 60S ribosomal protein L10 OS=Homo sapiens OX=9606 GN=RPL10 PE=1 SV=2;tr|A0A087WV22|A0A087WV22_HUMAN 60S ribosomal protein L10 OS=Homo sapiens OX=9606 GN=RPL10 PE=1 SV=1;tr|H7C123|H7C123_HUMAN 60S ribosomal protein L10 (Fragment) OS=H	6	11	1	7	7	4	8	6	4	4	6	6	1	1	0	1	1	0	1	1	0	52.1	11	18.565	163	163;178;91;131;214;28	0	40.232	39.3	38.7	22.7	52.1	41.7	22.7	26.4	41.7	33.1	59956000	0	3053600	0	12379000	16970000	0	0
Q9Y2A7	Q9Y2A7	Nck-associated protein 1	NCKAP1	sp|Q9Y2A7|NCKP1_HUMAN Nck-associated protein 1 OS=Homo sapiens OX=9606 GN=NCKAP1 PE=1 SV=1	1	14	14	0	1	0	6	4	4	8	10	10	0	1	0	6	4	4	8	10	10	18.5	18.5	128.79	1128	1128	0	40.214	0	1	0	8.7	5.6	5.3	12.1	14.3	13.6	843440000	0	2081800	0	108800000	30036000	58186000	167710000
R4GNH3;E9PM69;P17980;E9PN50;E9PMD8;E9PKD5;E9PLG2	R4GNH3;E9PM69;P17980;E9PN50;E9PMD8;E9PKD5	26S protease regulatory subunit 6A	PSMC3	tr|R4GNH3|R4GNH3_HUMAN 26S proteasome regulatory subunit 6A OS=Homo sapiens OX=9606 GN=PSMC3 PE=1 SV=1;tr|E9PM69|E9PM69_HUMAN 26S proteasome regulatory subunit 6A OS=Homo sapiens OX=9606 GN=PSMC3 PE=1 SV=1;sp|P17980|PRS6A_HUMAN 26S proteasome regulatory su	7	8	8	1	1	0	4	5	2	5	6	6	1	1	0	4	5	2	5	6	6	30.5	30.5	47.352	423	423;397;439;257;301;311;184	0	40.168	4.7	3.8	0	15.6	18.7	8.3	20.3	24.1	23.2	879420000	2190400	4128200	0	73331000	146040000	45790000	204550000
B4DDF4;B4DUT8;Q99439;A0A087X271;H3BVI6;K7ES69;A0A087X1X5;A0A087WV51;H3BQH0	B4DDF4;B4DUT8;Q99439;A0A087X271;H3BVI6;K7ES69	Calponin;Calponin-2	CNN2	tr|B4DDF4|B4DDF4_HUMAN Calponin OS=Homo sapiens OX=9606 GN=CNN2 PE=1 SV=1;tr|B4DUT8|B4DUT8_HUMAN Calponin OS=Homo sapiens OX=9606 GN=CNN2 PE=1 SV=1;sp|Q99439|CNN2_HUMAN Calponin-2 OS=Homo sapiens OX=9606 GN=CNN2 PE=1 SV=4;tr|A0A087X271|A0A087X271_HUMAN Cal	9	10	9	4	4	6	6	3	3	6	7	4	3	3	5	6	3	2	5	6	4	46.3	42.6	32.616	298	298;330;309;179;261;148;191;66;154	0	40.096	17.1	17.4	25.5	33.6	15.1	14.1	24.2	33.2	15.8	2934300000	40293000	40528000	72524000	343380000	204250000	256810000	909660000
Q13637;P57729;H0YEA4	Q13637	Ras-related protein Rab-32	RAB32	sp|Q13637|RAB32_HUMAN Ras-related protein Rab-32 OS=Homo sapiens OX=9606 GN=RAB32 PE=1 SV=3	3	14	13	0	0	0	6	7	6	6	11	9	0	0	0	5	6	5	5	10	8	68.4	63.6	24.997	225	225;211;89	0	40.08	0	0	0	35.6	38.7	33.8	35.6	52.4	51.6	2223000000	0	0	0	232390000	294020000	191930000	523240000
Q8NFQ8	Q8NFQ8	Torsin-1A-interacting protein 2	TOR1AIP2	sp|Q8NFQ8|TOIP2_HUMAN Torsin-1A-interacting protein 2 OS=Homo sapiens OX=9606 GN=TOR1AIP2 PE=1 SV=1	1	10	10	0	0	0	4	6	4	5	4	4	0	0	0	4	6	4	5	4	4	38.5	38.5	51.263	470	470	0	40.029	0	0	0	15.3	23	17.9	17.9	17.4	22.1	1152100000	0	0	0	206310000	246270000	95037000	216960000
Q9Y2Z0	Q9Y2Z0	Suppressor of G2 allele of SKP1 homolog	SUGT1	sp|Q9Y2Z0|SGT1_HUMAN Protein SGT1 homolog OS=Homo sapiens OX=9606 GN=SUGT1 PE=1 SV=3	1	10	10	1	1	2	8	5	5	4	8	6	1	1	2	8	5	5	4	8	6	35.6	35.6	41.024	365	365	0	39.888	3.3	3.3	6.3	29	17.3	17.3	14	29	22.2	1127800000	9555900	5983600	12112000	247620000	169910000	73691000	111390000
P23458;A0A5F9ZHN8;A0A5F9ZI39;A0A5F9ZH07;A0A5F9ZHW0;A0A5F9ZH32;A0A5F9ZI01;A0A5F9ZH73;A0A5F9ZHK2;A0A5F9ZHI1	P23458;A0A5F9ZHN8;A0A5F9ZI39;A0A5F9ZH07;A0A5F9ZHW0	Tyrosine-protein kinase JAK1	JAK1	sp|P23458|JAK1_HUMAN Tyrosine-protein kinase JAK1 OS=Homo sapiens OX=9606 GN=JAK1 PE=1 SV=2;tr|A0A5F9ZHN8|A0A5F9ZHN8_HUMAN Tyrosine-protein kinase OS=Homo sapiens OX=9606 GN=JAK1 PE=1 SV=1;tr|A0A5F9ZI39|A0A5F9ZI39_HUMAN Tyrosine-protein kinase OS=Homo sapi	10	10	10	0	0	0	5	5	3	5	5	4	0	0	0	5	5	3	5	5	4	11.7	11.7	133.28	1154	1154;1110;1152;993;468;708;345;87;129;131	0	39.836	0	0	0	5.9	6.1	3.8	6.2	6.2	5	502860000	0	0	0	58202000	58651000	27600000	148340000
O15144;C9JTV5;G5E9J0;H7C3F9;G5E9S7	O15144	Actin-related protein 2/3 complex subunit 2	ARPC2	sp|O15144|ARPC2_HUMAN Actin-related protein 2/3 complex subunit 2 OS=Homo sapiens OX=9606 GN=ARPC2 PE=1 SV=1	5	16	16	3	1	2	12	7	7	10	10	8	3	1	2	12	7	7	10	10	8	58.3	58.3	34.333	300	300;89;91;165;38	0	39.733	12	3	9	35	25.3	28	37.3	40	39.3	4256100000	37092000	10890000	7031900	973110000	489020000	482400000	946710000
P17813;F5GX88	P17813;F5GX88	Endoglin	ENG	sp|P17813|EGLN_HUMAN Endoglin OS=Homo sapiens OX=9606 GN=ENG PE=1 SV=2;tr|F5GX88|F5GX88_HUMAN Endoglin OS=Homo sapiens OX=9606 GN=ENG PE=1 SV=1	2	5	5	0	0	0	4	3	2	3	3	2	0	0	0	4	3	2	3	3	2	11.2	11.2	70.577	658	658;476	0	39.441	0	0	0	9.1	7.1	5.2	7.1	7.1	4.9	530060000	0	0	0	81231000	74360000	22179000	141340000
H3BQZ9;P07741;H3BSW3;H3BQF1;H3BQB1	H3BQZ9;P07741;H3BSW3;H3BQF1;H3BQB1	Adenine phosphoribosyltransferase	APRT	tr|H3BQZ9|H3BQZ9_HUMAN Adenine phosphoribosyltransferase OS=Homo sapiens OX=9606 GN=APRT PE=1 SV=1;sp|P07741|APT_HUMAN Adenine phosphoribosyltransferase OS=Homo sapiens OX=9606 GN=APRT PE=1 SV=2;tr|H3BSW3|H3BSW3_HUMAN Adenine phosphoribosyltransferase OS=H	5	7	7	0	0	0	6	6	2	6	6	4	0	0	0	6	6	2	6	6	4	66	66	16.616	153	153;180;63;148;162	0	39.293	0	0	0	60.8	54.2	13.7	58.8	58.8	29.4	1247500000	0	0	0	307970000	209520000	53999000	253310000
O60313;A0A2R8Y3X5;A0A2R8YE78;A0A2R8YDM2;C9JMB8;E5KLJ9;A0A2R8YGE5;A0A2R8YFD1;A0A2R8YD53;A0A2R8Y4Q3;A0A2R8Y4G4;A0A2R8YE54;C9JY58;A0A2R8Y5G3	O60313;A0A2R8Y3X5;A0A2R8YE78;A0A2R8YDM2;C9JMB8;E5KLJ9;A0A2R8YGE5;A0A2R8YFD1;A0A2R8YD53;A0A2R8Y4Q3;A0A2R8Y4G4	Dynamin-like 120 kDa protein, mitochondrial;Dynamin-like 120 kDa protein, form S1	OPA1	sp|O60313|OPA1_HUMAN Dynamin-like 120 kDa protein, mitochondrial OS=Homo sapiens OX=9606 GN=OPA1 PE=1 SV=3;tr|A0A2R8Y3X5|A0A2R8Y3X5_HUMAN Dynamin-like 120 kDa protein, mitochondrial OS=Homo sapiens OX=9606 GN=OPA1 PE=1 SV=1;tr|A0A2R8YE78|A0A2R8YE78_HUMAN D	14	16	16	0	0	0	11	5	8	9	11	7	0	0	0	11	5	8	9	11	7	24.3	24.3	111.63	960	960;854;963;965;972;979;664;623;569;412;377;528;84;209	0	39.246	0	0	0	16.7	8.2	12.3	14.3	16.6	11.7	1156000000	0	0	0	188420000	138080000	146130000	225310000
A0A087X2I1;P62333;H0YJC0;H0YJS8;H0YJX2;H0YJE9;H0YJT1	A0A087X2I1;P62333;H0YJC0	26S protease regulatory subunit 10B	PSMC6	tr|A0A087X2I1|A0A087X2I1_HUMAN 26S proteasome regulatory subunit 10B OS=Homo sapiens OX=9606 GN=PSMC6 PE=1 SV=1;sp|P62333|PRS10_HUMAN 26S proteasome regulatory subunit 10B OS=Homo sapiens OX=9606 GN=PSMC6 PE=1 SV=1;tr|H0YJC0|H0YJC0_HUMAN 26S proteasome reg	7	12	12	3	0	1	5	6	5	7	7	10	3	0	1	5	6	5	7	7	10	44.9	44.9	45.796	403	403;389;262;194;67;70;97	0	39.123	10.2	0	3	16.9	23.1	17.1	26.1	26.1	38	1813600000	10352000	0	2967400	177840000	254420000	169200000	391480000
P15121;E9PCX2;E9PEF9;C9JRZ8	P15121;E9PCX2	Aldose reductase	AKR1B1	sp|P15121|ALDR_HUMAN Aldo-keto reductase family 1 member B1 OS=Homo sapiens OX=9606 GN=AKR1B1 PE=1 SV=3;tr|E9PCX2|E9PCX2_HUMAN Aldo-keto reductase family 1 member B1 OS=Homo sapiens OX=9606 GN=AKR1B1 PE=1 SV=1	4	9	9	0	1	1	5	4	5	4	4	7	0	1	1	5	4	5	4	4	7	46.2	46.2	35.853	316	316;263;102;316	0	38.853	0	2.5	3.5	26.9	24.4	27.2	24.4	24.4	40.2	3342100000	0	0	12252000	431830000	435140000	451000000	680310000
P16234;A0A0B4J203	P16234;A0A0B4J203	Platelet-derived growth factor receptor alpha	PDGFRA;FIP1L1	sp|P16234|PGFRA_HUMAN Platelet-derived growth factor receptor alpha OS=Homo sapiens OX=9606 GN=PDGFRA PE=1 SV=1;tr|A0A0B4J203|A0A0B4J203_HUMAN Protein kinase domain-containing protein OS=Homo sapiens OX=9606 PE=3 SV=1	2	6	6	0	0	0	0	0	1	4	4	5	0	0	0	0	0	1	4	4	5	10.3	10.3	122.67	1089	1089;849	0	38.716	0	0	0	0	0	1.8	5.6	6.8	9.1	561230000	0	0	0	0	0	4584100	109820000
O75131;A0A087WYQ3;H0YB26;E5RHZ0;A0A087WXR6;A0A087WUS8;E5RFT7;E7ENV7;Q96FN4;Q8IYJ1;Q96A23;O95741;Q86YQ8;Q9HCH3;Q9UBL6	O75131;A0A087WYQ3;H0YB26	Copine-3	CPNE3	sp|O75131|CPNE3_HUMAN Copine-3 OS=Homo sapiens OX=9606 GN=CPNE3 PE=1 SV=1;tr|A0A087WYQ3|A0A087WYQ3_HUMAN Copine-3 (Fragment) OS=Homo sapiens OX=9606 GN=CPNE3 PE=1 SV=1;tr|H0YB26|H0YB26_HUMAN Copine-3 (Fragment) OS=Homo sapiens OX=9606 GN=CPNE3 PE=1 SV=1	15	13	13	4	1	1	10	9	7	9	10	9	4	1	1	10	9	7	9	10	9	35.2	35.2	60.13	537	537;234;262;153;139;135;79;552;548;553;557;557;564;593;633	0	38.602	10.8	2.2	1.7	25.1	22.2	17.3	26.3	25.1	24.4	2458900000	21350000	3843000	10858000	363990000	330240000	213020000	493150000
P54577;A0A0C4DGZ5	P54577;A0A0C4DGZ5	Tyrosine--tRNA ligase, cytoplasmic;Tyrosine--tRNA ligase, cytoplasmic, N-terminally processed;Tyrosine--tRNA ligase	YARS	sp|P54577|SYYC_HUMAN Tyrosine--tRNA ligase, cytoplasmic OS=Homo sapiens OX=9606 GN=YARS1 PE=1 SV=4;tr|A0A0C4DGZ5|A0A0C4DGZ5_HUMAN Tyrosine--tRNA ligase OS=Homo sapiens OX=9606 GN=YARS1 PE=1 SV=1	2	16	16	1	2	1	11	11	7	9	9	7	1	2	1	11	11	7	9	9	7	35.6	35.6	59.143	528	528;388	0	38.45	1.7	3.4	1.7	26.7	24.8	15.7	22.7	22.3	15.9	2742900000	0	14160000	0	426500000	409290000	287260000	618400000
G3V4W0;B4DY08;B2R5W2;G3V4C1;G3V5X6;G3V3K6;G3V251;B4DSU6;G3V2D6;A0A0G2JPF8;A0A0G2JNQ3;P0DMR1;O60812;B7ZW38;B2RXH8;G3V4M8;G3V5V7;G3V2H6	G3V4W0;B4DY08;B2R5W2;G3V4C1;G3V5X6;G3V3K6;G3V251;B4DSU6;G3V2D6;A0A0G2JPF8;A0A0G2JNQ3;P0DMR1;O60812;B7ZW38;B2RXH8	Heterogeneous nuclear ribonucleoprotein C-like 4;Heterogeneous nuclear ribonucleoprotein C-like 1;Heterogeneous nuclear ribonucleoprotein C-like 3;Heterogeneous nuclear ribonucleoprotein C-like 2	HNRNPC;HNRNPCL4;HNRNPCL1;HNRNPCL3;HNRNPCL2	tr|G3V4W0|G3V4W0_HUMAN Heterogeneous nuclear ribonucleoproteins C1/C2 (Fragment) OS=Homo sapiens OX=9606 GN=HNRNPC PE=1 SV=1;tr|B4DY08|B4DY08_HUMAN Heterogeneous nuclear ribonucleoproteins C1/C2 OS=Homo sapiens OX=9606 GN=HNRNPC PE=1 SV=1;tr|B2R5W2|B2R5W2_	18	10	1	3	4	2	6	6	7	5	6	7	0	0	0	1	1	1	1	1	1	37.8	6.9	28.916	262	262;288;290;292;117;121;126;147;214;293;293;293;293;293;293;66;180;54	0	38.311	14.1	18.3	10.7	29.4	25.6	29.4	25.6	29.4	33.2	4386000000	46358000	40133000	43637000	577140000	506530000	583760000	794410000
O96008;K7EKG4;K7EJ57	O96008;K7EKG4	Mitochondrial import receptor subunit TOM40 homolog	TOMM40	sp|O96008|TOM40_HUMAN Mitochondrial import receptor subunit TOM40 homolog OS=Homo sapiens OX=9606 GN=TOMM40 PE=1 SV=1;tr|K7EKG4|K7EKG4_HUMAN Mitochondrial import receptor subunit TOM40 homolog (Fragment) OS=Homo sapiens OX=9606 GN=TOMM40 PE=1 SV=1	3	5	5	1	0	0	3	3	2	3	4	4	1	0	0	3	3	2	3	4	4	25.2	25.2	37.893	361	361;168;214	0	38.277	3	0	0	12.7	12.7	8.3	17.7	22.2	22.2	408690000	3319800	0	0	39786000	37235000	23087000	59161000
Q13045;J3KS54;J3QQQ2;J3KS39;K7EP37;J3QQU5;K7EP27;K7EQZ7	Q13045	Protein flightless-1 homolog	FLII	sp|Q13045|FLII_HUMAN Protein flightless-1 homolog OS=Homo sapiens OX=9606 GN=FLII PE=1 SV=2	8	12	12	0	0	0	8	5	2	5	5	3	0	0	0	8	5	2	5	5	3	14.9	14.9	144.75	1269	1269;700;279;51;99;117;133;207	0	38.162	0	0	0	8.9	5.1	2.4	6.5	6.1	3.9	809690000	0	0	0	152030000	147270000	46475000	200060000
E9PLA9;Q14444;G3V153	E9PLA9;Q14444;G3V153	Caprin-1	CAPRIN1	tr|E9PLA9|E9PLA9_HUMAN Caprin-1 (Fragment) OS=Homo sapiens OX=9606 GN=CAPRIN1 PE=1 SV=1;sp|Q14444|CAPR1_HUMAN Caprin-1 OS=Homo sapiens OX=9606 GN=CAPRIN1 PE=1 SV=2;tr|G3V153|G3V153_HUMAN Caprin-1 OS=Homo sapiens OX=9606 GN=CAPRIN1 PE=1 SV=1	3	4	4	2	1	2	2	1	0	2	3	1	2	1	2	2	1	0	2	3	1	40.9	40.9	20.236	186	186;709;628	0	38.138	12.4	6.5	12.4	12.4	5.9	0	29	34.9	6.5	483860000	0	3754100	13224000	73367000	0	0	146900000
Q32Q12;J3KPD9;P22392;F6XY72;O60361	Q32Q12;J3KPD9;P22392	Nucleoside diphosphate kinase;Nucleoside diphosphate kinase B	NME1-NME2;NME2	tr|Q32Q12|Q32Q12_HUMAN Nucleoside diphosphate kinase OS=Homo sapiens OX=9606 GN=NME1-NME2 PE=1 SV=1;tr|J3KPD9|J3KPD9_HUMAN NME1-NME2 readthrough OS=Homo sapiens OX=9606 GN=NME1-NME2 PE=1 SV=1;sp|P22392|NDKB_HUMAN Nucleoside diphosphate kinase B OS=Homo sap	5	12	3	4	3	3	9	8	8	8	9	12	0	0	0	2	2	2	0	1	3	57.9	9.9	32.642	292	292;197;152;82;137	0	38.069	29.5	25.3	26	45.2	43.8	43.8	41.4	44.9	57.9	18490000000	226530000	199890000	223470000	2790300000	2010900000	2133200000	3994600000
A0A0G2JMN8;A0A0G2JM13;A0A0G2JR74;P02812;A0A0G2JRP6;A0A0D9SET1;G3V1R1;A0A0G2JQ42	A0A0G2JMN8;A0A0G2JM13;A0A0G2JR74;P02812;A0A0G2JRP6;A0A0D9SET1	Basic salivary proline-rich protein 2;Basic proline-rich peptide IB-1;Basic proline-rich peptide P-E;Basic proline-rich peptide IB-7;Basic proline-rich peptide IB-8c;Basic proline-rich peptide IB-4	PRB2;PRB1	tr|A0A0G2JMN8|A0A0G2JMN8_HUMAN Basic salivary proline-rich protein 1 OS=Homo sapiens OX=9606 GN=PRB1 PE=1 SV=1;tr|A0A0G2JM13|A0A0G2JM13_HUMAN Basic salivary proline-rich protein 1 OS=Homo sapiens OX=9606 GN=PRB1 PE=1 SV=1;tr|A0A0G2JR74|A0A0G2JR74_HUMAN Bas	8	6	3	0	0	2	0	0	0	0	0	6	0	0	0	0	0	0	0	0	3	60.4	21.3	32.863	333	333;416;580;416;198;151;178;178	0	38.063	0	0	32.4	0	0	0	0	0	60.4	39899000	0	0	9445900	0	0	0	0
E9PCR7;Q02218;A0A0D9SFS3;E9PDF2;E9PFG7;Q9ULD0;C9J4G7	E9PCR7;Q02218;A0A0D9SFS3;E9PDF2;E9PFG7	2-oxoglutarate dehydrogenase, mitochondrial	OGDH	tr|E9PCR7|E9PCR7_HUMAN 2-oxoglutarate dehydrogenase, mitochondrial OS=Homo sapiens OX=9606 GN=OGDH PE=1 SV=1;sp|Q02218|ODO1_HUMAN 2-oxoglutarate dehydrogenase, mitochondrial OS=Homo sapiens OX=9606 GN=OGDH PE=1 SV=3;tr|A0A0D9SFS3|A0A0D9SFS3_HUMAN 2-oxoglut	7	16	16	0	2	0	6	4	4	5	6	7	0	2	0	6	4	4	5	6	7	22.6	22.6	117.66	1038	1038;1023;1001;1034;873;1010;211	0	37.898	0	1.6	0	10.9	6.1	3.9	8.1	7.7	10.2	846750000	0	8856400	0	150200000	78950000	94627000	127650000
Q6AI08;K7EIX2;A0A087WXZ7;K7ELR8;K7EKW7;K7ELA5;K7ESP5	Q6AI08;K7EIX2;A0A087WXZ7	HEAT repeat-containing protein 6	HEATR6	sp|Q6AI08|HEAT6_HUMAN HEAT repeat-containing protein 6 OS=Homo sapiens OX=9606 GN=HEATR6 PE=1 SV=1;tr|K7EIX2|K7EIX2_HUMAN HEAT repeat-containing protein 6 OS=Homo sapiens OX=9606 GN=HEATR6 PE=1 SV=1;tr|A0A087WXZ7|A0A087WXZ7_HUMAN HEAT repeat-containing pro	7	10	10	0	0	0	5	4	4	6	7	4	0	0	0	5	4	4	6	7	4	14.5	14.5	128.78	1181	1181;1069;916;413;114;120;213	0	37.778	0	0	0	7.4	7.3	5.2	7.5	11.1	7.3	755980000	0	0	0	123410000	85289000	79111000	215760000
A5YKK6;H3BMZ2;H3BTH2;H3BNB1;H3BVC9;H3BR89;H3BMH0	A5YKK6	CCR4-NOT transcription complex subunit 1	CNOT1	sp|A5YKK6|CNOT1_HUMAN CCR4-NOT transcription complex subunit 1 OS=Homo sapiens OX=9606 GN=CNOT1 PE=1 SV=2	7	20	20	0	0	0	6	9	6	15	14	10	0	0	0	6	9	6	15	14	10	11.7	11.7	266.94	2376	2376;439;68;185;241;193;277	0	37.775	0	0	0	3	4.5	2.9	7.9	8.2	5.7	1908800000	0	0	0	107030000	290960000	139970000	563930000
P55263;A0A5F9ZHJ1;A0A5K1VW54;A0A5K1VW94;A0A5F9ZH31;A0A5F9ZGZ8;A0A5F9ZH72;A0A5F9ZH83	P55263;A0A5F9ZHJ1;A0A5K1VW54;A0A5K1VW94;A0A5F9ZH31;A0A5F9ZGZ8;A0A5F9ZH72	Adenosine kinase	ADK	sp|P55263|ADK_HUMAN Adenosine kinase OS=Homo sapiens OX=9606 GN=ADK PE=1 SV=2;tr|A0A5F9ZHJ1|A0A5F9ZHJ1_HUMAN Adenosine kinase OS=Homo sapiens OX=9606 GN=ADK PE=1 SV=1;tr|A0A5K1VW54|A0A5K1VW54_HUMAN Adenosine kinase OS=Homo sapiens OX=9606 GN=ADK PE=4 SV=1;	8	11	11	1	0	0	5	5	6	9	8	8	1	0	0	5	5	6	9	8	8	43.1	43.1	40.545	362	362;270;347;356;294;179;229;99	0	37.744	3.6	0	0	19.3	16.3	19.6	39.5	30.7	33.4	1849400000	0	0	0	144410000	135170000	133840000	633670000
P61106;X6RFL8	P61106;X6RFL8	Ras-related protein Rab-14	RAB14	sp|P61106|RAB14_HUMAN Ras-related protein Rab-14 OS=Homo sapiens OX=9606 GN=RAB14 PE=1 SV=4;tr|X6RFL8|X6RFL8_HUMAN Ras-related protein Rab-14 (Fragment) OS=Homo sapiens OX=9606 GN=RAB14 PE=1 SV=1	2	11	11	1	0	1	6	4	4	6	9	7	1	0	1	6	4	4	6	9	7	70.7	70.7	23.897	215	215;181	0	37.697	14	0	14	39.5	27.4	27.4	40	59.1	52.6	2837900000	6550500	0	6169300	308230000	288120000	257190000	601560000
Q9BU23	Q9BU23	Lipase maturation factor 2	LMF2	sp|Q9BU23|LMF2_HUMAN Lipase maturation factor 2 OS=Homo sapiens OX=9606 GN=LMF2 PE=1 SV=2	1	8	8	0	0	0	5	3	5	3	3	6	0	0	0	5	3	5	3	3	6	16.4	16.4	79.697	707	707	0	37.657	0	0	0	9.6	5.7	10.2	5.7	6.6	13.3	868290000	0	0	0	108210000	77429000	151660000	96682000
O15371;B0QYA5;B0QYA6;B0QYA8;B0QYA4	O15371;B0QYA5	Eukaryotic translation initiation factor 3 subunit D	EIF3D	sp|O15371|EIF3D_HUMAN Eukaryotic translation initiation factor 3 subunit D OS=Homo sapiens OX=9606 GN=EIF3D PE=1 SV=1;tr|B0QYA5|B0QYA5_HUMAN Eukaryotic translation initiation factor 3 subunit D (Fragment) OS=Homo sapiens OX=9606 GN=EIF3D PE=1 SV=1	5	12	12	1	2	1	8	6	6	8	9	8	1	2	1	8	6	6	8	9	8	33.2	33.2	63.972	548	548;269;173;123;105	0	37.592	2.6	4.4	1.8	22.6	16.4	13.5	19.9	24.5	25	4919800000	11677000	9886500	5605400	1485500000	317290000	252420000	473690000
P46778;G3V1B3;M0R181	P46778;G3V1B3;M0R181	60S ribosomal protein L21	RPL21	sp|P46778|RL21_HUMAN 60S ribosomal protein L21 OS=Homo sapiens OX=9606 GN=RPL21 PE=1 SV=2;tr|G3V1B3|G3V1B3_HUMAN 60S ribosomal protein L21 OS=Homo sapiens OX=9606 GN=RPL21 PE=1 SV=1;tr|M0R181|M0R181_HUMAN 60S ribosomal protein L21 (Fragment) OS=Homo sapien	3	5	5	3	2	2	3	3	3	3	3	3	3	2	2	3	3	3	3	3	3	28.1	28.1	18.565	160	160;87;122	0	37.572	25	16.2	16.2	27.5	27.5	16.9	27.5	27.5	27.5	11207000000	196620000	107100000	259720000	1445700000	1329100000	1354800000	2189500000
H3BRG4;P22695;H3BSJ9;H3BP04;H3BUE4;H3BUI9;A0A087WVZ4	H3BRG4;P22695;H3BSJ9;H3BP04	Cytochrome b-c1 complex subunit 2, mitochondrial	UQCRC2	tr|H3BRG4|H3BRG4_HUMAN Cytochrome b-c1 complex subunit 2, mitochondrial OS=Homo sapiens OX=9606 GN=UQCRC2 PE=1 SV=1;sp|P22695|QCR2_HUMAN Cytochrome b-c1 complex subunit 2, mitochondrial OS=Homo sapiens OX=9606 GN=UQCRC2 PE=1 SV=3;tr|H3BSJ9|H3BSJ9_HUMAN Cyt	7	10	10	1	1	0	8	6	6	8	6	6	1	1	0	8	6	6	8	6	6	35.7	35.7	44.634	412	412;453;336;176;116;132;70	0	37.219	3.2	3.2	0	28.9	21.8	21.4	27.2	21.1	20.1	1133100000	3952900	7421700	0	190230000	76024000	115710000	175900000
O75874;C9J4N6;C9JJE5;C9JLU6	O75874	Isocitrate dehydrogenase [NADP] cytoplasmic	IDH1	sp|O75874|IDHC_HUMAN Isocitrate dehydrogenase [NADP] cytoplasmic OS=Homo sapiens OX=9606 GN=IDH1 PE=1 SV=2	4	13	13	2	3	1	9	6	8	7	7	7	2	3	1	9	6	8	7	7	7	42.8	42.8	46.659	414	414;157;62;73	0	37.17	5.8	9.2	2.7	31.9	18.1	21.7	25.8	18.1	23.7	1820900000	9333000	13866000	5587100	258160000	243050000	224910000	387780000
P54727;Q5W0S4;Q5W0S5;H0Y579	P54727	UV excision repair protein RAD23 homolog B	RAD23B	sp|P54727|RD23B_HUMAN UV excision repair protein RAD23 homolog B OS=Homo sapiens OX=9606 GN=RAD23B PE=1 SV=1	4	9	9	1	2	1	5	4	2	5	5	1	1	2	1	5	4	2	5	5	1	42.1	42.1	43.171	409	409;80;146;114	0	37.112	7.1	9	7.1	20.3	16.6	9	28.1	22	7.1	933980000	3924600	8063400	6119600	180120000	166810000	86311000	225290000
Q9Y617	Q9Y617	Phosphoserine aminotransferase	PSAT1	sp|Q9Y617|SERC_HUMAN Phosphoserine aminotransferase OS=Homo sapiens OX=9606 GN=PSAT1 PE=1 SV=2	1	15	15	2	2	1	14	14	12	14	13	13	2	2	1	14	14	12	14	13	13	46.8	46.8	40.422	370	370	0	37.067	6.5	5.7	3.8	46.5	44.1	41.1	45.1	44.9	44.9	6106300000	31056000	13688000	10085000	935350000	772760000	582050000	1410100000
P49721;A0A087WVV1	P49721;A0A087WVV1	Proteasome subunit beta type-2	PSMB2	sp|P49721|PSB2_HUMAN Proteasome subunit beta type-2 OS=Homo sapiens OX=9606 GN=PSMB2 PE=1 SV=1;tr|A0A087WVV1|A0A087WVV1_HUMAN Proteasome subunit beta type-2 OS=Homo sapiens OX=9606 GN=PSMB2 PE=1 SV=1	2	10	10	2	1	3	7	5	6	7	8	6	2	1	3	7	5	6	7	8	6	56.2	56.2	22.836	201	201;84	0	37.002	12.4	7.5	20.4	45.3	32.8	30.8	36.3	47.8	40.3	5062900000	2134900	8089600	16429000	680980000	453490000	720970000	1048900000
A0A0A0MRJ3;Q8NEY1	A0A0A0MRJ3;Q8NEY1	Neuron navigator 1	NAV1	tr|A0A0A0MRJ3|A0A0A0MRJ3_HUMAN Neuron navigator 1 OS=Homo sapiens OX=9606 GN=NAV1 PE=1 SV=1;sp|Q8NEY1|NAV1_HUMAN Neuron navigator 1 OS=Homo sapiens OX=9606 GN=NAV1 PE=1 SV=2	2	8	8	0	0	0	2	7	3	4	4	2	0	0	0	2	7	3	4	4	2	7.8	7.8	197.4	1830	1830;1877	0	36.869	0	0	0	1.7	6.7	3.2	4.3	3.7	2.2	348920000	0	0	0	20058000	56538000	29582000	121390000
F8W1R7;G3V1V0;P60660;J3KND3;G8JLA2;B7Z6Z4;G3V1Y7;F8VPF3;F8VZU9;F8W180;F8W1I5;P14649;H0YI43	F8W1R7;G3V1V0;P60660;J3KND3;G8JLA2;B7Z6Z4;G3V1Y7;F8VPF3	Myosin light polypeptide 6	MYL6	tr|F8W1R7|F8W1R7_HUMAN Myosin light polypeptide 6 OS=Homo sapiens OX=9606 GN=MYL6 PE=1 SV=1;tr|G3V1V0|G3V1V0_HUMAN Myosin light polypeptide 6 OS=Homo sapiens OX=9606 GN=MYL6 PE=1 SV=1;sp|P60660|MYL6_HUMAN Myosin light polypeptide 6 OS=Homo sapiens OX=9606	13	7	7	3	5	4	7	6	6	6	7	6	3	5	4	7	6	6	6	7	6	51.7	51.7	16.29	145	145;161;151;152;152;238;115;130;103;196;175;208;83	0	36.598	26.9	40.7	35.2	51.7	40.7	43.4	40.7	51.7	51.7	6508800000	78649000	105660000	94489000	875460000	930750000	891030000	1133400000
E9PCB6;Q9BYT8;H0YAF7;H0YAK4	E9PCB6;Q9BYT8;H0YAF7;H0YAK4	Neurolysin, mitochondrial	NLN	tr|E9PCB6|E9PCB6_HUMAN Neurolysin, mitochondrial OS=Homo sapiens OX=9606 GN=NLN PE=1 SV=1;sp|Q9BYT8|NEUL_HUMAN Neurolysin, mitochondrial OS=Homo sapiens OX=9606 GN=NLN PE=1 SV=1;tr|H0YAF7|H0YAF7_HUMAN Neurolysin, mitochondrial (Fragment) OS=Homo sapiens OX	4	4	4	0	0	0	3	2	1	3	2	1	0	0	0	3	2	1	3	2	1	9	9	68.867	600	600;704;283;414	0	36.451	0	0	0	5.8	4.2	1.7	7.3	4.2	2	177750000	0	0	0	47475000	0	17637000	51382000
O15067;H0YGH1;J3QSG0;J3QSH6;J3KTL4;J3KT98	O15067	Phosphoribosylformylglycinamidine synthase	PFAS	sp|O15067|PUR4_HUMAN Phosphoribosylformylglycinamidine synthase OS=Homo sapiens OX=9606 GN=PFAS PE=1 SV=4	6	14	14	0	0	0	8	4	3	9	7	6	0	0	0	8	4	3	9	7	6	19.4	19.4	144.73	1338	1338;385;131;135;103;116	0	36.405	0	0	0	10.7	4.6	4.9	13.2	10.8	8.1	882410000	0	0	0	139990000	86987000	66106000	272060000
P46063;F8WA66;F8WD97;F5H2L2;F5H4P4;F5H3W0;F5GYB7	P46063	ATP-dependent DNA helicase Q1	RECQL	sp|P46063|RECQ1_HUMAN ATP-dependent DNA helicase Q1 OS=Homo sapiens OX=9606 GN=RECQL PE=1 SV=3	7	15	15	0	2	0	7	6	6	8	8	13	0	2	0	7	6	6	8	8	13	33.6	33.6	73.457	649	649;199;211;131;96;106;72	0	36.397	0	4.2	0	15.3	12.5	12	20.6	17.6	28.5	1668800000	0	0	0	211560000	159310000	225680000	294800000
P25786;F5GX11;B4DEV8	P25786;F5GX11	Proteasome subunit alpha type-1	PSMA1	sp|P25786|PSA1_HUMAN Proteasome subunit alpha type-1 OS=Homo sapiens OX=9606 GN=PSMA1 PE=1 SV=1;tr|F5GX11|F5GX11_HUMAN Proteasome endopeptidase complex OS=Homo sapiens OX=9606 GN=PSMA1 PE=1 SV=1	3	10	10	4	3	2	7	5	3	7	6	8	4	3	2	7	5	3	7	6	8	42.2	42.2	29.555	263	263;238;164	0	36.274	20.9	17.9	12.2	28.5	22.4	16.3	29.7	22.4	35	4799900000	805440000	63560000	452650000	520470000	672960000	51007000	801950000
Q71U36;P0DPH8;P0DPH7;Q6PEY2;F8VQQ4	Q71U36;P0DPH8;P0DPH7;Q6PEY2	Tubulin alpha-1A chain;Tubulin alpha-3E chain	TUBA1A;TUBA3E	sp|Q71U36|TBA1A_HUMAN Tubulin alpha-1A chain OS=Homo sapiens OX=9606 GN=TUBA1A PE=1 SV=1;sp|P0DPH8|TBA3D_HUMAN Tubulin alpha-3D chain OS=Homo sapiens OX=9606 GN=TUBA3D PE=1 SV=1;sp|P0DPH7|TBA3C_HUMAN Tubulin alpha-3C chain OS=Homo sapiens OX=9606 GN=TUBA3C	5	37	1	18	14	17	27	27	30	28	28	34	1	1	1	1	1	1	1	1	1	86.9	3.1	50.135	451	451;450;450;450;219	0	36.205	62.3	51.2	60.3	68.1	67.8	75.8	67	75.8	84.7	61188000000	242730000	138220000	323410000	9728700000	8726200000	8875900000	10069000000
P40261	P40261	Nicotinamide N-methyltransferase	NNMT	sp|P40261|NNMT_HUMAN Nicotinamide N-methyltransferase OS=Homo sapiens OX=9606 GN=NNMT PE=1 SV=1	1	6	6	2	2	1	6	5	4	4	5	4	2	2	1	6	5	4	4	5	4	27.7	27.7	29.574	264	264	0	36.094	9.5	9.5	6.4	27.7	24.6	21.6	21.6	24.6	21.6	4602700000	10281000	1432700	5414000	664590000	751520000	520770000	1030900000
A0A3B3IUB5;Q8TCT9;A0A0S2Z6F0;A0A3B3IT72;A0A0C4DGU3	A0A3B3IUB5;Q8TCT9;A0A0S2Z6F0;A0A3B3IT72	Minor histocompatibility antigen H13	HM13	tr|A0A3B3IUB5|A0A3B3IUB5_HUMAN Minor histocompatibility antigen H13 OS=Homo sapiens OX=9606 GN=HM13 PE=1 SV=1;sp|Q8TCT9|HM13_HUMAN Minor histocompatibility antigen H13 OS=Homo sapiens OX=9606 GN=HM13 PE=1 SV=1;tr|A0A0S2Z6F0|A0A0S2Z6F0_HUMAN Histocompatibil	5	6	2	2	0	1	6	6	4	5	6	5	1	0	1	2	2	2	2	2	2	17.4	5.7	46.313	420	420;377;345;365;143	0	36.037	8.1	0	5.7	17.4	17.4	11	16.9	17.4	16.9	5366600000	4960500	0	4341800	921630000	758990000	307020000	1135900000
A0A0C4DGS1;P39656;U3KQ84	A0A0C4DGS1;P39656	Dolichyl-diphosphooligosaccharide--protein glycosyltransferase 48 kDa subunit	DDOST	tr|A0A0C4DGS1|A0A0C4DGS1_HUMAN Dolichyl-diphosphooligosaccharide--protein glycosyltransferase 48 kDa subunit OS=Homo sapiens OX=9606 GN=DDOST PE=1 SV=1;sp|P39656|OST48_HUMAN Dolichyl-diphosphooligosaccharide--protein glycosyltransferase 48 kDa subunit OS=H	3	12	12	0	4	2	10	10	9	10	10	10	0	4	2	10	10	9	10	10	10	39.6	39.6	48.799	439	439;456;154	0	36.037	0	11.6	5.7	32.1	32.8	23.5	32.8	24.8	36.7	4993600000	0	21583000	3886700	574110000	575480000	640740000	919330000
P17252;J3KRN5;P05771;H3BV73	P17252;J3KRN5	Protein kinase C alpha type	PRKCA	sp|P17252|KPCA_HUMAN Protein kinase C alpha type OS=Homo sapiens OX=9606 GN=PRKCA PE=1 SV=4;tr|J3KRN5|J3KRN5_HUMAN Protein kinase C alpha type OS=Homo sapiens OX=9606 GN=PRKCA PE=1 SV=1	4	12	10	2	1	2	7	5	6	8	6	6	2	1	2	6	4	4	7	5	5	29.2	23.7	76.749	672	672;308;671;130	0	36	5.1	2.4	5.1	18.5	12.6	17.6	19.6	16.1	15.6	1196500000	3804200	1798000	0	200250000	211420000	137000000	176760000
P05141;Q9H0C2	P05141	ADP/ATP translocase 2;ADP/ATP translocase 2, N-terminally processed	SLC25A5	sp|P05141|ADT2_HUMAN ADP/ATP translocase 2 OS=Homo sapiens OX=9606 GN=SLC25A5 PE=1 SV=7	2	16	6	4	5	3	12	12	12	11	10	13	1	1	0	5	5	5	6	5	6	47	19.5	32.852	298	298;315	0	35.984	13.1	17.8	10.1	34.9	34.9	34.9	31.9	29.5	38.3	6240300000	13765000	7333200	0	837710000	650690000	751810000	1048600000
P19623;K7EQ47;K7ESL0;K7EL89;K7EKM4	P19623	Spermidine synthase	SRM	sp|P19623|SPEE_HUMAN Spermidine synthase OS=Homo sapiens OX=9606 GN=SRM PE=1 SV=1	5	12	12	0	1	0	8	6	2	6	4	7	0	1	0	8	6	2	6	4	7	64.9	64.9	33.824	302	302;134;119;83;93	0	35.981	0	7.9	0	38.4	30.5	11.6	30.1	21.9	35.8	1486800000	0	7008300	0	331790000	173200000	36665000	387660000
A0A494C0U1;Q5VZU9;P29144;A0A494C1B8;A0A494C1L2;A0A494C1S6;A0A494C1S4;A0A494C0A3	A0A494C0U1;Q5VZU9;P29144;A0A494C1B8	Tripeptidyl-peptidase 2	TPP2	tr|A0A494C0U1|A0A494C0U1_HUMAN Tripeptidyl-peptidase 2 (Fragment) OS=Homo sapiens OX=9606 GN=TPP2 PE=1 SV=1;tr|Q5VZU9|Q5VZU9_HUMAN Tripeptidyl-peptidase 2 OS=Homo sapiens OX=9606 GN=TPP2 PE=1 SV=1;sp|P29144|TPP2_HUMAN Tripeptidyl-peptidase 2 OS=Homo sapien	8	10	10	1	2	0	8	6	4	7	3	1	1	2	0	8	6	4	7	3	1	15.4	15.4	130.36	1179	1179;1262;1249;1173;101;124;192;217	0	35.974	1.9	3	0	13.5	10.5	6.4	11	4.2	2	541980000	0	3506400	0	137710000	112010000	74204000	122310000
Q16222;Q3KQV9	Q16222	UDP-N-acetylhexosamine pyrophosphorylase;UDP-N-acetylgalactosamine pyrophosphorylase;UDP-N-acetylglucosamine pyrophosphorylase	UAP1	sp|Q16222|UAP1_HUMAN UDP-N-acetylhexosamine pyrophosphorylase OS=Homo sapiens OX=9606 GN=UAP1 PE=1 SV=3	2	9	9	0	1	0	7	5	1	7	7	2	0	1	0	7	5	1	7	7	2	26.2	26.2	58.768	522	522;507	0	35.922	0	2.7	0	21.5	13.8	2.7	19.9	20.1	6.3	958840000	0	2909700	0	157870000	108180000	50518000	348800000
Q12792;F8VRG3;F8VS81	Q12792	Twinfilin-1	TWF1	sp|Q12792|TWF1_HUMAN Twinfilin-1 OS=Homo sapiens OX=9606 GN=TWF1 PE=1 SV=3	3	5	5	1	1	0	3	4	2	4	4	2	1	1	0	3	4	2	4	4	2	14.6	14.6	40.282	350	350;59;291	0	35.922	3.7	3.7	0	8.9	13.1	8.9	14.6	10.9	5.7	901540000	7269700	3918400	0	120620000	115260000	64439000	264840000
A0A024R571;Q9H4M9;C9J2Z4;C9JC03;C9JDQ8;C9JIJ3;C9IZH1	A0A024R571;Q9H4M9;C9J2Z4;C9JC03;C9JDQ8	EH domain-containing protein 1	EHD1	tr|A0A024R571|A0A024R571_HUMAN EH domain-containing protein 1 OS=Homo sapiens OX=9606 GN=EHD1 PE=1 SV=1;sp|Q9H4M9|EHD1_HUMAN EH domain-containing protein 1 OS=Homo sapiens OX=9606 GN=EHD1 PE=1 SV=2;tr|C9J2Z4|C9J2Z4_HUMAN EH domain-containing protein 1 (Fra	7	16	9	0	1	0	8	9	7	10	9	12	0	0	0	5	5	3	6	6	6	35.6	21	61.927	548	548;534;306;374;162;145;148	0	35.858	0	2.2	0	19.3	18.8	15.9	21.2	18.8	29	2840500000	0	4274200	0	167220000	213530000	1638100000	297940000
A0A494C017;C9JJV6;C9JZL8;A0A499FIY8;C9JC07;Q96S97	A0A494C017;C9JJV6;C9JZL8;A0A499FIY8;C9JC07;Q96S97	Myeloid-associated differentiation marker	MYADM	tr|A0A494C017|A0A494C017_HUMAN Myeloid-associated differentiation marker (Fragment) OS=Homo sapiens OX=9606 GN=MYADM PE=1 SV=1;tr|C9JJV6|C9JJV6_HUMAN Myeloid-associated differentiation marker (Fragment) OS=Homo sapiens OX=9606 GN=MYADM PE=1 SV=8;tr|C9JZL8|	6	2	2	0	0	1	1	1	2	2	1	1	0	0	1	1	1	2	2	1	1	27	27	13.153	122	122;146;188;203;259;322	0	35.803	0	0	18.9	18.9	18.9	27	27	18.9	18.9	702360000	0	0	0	20401000	26272000	115520000	225150000
Q12768;E7EQI7;E5RFU6	Q12768;E7EQI7	WASH complex subunit strumpellin	KIAA0196	sp|Q12768|WASC5_HUMAN WASH complex subunit 5 OS=Homo sapiens OX=9606 GN=WASHC5 PE=1 SV=1;tr|E7EQI7|E7EQI7_HUMAN WASH complex subunit 5 OS=Homo sapiens OX=9606 GN=WASHC5 PE=1 SV=1	3	11	11	0	0	0	6	5	4	9	9	5	0	0	0	6	5	4	9	9	5	12.3	12.3	134.28	1159	1159;1011;163	0	35.76	0	0	0	7.6	5.7	4.2	9.1	9.5	4.9	809980000	0	0	0	134220000	74775000	34006000	211900000
Q32P28;E2QRI1;H7C2W6	Q32P28	Prolyl 3-hydroxylase 1	LEPRE1	sp|Q32P28|P3H1_HUMAN Prolyl 3-hydroxylase 1 OS=Homo sapiens OX=9606 GN=P3H1 PE=1 SV=2	3	11	11	1	2	1	9	7	4	4	7	4	1	2	1	9	7	4	4	7	4	24.7	24.7	83.393	736	736;207;222	0	35.709	1.4	3.4	1.4	21.7	14.5	6.5	9.4	14.1	9.9	1390200000	9685700	9820200	6319600	616480000	172200000	100830000	156760000
P04921	P04921	Glycophorin-C	GYPC	sp|P04921|GLPC_HUMAN Glycophorin-C OS=Homo sapiens OX=9606 GN=GYPC PE=1 SV=1	1	1	1	0	0	0	1	0	0	1	1	0	0	0	0	1	0	0	1	1	0	20.3	20.3	13.81	128	128	0	35.678	0	0	0	20.3	0	0	20.3	20.3	0	103860000	0	0	0	33894000	0	0	0
P08754	P08754	Guanine nucleotide-binding protein G(k) subunit alpha	GNAI3	sp|P08754|GNAI3_HUMAN Guanine nucleotide-binding protein G(i) subunit alpha OS=Homo sapiens OX=9606 GN=GNAI3 PE=1 SV=3	1	12	8	5	5	5	7	8	5	7	9	6	2	2	1	4	5	2	4	6	3	39	26.3	40.532	354	354	0	35.67	17.2	18.1	16.9	27.1	27.1	20.1	26.6	33.6	22	1226400000	6277100	8171300	3995400	119810000	161970000	44397000	259640000
P31153;Q00266	P31153	S-adenosylmethionine synthase isoform type-2	MAT2A	sp|P31153|METK2_HUMAN S-adenosylmethionine synthase isoform type-2 OS=Homo sapiens OX=9606 GN=MAT2A PE=1 SV=1	2	9	9	1	2	3	6	7	5	6	5	7	1	2	3	6	7	5	6	5	7	26.6	26.6	43.66	395	395;395	0	35.56	3.8	6.6	10.4	22.5	21.3	17.5	15.9	12.4	26.3	2069300000	5722600	11121000	27497000	311780000	203800000	220690000	439220000
E7EX44;Q05682;E9PGZ1;C9J813;C9JEK3	E7EX44;Q05682;E9PGZ1;C9J813	Caldesmon	CALD1	tr|E7EX44|E7EX44_HUMAN Caldesmon OS=Homo sapiens OX=9606 GN=CALD1 PE=1 SV=1;sp|Q05682|CALD1_HUMAN Caldesmon OS=Homo sapiens OX=9606 GN=CALD1 PE=1 SV=3;tr|E9PGZ1|E9PGZ1_HUMAN Caldesmon OS=Homo sapiens OX=9606 GN=CALD1 PE=1 SV=1;tr|C9J813|C9J813_HUMAN Caldes	5	8	8	1	1	1	4	4	2	5	5	5	1	1	1	4	4	2	5	5	5	23.2	23.2	64.168	557	557;793;536;459;132	0	35.512	2.2	2.2	2.2	13.3	12.9	7	14.9	16.3	15.8	731830000	3920900	0	4393900	88221000	59809000	53088000	177240000
P05120;H7C004;H7BYS2;E7ERB5;E7EPJ9;E9PDK7	P05120;H7C004;H7BYS2	Plasminogen activator inhibitor 2	SERPINB2;SERPINB10	sp|P05120|PAI2_HUMAN Plasminogen activator inhibitor 2 OS=Homo sapiens OX=9606 GN=SERPINB2 PE=1 SV=2;tr|H7C004|H7C004_HUMAN Serpin B10 (Fragment) OS=Homo sapiens OX=9606 GN=SERPINB10 PE=1 SV=1;tr|H7BYS2|H7BYS2_HUMAN Serpin B10 (Fragment) OS=Homo sapiens OX	6	11	11	1	0	0	4	6	5	6	7	5	1	0	0	4	6	5	6	7	5	36.4	36.4	46.596	415	415;253;280;132;161;113	0	35.413	1.9	0	0	17.3	26.3	14.7	27	24.6	17.6	709260000	0	0	0	66595000	80381000	52490000	222390000
O60488;D6RF95;H0Y9A0;D6RDA8;D6RD96	O60488	Long-chain-fatty-acid--CoA ligase 4	ACSL4	sp|O60488|ACSL4_HUMAN Long-chain-fatty-acid--CoA ligase 4 OS=Homo sapiens OX=9606 GN=ACSL4 PE=1 SV=2	5	13	11	1	3	1	5	7	4	9	11	9	0	1	0	4	5	2	7	9	8	30.4	26.3	79.187	711	711;154;156;128;145	0	35.4	2.5	6.2	2.5	11.4	16	8	20.3	26.6	20.8	1043700000	0	2222000	0	95267000	112500000	49316000	231820000
Q9NX62;H0YB38	Q9NX62	Inositol monophosphatase 3	IMPAD1	sp|Q9NX62|IMPA3_HUMAN Golgi-resident adenosine 3,5-bisphosphate 3-phosphatase OS=Homo sapiens OX=9606 GN=IMPAD1 PE=1 SV=1	2	4	4	0	0	0	2	2	1	3	3	4	0	0	0	2	2	1	3	3	4	27.9	27.9	38.681	359	359;82	0	35.387	0	0	0	11.1	15.3	7.2	19.2	19.2	27.9	549510000	0	0	0	53274000	56466000	45751000	145710000
Q92572;F5H459	Q92572;F5H459	AP-3 complex subunit sigma-1	AP3S1	sp|Q92572|AP3S1_HUMAN AP-3 complex subunit sigma-1 OS=Homo sapiens OX=9606 GN=AP3S1 PE=1 SV=1;tr|F5H459|F5H459_HUMAN AP complex subunit sigma OS=Homo sapiens OX=9606 GN=AP3S1 PE=1 SV=1	2	2	2	1	1	1	1	2	1	1	1	0	1	1	1	1	2	1	1	1	0	12.4	12.4	21.732	193	193;162	0	35.386	7.8	7.8	7.8	7.8	12.4	7.8	7.8	7.8	0	164940000	1380800	1657000	0	0	36020000	26504000	51074000
[truncated: 2,639 more rows]
[truncated: 21 more columns]

## Sheet: Table S2. Statistical Analysis 
Supplementary Table S3: Results of Potential Targets by Statistical Analysis
Total proteins count: 967
[truncated: 969 more rows]
